# Supplementary material for: The abnormal expression of circ-ARAP2 promotes ESCC progression through regulating miR-761/FOXM1 axis-mediated stemness and the endothelial–mesenchymal transition
Source: J Transl Med. 2022 Jul 16;20:318. doi: 10.1186/s12967-022-03507-3 (PMC9287963; doi:10.1186/s12967-022-03507-3)
Supplement: Supplementary file 2 — Additional file 2. High-throughput sequencing for mRNA expression detection. [file 12967_2022_3507_MOESM2_ESM.xlsx]

## Sheet: up_T_vs_N
#log2FC >= 0.585 #p-value cut-off <= 0.05 #q-value cut-off <= 1.00 #Gene biotype: processed_transcript,lincRNA,3prime_overlapping_ncrna,antisense,non_coding,sense_intronic,sense_overlapping,TEC,known_ncrna,macro_lncRNA,bidirectional_promoter_lncrna,ncRNA,protein_coding #Condition pair: up_T_vs_N Column A: Track_id, The database name in gene level. Column B: Gene_Name, The name of gene. Column C: …
Annotation					DE Statistic				FPKM
Track_id	Gene_Name	Locus	Strand	Gene_Type	log2FC	Fold_Change	p_value	q_value	T_FPKM	N_FPKM	N-1	N-2	N-3	N-4	T-1	T-2	T-3	T-4
ENSG00000205420.10_2	KRT6A	chr12:52880958-52887041	-	protein_coding	6.02518	65.1267	0.000368812	0.00917927	9.62532	3.60015	17.6395	39.3397	4.45053	4.27719	327.221	927.476	971.837	1311.41
ENSG00000186847.5_2	KRT14	chr17:39738531-39743173	-	protein_coding	5.95132	61.8766	0.00140284	0.0169668	8.23584	2.28452	5.23031	2.25498	3.89608	4.67448	191.736	48.786	1395.47	615.362
ENSG00000134762.16_3	DSC3	chr18:28569974-28622781	-	protein_coding	5.85351	57.8206	6.77294e-05	0.00523594	7.03379	1.18028	0.787675	3.95237	0.843548	0.616007	126.964	58.8438	292.059	130.36
ENSG00000186081.11_3	KRT5	chr12:52908359-52914471	-	protein_coding	5.83497	57.0821	2.57945e-05	0.0039262	7.99146	2.1565	3.72312	10.3044	1.84867	1.59752	195.079	262.278	254.234	317.344
ENSG00000128422.15_2	KRT17	chr17:39775689-39781094	-	protein_coding	5.76133	54.2415	0.000343057	0.00904112	8.89779	3.13646	6.39719	26.3779	3.7528	5.21237	224.34	878.044	980.103	265.341
ENSG00000185479.5_2	KRT6B	chr12:52840435-52845910	-	protein_coding	5.57121	47.5447	0.00134986	0.01665	7.44219	1.87098	2.08005	14.2153	0.773014	1.15443	50.5874	143.527	237.001	514.488
ENSG00000198074.9_2	AKR1B10	chr7:134212344-134226160	+	protein_coding	5.44635	43.6029	0.000318438	0.00878551	6.63718	1.19083	2.77111	1.81872	0.694664	0.507629	103.33	82.53	326.922	33.3509
ENSG00000175793.11_3	SFN	chr1:27189629-27190948	+	protein_coding	5.37481	41.4933	0.000240687	0.00795475	8.04751	2.6727	4.29594	22.0539	2.59041	2.77072	154.582	292.784	403.511	264.004
ENSG00000196754.10_2	S100A2	chr1:153533584-153540366	-	protein_coding	5.37167	41.4033	8.15498e-05	0.00557312	6.44044	1.06877	1.23021	3.48335	0.15715	0.673333	43.1252	166.157	90.4813	83.3174
ENSG00000134757.4_2	DSG3	chr18:29027758-29058665	+	protein_coding	5.3594	41.0526	0.0016087	0.0182163	6.97271	1.61331	0.763333	15.9212	0.817497	0.615762	127.975	42.0159	204.433	217.363
ENSG00000081277.12_3	PKP1	chr1:201252580-201302121	+	protein_coding	5.26773	38.5253	0.000108951	0.0059213	5.94232	0.674587	0.63044	1.84751	0.277131	0.0946586	56.7728	22.5246	112.698	91.5271
ENSG00000137975.7_2	CLCA2	chr1:86889769-86922241	+	protein_coding	5.20793	36.9609	0.000235996	0.00786759	6.07988	0.871949	0.547648	3.81331	0.240996	0.213515	31.0319	50.4822	145.915	85.4157
ENSG00000230937.11_3	MIR205HG	chr1:209602165-209606183	+	processed_transcript	5.19402	36.6062	8.28818e-06	0.00271703	6.2001	1.00608	0.81603	3.11219	0.739829	0.252387	72.377	72.6695	81.4734	64.5387
ENSG00000262406.2_2	MMP12	chr11:102733467-102745764	-	protein_coding	5.12666	34.9364	0.000232927	0.00783722	5.85561	0.728951	0.323984	1.27342	0.441473	0.739302	28.8961	106.768	139.047	23.916
ENSG00000206075.13_3	SERPINB5	chr18:61143994-61172318	+	protein_coding	4.98914	31.7599	5.60721e-05	0.00503952	5.82354	0.834406	0.549316	2.48323	0.350733	0.386864	30.3034	76.3837	96.3431	42.621
ENSG00000186832.8_3	KRT16	chr17:39766030-39772151	-	protein_coding	4.96457	31.2238	0.00343064	0.0264252	7.60124	2.63667	10.392	10.6971	2.25593	2.44754	115.236	38.7908	582.956	525.38
ENSG00000178363.4_3	CALML3	chr10:5565972-5568734	+	protein_coding	4.95138	30.9396	0.000205806	0.00752104	5.94121	0.989834	0.636229	4.90817	0.373479	0.171546	66.0892	33.1873	61.9425	97.7358
ENSG00000274267.1_2	HIST1H3B	chr6:26031878-26032288	-	protein_coding	4.95112	30.934	8.56676e-05	0.00559742	5.79981	0.848685	1.27701	1.56798	0	0.798717	52.9563	70.8884	23.5332	100.207
ENSG00000276368.1_2	HIST1H2AJ	chr6:27782132-27782518	-	protein_coding	4.91178	30.1019	0.000191266	0.0073155	8.38634	3.47456	12.5058	21.1309	5.15026	7.30572	227.533	540.506	168.363	597.129
ENSG00000171346.15_3	KRT15	chr17:39669995-39678781	-	protein_coding	4.8866	29.581	0.000553099	0.0107614	6.10542	1.21882	1.25013	3.95003	0.685384	0.563477	135.199	20.268	58.7214	128.906
ENSG00000184292.6_2	TACSTD2	chr1:59041095-59043445	-	protein_coding	4.78953	27.6562	0.0021684	0.0210947	7.45703	2.66749	4.94504	32.9897	2.14263	1.56559	278.516	78.7865	220.625	191.841
ENSG00000168143.8_2	FAM83B	chr6:54711569-54806820	+	protein_coding	4.77648	27.4071	5.6757e-05	0.00503952	5.24348	0.466999	0.216887	1.17791	0.175507	0.171674	33.7327	17.1804	73.8271	42.589
ENSG00000167656.4_2	LY6D	chr8:143866296-143868008	-	protein_coding	4.75179	26.9421	2.18826e-05	0.00361265	5.30393	0.552139	0.316993	1.90487	0.0949241	0.103436	24.9712	51.0481	37.3714	45.953
ENSG00000150165.13	ANXA8L1	chr10:47157983-47174093	-	protein_coding	4.70605	26.1013	0.000385114	0.00936272	6.0184	1.31235	0.79157	6.64442	0.669712	0.663433	52.913	40.6511	137.79	55.6495
ENSG00000065618.18_3	COL17A1	chr10:105791044-105845760	-	protein_coding	4.70422	26.0682	0.000713145	0.0121435	5.34948	0.645261	0.600934	0.641583	0.462935	0.556361	13.9233	20.7426	144.441	57.5537
ENSG00000131747.14_2	TOP2A	chr17:38544768-38574202	-	protein_coding	4.6696	25.4501	0.000414884	0.00966983	6.00506	1.33546	1.57503	4.27252	0.565982	0.907529	34.1641	169.943	35.0047	77.6152
ENSG00000189334.8_2	S100A14	chr1:153586731-153589462	-	protein_coding	4.66763	25.4154	0.00873292	0.0439647	7.1644	2.49677	5.23376	46.4671	0.923787	0.782831	80.9255	185.172	77.3613	353.294
ENSG00000117595.10_3	IRF6	chr1:209958968-209979520	-	protein_coding	4.65227	25.1461	1.00996e-05	0.00276635	5.7808	1.12853	0.958694	2.79133	0.660242	0.853352	36.4595	60.4544	74.6029	51.4952
ENSG00000196611.4_2	MMP1	chr11:102660651-102668891	-	protein_coding	4.63712	24.8836	0.00788299	0.041444	6.4911	1.85398	1.29039	9.73946	1.16118	2.21238	43.3863	530.709	149.462	17.438
ENSG00000147676.13_2	MAL2	chr8:120177273-120257913	+	protein_coding	4.6234	24.6481	0.000211509	0.00760891	5.59822	0.974818	1.39189	4.12776	0.0424934	0.166959	71.1182	32.0413	42.9745	51.5567
ENSG00000057149.15_3	SERPINB3	chr18:61322431-61329197	-	protein_coding	4.58845	24.058	0.0290699	0.0914051	6.71542	2.12697	2.15967	33.0589	0.904061	0.776558	93.1771	477.543	8.48496	284.28
ENSG00000096696.13_3	DSP	chr6:7541808-7586950	+	protein_coding	4.51356	22.8411	0.00234734	0.021948	8.3208	3.80724	7.54031	56.9616	10.6176	5.67789	394.004	103.074	428.588	590.889
ENSG00000137440.4_2	FGFBP1	chr4:15937192-15940363	-	protein_coding	4.50928	22.7734	3.48381e-05	0.0044404	5.07448	0.565197	0.377076	1.86572	0	0.214435	40.361	47.0874	27.2263	21.9617
ENSG00000165474.5_2	GJB2	chr13:20761609-20767037	-	protein_coding	4.47653	22.2623	0.00899085	0.04471	6.29643	1.81989	4.83338	10.1771	0.624662	0.466753	36	17.6024	224.321	245.083
ENSG00000169469.8_2	SPRR1B	chr1:153003678-153005376	+	protein_coding	4.45061	21.8659	0.00215439	0.0210408	5.33156	0.880948	1.55052	1.30995	0.394482	0.399984	39.2305	10.9894	27.4073	190.892
ENSG00000184357.4_2	HIST1H1B	chr6:27834627-27835307	-	protein_coding	4.42369	21.4617	0.00215963	0.0210644	7.59883	3.17514	13.5892	11.8002	4.73975	5.2102	239.53	342.147	38.1556	435.98
ENSG00000104140.6_2	RHOV	chr15:41164412-41166487	-	protein_coding	4.39221	20.9984	6.30671e-05	0.00515164	5.06136	0.669154	0.326018	2.3588	0.337987	0.072892	42.3922	18.9066	37.5288	36.3502
ENSG00000124102.4_2	PI3	chr20:43803517-43805185	+	protein_coding	4.38329	20.8691	0.00614531	0.0360706	6.54961	2.16632	8.48083	10.5131	0.619358	1.2968	142.905	129.69	17.9055	215.576
ENSG00000119888.10_2	EPCAM	chr2:47572297-47614740	+	protein_coding	4.37193	20.7054	0.0010609	0.0148267	5.56669	1.19476	0.776337	5.05853	0.44035	0.771217	78.9504	107.293	21.0674	25.4115
ENSG00000073282.12_2	TP63	chr3:189349205-189615068	+	protein_coding	4.34946	20.3854	8.28006e-06	0.00271703	4.96761	0.618146	0.519777	0.951045	0.401506	0.335611	28.8315	26.3758	53.6041	20.4947
ENSG00000166670.9_2	MMP10	chr11:102641234-102651359	-	protein_coding	4.33086	20.1242	0.0137629	0.0574392	5.1466	0.815738	1.01091	1.69891	0.196488	0.478284	16.1871	141.876	143.217	3.44576
ENSG00000170465.9_2	KRT6C	chr12:52862300-52867569	-	protein_coding	4.30151	19.7189	0.0135142	0.0568065	5.7407	1.43919	1.55751	8.62494	0.358097	0.617395	9.574	39.5879	48.8858	380.839
ENSG00000114270.17_3	COL7A1	chr3:48601506-48632700	-	protein_coding	4.22892	18.7513	5.62271e-05	0.00503952	5.84806	1.61914	2.30699	2.67158	1.52285	1.90712	44.3426	41.9259	132.312	41.4297
ENSG00000163347.5_2	CLDN1	chr3:190023490-190040264	-	protein_coding	4.22293	18.6736	0.000266761	0.00824417	5.88981	1.66687	8.44394	1.48458	0.907044	1.2717	81.518	52.3241	49.193	54.9651
ENSG00000183347.14_2	GBP6	chr1:89829617-89852020	+	protein_coding	4.21329	18.5493	0.019391	0.0709106	6.13217	1.91888	1.12748	39.3089	0.80939	0.317554	115.089	20.6906	51.8773	180.779
ENSG00000196344.11_2	ADH7	chr4:100333418-100356894	-	protein_coding	4.20806	18.4821	0.00176423	0.0189782	5.21227	1.00421	0.420228	6.07159	0.470938	0.0957828	87.1995	15.5598	37.792	32.3378
ENSG00000186807.9	ANXA8L2	chr10:47746936-47763041	+	protein_coding	4.17946	18.1194	0.000540632	0.0106059	4.88843	0.708966	0.320024	2.45866	0.133669	0.379444	19.7715	15.5742	79.9857	26.6021
ENSG00000277775.1_2	HIST1H3F	chr6:26250423-26250833	-	protein_coding	4.17936	18.1181	0.000519871	0.0104567	4.66441	0.485054	0.367824	1.19286	0	0.279447	14.7345	57.5286	9.82585	40.479
ENSG00000108602.17_3	ALDH3A1	chr17:19641297-19652256	-	protein_coding	4.10057	17.1551	0.00121348	0.0157702	4.96793	0.867364	0.577011	3.4446	0.257309	0.256899	24.2179	86.392	31.9768	12.2007
ENSG00000197641.11_3	SERPINB13	chr18:61254223-61271873	+	protein_coding	4.09977	17.1456	0.0184676	0.0686969	5.2571	1.15733	0.43935	9.00462	0.343516	0.279248	36.5499	186.201	4.5	54.3223
ENSG00000066279.17_3	ASPM	chr1:197053258-197115824	-	protein_coding	4.08284	16.9456	0.000161488	0.00690192	4.73394	0.651101	0.79098	1.35424	0.25755	0.146932	13.3628	48.5701	17.1892	37.7217
ENSG00000276903.1_2	HIST1H2AL	chr6:27833133-27833525	+	protein_coding	4.05982	16.6774	0.000596961	0.0112411	6.10083	2.04101	3.8546	5.06355	1.73317	2.56514	55.2047	107.463	23.9835	144.688
ENSG00000138271.5_2	GPR87	chr3:151011874-151034740	-	protein_coding	4.04915	16.5545	9.27574e-06	0.00271703	4.49137	0.442223	0.0666596	1.40343	0.171269	0.134944	25.8602	22.3804	18.0524	20.3915
ENSG00000159166.13_3	LAD1	chr1:201342372-201369043	-	protein_coding	4.02993	16.3354	0.000704471	0.0120878	5.16965	1.13972	0.843176	6.19182	0.279713	0.389452	20.5238	40.6682	46.4112	38.4703
ENSG00000121742.16_3	GJB6	chr13:20796110-20806534	-	protein_coding	3.98447	15.8287	0.00651506	0.0372629	5.30744	1.32296	3.96683	3.53866	0.372266	0.266375	23.3605	9.98128	149.708	59.9985
ENSG00000171345.13_2	KRT19	chr17:39679869-39684560	-	protein_coding	3.97456	15.7203	0.0331267	0.0988279	8.09928	4.12472	27.6194	71.5941	7.41124	4.29959	764.89	1025.66	28.5111	242.74
ENSG00000039068.18_3	CDH1	chr16:68771128-68869451	+	protein_coding	3.9706	15.6773	0.00029514	0.00852096	4.73864	0.768036	0.588693	2.36866	0.301899	0.207073	37.4328	11.264	24.1739	41.8158
ENSG00000180921.6_2	FAM83H	chr8:144806103-144815971	-	protein_coding	3.96198	15.5838	1.61307e-05	0.00319909	4.47022	0.508239	0.347386	1.34673	0.173861	0.102578	28.3497	19.9733	24.2414	14.5344
ENSG00000196878.14_3	LAMB3	chr1:209788215-209825811	-	protein_coding	3.95568	15.5159	0.00688753	0.0383736	6.16193	2.20626	21.8216	5.07756	0.567117	1.08651	33.7918	135.895	99.8017	53.749
ENSG00000117724.12_2	CENPF	chr1:214776538-214837931	+	protein_coding	3.90699	15.001	0.000100686	0.00582129	5.44134	1.53435	1.75761	3.92562	1.20527	1.35014	29.1291	54.6206	27.4773	73.6982
ENSG00000197153.4_3	HIST1H3J	chr6:27858160-27860884	-	protein_coding	3.90668	14.9978	0.00263052	0.0232916	4.05648	0.149801	0.21008	0.232699	0.0155628	0	3.01146	38.2629	38.2399	11.4016
ENSG00000148773.13_3	MKI67	chr10:129894923-129924649	-	protein_coding	3.90104	14.9393	7.14052e-05	0.00529037	4.81433	0.91329	0.342478	2.78462	0.572644	0.574529	19.7373	31.7951	22.0831	38.9185
ENSG00000046604.12_2	DSG2	chr18:29078006-29128971	+	protein_coding	3.88906	14.8157	0.000834366	0.0130826	5.69422	1.80516	5.1206	4.38876	1.27012	0.992068	31.2168	124.373	29.8044	56.7605
ENSG00000143217.8_3	NECTIN4	chr1:161040785-161059389	-	protein_coding	3.88538	14.778	0.000194284	0.00736796	4.59292	0.707541	0.434343	3.2142	0.122746	0.047889	17.9868	26.4941	25.688	23.3454
ENSG00000118785.13_3	SPP1	chr4:88896802-88904578	+	protein_coding	3.88344	14.7582	0.010456	0.0489235	6.50962	2.62618	10.4472	6.66667	3.51601	2.66585	157.748	134.223	263.307	11.1478
ENSG00000086570.12_2	FAT2	chr5:150883654-150948505	-	protein_coding	3.87784	14.701	0.000166749	0.00695097	4.21164	0.333799	0.221693	0.902372	0.0112307	0.0735608	10.0922	13.4021	41.4107	16.3943
ENSG00000068078.17_3	FGFR3	chr4:1795034-1810599	+	protein_coding	3.87635	14.6858	0.0013049	0.0163937	4.58059	0.704238	0.611597	1.78123	0.281464	0.226837	34.709	5.83983	48.7384	25.9812
ENSG00000178934.4_2	LGALS7B	chr19:39279851-39282389	+	protein_coding	3.84646	14.3847	0.0024082	0.0221947	4.01883	0.172366	0.176962	0.25115	0	0.0951603	26.802	2.51543	17.7571	36.6641
ENSG00000147697.8_2	GSDMC	chr8:130760442-130799134	-	protein_coding	3.84094	14.3297	0.00270497	0.0235893	4.11167	0.270738	0.0775525	0.762794	0.11522	0	15.5323	3.8945	63.8243	16.0282
ENSG00000115884.10_2	SDC1	chr2:20400558-20425194	-	protein_coding	3.84077	14.328	0.000115736	0.00600127	5.24596	1.40519	1.04461	4.96821	1.23032	0.807981	43.1029	26.6732	47.0971	34.3278
ENSG00000173801.16_3	JUP	chr17:39910856-39943183	-	protein_coding	3.83801	14.3007	1.66473e-05	0.00321107	5.64405	1.80604	3.20855	4.67445	1.1656	1.89103	48.8833	44.2515	52.8068	50.486
ENSG00000261116.1_3	AL049555.1	chr6:54807965-54809897	+	sense_overlapping	3.82011	14.1243	4.66568e-05	0.00488357	4.05959	0.239485	0.289168	0.228511	0.226537	0	13.0266	8.21494	28.3548	19.3757
ENSG00000134755.14_3	DSC2	chr18:28638806-28682378	-	protein_coding	3.80847	14.0108	0.00353514	0.0268131	5.50985	1.70138	2.6931	7.98758	0.704444	0.977177	31.344	15.059	87.0855	93.2106
ENSG00000178919.8_2	FOXE1	chr9:100615536-100618997	+	protein_coding	3.78407	13.7759	0.000370843	0.00919913	3.93106	0.14699	0.149028	0.076681	0.119132	0.085661	39.5967	5.94949	12.0509	13.7024
ENSG00000176153.11_2	GPX2	chr14:65405870-65409623	-	protein_coding	3.74401	13.3986	0.000423358	0.00975289	3.99918	0.255166	0	0.701748	0.192217	0	14.0522	41.9415	10.8052	7.56923
ENSG00000196747.4_2	HIST1H2AI	chr6:27775977-27776479	+	protein_coding	3.73963	13.358	0.000516787	0.0104172	5.40483	1.6652	4.19804	2.90995	0.971149	1.52564	36.4933	68.0536	17.1398	67.5951
ENSG00000115221.10_2	ITGB6	chr2:160956177-161128399	-	protein_coding	3.73606	13.325	0.000555801	0.0107941	3.98581	0.249742	0.243382	0.400071	0.0378412	0.106201	6.40169	15.0064	44.1517	10.7785
ENSG00000083307.10_3	GRHL2	chr8:102504660-102681954	+	protein_coding	3.71908	13.1691	1.8235e-05	0.00339125	4.01213	0.293049	0.0736879	0.883053	0.0688591	0.0428085	21.3286	18.661	10.7789	12.1074
ENSG00000143556.8_2	S100A7	chr1:153430220-153433177	-	protein_coding	3.71507	13.1325	0.0465367	0.122734	4.71018	0.995108	3.05475	1.52701	0	0.54049	13.1944	1.62213	43.4364	282.864
ENSG00000029153.14_3	ARNTL2	chr12:27485787-27578222	+	protein_coding	3.70134	13.0081	0.000344526	0.00905206	4.86225	1.16091	1.5354	1.79246	0.99384	0.770735	12.9616	20.8798	66.5927	33.6622
ENSG00000135373.12_2	EHF	chr11:34642640-34682604	+	protein_coding	3.67651	12.7862	0.0144781	0.059138	4.94163	1.26512	1.21017	7.89328	0.430778	0.18656	61.5772	44.3683	4.22076	59.1744
ENSG00000137673.8_2	MMP7	chr11:102391239-102401484	-	protein_coding	3.66466	12.6816	0.0132163	0.0560021	3.86934	0.204682	0.0977835	0.524432	0	0.0539918	43.3669	52.228	6.28464	1.65182
ENSG00000151632.17_3	AKR1C2	chr10:5029592-5060223	-	protein_coding	3.65343	12.5832	0.0195669	0.071293	5.60955	1.95612	9.38834	3.37371	1.07032	1.40976	59.7935	150.504	98.6063	5.19444
ENSG00000205076.4_3	LGALS7	chr19:39261611-39264132	-	protein_coding	3.64098	12.4751	0.00253191	0.0228526	3.81158	0.170596	0	0.604789	0	0	17.8379	2.25167	21.8179	26.8088
ENSG00000165272.14_2	AQP3	chr9:33441152-33447609	-	protein_coding	3.61944	12.2902	0.000521092	0.0104597	4.18262	0.563179	0.336188	1.50998	0.217	0.167636	20.2055	15.6113	6.97882	37.689
ENSG00000169245.5_2	CXCL10	chr4:76942270-76944650	-	protein_coding	3.60874	12.1994	0.0397493	0.111271	4.50609	0.897354	2.53278	0.541204	0.537887	0.437543	4.20248	4.58376	33.1316	267.892
ENSG00000138180.15_2	CEP55	chr10:95256389-95288849	+	protein_coding	3.60391	12.1587	8.53985e-05	0.00559742	4.23664	0.632733	0.571353	1.41987	0.150364	0.321252	10.6512	30.79	15.0313	20.2715
ENSG00000273703.1_2	HIST1H2BM	chr6:27782822-27783202	+	protein_coding	3.5722	11.8943	0.000282482	0.00834897	4.04294	0.470745	0.697937	0.806828	0.064194	0.129729	10.3827	26.1795	7.63766	26.6252
ENSG00000089356.18_4	FXYD3	chr19:35606783-35615228	+	protein_coding	3.56884	11.8666	1.05049e-05	0.00276635	4.07459	0.505752	0.520182	0.792543	0.233984	0.208681	16.1103	21.6341	9.81236	18.2467
ENSG00000137699.16_1	TRIM29	chr11:119981983-120056237	-	protein_coding	3.56834	11.8625	0.000126	0.00622349	4.14201	0.573669	0.376411	1.89084	0.120574	0.100407	23.6077	14.0538	10.833	21.1649
ENSG00000169594.13_3	BNC1	chr15:83924655-83953466	-	protein_coding	3.53565	11.5968	0.000107778	0.0059213	3.87299	0.33734	0.357214	0.371173	0.108482	0.235176	13.1063	8.12091	30.3689	10.4182
ENSG00000006453.13_3	BAIAP2L1	chr7:97920963-98030380	-	protein_coding	3.52443	11.5069	1.37655e-05	0.00293336	4.48194	0.957517	0.999389	1.82171	0.606365	0.569322	28.3308	19.8601	24.6244	14.9039
ENSG00000274641.1_2	HIST1H2BO	chr6:27861241-27861621	+	protein_coding	3.51773	11.4536	0.000377019	0.00928032	4.15625	0.638525	1.25344	1.09331	0.011432	0.230962	12.5019	24.2096	8.41841	30.5276
ENSG00000275379.1_2	HIST1H3I	chr6:27839683-27840093	-	protein_coding	3.51022	11.3941	0.00691919	0.0384447	5.25466	1.74444	5.04956	2.33969	1.63199	1.37025	34.8597	78.5243	6.87476	93.5998
ENSG00000175063.16_2	UBE2C	chr20:44441215-44445596	+	protein_coding	3.509	11.3845	0.000580636	0.0110826	3.973	0.464	0.849996	0.781809	0	0.0981967	8.05593	37.9755	9.19378	15.9008
ENSG00000198729.4_2	PPP1R14C	chr6:150464212-150571493	+	protein_coding	3.50467	11.3504	0.00230588	0.0217698	3.90977	0.405107	0.368717	0.738543	0.091544	0.183742	14.1959	2.97675	28.7616	27.3743
ENSG00000180730.4_2	SHISA2	chr13:26618735-26625169	-	protein_coding	3.50228	11.3316	0.00785652	0.0414012	3.79511	0.292826	0.237999	0.328512	0.067125	0.283206	6.37358	13.4971	3.52105	75.8359
ENSG00000179869.14_3	ABCA13	chr7:48211055-48687092	+	protein_coding	3.50028	11.3159	1.78523e-06	0.00208233	3.64413	0.143847	0.228079	0.144063	0.0488664	0.0111443	12.093	15.6569	8.02324	11.4157
ENSG00000062038.13_3	CDH3	chr16:68670092-68756519	+	protein_coding	3.49798	11.2979	0.000154991	0.00682235	3.80266	0.30468	0.253206	0.359358	0.194353	0.143885	10.2359	7.12616	30.0946	12.3561
ENSG00000074410.13_2	CA12	chr15:63613577-63674360	-	protein_coding	3.49117	11.2447	0.000569584	0.0109609	4.28251	0.791338	1.05082	1.18203	0.20457	0.664357	13.5673	22.9603	43.7594	8.18116
ENSG00000149418.10_2	ST14	chr11:130029457-130080271	+	protein_coding	3.48348	11.1849	6.42372e-05	0.00515164	4.20544	0.721954	0.92479	1.76635	0.176993	0.18101	15.1504	21.7353	12.5744	22.2405
ENSG00000088325.15_2	TPX2	chr20:30327074-30389608	+	protein_coding	3.47547	11.1229	0.00115558	0.0153959	4.74749	1.27203	1.2025	4.10306	0.693593	0.786971	15.0778	58.1927	14.2832	34.7967
ENSG00000134709.10_2	HOOK1	chr1:60280458-60342050	+	protein_coding	3.45433	10.9612	1.18042e-05	0.00284	4.02441	0.570079	0.29033	1.40488	0.22715	0.275707	18.8384	13.1648	13.1431	16.6445
ENSG00000100558.8_2	PLEK2	chr14:67853700-67878917	-	protein_coding	3.4392	10.8468	0.00169254	0.0186738	3.97721	0.538017	0.619012	1.21285	0	0.240611	3.78918	29.7179	18.947	19.9658
ENSG00000117394.20_2	SLC2A1	chr1:43391046-43424844	-	protein_coding	3.43407	10.8083	0.00233016	0.0218788	5.28771	1.85363	8.19658	2.03097	1.33175	1.62486	31.7683	38.976	97.0216	17.1325
ENSG00000126787.12_3	DLGAP5	chr14:55614830-55658396	-	protein_coding	3.43383	10.8066	0.000362528	0.00911052	3.79712	0.363281	0.423687	0.508641	0.0474877	0.216984	7.92211	31.4704	7.08189	14.9483
ENSG00000101311.15_2	FERMT1	chr20:6055492-6104191	-	protein_coding	3.43246	10.7963	0.000103028	0.00582129	4.25635	0.823894	0.477121	2.16301	0.45789	0.441536	18.2737	25.2618	21.761	10.5793
ENSG00000104413.15_3	ESRP1	chr8:95653302-95719694	+	protein_coding	3.42476	10.7388	0.000135776	0.00646592	3.999	0.574235	0.320505	1.8079	0.152118	0.150347	18.3657	19.2256	8.55505	16.4625
ENSG00000149573.8_2	MPZL2	chr11:118124118-118135251	-	protein_coding	3.41878	10.6943	0.00012215	0.00612806	4.72474	1.30596	1.84462	2.76885	1.32288	0.500642	25.425	32.4108	14.537	34.6356
ENSG00000154639.18_2	CXADR	chr21:18884700-18965897	+	protein_coding	3.41138	10.6397	4.41983e-06	0.00241204	4.03283	0.621441	0.180234	1.27535	0.273267	0.638149	16.0539	16.472	14.9554	14.0984
ENSG00000058085.14_2	LAMC2	chr1:183155373-183214035	+	protein_coding	3.39921	10.5503	0.00290212	0.0244018	6.23179	2.83258	2.49367	8.00462	5.34032	11.9094	25.2668	96.6406	177.039	68.8661
ENSG00000158769.17_3	F11R	chr1:160965001-160991138	-	protein_coding	3.38627	10.4561	0.000427844	0.00979398	5.24264	1.85637	7.63295	3.07443	1.11457	1.31121	29.2856	45.631	38.1089	36.2032
ENSG00000124466.8_2	LYPD3	chr19:43964939-43969812	-	protein_coding	3.36598	10.3101	0.00466227	0.0307814	4.54769	1.18171	0.463337	7.39981	0.538937	0.399849	22.6858	9.10854	28.3786	41.5358
ENSG00000102554.13_2	KLF5	chr13:73629114-73651680	+	protein_coding	3.31935	9.98214	0.00177739	0.0190283	5.88828	2.56893	12.4146	9.1954	2.68629	1.45883	52.4979	78.7961	39.6039	70.0082
ENSG00000278463.1_2	HIST1H2AB	chr6:26033404-26033796	-	protein_coding	3.30077	9.85442	0.00135552	0.0166749	5.43165	2.13088	4.35763	3.06218	2.35977	4.03255	31.0481	80.2632	15.2614	80.9407
ENSG00000181449.3_4	SOX2	chr3:181429712-181432224	+	protein_coding	3.29589	9.82116	0.00341679	0.0264009	5.05738	1.76149	2.91918	7.10519	1.33956	0.778094	70.2173	28.6759	12.1674	43.1784
ENSG00000284681.1_1	AC007240.1	chr2:10262866-10339414	+	protein_coding	3.29571	9.81988	0.000450269	0.00999892	3.44625	0.150546	0.056319	0.402932	0.024339	0	3.82586	10.3589	10.1289	22.1387
ENSG00000109062.11_3	SLC9A3R1	chr17:72744791-72765492	+	protein_coding	3.28524	9.74892	0.000253401	0.00814223	4.68873	1.40348	1.51771	4.16476	1.30612	0.633154	31.5423	33.9408	15.5647	22.4868
ENSG00000112378.11_2	PERP	chr6:138409642-138428648	-	protein_coding	3.27699	9.69335	0.000417831	0.00970688	7.66891	4.39191	9.69102	37.1986	17.1966	25.1415	200.247	123.052	269.254	253.2
ENSG00000075275.16_3	CELSR1	chr22:46756731-46933067	-	protein_coding	3.26476	9.61151	0.000199655	0.00743307	3.89192	0.627157	0.386147	1.17514	0.319526	0.430402	7.62847	24.706	19.2717	9.80143
ENSG00000170312.15_2	CDK1	chr10:62538089-62554610	+	protein_coding	3.25043	9.51648	5.84054e-05	0.0050849	3.7778	0.527371	0.407471	0.919439	0.206404	0.32407	10.028	20.4962	7.81492	15.9375
ENSG00000138755.5_2	CXCL9	chr4:76922428-76928641	-	protein_coding	3.24849	9.50374	0.0491005	0.126982	4.50387	1.25538	3.6491	0.624353	0.668857	1.57726	4.02313	5.16129	39.0762	212.634
ENSG00000164932.12_2	CTHRC1	chr8:104383743-104395225	+	protein_coding	3.24115	9.45551	0.0109783	0.0501325	5.06046	1.81931	7.56414	2.66322	0.891365	1.61423	84.6344	55.7669	32.2573	6.66964
ENSG00000110400.10_3	NECTIN1	chr11:119494120-119599794	-	protein_coding	3.23722	9.42974	7.6024e-06	0.00271703	3.71581	0.478596	0.586599	0.845508	0.117117	0.152405	14.4395	14.7736	10.1078	10.0178
ENSG00000184731.5_2	FAM110C	chr2:38814-46870	-	protein_coding	3.23054	9.38621	8.91774e-05	0.00562156	3.54789	0.317346	0.527879	0.319366	0.115135	0.072362	10.1953	6.601	21.1279	8.93653
ENSG00000053747.15_3	LAMA3	chr18:21269407-21535030	+	protein_coding	3.22776	9.3681	0.00367748	0.0273614	5.26126	2.0335	2.89162	3.66939	2.64733	3.2385	9.43526	46.7301	39.564	106.09
ENSG00000092853.13_2	CLSPN	chr1:36185819-36235568	-	protein_coding	3.22079	9.32297	0.000483444	0.0101283	3.992	0.771213	0.682495	1.9418	0.240429	0.381958	10.542	33.1635	9.82336	14.0191
ENSG00000186193.8_2	SAPCD2	chr9:139956576-139965040	-	protein_coding	3.21684	9.2975	8.99073e-05	0.00562156	3.48906	0.272213	0.251234	0.213767	0.322502	0.059026	19.4708	10.7841	9.10767	5.51868
ENSG00000249395.2_2	CASC9	chr8:76135639-76236976	-	lincRNA	3.21656	9.29565	0.0266446	0.086653	3.82303	0.606471	0.192894	1.15913	0.798837	0.159823	28.7814	39.4206	0.552004	20.4754
ENSG00000138160.5_2	KIF11	chr10:94353043-94415152	+	protein_coding	3.21632	9.29412	4.27202e-05	0.00480333	4.22906	1.01275	1.0087	1.58059	0.639629	0.950235	13.6274	24.839	11.576	25.0204
ENSG00000188910.7_2	GJB3	chr1:35246790-35251970	+	protein_coding	3.21191	9.26579	9.16333e-06	0.00271703	3.40594	0.19403	0.0938626	0.370098	0.103446	0.0355482	7.07878	12.8444	12.6179	7.28777
ENSG00000231566.1_3	AC234772.2	chrX:45707509-45710920	-	lincRNA	3.20606	9.22827	0.00176191	0.0189782	4.05344	0.847377	0.913157	2.54974	0	0.543109	38.5285	16.7815	11.1682	7.88629
ENSG00000116133.11_2	DHCR24	chr1:55315306-55352891	-	protein_coding	3.18757	9.11073	0.00102019	0.014494	5.32034	2.13277	7.36374	7.05537	1.41316	1.27531	41.7141	41.45	30.0009	44.3421
ENSG00000131746.12_2	TNS4	chr17:38632080-38657849	-	protein_coding	3.18616	9.10186	0.000148167	0.00670673	3.4336	0.247441	0.151309	0.416336	0.153177	0.0560756	7.08666	7.11189	22.006	8.03105
ENSG00000265190.6_3	ANXA8	chr10:48255204-48279200	+	protein_coding	3.18603	9.10102	0.000217086	0.00763727	3.62117	0.435143	0.208159	1.13341	0.144972	0.132326	12.376	6.89957	21.8839	8.48121
ENSG00000170373.8_2	CST1	chr20:23728190-23731905	-	protein_coding	3.17201	9.01304	0.0131427	0.0558296	3.41081	0.238795	0.75081	0.107384	0	0	44.7247	10.654	9.76563	1.23028
ENSG00000101057.15_2	MYBL2	chr20:42295659-42345136	+	protein_coding	3.17143	9.00936	0.000469604	0.0100238	3.62054	0.449116	0.458676	0.628864	0.148234	0.273254	5.30719	24.874	7.94755	14.6734
ENSG00000104892.16_2	KLC3	chr19:45836692-45854778	+	protein_coding	3.16845	8.99078	1.03035e-05	0.00276635	3.60843	0.439985	0.482498	0.987416	0.0403439	0.10493	12.7593	10.6981	12.3229	9.31991
ENSG00000011052.21_3	NME1-NME2	chr17:49230951-49249105	+	protein_coding	3.15542	8.90999	0.0143265	0.0587725	5.88511	2.72968	18.8635	1.25117	1.5274	16.1289	48.0734	122.826	44.982	42.6647
ENSG00000203811.1_2	HIST2H3C	chr1:149811110-149812765	-	protein_coding	3.14255	8.83086	0.0013955	0.0169146	3.91702	0.774466	1.27688	0.956702	0.475753	0.302179	6.43271	33.4915	7.93668	21.7262
ENSG00000278272.1_2	HIST1H3C	chr6:26045639-26046049	+	protein_coding	3.1391	8.80973	0.00799364	0.0417663	5.52426	2.38516	7.21124	5.05522	1.96051	4.05962	38.3712	38.9878	14.373	184.357
ENSG00000167642.12_4	SPINT2	chr19:38734675-38783254	+	protein_coding	3.11867	8.68588	2.19556e-05	0.00361265	3.93918	0.820503	1.52851	1.13501	0.301347	0.384606	14.1402	12.2576	13.2077	18.4142
ENSG00000104267.9_2	CA2	chr8:86376081-86393722	+	protein_coding	3.11632	8.67174	0.0216493	0.0762867	3.98209	0.865767	2.59167	0.663855	0.408063	0.310549	2.84199	70.7299	29.1121	6.51476
ENSG00000134028.14_2	ADAMDEC1	chr8:24241798-24263526	+	protein_coding	3.10176	8.58467	0.00104087	0.01468	3.32164	0.219875	0.0704342	0.313861	0.119834	0.168135	15.0665	2.86945	7.476	17.9622
ENSG00000167644.11_3	C19orf33	chr19:38794801-38795649	+	protein_coding	3.07733	8.44051	0.00442086	0.030062	6.00067	2.92334	9.60741	19.5172	1.99503	4.0807	69.6009	99.4245	32.2124	70.3799
ENSG00000104549.11_2	SQLE	chr8:126010739-126034525	+	protein_coding	3.07665	8.43653	3.10668e-05	0.00418747	4.21744	1.14079	1.53108	1.91521	0.741813	0.839365	15.3252	19.3687	25.5913	12.5437
ENSG00000157456.7_3	CCNB2	chr15:59397277-59417244	+	protein_coding	3.0718	8.40822	0.000379378	0.0093124	3.50177	0.429971	0.611015	0.624722	0.164556	0.0806824	6.7876	22.9077	6.07648	11.4967
ENSG00000123975.4_2	CKS2	chr9:91926113-91931618	+	protein_coding	3.06173	8.34972	0.00146453	0.0173338	4.66778	1.60605	1.85215	3.5715	4.16395	0.275449	21.09	42.9848	26.3543	14.705
ENSG00000257084.1_4	MIR200CHG	chr12:7072409-7073610	+	lincRNA	3.05746	8.32504	0.000272395	0.00827246	3.78169	0.724235	0.752002	2.50695	0.212276	0	13.8838	13.3656	12.3887	11.4978
ENSG00000148346.11_3	LCN2	chr9:130911350-130915734	+	protein_coding	3.0536	8.30279	0.0124369	0.0541229	4.83822	1.78462	4.19249	9.32669	0.670443	0.573009	48.0445	34.3679	8.06808	41.5678
ENSG00000164687.10_2	FABP5	chr8:82192598-82197012	+	protein_coding	3.04406	8.24808	0.00152119	0.0177551	7.67458	4.63052	31.5119	33.5098	16.0951	18.6266	76.5877	234.227	382.71	247.789
ENSG00000109805.9_2	NCAPG	chr4:17812525-17846485	+	protein_coding	3.03892	8.21877	0.00012079	0.00610083	3.61096	0.572038	0.724321	0.947356	0.15174	0.262944	7.63782	19.5636	7.98452	12.9647
ENSG00000275126.1_2	HIST1H4L	chr6:27840977-27841288	-	protein_coding	3.03734	8.20976	0.0200572	0.0724772	5.61765	2.58031	14.9598	5.43737	2.03279	3.1061	50.0279	126.21	8.95244	88.9642
ENSG00000117650.12_2	NEK2	chr1:211831999-211848972	-	protein_coding	3.02058	8.11496	0.00372727	0.0275149	3.3081	0.287512	0.303986	0.454793	0.0956946	0.0676639	3.36538	27.0502	4.00973	14.6881
ENSG00000133110.14_2	POSTN	chr13:38136720-38172981	-	protein_coding	3.01937	8.10815	0.030746	0.0945624	6.19202	3.17265	12.004	8.91514	6.92756	5.46751	263.862	87.0932	133.056	8.13458
ENSG00000143061.17_3	IGSF3	chr1:117117021-117210377	-	protein_coding	3.01899	8.10601	6.99422e-06	0.00271703	4.28135	1.26236	1.06561	1.94422	1.16589	1.51403	15.3695	14.6714	25.3779	20.1287
ENSG00000114346.13_2	ECT2	chr3:172468472-172539264	+	protein_coding	3.00296	8.01641	0.000615525	0.0113633	4.65536	1.6524	1.58798	4.20298	1.47365	1.93183	15.2785	48.3572	15.402	29.602
ENSG00000275713.2_2	HIST1H2BH	chr6:26251879-26253938	+	protein_coding	2.99699	7.98333	0.000897038	0.0135069	3.53481	0.537821	0.626831	0.584958	0.188338	0.449774	8.99685	23.5061	4.01928	13.6743
ENSG00000168078.9_2	PBK	chr8:27667137-27695612	-	protein_coding	2.99452	7.96965	0.000664474	0.0117997	3.17554	0.18102	0.454111	0.0860661	0.0459621	0	3.81268	19.8445	6.02026	8.46224
ENSG00000147689.16_3	FAM83A	chr8:124191200-124222319	+	protein_coding	2.98543	7.91963	6.39945e-05	0.00515164	3.44084	0.455402	0.414107	1.0874	0.130314	0.059429	8.22308	12.0898	6.8924	13.5936
ENSG00000072571.19_3	HMMR	chr5:162887209-162918951	+	protein_coding	2.98189	7.90023	0.00141539	0.0170817	3.50992	0.528026	0.720944	0.688874	0.165902	0.275795	4.31677	28.8236	9.93658	8.71127
ENSG00000171517.5_2	LPAR3	chr1:85277285-85358896	-	protein_coding	2.97779	7.87781	3.80702e-05	0.00448327	3.12563	0.14784	0.212906	0.192481	0.0416893	0	5.91995	11.2498	10.6912	4.85525
ENSG00000086548.8_3	CEACAM6	chr19:42254885-42276113	+	protein_coding	2.97143	7.84312	0.012982	0.0554634	3.9114	0.939971	0.974663	4.487	0.184425	0.0556057	17.5387	15.0407	3.3906	38.2615
ENSG00000181885.18_3	CLDN7	chr17:7163222-7167302	-	protein_coding	2.96798	7.82439	0.00065097	0.0116503	3.95179	0.983809	1.29564	2.94106	0.205421	0.402714	21.8841	14.706	8.89218	15.1263
ENSG00000142273.10_2	CBLC	chr19:45281126-45303891	+	protein_coding	2.95973	7.77978	0.000118809	0.00607571	3.202	0.242271	0.099241	0.676292	0.062382	0	6.18765	14.8136	5.44979	8.78208
ENSG00000198759.11_3	EGFL6	chrX:13587724-13651694	+	protein_coding	2.95853	7.77331	0.000205844	0.00752104	3.32488	0.366352	0.347846	0.533856	0.0756957	0.241702	19.7685	7.0409	6.09612	7.50795
ENSG00000123485.11_3	HJURP	chr2:234742062-234763212	-	protein_coding	2.95522	7.75548	0.0015422	0.0178421	3.40043	0.445216	0.393608	1.14734	0.0772495	0.0659486	7.81695	25.7961	4.4121	8.72237
ENSG00000284292.1_2	AC004922.1	chr7:98923502-98992276	+	protein_coding	2.9514	7.73497	0.0025546	0.0229924	3.84344	0.892042	2.25539	0.429239	0.633805	0.560334	18.31	30.2838	4.55597	11.6503
ENSG00000145824.12_2	CXCL14	chr5:134906369-134914969	-	protein_coding	2.95116	7.73369	0.0322969	0.0973624	6.20653	3.25537	38.4933	5.22237	2.52357	8.60277	146.901	23.4227	217.591	36.6712
ENSG00000213886.3_3	UBD	chr6:29523292-29527702	-	protein_coding	2.95101	7.7329	0.0314575	0.0958074	4.89929	1.94828	3.28005	4.17903	2.02657	2.30608	14.3247	5.79775	37.7027	195.713
ENSG00000090889.11_2	KIF4A	chrX:69509940-69640682	+	protein_coding	2.949	7.72215	0.000571218	0.0109609	3.47518	0.526175	0.348465	0.871428	0.321071	0.290147	5.54481	22.1385	6.2547	12.9213
ENSG00000196139.13_3	AKR1C3	chr10:5077546-5149878	+	protein_coding	2.94285	7.68929	0.0108997	0.0499917	4.75064	1.80779	6.14321	2.61892	1.23705	1.59806	22.6075	79.961	35.8907	6.44899
ENSG00000118193.11_2	KIF14	chr1:200520625-200589862	-	protein_coding	2.94002	7.67423	0.00041226	0.00964486	3.33848	0.398455	0.635751	0.450753	0.0476064	0.214169	4.50429	14.5855	6.40979	15.4702
ENSG00000123500.9_3	COL10A1	chr6:116440086-116479910	-	protein_coding	2.93883	7.66792	0.0102104	0.0481571	3.07519	0.136352	0.161106	0.0245383	0.139073	0.0770412	36.068	4.2277	8.30538	1.79801
ENSG00000171903.16_2	CYP4F11	chr19:16023177-16045677	-	protein_coding	2.93754	7.66103	0.0108729	0.0499245	3.15034	0.212803	0.0411825	0.592763	0	0.0878322	7.64089	13.3207	24.5616	0.96461
ENSG00000069812.11_2	HES2	chr1:6472478-6484730	-	protein_coding	2.92603	7.60016	0.000609058	0.0112999	3.05183	0.1258	0.0636612	0.145309	0.163462	0	9.32093	2.92837	15.8187	5.935
ENSG00000155066.15_2	PROM2	chr2:95940201-95957056	+	protein_coding	2.91745	7.5551	5.6758e-05	0.00503952	3.56645	0.649002	0.223263	1.32932	0.48129	0.432475	10.3619	7.63352	16.5511	10.4418
ENSG00000188293.5_2	IGFL1	chr19:46733009-46734500	+	protein_coding	2.91633	7.54925	0.00197828	0.0201122	3.22759	0.311252	0	1.13609	0	0.1096	3.07597	7.50999	9.33499	20.4749
ENSG00000136943.10_2	CTSV	chr9:99791961-99801925	-	protein_coding	2.91312	7.53246	0.000242159	0.00797396	3.23736	0.324237	0.277032	0.455948	0.210077	0.0920937	7.51934	6.98157	18.4627	4.97683
ENSG00000184661.13_2	CDCA2	chr8:25316513-25365436	+	protein_coding	2.90823	7.50695	0.00157691	0.0180905	3.13105	0.222822	0.043941	0.51883	0.0790957	0.0840735	3.77928	23.4084	5.17688	7.17499
ENSG00000133048.12_2	CHI3L1	chr1:203148059-203155877	-	protein_coding	2.90557	7.49316	0.0343093	0.101171	3.61208	0.706506	2.44829	0.256823	0.252361	0.306504	37.6762	0.619974	16.8387	19.0016
ENSG00000124575.6_2	HIST1H1D	chr6:26234496-26235161	-	protein_coding	2.89529	7.43995	0.00476409	0.03121	6.27739	3.3821	9.05634	4.71742	9.24328	19.0619	37.361	114.297	42.8397	185.704
ENSG00000272141.1_3	AL390719.2	chr1:1104737-1105723	+	lincRNA	2.89178	7.42188	0.000421939	0.00974556	3.12439	0.232602	0	0.69094	0	0.127075	10.1501	14.4313	6.05274	3.76538
ENSG00000101384.11_2	JAG1	chr20:10618332-10654755	-	protein_coding	2.88489	7.3865	0.00251649	0.0227777	5.44466	2.55977	11.4305	5.57124	2.70967	2.98845	31.4796	63.7771	75.4358	21.3718
ENSG00000051341.13_2	POLQ	chr3:121150274-121265488	-	protein_coding	2.8846	7.38501	6.09614e-05	0.00515164	3.13069	0.246095	0.158903	0.402606	0.103487	0.103004	6.59562	12.0687	4.46257	9.85274
ENSG00000186891.13_3	TNFRSF18	chr1:1138888-1142071	-	protein_coding	2.88082	7.36569	0.00211149	0.0208131	3.27852	0.397698	0.289732	0.733437	0.347314	0	5.95145	27.7333	4.46809	7.1177
ENSG00000182481.8_3	KPNA2	chr17:66031635-66042958	+	protein_coding	2.87908	7.3568	0.00187921	0.0195933	4.84067	1.96159	3.24124	3.80309	2.32502	2.39766	13.9792	78.3941	18.1143	28.6556
ENSG00000166145.14_3	SPINT1	chr15:41136216-41150405	+	protein_coding	2.8738	7.32993	0.00142777	0.0171624	4.0171	1.1433	1.57948	3.93632	0.438711	0.299443	22.0653	9.3001	13.1522	19.438
ENSG00000137804.12_3	NUSAP1	chr15:41624892-41673248	+	protein_coding	2.87022	7.31175	0.000218563	0.00767715	4.08781	1.21759	1.47216	3.00772	0.695044	0.741687	11.5298	22.8151	12.8678	19.2026
ENSG00000167600.13_2	CYP2S1	chr19:41698954-41713444	+	protein_coding	2.86544	7.28758	0.000110734	0.0059213	3.2063	0.340862	0.365865	0.388235	0.199346	0.131419	13.1575	11.5997	5.8973	4.89859
ENSG00000121152.9_3	NCAPH	chr2:97001525-97039583	+	protein_coding	2.85652	7.24265	0.000605948	0.011289	3.45399	0.597472	0.619818	0.949895	0.34894	0.230148	5.89578	18.3093	5.54295	15.5537
ENSG00000123892.11_3	RAB38	chr11:87846410-87908635	-	protein_coding	2.83834	7.15196	3.90984e-05	0.0044863	4.21366	1.37532	1.74314	2.78603	1.49604	0.747313	15.468	22.8534	14.9238	17.9459
ENSG00000124107.5_2	SLPI	chr20:43880880-43883205	-	protein_coding	2.82061	7.06463	0.0342191	0.101009	6.23128	3.41067	41.9004	10.271	2.99512	5.62058	44.7603	209.194	22.6645	138.96
ENSG00000130208.9_3	APOC1	chr19:45417504-45422606	+	protein_coding	2.80606	6.99374	0.00580029	0.034942	3.70953	0.903471	3.38116	0.68096	0.383679	0.201452	28.3238	4.17866	15.4083	10.755
ENSG00000274997.1_2	HIST1H2AH	chr6:27114908-27115294	+	protein_coding	2.80382	6.98288	0.00145056	0.0172639	5.34129	2.53747	5.74834	7.32695	2.12252	5.47487	26.824	61.1347	21.8714	67.3142
ENSG00000167880.7_3	EVPL	chr17:74000583-74023533	-	protein_coding	2.79841	6.95672	0.0085563	0.0434318	4.52971	1.7313	2.24749	4.79732	2.48631	0.851645	61.3113	6.36013	30.2488	18.8624
ENSG00000278588.1_2	HIST1H2BI	chr6:26273204-26273584	+	protein_coding	2.79707	6.95029	0.0101078	0.047865	4.46414	1.66707	4.63426	2.10189	0.742188	2.34036	21.1206	32.3562	5.06813	52.0073
ENSG00000143228.12_3	NUF2	chr1:163236366-163325554	+	protein_coding	2.79397	6.93535	0.000884846	0.0134012	3.21989	0.425926	0.339901	0.680632	0.0975572	0.317933	3.90252	16.3083	5.30793	13.0792
ENSG00000273542.1_2	HIST1H4K	chr6:27798994-27799305	-	protein_coding	2.78716	6.90272	0.000189508	0.00728563	6.05907	3.2719	9.01923	12.2961	6.86402	7.30923	51.5223	79.7894	42.1843	106.85
ENSG00000254709.7_3	IGLL5	chr22:23229960-23238287	+	protein_coding	2.78521	6.89337	0.0127966	0.0550241	3.66051	0.875296	1.48995	1.06658	0.655691	0.329045	11.4263	2.58351	10.7413	47.9015
ENSG00000130203.9_3	APOE	chr19:45409011-45412650	+	protein_coding	2.77824	6.86013	0.015814	0.0624005	6.40519	3.62696	48.2556	7.37345	10.9147	3.74076	146.362	36.1445	90.1805	102.38
ENSG00000137563.11_2	GGH	chr8:63927638-63951730	-	protein_coding	2.77684	6.85349	0.00787524	0.0414235	4.43011	1.65327	2.918	4.40611	1.11294	1.18723	14.9684	75.8099	9.6372	15.5528
ENSG00000142945.12_2	KIF2C	chr1:45205490-45233439	+	protein_coding	2.77668	6.85273	0.000827551	0.0130545	3.54064	0.763964	0.552074	1.18568	0.569774	0.561594	6.47622	22.6867	5.7253	14.3979
ENSG00000183421.11_2	RIPK4	chr21:43159529-43187266	-	protein_coding	2.7762	6.85045	0.00166213	0.0185394	3.39101	0.614816	0.922699	1.20366	0.176509	0.103216	19.3875	5.70276	4.72046	14.4932
ENSG00000187689.9_2	AMTN	chr4:71384257-71398459	+	protein_coding	2.77596	6.84932	0.0192689	0.0706675	2.955	0.179035	0.164472	0.41075	0	0	27.4366	6.56605	9.67984	0.573466
ENSG00000189057.10_3	FAM111B	chr11:58874658-58894883	+	protein_coding	2.77315	6.83599	0.00126378	0.0161796	3.48236	0.709205	0.467704	1.88086	0.357156	0.245026	8.31796	19.8385	4.71184	13.0672
ENSG00000052344.15_2	PRSS8	chr16:31142754-31147083	-	protein_coding	2.77151	6.82823	3.74434e-05	0.00448049	3.24338	0.471867	0.460648	1.07818	0.111086	0.0970063	7.48837	7.04784	8.5179	11.3701
ENSG00000169679.14_3	BUB1	chr2:111395275-111435691	-	protein_coding	2.77086	6.82514	0.00082461	0.0130393	3.08481	0.313952	0.265138	0.568964	0.0670945	0.12741	4.18996	17.3209	4.38829	9.11391
ENSG00000189280.3_2	GJB5	chr1:35220648-35224113	+	protein_coding	2.76691	6.80651	5.64359e-07	0.00126275	2.84433	0.0774189	0	0.239429	0	0	4.95628	6.78342	6.08808	7.09551
ENSG00000132470.13_2	ITGB4	chr17:73717408-73753899	+	protein_coding	2.76	6.77396	0.00296524	0.0245639	5.21053	2.45053	9.28104	5.11517	3.05601	2.501	37.2786	77.6563	36.2674	15.7529
ENSG00000163082.9_2	SGPP2	chr2:223289236-223425667	+	protein_coding	2.75393	6.74553	0.000540842	0.0106059	3.02202	0.268092	0.034046	0.516214	0.140985	0.175534	8.67358	11.0628	2.61937	9.30889
ENSG00000198435.3_3	NRARP	chr9:140194934-140196703	-	protein_coding	2.74842	6.71981	0.000765561	0.0125398	3.59054	0.842125	1.78573	0.856609	0.293826	0.543423	10.0255	23.7714	9.38842	6.42248
ENSG00000159399.9_3	HK2	chr2:75061108-75120486	+	protein_coding	2.74685	6.7125	0.00215689	0.021056	4.49326	1.74641	6.43692	1.81549	1.63295	1.2988	15.4349	19.0959	46.8824	15.2697
ENSG00000273760.1_3	AC245041.1	chr10:47135135-47138586	-	lincRNA	2.74677	6.71212	0.000176346	0.00711813	2.93152	0.18475	0.212163	0.207234	0.131921	0.007609	8.09525	5.11463	12.1376	3.63657
ENSG00000184363.9_3	PKP3	chr11:392614-404908	+	protein_coding	2.74528	6.70522	0.000395521	0.00945114	3.16685	0.421566	0.339521	0.995024	0.0848439	0.110072	5.00221	7.85302	6.16913	16.0765
ENSG00000162366.7_2	PDZK1IP1	chr1:47649265-47656716	-	protein_coding	2.74292	6.69424	0.00101621	0.014455	3.34197	0.59905	1.84042	0.504322	0.137931	0.0826515	5.64227	7.21979	9.01815	18.3272
ENSG00000075618.17_2	FSCN1	chr7:5632454-5646286	+	protein_coding	2.74239	6.69179	0.000114725	0.00600127	4.28632	1.54393	3.1771	2.41441	1.31955	1.18514	15.4607	14.5067	28.8208	18.0438
ENSG00000256812.1_3	CAPNS2	chr16:55600584-55601599	+	protein_coding	2.73844	6.67348	0.033425	0.0994394	3.87642	1.13798	1.90996	3.04702	0.243695	0.601494	18.3816	1.25964	32.7661	30.4603
ENSG00000177508.11_2	IRX3	chr16:54317216-54320675	-	protein_coding	2.73793	6.6711	0.000139786	0.00655592	3.27605	0.538123	0.766537	0.912203	0.101053	0.195362	7.36011	6.03558	8.49562	14.7659
ENSG00000188373.4_2	C10orf99	chr10:85933494-85945050	+	protein_coding	2.73254	6.64624	0.0228397	0.0784765	2.80082	0.0682787	0	0.208414	0	0	5.65377	0.3065	9.83203	24.0399
ENSG00000237649.7_2	KIFC1	chr6:33359313-33377701	+	protein_coding	2.72552	6.614	0.000711586	0.012132	3.4955	0.769979	0.811943	1.25661	0.31651	0.570808	9.01796	11.9458	4.77316	20.6114
ENSG00000139044.10_3	B4GALNT3	chr12:569530-672675	+	protein_coding	2.72452	6.60942	0.00219015	0.0211806	3.41656	0.692042	0.799983	1.44503	0.287638	0.202139	11.6125	3.20444	19.0936	11.2008
ENSG00000137812.19_3	KNL1	chr15:40886218-40956540	+	protein_coding	2.71693	6.57472	8.67607e-06	0.00271703	3.17527	0.458341	0.713995	0.538221	0.179792	0.14568	6.58168	9.48089	6.82035	9.71558
ENSG00000267284.1_3	AC022031.2	chr18:53388294-53455992	+	lincRNA	2.71513	6.56652	0.000222769	0.00773984	2.78122	0.0660938	0.0765183	0.0513242	0	0.0612722	4.05312	6.27065	12.1939	3.60702
ENSG00000099194.5_2	SCD	chr10:102106881-102124591	+	protein_coding	2.70899	6.53865	0.0011384	0.0153074	5.76868	3.05969	13.5946	10.6945	3.36246	5.49125	53.8684	53.3555	34.9926	81.3016
ENSG00000198901.13_2	PRC1	chr15:91509268-91538859	-	protein_coding	2.70368	6.51461	0.000324978	0.00890009	4.0821	1.37842	1.19526	2.46987	1.27638	1.63474	10.1411	29.5944	11.2801	18.6592
ENSG00000151725.11_3	CENPU	chr4:185615772-185655287	-	protein_coding	2.70041	6.49985	0.00217816	0.0211437	3.61148	0.911071	1.11634	1.39532	0.409506	0.749941	7.4594	31.8633	5.90041	10.634
ENSG00000106462.10_3	EZH2	chr7:148504475-148581413	-	protein_coding	2.69331	6.46797	3.9851e-05	0.00452753	3.89068	1.19736	1.55124	2.16032	1.00439	0.71122	14.7272	10.3012	13.1154	18.2919
ENSG00000196787.3_2	HIST1H2AG	chr6:27100821-27103070	+	protein_coding	2.69251	6.46438	0.000644676	0.0116328	4.01957	1.32706	2.80007	1.39776	1.18249	0.992468	14.4904	22.453	7.13042	22.4246
ENSG00000152253.8_2	SPC25	chr2:169690642-169769881	-	protein_coding	2.68805	6.44441	0.000306045	0.00867314	2.96261	0.27456	0.285416	0.412386	0.107737	0.0645584	4.52722	13.3699	4.07325	8.16414
ENSG00000142632.16_3	ARHGEF19	chr1:16524349-16539104	-	protein_coding	2.67671	6.39398	4.96391e-05	0.00495641	3.04548	0.368763	0.295832	0.581602	0.120478	0.210558	10.7487	5.10716	5.37009	9.16592
ENSG00000163235.15_3	TGFA	chr2:70674412-70781325	-	protein_coding	2.6751	6.38683	0.000503009	0.0103066	3.44629	0.771193	1.66071	0.876796	0.31644	0.290605	5.58615	10.2258	9.25029	17.6279
ENSG00000145386.9_2	CCNA2	chr4:122737599-122745088	-	protein_coding	2.67147	6.37076	0.00204675	0.0204538	3.57346	0.90199	1.1543	1.07036	0.674897	0.632161	7.49763	28.0477	4.74569	13.1618
ENSG00000106278.11_2	PTPRZ1	chr7:121513143-121702090	+	protein_coding	2.66645	6.34865	0.00681444	0.0382015	4.10022	1.43377	1.3999	1.77728	2.46067	1.3092	50.6871	4.83691	18.2806	13.8756
ENSG00000129354.11_3	AP1M2	chr19:10683347-10697991	-	protein_coding	2.64228	6.24316	0.000304099	0.00864577	3.10368	0.461407	0.489153	1.26872	0.044944	0.0180658	7.77619	11.6214	4.78576	7.51989
ENSG00000164171.10_2	ITGA2	chr5:52285156-52390609	+	protein_coding	2.63962	6.23166	0.00100358	0.0143667	4.747	2.10739	1.6192	5.23883	3.95255	3.26034	14.5334	27.5419	22.1454	49.6692
ENSG00000109255.11_2	NMU	chr4:56461396-56502865	-	protein_coding	2.63694	6.22012	0.0106849	0.0494754	3.01956	0.382616	0	1.88879	0	0	7.77335	10.1498	1.46074	16.9644
ENSG00000173898.11_2	SPTBN2	chr11:66452719-66496697	-	protein_coding	2.63665	6.21885	0.000391304	0.00944492	4.07907	1.44242	0.954654	4.38809	1.30973	1.24274	22.616	13.358	14.1814	14.8516
ENSG00000165304.7_3	MELK	chr9:36572859-36677680	+	protein_coding	2.62468	6.16745	0.000235294	0.00786759	2.84756	0.22289	0.167365	0.507181	0	0.0544196	4.23677	9.45174	3.71592	9.39899
ENSG00000156970.12_3	BUB1B	chr15:40453224-40513337	+	protein_coding	2.62323	6.16126	4.19016e-05	0.00473509	3.17775	0.554527	0.417983	1.10084	0.253509	0.246025	6.05976	10.6092	6.73358	9.5785
ENSG00000158315.10_2	RHBDL2	chr1:39351479-39407471	-	protein_coding	2.61844	6.14087	0.00390102	0.0281333	3.2459	0.627458	0.443373	1.66542	0.272682	0.163246	14.5256	12.7035	2.35404	10.3502
ENSG00000205413.7_3	SAMD9	chr7:92728826-92747336	-	protein_coding	2.61766	6.13752	0.0223952	0.0775805	5.8002	3.18254	18.5775	16.3484	3.13427	3.83892	99.9566	14.9138	63.237	92.4205
ENSG00000186395.7_3	KRT10	chr17:38974369-38978847	-	protein_coding	2.60731	6.09368	0.00183079	0.0193332	4.09493	1.48762	2.71651	1.71775	1.02809	2.01884	12.427	17.3136	7.79	38.4502
ENSG00000261040.6_2	WFDC21P	chr17:58160927-58169246	-	processed_transcript	2.60678	6.09141	0.00837564	0.0429495	3.11417	0.507391	0.249815	0.784174	0.173973	0.55962	13.6773	4.23905	2.1559	22.1637
ENSG00000137807.13_2	KIF23	chr15:69706585-69740766	+	protein_coding	2.60614	6.08874	0.00173192	0.0188174	3.4466	0.840454	0.38298	1.45676	0.645662	0.838602	6.1774	23.0703	5.0708	12.4717
ENSG00000189143.9_3	CLDN4	chr7:73213872-73247023	+	protein_coding	2.59867	6.05729	0.00123912	0.0159985	2.91509	0.316422	0.350532	0.626812	0.0211624	0.0716991	16.4982	5.9435	3.42194	5.02473
ENSG00000093009.9_2	CDC45	chr22:19466982-19508135	+	protein_coding	2.59198	6.02924	8.91928e-05	0.00562156	2.85905	0.267077	0.275536	0.461779	0.0789454	0.0423633	4.70957	10.5266	4.30914	6.93078
ENSG00000187134.13_3	AKR1C1	chr10:5005445-5025475	+	protein_coding	2.5897	6.01972	0.0231657	0.0791948	4.42936	1.83966	7.71323	2.42447	1.31567	1.37532	24.0074	58.8307	26.0151	4.33183
ENSG00000276043.4_3	UHRF1	chr19:4903092-4962165	+	protein_coding	2.58651	6.00642	0.000597767	0.0112411	3.18764	0.601134	0.485705	1.19986	0.335891	0.21266	6.05144	11.8682	4.28357	13.374
ENSG00000129451.11_2	KLK10	chr19:51515995-51523431	-	protein_coding	2.58067	5.98219	0.0145386	0.0592405	3.14385	0.563178	0.695682	1.19079	0.10226	0.163873	20.6679	2.33328	3.16813	19.2743
ENSG00000197238.4_2	HIST1H4J	chr6:27791886-27792258	+	protein_coding	2.57306	5.95072	0.00160183	0.0182119	5.02198	2.44892	7.28287	6.66922	3.21027	2.32315	28.1104	38.8667	16.6944	53.272
ENSG00000100526.19_3	CDKN3	chr14:54863567-54886936	+	protein_coding	2.56718	5.92651	0.00262893	0.0232867	3.53875	0.971567	1.37049	0.988747	0.631758	0.922247	5.40873	30.0816	6.6941	10.9028
ENSG00000134057.14_3	CCNB1	chr5:68462837-68474072	+	protein_coding	2.56686	5.92519	0.00155879	0.0179684	3.8893	1.32244	1.19615	2.61414	1.27454	1.16681	7.96803	30.8479	8.35591	17.0436
ENSG00000111247.14_2	RAD51AP1	chr12:4647964-4669214	+	protein_coding	2.56529	5.91872	0.000290688	0.00846894	3.24601	0.680729	0.573905	0.907718	0.452267	0.51405	6.34236	9.86756	4.99425	15.939
ENSG00000143153.12_2	ATP1B1	chr1:169074935-169101960	+	protein_coding	2.56057	5.8994	0.00170377	0.0187279	6.47554	3.91498	6.46413	21.4594	17.9255	15.3183	136.006	63.4207	123.234	56.191
ENSG00000197409.7_3	HIST1H3D	chr6:26197068-26197478	-	protein_coding	2.5597	5.89583	0.00222222	0.021395	4.31672	1.75702	3.93698	3.03261	1.02224	2.24179	9.40359	21.9406	15.0787	40.0966
ENSG00000160213.6_2	CSTB	chr21:45192392-45196326	-	protein_coding	2.55405	5.87282	0.040164	0.11197	4.92306	2.369	6.63132	10.525	1.51046	2.2253	21.0829	9.00513	24.063	151.982
ENSG00000138778.11_2	CENPE	chr4:104026963-104119566	-	protein_coding	2.55299	5.8685	0.00117613	0.0155613	4.07689	1.5239	1.33079	2.54872	1.81477	1.93721	10.5854	34.1874	8.63087	19.6586
ENSG00000135525.18_3	MAP7	chr6:136663419-136871957	-	protein_coding	2.55132	5.86171	0.000456635	0.00999892	4.46342	1.9121	1.76195	5.40208	2.05652	2.71224	16.3464	35.3851	20.6196	16.3587
ENSG00000077152.9_2	UBE2T	chr1:202300785-202311108	-	protein_coding	2.5508	5.8596	0.00337618	0.0262481	3.40014	0.849335	0.532126	1.34524	0.633998	0.794603	5.92759	24.2582	3.95626	13.3231
ENSG00000171219.8_2	CDC42BPG	chr11:64590859-64612041	-	protein_coding	2.54668	5.8429	1.78556e-05	0.0033573	3.01365	0.466966	0.327728	0.95131	0.235328	0.140421	8.54947	5.6206	7.81056	6.63688
ENSG00000072274.12_2	TFRC	chr3:195754054-195809060	-	protein_coding	2.54259	5.82635	0.000574143	0.0109893	5.22483	2.68224	6.27707	4.24668	5.32117	6.03237	39.2207	73.6078	22.57	26.6524
ENSG00000167165.18_3	UGT1A6	chr2:234600253-234681946	+	protein_coding	2.5412	5.82073	0.00249321	0.0226771	2.63835	0.097151	0.0416151	0.192984	0.0283295	0.024489	5.03751	15.5838	3.6854	2.20336
ENSG00000076382.16_3	SPAG5	chr17:26904583-26926297	-	protein_coding	2.53793	5.80755	0.00080989	0.0129544	3.47953	0.941603	1.71539	0.850914	0.812722	0.493663	5.91564	18.1117	6.56104	14.4904
ENSG00000023909.9_2	GCLM	chr1:94350761-94375012	-	protein_coding	2.53517	5.79645	0.00789138	0.0414677	4.28961	1.75444	4.94763	1.561	2.58285	1.37449	26.1177	50.125	10.8273	7.92128
ENSG00000167767.13_2	KRT80	chr12:52562780-52585784	-	protein_coding	2.53398	5.79167	0.00192121	0.0197914	2.80167	0.26769	0.116435	0.775553	0.0395111	0.0193757	13.0368	6.58862	2.13174	6.08481
ENSG00000119969.14_3	HELLS	chr10:96261191-96373662	+	protein_coding	2.53272	5.78663	3.6039e-05	0.0044404	3.54993	1.0172	1.06311	1.62013	0.80569	0.71927	10.1545	13.2133	7.2369	13.4087
ENSG00000137648.17_3	TMPRSS4	chr11:117947727-117992605	+	protein_coding	2.53024	5.77667	0.00841559	0.0430516	2.86697	0.33673	0.0566169	1.05247	0.114462	0.0524557	9.29513	17.3227	1.47694	5.06229
ENSG00000104738.16_3	MCM4	chr8:48872745-48890720	+	protein_coding	2.52063	5.73833	2.4745e-05	0.0038406	4.26245	1.74182	1.92577	2.32579	2.64874	2.5244	19.2587	26.1249	12.6047	17.1483
ENSG00000127152.17_2	BCL11B	chr14:99635624-99737861	-	protein_coding	2.51982	5.73511	0.0020921	0.0207035	2.93921	0.419387	0.516212	0.351929	0.214121	0.285337	6.38532	2.30426	7.36344	15.9563
ENSG00000103888.16_2	CEMIP	chr15:81071684-81244117	+	protein_coding	2.51474	5.71496	0.00336012	0.0261869	2.7416	0.226852	0.298443	0.189176	0.129822	0.0751715	5.50924	17.253	2.11478	4.40654
ENSG00000164611.12_2	PTTG1	chr5:159848829-159855751	+	protein_coding	2.51223	5.70501	0.000181328	0.00719366	3.27288	0.760655	0.518605	1.10186	0.666797	0.548778	4.66804	12.4907	7.95205	11.7513
ENSG00000142765.17_3	SYTL1	chr1:27668511-27680428	+	protein_coding	2.51041	5.69784	0.00124751	0.0160425	3.70438	1.19397	3.14218	2.01399	0.398831	0.568718	14.0929	7.41493	16.5407	11.9613
ENSG00000024526.16_3	DEPDC1	chr1:68939835-68962904	-	protein_coding	2.50978	5.69531	0.00319835	0.0255309	2.73188	0.222107	0.144968	0.372942	0.0565778	0.114542	3.87281	17.2911	2.38038	5.46443
ENSG00000080986.12_2	NDC80	chr18:2571510-2616634	+	protein_coding	2.50873	5.69119	0.00620317	0.0362297	3.7866	1.27787	1.58468	1.47043	1.51036	1.15674	5.1424	28.9572	6.28765	26.0456
ENSG00000174371.16_3	EXO1	chr1:242011269-242058450	+	protein_coding	2.50443	5.67426	0.00516573	0.0326875	2.73038	0.225945	0.152758	0.285544	0.0716204	0.178146	2.28193	7.91288	2.65395	17.1465
ENSG00000188015.9_3	S100A3	chr1:153519805-153521848	-	protein_coding	2.48948	5.61575	0.017931	0.0675239	2.71875	0.22927	0	0.668203	0	0.131932	1.98482	18.6594	11.9905	1.46368
ENSG00000136231.13_2	IGF2BP3	chr7:23349828-23510086	-	protein_coding	2.48035	5.58035	0.00072139	0.0121969	2.7356	0.255243	0.139946	0.364504	0.106562	0.178985	6.04296	9.82322	2.12683	7.25604
ENSG00000132646.10_2	PCNA	chr20:5095599-5107272	-	protein_coding	2.47133	5.54554	8.3781e-05	0.00559742	5.92328	3.45195	10.5474	11.2572	8.37326	9.80926	52.5136	83.5458	38.4715	74.9449
ENSG00000140525.17_4	FANCI	chr15:89787180-89860492	+	protein_coding	2.47069	5.54307	0.00011701	0.00604642	3.28201	0.811325	0.785061	0.976747	0.580884	0.699921	6.61177	13.5684	5.60797	11.2172
ENSG00000179051.13_3	RCC2	chr1:17733256-17766220	-	protein_coding	2.46997	5.54031	9.09811e-05	0.00562156	5.20892	2.73896	7.81437	6.95797	4.05424	4.60251	40.92	44.9869	24.6991	36.7743
ENSG00000169607.12_2	CKAP2L	chr2:113494184-113522254	-	protein_coding	2.46921	5.53739	0.000138541	0.00651228	2.83977	0.370566	0.29757	0.574606	0.230785	0.111018	4.38567	10.8705	4.44629	6.54427
ENSG00000163191.5_2	S100A11	chr1:152004982-152020383	-	protein_coding	2.46626	5.52608	0.0140849	0.058205	8.5187	6.05244	171.353	88.8344	35.0392	33.7722	227.082	903.18	245.312	355.209
ENSG00000078081.7_3	LAMP3	chr3:182840001-182881627	-	protein_coding	2.46284	5.51303	0.00493718	0.0319184	2.66261	0.19977	0.283103	0.17084	0.0260767	0.128775	2.25967	4.50981	3.57061	18.5804
ENSG00000147889.17_3	CDKN2A	chr9:21967752-21995300	-	protein_coding	2.46228	5.51088	0.00463047	0.0306711	3.10787	0.645583	0.385374	1.29963	0.372727	0.369468	12.2184	12.7054	9.48901	1.90694
ENSG00000119314.15_3	PTBP3	chr9:114979996-115095947	-	protein_coding	2.46201	5.50983	0.000839938	0.0131111	4.76578	2.30377	9.3396	3.57091	2.64817	2.44694	25.2733	29.0088	33.1845	19.3224
ENSG00000105976.14_3	MET	chr7:116312444-116438440	+	protein_coding	2.46075	5.50504	0.000752684	0.0124382	4.32446	1.8637	4.36117	2.83686	1.66171	2.20427	29.8508	21.1209	21.3209	9.57754
ENSG00000124635.8_2	HIST1H2BJ	chr6:27093676-27100529	-	protein_coding	2.46	5.50216	0.00102025	0.014494	4.56317	2.10318	5.67013	2.87877	2.15025	3.18123	19.6399	31.6855	11.7473	35.3182
ENSG00000125398.5_2	SOX9	chr17:70117161-70122561	+	protein_coding	2.45972	5.5011	0.00801315	0.0418423	3.33814	0.878424	3.86113	0.69787	0.082504	0.27837	3.62862	8.92395	14.4662	13.7233
ENSG00000135069.13_2	PSAT1	chr9:80912059-80945009	+	protein_coding	2.45779	5.49374	0.00211717	0.0208411	3.62837	1.17058	1.51652	2.29157	0.687549	0.836809	20.2108	15.5556	4.50243	11.1043
ENSG00000102287.18_3	GABRE	chrX:151121596-151143152	-	protein_coding	2.45284	5.47494	0.00938253	0.0457959	3.46838	1.01553	3.33293	0.652133	0.565422	0.490621	13.0224	4.20672	27.1765	6.29574
ENSG00000146670.9_3	CDCA5	chr11:64833772-64851636	-	protein_coding	2.45266	5.47424	0.00222917	0.0214528	2.68522	0.23256	0.18468	0.195516	0.122151	0.19901	3.43761	16.4131	3.42684	4.00274
ENSG00000099953.9_3	MMP11	chr22:24110413-24126503	+	protein_coding	2.44593	5.44875	0.00939107	0.0458088	2.83884	0.392915	0.293711	0.259651	0.333536	0.367806	19.0531	5.21253	8.15973	1.29599
ENSG00000134690.10_2	CDCA8	chr1:38158090-38175391	+	protein_coding	2.44476	5.44436	0.000480928	0.010104	2.76054	0.315776	0.206375	0.587533	0.102995	0.136198	4.49209	12.4138	3.71566	5.06999
ENSG00000071539.13_3	TRIP13	chr5:892758-919472	+	protein_coding	2.44222	5.43478	0.00015947	0.00690192	2.96404	0.521815	0.435104	0.840568	0.231516	0.306328	5.99366	11.5138	4.22071	7.11394
ENSG00000188064.9_3	WNT7B	chr22:46316242-46373009	-	protein_coding	2.43984	5.4258	0.000687783	0.0119894	2.53271	0.0928775	0.0944711	0.144866	0	0.0324677	3.95068	6.6687	8.88748	1.98689
ENSG00000112984.11_3	KIF20A	chr5:137514408-137523404	+	protein_coding	2.43892	5.42236	1.06327e-05	0.00276635	2.66462	0.225701	0.101069	0.510682	0.06865	0.0518363	4.02388	6.54216	4.97213	6.14267
ENSG00000108839.11_3	ALOX12	chr17:6899384-6914055	+	protein_coding	2.43707	5.41542	0.00130995	0.0164173	3.05158	0.614509	0.844761	1.3687	0.147317	0.0959993	5.14688	9.56153	4.1751	13.066
ENSG00000152766.5_2	ANKRD22	chr10:90581889-90611575	-	protein_coding	2.43361	5.40244	0.0108097	0.049767	2.96512	0.531505	1.44405	0.626473	0	0.0980918	2.35737	9.02257	3.97094	21.23
ENSG00000141579.6_2	ZNF750	chr17:80787311-80798454	-	protein_coding	2.4326	5.39865	0.00516098	0.0326702	2.80892	0.376325	0.05982	1.44115	0.072999	0.022622	5.35073	1.95822	7.98591	13.2845
ENSG00000203852.3_2	HIST2H3A	chr1:149824181-149825836	+	protein_coding	2.43256	5.39852	0.00323066	0.0256607	2.8027	0.370139	0.520585	0.475971	0.149109	0.082036	2.343	13.7295	3.60248	9.4586
ENSG00000111700.12_3	SLCO1B3	chr12:20963636-21069845	+	protein_coding	2.43079	5.39188	0.0443783	0.119189	2.59948	0.168691	0.0412579	0.39725	0.0079451	0.088566	0.323762	31.644	5.75501	3.62217
ENSG00000164695.4_2	CHMP4C	chr8:82644669-82671750	+	protein_coding	2.42943	5.38681	0.0196956	0.0716217	3.74048	1.31105	1.48633	4.29958	0.740283	0.65286	11.5279	43.4491	3.69148	11.216
ENSG00000145934.16_3	TENM2	chr5:166711804-167691162	+	protein_coding	2.4294	5.38669	0.0205662	0.0737215	3.3463	0.916902	2.70591	0.521771	0.624265	0.387265	2.34888	7.83921	35.3291	8.94906
ENSG00000141682.11_2	PMAIP1	chr18:57567180-57571538	+	protein_coding	2.42874	5.38424	0.00829827	0.0427918	4.0263	1.59756	4.47086	1.75599	2.05575	0.82055	7.25865	35.5459	8.11326	24.6289
ENSG00000108375.12_3	RNF43	chr17:56429861-56494956	-	protein_coding	2.4233	5.36396	0.000442642	0.00994454	2.70257	0.279271	0.299632	0.292415	0.12262	0.150327	5.62526	7.10407	2.33136	9.039
ENSG00000112297.14_4	CRYBG1	chr6:106808683-107019853	+	protein_coding	2.41161	5.32068	0.00333053	0.0260348	4.70468	2.29307	6.79995	7.35495	1.78836	2.17504	16.8779	21.9633	22.9831	45.9618
ENSG00000006555.10_2	TTC22	chr1:55245385-55266940	-	protein_coding	2.41077	5.31758	0.000460564	0.0100012	2.78715	0.376374	0.25428	1.04354	0.085019	0.0209025	5.68208	3.48891	5.84397	10.0585
ENSG00000115339.13_3	GALNT3	chr2:166604101-166651192	-	protein_coding	2.40353	5.29097	0.00191968	0.0197848	3.72717	1.32363	3.49849	1.95911	0.942181	0.51808	11.3513	20.6993	6.91224	13.5043
ENSG00000136688.10_3	IL36G	chr2:113730780-113743242	+	protein_coding	2.39815	5.27125	0.000165671	0.0069485	2.54586	0.147715	0.228667	0.225837	0	0	2.60737	8.0255	4.45575	5.54645
ENSG00000213123.10_3	TCTEX1D2	chr3:196018090-196045170	-	protein_coding	2.39472	5.25874	0.0003274	0.00891189	3.93386	1.53914	1.34822	1.89222	2.09644	2.39215	12.3019	27.604	11.8206	10.1838
ENSG00000106537.7_2	TSPAN13	chr7:16793160-16824161	+	protein_coding	2.38993	5.24132	0.0150049	0.0604491	3.81623	1.4263	4.50192	2.07869	0.546699	0.991353	12.2537	41.4989	5.08534	10.4867
ENSG00000185130.5_2	HIST1H2BL	chr6:27775222-27775709	-	protein_coding	2.38816	5.23491	0.00212389	0.0208705	3.39545	1.00729	1.46791	0.947142	1.10948	0.610631	7.14348	18.3469	3.99175	14.5905
ENSG00000183943.5_2	PRKX	chrX:3522411-3631649	-	protein_coding	2.38227	5.21357	0.000307352	0.00867314	4.36907	1.9868	3.56729	5.30531	2.20644	1.67271	27.4133	19.4429	15.5668	17.9487
ENSG00000101003.9_2	GINS1	chr20:25388363-25433264	+	protein_coding	2.38077	5.20813	0.000954215	0.0140423	2.83277	0.452008	0.295376	0.714684	0.248809	0.262396	5.13661	12.8518	2.89917	6.77308
ENSG00000162522.10_2	KIAA1522	chr1:33207486-33240571	+	protein_coding	2.37752	5.19641	6.60771e-05	0.00519089	4.20919	1.83167	1.85231	3.39169	2.03697	3.2197	23.847	19.3072	15.9414	12.6928
ENSG00000267645.5_3	POLR2J2	chr7:102277496-102312088	-	protein_coding	2.37572	5.18995	0.0171269	0.0654733	3.72854	1.35282	0.405524	1.10022	3.94619	1.9146	28.0729	3.33563	21.7685	9.75794
ENSG00000171889.3_3	MIR31HG	chr9:21455641-21559668	-	sense_overlapping	2.37518	5.18802	0.00533088	0.033199	2.53087	0.155684	0	0.447977	0.06341	0	2.36237	15.0541	5.46012	2.19889
ENSG00000139734.17_3	DIAPH3	chr13:60239717-60738121	-	protein_coding	2.36938	5.16719	0.00195993	0.0200061	3.02069	0.651311	0.284782	1.80577	0.196574	0.410703	4.47634	14.3041	4.54659	8.33149
ENSG00000273983.1_2	HIST1H3G	chr6:26269633-26272043	-	protein_coding	2.36791	5.16194	0.0130215	0.0555466	2.57765	0.209741	0.448725	0.173661	0	0.052021	5.39526	8.26928	0.602989	12.365
ENSG00000135750.14_2	KCNK1	chr1:233749750-233808258	+	protein_coding	2.36377	5.14713	0.00326657	0.0257546	2.91578	0.552013	0.877648	0.613364	0.229861	0.240186	4.71305	19.3555	4.14768	4.41738
ENSG00000168685.14_2	IL7R	chr5:35852797-35879705	+	protein_coding	2.36123	5.13809	0.00042809	0.00979398	3.53231	1.17108	1.28428	0.608951	2.46374	1.01969	8.76118	6.97368	16.2753	12.3273
ENSG00000136108.14_4	CKAP2	chr13:53029564-53050763	+	protein_coding	2.36007	5.13394	0.00136755	0.0167399	4.11601	1.75595	2.08836	3.98797	1.56097	2.29848	9.31723	33.5994	13.348	16.6502
ENSG00000135378.3_2	PRRG4	chr11:32851489-32879669	+	protein_coding	2.35273	5.10789	0.000386602	0.00937185	3.50449	1.15176	2.0543	1.8084	1.08115	0.365162	13.4506	9.3361	6.98453	12.9101
ENSG00000136810.12_2	TXN	chr9:113006091-113018920	-	protein_coding	2.34957	5.09671	0.000375855	0.009265	7.05337	4.70381	27.9417	25.4232	22.6851	24.4661	75.4759	225.53	143.299	123.508
ENSG00000146386.7_2	ABRACL	chr6:139349819-139364439	+	protein_coding	2.34847	5.09283	0.00156085	0.0179684	4.77918	2.43072	6.42609	5.97607	2.52927	3.62188	24.3646	35.078	13.4672	41.9394
ENSG00000097046.12_2	CDC7	chr1:91966450-91991321	+	protein_coding	2.34472	5.0796	0.000528475	0.0104844	3.36992	1.0252	1.49034	1.27062	0.853544	0.637051	7.67801	18.2941	5.82723	8.99306
ENSG00000163814.7_3	CDCP1	chr3:45123770-45187914	-	protein_coding	2.34307	5.07381	0.00323224	0.0256641	3.14829	0.805223	1.86593	1.036	0.2076	0.32318	2.93785	10.5789	12.7586	8.84971
ENSG00000163923.9_3	RPL39L	chr3:186838736-186898696	-	protein_coding	2.33737	5.05379	0.0057614	0.0348078	4.1332	1.79584	2.26178	2.78252	1.90277	3.05837	6.95719	35.7325	9.63238	29.5092
ENSG00000178999.12_3	AURKB	chr17:8108051-8113918	-	protein_coding	2.33679	5.05177	0.00168192	0.0186301	2.62753	0.290744	0.591542	0.230448	0.082563	0.056223	3.075	10.0319	2.5334	8.18112
ENSG00000203760.8_2	CENPW	chr6:126661320-126670021	+	protein_coding	2.33478	5.04473	0.00379778	0.0277361	5.70115	3.36637	6.20086	12.4872	11.5553	8.2764	37.117	128.993	28.6933	48.7928
ENSG00000198018.6_3	ENTPD7	chr10:101419263-101465997	+	protein_coding	2.33421	5.04274	0.000744221	0.0123792	3.4425	1.10829	2.46813	0.979139	0.78121	0.766967	8.79578	13.1189	14.6302	5.46217
ENSG00000060558.3_2	GNA15	chr19:3136191-3163767	+	protein_coding	2.33368	5.04088	0.00690361	0.0384058	4.51894	2.18526	9.30744	4.87211	2.18577	1.21899	13.1943	29.052	17.0661	34.85
ENSG00000104881.15_3	PPP1R13L	chr19:45882892-45909607	-	protein_coding	2.33145	5.03312	0.000154603	0.00682235	3.40888	1.07743	1.19524	1.46153	0.935666	0.895977	8.69304	7.24345	17.1917	7.75504
ENSG00000111816.7_2	FRK	chr6:116252312-116381921	-	protein_coding	2.32875	5.0237	0.00159563	0.0181789	3.03231	0.703566	0.66655	0.994036	0.410263	0.500811	10.4917	9.13159	2.47507	10.0725
ENSG00000148848.14_3	ADAM12	chr10:127700950-128077024	-	protein_coding	2.32788	5.02066	0.0125858	0.0544158	2.92974	0.60186	1.667	0.248553	0.377646	0.156499	12.4733	6.96809	12.6021	1.30844
ENSG00000232679.1_2	LINC01705	chr1:222215047-222238105	-	lincRNA	2.32732	5.01871	0.00461632	0.0306499	2.52736	0.200039	0.320862	0.318297	0	0	6.704	2.46622	12.8487	1.98715
ENSG00000163435.15_3	ELF3	chr1:201977073-201986316	+	protein_coding	2.32583	5.01354	0.0140688	0.0581544	3.10876	0.782936	1.12608	1.89873	0.1522	0.234339	10.8584	11.2965	1.50647	14.1514
ENSG00000112972.14_3	HMGCS1	chr5:43289497-43313614	-	protein_coding	2.32443	5.00868	0.00046761	0.0100238	5.11739	2.79296	7.95309	4.10641	8.70628	4.19899	44.92	20.957	36.3421	37.5636
ENSG00000112742.9_2	TTK	chr6:80713604-80752244	+	protein_coding	2.32235	5.00146	0.000216046	0.00763727	2.49589	0.173541	0.117131	0.280451	0.0550387	0.0720847	3.01015	6.97366	2.98798	6.93925
ENSG00000158125.9_2	XDH	chr2:31557187-31637581	-	protein_coding	2.3201	4.99367	0.00202618	0.0203471	2.48507	0.164972	0.0904059	0.353238	0.0416074	0.0279689	2.70475	4.02957	2.88255	12.5806
ENSG00000163362.10_4	INAVA	chr1:200860176-200884863	+	protein_coding	2.31816	4.98697	1.53742e-05	0.0031261	2.37858	0.0604146	0.0176954	0.161793	0	0	4.12033	4.64219	5.73779	2.7569
ENSG00000100300.17_2	TSPO	chr22:43547520-43559248	+	protein_coding	2.31567	4.97837	0.0103547	0.0486325	4.48691	2.17124	11.2621	3.71754	1.73625	1.60013	12.6068	27.4413	15.4385	38.7385
ENSG00000069011.15_2	PITX1	chr5:134363425-134370503	-	protein_coding	2.31425	4.97347	0.0219946	0.0769313	3.86639	1.55214	3.42955	4.49644	0.840033	0.650799	18.6328	4.07548	10.9045	37.1442
ENSG00000187990.4	HIST1H2BG	chr6:26216428-26216872	-	protein_coding	2.30725	4.94939	0.00274072	0.0237504	4.94925	2.642	3.37194	5.66589	4.85394	7.89824	21.3319	52.3387	15.0287	46.7118
ENSG00000052802.12_3	MSMO1	chr4:166248775-166264312	+	protein_coding	2.30643	4.94656	0.000278918	0.00832107	3.53936	1.23293	1.75573	1.16947	1.05469	1.48462	12.4957	5.46408	15.0561	12.0457
ENSG00000240972.1_3	MIF	chr22:24236191-24237414	+	protein_coding	2.30624	4.94594	0.0023883	0.022146	6.8879	4.58166	18.6306	28.3092	22.5866	23.2249	64.717	273.972	120.107	88.8922
ENSG00000161249.20_4	DMKN	chr19:35988122-36004560	-	protein_coding	2.30512	4.94207	0.00893151	0.0445661	2.73642	0.431308	0.274097	1.07158	0.106868	0.131737	7.58312	2.39916	2.72366	17.155
ENSG00000211448.11_3	DIO2	chr14:80663870-80854100	-	protein_coding	2.29974	4.92369	0.000145212	0.00665805	4.43076	2.13102	2.45398	6.11517	3.20391	2.56319	20.4545	17.3079	19.2047	26.2616
ENSG00000114770.16_2	ABCC5	chr3:183637722-183735803	-	protein_coding	2.29087	4.8935	4.66435e-05	0.00488357	4.50866	2.21779	4.42546	4.00687	3.32952	2.98147	33.167	18.2854	19.5849	18.7962
ENSG00000168528.11_2	SERINC2	chr1:31882412-31907527	+	protein_coding	2.29007	4.8908	3.4228e-05	0.00442689	2.63008	0.340007	0.375296	0.451383	0.158117	0.110396	5.12042	7.0762	5.79958	3.36977
ENSG00000168476.11_3	REEP4	chr8:21995533-21999464	-	protein_coding	2.28863	4.88593	7.78333e-06	0.00271703	3.22599	0.937359	1.20314	1.37092	0.47073	0.75066	8.22329	8.23755	9.06757	7.93543
ENSG00000069849.10_2	ATP1B3	chr3:141594966-141645356	+	protein_coding	2.28739	4.88174	0.00125215	0.0160646	6.07225	3.78485	22.6243	9.83358	12.1273	9.74265	109.168	39.1821	63.99	70.2494
ENSG00000111206.12_3	FOXM1	chr12:2966847-2986321	-	protein_coding	2.28665	4.87921	0.000292991	0.00850283	2.63529	0.348645	0.328198	0.626043	0	0.217351	3.05073	7.85106	4.1286	7.10365
ENSG00000167900.11_2	TK1	chr17:76170156-76183314	-	protein_coding	2.28501	4.87368	0.00615358	0.0360815	3.93536	1.65035	0.41058	2.76613	3.29284	3.25779	13.4249	26.7475	6.48109	17.2958
ENSG00000157992.12_2	KRTCAP3	chr2:27665233-27669348	+	protein_coding	2.28221	4.86423	0.00116121	0.0154563	2.44644	0.164229	0.0351318	0.288293	0.0947656	0.0799894	2.8363	10.7894	2.70921	4.26167
ENSG00000042493.15_2	CAPG	chr2:85621871-85645555	-	protein_coding	2.28012	4.85719	0.000197214	0.00739141	4.11024	1.83012	4.62126	2.84342	1.57013	1.8786	13.7968	20.9385	14.2924	16.9216
ENSG00000118640.10_2	VAMP8	chr2:85788685-85809154	+	protein_coding	2.27821	4.85074	0.00110526	0.0151243	5.1806	2.9024	11.691	7.21924	3.94389	5.05954	32.032	31.113	25.9902	59.4291
ENSG00000029993.14_3	HMGB3	chrX:150148982-150159248	+	protein_coding	2.2742	4.83729	0.00139285	0.0169008	4.41096	2.13676	2.13724	5.68144	3.07349	3.38052	23.6108	37.6833	13.0407	14.3207
ENSG00000122952.16_3	ZWINT	chr10:58116989-58121036	-	protein_coding	2.27374	4.83575	0.000192811	0.00734355	3.00739	0.733646	0.4955	1.29736	0.376496	0.616618	6.57787	9.89858	4.2769	8.5931
ENSG00000183856.10_2	IQGAP3	chr1:156495197-156542396	-	protein_coding	2.27349	4.83492	0.000255284	0.00814223	2.48229	0.208803	0.202047	0.461076	0	0.0158502	3.05684	7.92041	3.25414	5.33281
ENSG00000188508.10_2	KRTDAP	chr19:35978226-35986460	-	protein_coding	2.27227	4.83081	0.0354635	0.103347	2.27227	0	0	0	0	0	7.49596	0	3.3113	13.8683
ENSG00000131015.4_2	ULBP2	chr6:150263136-150270371	+	protein_coding	2.27006	4.82343	0.00132849	0.016523	2.38634	0.116281	0.084192	0.198367	0	0.062478	2.29284	8.7874	6.07361	2.27764
ENSG00000205336.11_3	ADGRG1	chr16:57644564-57699492	+	protein_coding	2.26951	4.82159	0.000133179	0.00644997	3.06449	0.794984	1.05121	0.531486	0.7758	0.62457	7.12022	7.05756	12.1114	4.70949
ENSG00000270141.3_2	TERC	chr3:169482308-169482848	-	lincRNA	2.26743	4.81465	0.000273681	0.00828327	7.11425	4.84682	42.8034	28.0398	24.8914	19.8207	157.507	163.005	91.2119	152.716
ENSG00000111602.11_2	TIMELESS	chr12:56810157-56843187	-	protein_coding	2.26466	4.80542	0.00161139	0.0182279	3.82916	1.5645	1.83451	3.31995	1.60369	1.40047	10.2411	24.463	6.90358	17.0396
ENSG00000149968.11_2	MMP3	chr11:102706532-102714534	-	protein_coding	2.26458	4.80515	0.00925045	0.0453702	2.82322	0.558637	0.128327	0.288342	0	2.23742	2.69921	4.08577	14.9394	7.36669
ENSG00000089685.14_3	BIRC5	chr17:76210267-76221717	+	protein_coding	2.26362	4.80196	0.00261775	0.0232471	2.57338	0.309758	0.260292	0.586117	0.0720832	0.101414	3.429	12.9946	2.44619	4.87564
ENSG00000148053.15_2	NTRK2	chr9:87283466-87641985	+	protein_coding	2.26303	4.79997	0.0416004	0.114383	3.84325	1.58023	8.58209	1.01472	0.933747	1.14145	27.1078	2.71839	24.3579	15.0119
ENSG00000117450.13_2	PRDX1	chr1:45976708-45988719	-	protein_coding	2.2629	4.79954	0.000169985	0.00703035	6.30605	4.04315	16.1967	23.2645	13.1034	11.5517	56.132	85.0153	76.5028	101.913
ENSG00000073111.13_3	MCM2	chr3:127317066-127341279	+	protein_coding	2.26137	4.79448	0.00137051	0.0167569	3.77205	1.51067	1.20365	3.63209	1.38022	1.7133	10.5909	19.4857	6.83105	17.7331
ENSG00000130489.14_3	SCO2	chr22:50961997-50964035	-	protein_coding	2.25975	4.78907	0.0238947	0.0808231	3.05984	0.800096	0.726603	1.30371	1.11199	0.094207	1.23294	5.92498	19.0288	14.6123
ENSG00000156463.17_3	SH3RF2	chr5:145316142-145461354	+	protein_coding	2.2591	4.78693	0.00977549	0.0469572	2.7345	0.475397	0.594684	0.549911	0.131325	0.336182	8.53366	0.93829	8.56846	10.0954
ENSG00000183598.3_2	HIST2H3D	chr1:149784826-149785236	-	protein_coding	2.25689	4.77959	0.0163279	0.0635312	3.43637	1.17948	3.78246	0.573417	0.544134	1.26493	4.00292	27.5152	5.66551	13.4432
ENSG00000118242.15_3	MREG	chr2:216807528-216898819	-	protein_coding	2.24714	4.7474	0.00168359	0.0186301	3.41976	1.17263	1.31844	3.48594	0.56834	0.583041	10.5705	10.0896	6.0581	13.4827
ENSG00000163032.11_3	VSNL1	chr2:17720393-17838285	+	protein_coding	2.24139	4.72852	0.00445653	0.0301626	3.93412	1.69273	0.185168	3.93566	2.6228	4.15323	15.7077	16.2978	11.4868	14.1283
ENSG00000113810.15_2	SMC4	chr3:160117062-160152750	+	protein_coding	2.24061	4.72598	0.000954646	0.0140423	5.29743	3.05682	5.51687	10.4833	7.78112	6.29662	26.8447	58.6502	24.4071	55.6807
ENSG00000170786.12_2	SDR16C5	chr8:57212569-57233335	-	protein_coding	2.23938	4.72195	0.0091393	0.0451166	2.42662	0.187235	0.1259	0.394994	0.0301425	0.0386862	1.20121	12.0775	2.50002	7.29244
ENSG00000198826.10_3	ARHGAP11A	chr15:32907345-32932150	+	protein_coding	2.23493	4.70738	0.00128159	0.0162652	2.91741	0.682488	0.562306	1.13161	0.371216	0.452838	4.93256	12.9874	3.34405	8.03735
ENSG00000170561.12_2	IRX2	chr5:2745959-2751776	-	protein_coding	2.23111	4.69495	2.10249e-06	0.00208233	2.42799	0.196882	0.198352	0.290873	0.115838	0	3.46716	5.12184	4.77217	4.31302
ENSG00000146904.8_2	EPHA1	chr7:143087382-143105985	-	protein_coding	2.23046	4.69285	0.000822195	0.0130288	2.50154	0.271078	0.112209	0.763231	0.0671781	0.0131592	4.67838	2.737	3.73931	9.22576
ENSG00000178078.11_2	STAP2	chr19:4324040-4342783	-	protein_coding	2.22993	4.69111	0.000436095	0.00991007	3.33749	1.10756	0.629612	2.05099	0.990591	1.17834	10.1857	9.70485	5.10945	13.2721
ENSG00000227036.6_2	LINC00511	chr17:70319264-70636611	-	lincRNA	2.22746	4.68309	1.91887e-06	0.00208233	2.40331	0.17585	0.25223	0.123674	0.0861842	0.0654095	4.88878	3.27399	4.18851	4.99752
ENSG00000197506.7_2	SLC28A3	chr9:86890372-86955598	-	protein_coding	2.22636	4.67953	0.0164526	0.0638443	2.37112	0.144761	0.086744	0.290525	0.0392408	0.0249417	2.65567	1.03198	17.3259	4.26219
ENSG00000197846.3	HIST1H2BF	chr6:26199748-26200942	+	protein_coding	2.22367	4.67081	0.00311936	0.0251154	3.66545	1.44178	2.22555	1.73353	1.36455	1.61213	10.6468	17.9039	4.36611	20.9393
ENSG00000136002.18_3	ARHGEF4	chr2:131594489-131804836	+	protein_coding	2.22242	4.66676	0.0115688	0.0518317	3.22802	1.0056	0.518091	1.31039	1.04258	1.2683	15.4553	2.67393	20.5787	4.90829
ENSG00000266869.1_3	AC005993.1	chr14:72315323-72375147	+	lincRNA	2.22208	4.66566	0.011975	0.0530261	2.29777	0.0756848	0	0.233484	0	0	7.1899	7.91812	4.71987	0.399101
ENSG00000117472.9_2	TSPAN1	chr1:46640745-46651630	+	protein_coding	2.21454	4.64134	0.0441334	0.118902	2.43982	0.225283	0.22396	0.316791	0.0841141	0.0688293	9.36958	19.8129	0.531764	1.62153
ENSG00000050344.8_2	NFE2L3	chr7:26191860-26226745	+	protein_coding	2.21262	4.63517	0.0248303	0.0828602	3.39873	1.18611	1.51727	1.57464	1.47367	0.67197	3.30098	8.46384	5.85592	43.3381
ENSG00000073792.15_2	IGF2BP2	chr3:185361527-185542844	-	protein_coding	2.21172	4.63229	0.00200565	0.0202694	4.51772	2.30599	7.93072	4.31603	2.58448	2.51392	32.6548	12.1957	24.0604	23.7403
ENSG00000163808.16_3	KIF15	chr3:44803209-44914868	+	protein_coding	2.21097	4.62988	0.00129986	0.0163763	3.00975	0.798775	0.777442	1.16051	0.430575	0.66709	4.10144	12.3484	4.25159	10.7676
ENSG00000101773.18_3	RBBP8	chr18:20378224-20606451	+	protein_coding	2.21072	4.62908	0.0178792	0.0674276	5.50824	3.29752	7.34401	9.76519	10.6391	7.93902	30.2081	51.0766	16.0433	153.925
ENSG00000196739.14_2	COL27A1	chr9:116917840-117074791	+	protein_coding	2.20886	4.62309	0.0240619	0.0812167	3.76566	1.5568	1.75214	2.18643	2.43089	1.48998	13.7293	3.76424	51.3546	8.31491
ENSG00000189159.15_4	JPT1	chr17:73131343-73164376	-	protein_coding	2.20219	4.60178	0.002046	0.0204538	3.56099	1.3588	2.6409	2.021	1.04427	0.924224	10.0257	23.4724	7.23353	7.73352
ENSG00000115107.19_2	STEAP3	chr2:119981407-120023228	+	protein_coding	2.20082	4.59741	0.00138034	0.0168219	3.48958	1.28876	1.49653	2.7027	0.851749	1.08151	8.73194	17.1658	13.0304	5.41723
ENSG00000095383.19_2	TBC1D2	chr9:100961281-101018003	-	protein_coding	2.19887	4.59121	0.00258131	0.0230843	3.9542	1.75533	4.77364	2.6665	1.76813	1.21685	18.7419	14.7266	21.877	7.12661
ENSG00000121621.6_2	KIF18A	chr11:28042167-28129855	-	protein_coding	2.19842	4.58977	0.00179174	0.0190997	2.5248	0.32638	0.185967	0.599534	0.134576	0.148421	3.04533	10.9228	2.53807	5.4279
ENSG00000136492.8_2	BRIP1	chr17:59758627-59940882	-	protein_coding	2.19771	4.5875	0.000516781	0.0104172	2.58142	0.38371	0.390838	0.473932	0.160885	0.217558	3.1339	8.76992	3.14142	6.6725
ENSG00000138018.17_2	SELENOI	chr2:26531415-26618759	+	protein_coding	2.19369	4.57475	4.30377e-05	0.00481485	3.60433	1.41064	1.71777	1.79918	1.55196	1.57311	8.12173	16.2803	12.4745	9.30163
ENSG00000230943.1_3	LINC02541	chr6:113944737-113971276	-	lincRNA	2.19362	4.57452	0.000328746	0.0089268	2.23322	0.0396053	0	0.116065	0	0	3.77558	4.57108	5.92621	1.65222
ENSG00000176890.15_2	TYMS	chr18:657604-673578	+	protein_coding	2.18633	4.55146	0.00626661	0.036443	4.08556	1.89923	2.02613	4.68474	3.29271	1.62161	9.36176	18.8255	9.13669	38.8975
ENSG00000189366.9_2	ALG1L	chr3:125648118-125655882	-	protein_coding	2.18265	4.53986	1.75993e-06	0.00208233	2.18265	0	0	0	0	0	3.00035	4.52704	2.91478	3.90765
ENSG00000111057.10_3	KRT18	chr12:53342655-53346685	+	protein_coding	2.17901	4.52842	0.0458389	0.121551	4.18163	2.00262	2.21597	7.14692	1.64425	2.72206	14.1965	63.4463	3.58555	23.1461
ENSG00000144063.3_2	MALL	chr2:110841447-110874143	-	protein_coding	2.17622	4.51968	0.0266594	0.0866886	3.44992	1.2737	1.82649	3.98923	0.493702	0.62233	10.7241	2.29896	13.1201	25.111
ENSG00000170425.3_2	ADORA2B	chr17:15848231-15879060	+	protein_coding	2.17176	4.50573	2.84732e-05	0.0040839	2.45518	0.283423	0.394218	0.245701	0.152613	0.0960932	4.85947	6.43062	3.95801	3.18933
ENSG00000223572.9_2	CKMT1A	chr15:43985084-43991420	+	protein_coding	2.16746	4.49233	0.000106378	0.0059213	2.36819	0.20073	0.151432	0.245299	0.148815	0.0591085	7.33098	3.09846	3.25625	3.88926
ENSG00000143476.17_2	DTL	chr1:212208895-212280742	+	protein_coding	2.16444	4.48293	0.00135432	0.0166749	2.35044	0.185994	0.221018	0.251306	0.0472984	0.0466536	2.18759	7.08735	2.2873	6.98178
ENSG00000087586.17_2	AURKA	chr20:54944445-54967393	-	protein_coding	2.157	4.45985	0.000557315	0.0107965	2.7937	0.636705	0.684177	0.661597	0.445756	0.444309	4.31881	11.7748	3.76937	6.13382
ENSG00000084207.15_2	GSTP1	chr11:67351066-67354131	+	protein_coding	2.15555	4.4554	0.000103274	0.00582129	6.3385	4.18294	20.5761	19.6827	14.1926	15.0529	73.4486	119.694	74.9637	61.8293
ENSG00000117399.13_2	CDC20	chr1:43824626-43828874	+	protein_coding	2.15547	4.45513	0.00845657	0.0431901	2.30573	0.15026	0	0.323019	0.146477	0	1.65604	13.4626	2.11023	4.00147
ENSG00000196584.2_2	XRCC2	chr7:152341864-152373250	-	protein_coding	2.15531	4.45465	3.72878e-06	0.00223152	2.82542	0.670104	0.63516	0.67156	0.474028	0.591101	4.71177	7.71593	5.75158	6.51018
ENSG00000140254.12_3	DUOXA1	chr15:45409565-45422136	-	protein_coding	2.15411	4.45094	0.00193697	0.0198715	2.52011	0.366006	0.35998	0.700422	0.117696	0.067337	8.30763	1.71206	5.97492	5.14954
ENSG00000169860.6_2	P2RY1	chr3:152552482-152559228	+	protein_coding	2.14937	4.43635	0.00123206	0.0159348	3.2478	1.09842	1.72448	1.40646	0.720283	0.863663	17.6787	7.34882	5.16634	7.46712
ENSG00000068489.12_3	PRR11	chr17:57232860-57282066	+	protein_coding	2.14148	4.41214	0.00593478	0.0353449	2.61565	0.474172	0.233386	0.643189	0.253979	0.465153	2.08701	13.1508	2.8857	7.31318
ENSG00000147883.10_2	CDKN2B	chr9:22002902-22009362	-	protein_coding	2.14097	4.41058	0.0028635	0.02426	4.31703	2.17606	6.0033	3.98445	2.72357	2.20895	34.0379	12.8971	25.524	11.2215
ENSG00000165949.12_3	IFI27	chr14:94571182-94583035	+	protein_coding	2.13715	4.39891	0.000431429	0.00984019	3.55581	1.41867	2.52304	2.07291	0.887972	1.49909	7.73813	9.59842	10.0241	17.7336
ENSG00000091409.14_3	ITGA6	chr2:173292082-173371010	+	protein_coding	2.13673	4.39766	0.00511427	0.0325553	5.97016	3.83343	20.9172	14.0697	10.344	10.0218	51.6975	84.4981	117.07	28.034
ENSG00000132698.14_3	RAB25	chr1:156030951-156040305	+	protein_coding	2.13447	4.39077	0.00250777	0.0227629	2.52478	0.390304	0.35979	1.17021	0	0	4.84906	5.02363	2.14973	8.88364
ENSG00000269989.1_4	AC036176.3	chr18:61152834-61153251	+	sense_intronic	2.13311	4.38663	0.0031724	0.0253872	2.26585	0.132735	0.13632	0.271536	0	0	2.77555	2.43761	11.0191	2.42959
ENSG00000121211.7_3	MND1	chr4:154265801-154336270	+	protein_coding	2.13255	4.38491	0.00603648	0.0357358	2.98798	0.855432	0.552071	0.665534	0.838433	1.25491	4.71284	18.5777	2.90058	8.08114
ENSG00000142627.12_2	EPHA2	chr1:16450832-16482582	-	protein_coding	2.13153	4.38181	0.00118267	0.0155613	3.60976	1.47823	2.27559	2.45078	1.60589	1.04551	11.9281	11.7285	5.70342	19.1359
ENSG00000142657.20_3	PGD	chr1:10458649-10480201	+	protein_coding	2.13103	4.38029	0.00337907	0.0262523	6.73681	4.60579	50.3854	29.6037	13.484	14.4318	124.829	119.547	101.419	82.2945
ENSG00000225548.5_2	LINC01980	chr3:27844253-27932792	+	lincRNA	2.1306	4.37898	0.00202281	0.0203326	2.1306	0	0	0	0	0	1.18372	7.33641	4.41481	2.73022
ENSG00000215033.3	AL603965.1	chr10:47746962-47770871	+	protein_coding	2.12877	4.37345	0.000528557	0.0104844	2.24312	0.114352	0	0.373074	0	0	7.15228	2.28138	4.13793	2.65482
ENSG00000171848.14_3	RRM2	chr2:10260825-10271546	+	protein_coding	2.12481	4.36145	0.00171178	0.0187582	2.5605	0.435689	0.509576	0.747109	0.15553	0.0981596	3.45494	10.153	2.57335	5.82079
ENSG00000188643.10_2	S100A16	chr1:153579362-153585621	-	protein_coding	2.12427	4.35983	0.00566982	0.0345182	5.67453	3.55025	11.7891	19.6568	7.23998	7.65175	36.2464	54.6539	29.5058	106.609
ENSG00000100290.2_2	BIK	chr22:43506754-43525718	+	protein_coding	2.12278	4.35533	0.0154515	0.0614469	2.29521	0.172431	0.120804	0.244816	0.156094	0	2.15741	15.7695	1.28007	3.80743
ENSG00000188042.7_3	ARL4C	chr2:235401685-235405697	-	protein_coding	2.12148	4.3514	0.00021577	0.00763727	5.28138	3.1599	11.2687	8.42467	6.23751	6.62513	48.5867	48.5713	27.9602	31.1379
ENSG00000278828.1_2	HIST1H3H	chr6:27777842-27779078	+	protein_coding	2.12146	4.35135	0.00124397	0.0160217	3.20766	1.0862	2.59778	0.730734	0.55524	1.09824	7.41199	10.0454	4.88638	12.3193
ENSG00000186185.13_2	KIF18B	chr17:43002077-43025079	-	protein_coding	2.1207	4.34906	0.00343032	0.0264252	2.23751	0.116809	0.0739455	0.287271	0	0	2.09398	10.6449	2.24585	3.22917
ENSG00000133477.16_2	FAM83F	chr22:40390953-40439533	+	protein_coding	2.1191	4.34423	2.5467e-06	0.00208414	2.30528	0.186182	0.285494	0.200277	0.0642664	0.0204309	4.72398	3.26366	4.3248	3.59255
ENSG00000158089.14_2	GALNT14	chr2:31133333-31378068	-	protein_coding	2.11769	4.33998	5.45373e-06	0.00254093	2.28549	0.167806	0.311835	0.170469	0	0.0370969	4.55504	4.21046	2.92623	3.97129
ENSG00000100162.14_2	CENPM	chr22:42334725-42343168	-	protein_coding	2.11408	4.32914	0.00148722	0.0174918	2.26649	0.152404	0.126448	0.293265	0	0.0474028	2.11092	8.31532	2.25239	4.68632
ENSG00000087510.6_2	TFAP2C	chr20:55204358-55214339	+	protein_coding	2.1126	4.3247	0.00171019	0.0187582	2.85079	0.738186	0.319331	1.4033	0.632283	0.495915	3.09122	4.74036	9.51883	9.96297
ENSG00000010278.12_3	CD9	chr12:6308881-6347437	+	protein_coding	2.10993	4.31671	2.96688e-05	0.00412322	6.28543	4.17549	13.0563	18.8373	16.8042	20.4745	98.6103	77.7746	63.1874	72.497
ENSG00000130762.14_3	ARHGEF16	chr1:3370990-3397677	+	protein_coding	2.10739	4.30911	8.1064e-05	0.00557312	2.76979	0.662395	0.834069	0.850583	0.368766	0.35067	7.61371	7.27335	4.08396	4.97146
ENSG00000188883.4_2	KLRG2	chr7:139137436-139168458	-	protein_coding	2.10693	4.30774	0.00351137	0.0267288	2.45915	0.352221	0.909799	0.261038	0.044682	0.055398	6.4121	2.07991	2.87501	9.33624
ENSG00000160446.18_3	ZDHHC12	chr9:131483148-131486406	-	protein_coding	2.10652	4.3065	4.83157e-05	0.00491432	3.22588	1.11937	0.549047	1.42248	1.14174	1.77178	7.63285	8.87579	10.0058	7.16585
ENSG00000203499.11_4	IQANK1	chr8:144816310-144872814	+	protein_coding	2.1062	4.30556	0.00288495	0.0243313	2.22252	0.116323	0.0877653	0.154667	0.0642236	0.0328599	9.32349	1.64955	4.26022	2.29747
ENSG00000120756.12_3	PLS1	chr3:142315229-142432506	+	protein_coding	2.10334	4.29703	0.020395	0.0732248	2.65955	0.556207	0.574778	1.00522	0.200384	0.233211	8.15486	16.4393	1.13656	3.67216
ENSG00000155918.7_2	RAET1L	chr6:150339470-150346668	-	protein_coding	2.0981	4.28145	0.00279154	0.0239865	2.39831	0.300208	0	0.95721	0.17449	0	7.08453	1.92262	3.09724	6.9787
ENSG00000129235.10_2	TXNDC17	chr17:6544078-6547861	+	protein_coding	2.09595	4.27508	0.000829467	0.0130608	3.14224	1.04629	0.890808	1.74421	1.07251	0.691596	5.58889	12.6102	4.76716	10.7489
ENSG00000112655.15_3	PTK7	chr6:43044006-43129457	+	protein_coding	2.09451	4.27082	0.000102771	0.00582129	3.3843	1.28978	1.66674	1.04868	1.37491	1.75393	12.2658	6.54998	12.4649	7.81491
ENSG00000011426.10_3	ANLN	chr7:36429415-36493400	+	protein_coding	2.09437	4.2704	0.00855007	0.0434154	4.29378	2.19941	1.24155	6.13313	3.63469	5.00489	13.8007	43.8618	12.4696	15.5468
ENSG00000065328.16_2	MCM10	chr10:13203554-13253104	+	protein_coding	2.0918	4.26279	0.000884619	0.0134012	2.30893	0.217133	0.224803	0.369465	0.0885207	0	2.9532	7.93553	2.12259	4.46568
ENSG00000137203.10_2	TFAP2A	chr6:10393419-10419892	-	protein_coding	2.09175	4.26265	0.00101536	0.0144544	2.40449	0.312743	0.110739	0.375094	0.266882	0.229983	4.76623	1.67309	5.22005	7.19595
ENSG00000123219.12_3	CENPK	chr5:64813593-64858998	-	protein_coding	2.09092	4.26019	8.89473e-05	0.00562156	2.49844	0.407521	0.620524	0.364491	0.109867	0.261268	5.19051	5.79327	2.78715	5.40183
ENSG00000105357.15_3	MYH14	chr19:50691443-50813802	+	protein_coding	2.09028	4.25831	0.00216621	0.0210826	5.03929	2.94901	5.77049	11.3959	6.05764	5.00349	55.4328	40.4176	22.3977	20.3806
ENSG00000094804.9_2	CDC6	chr17:38443885-38460909	+	protein_coding	2.08988	4.25713	0.00129495	0.0163477	2.51809	0.428207	0.517643	0.47388	0.233068	0.188487	3.56628	9.68303	2.37453	5.54048
ENSG00000109861.15_2	CTSC	chr11:88026760-88070955	-	protein_coding	2.08738	4.24977	0.00546969	0.0338044	3.81459	1.7272	5.42146	2.89006	1.10196	1.28847	7.5582	24.1013	11.7101	13.3547
ENSG00000108846.15_2	ABCC3	chr17:48712138-48769613	+	protein_coding	2.08376	4.2391	0.00154026	0.0178382	2.34968	0.265921	0.504462	0.209346	0.0594824	0.0843649	2.60853	5.79671	7.87246	2.10185
ENSG00000233901.5_2	LINC01503	chr9:132094579-132121817	+	lincRNA	2.07887	4.22477	0.000876721	0.0133356	2.41335	0.334473	0.44285	0.224166	0.310666	0.091922	5.62846	7.78262	3.48631	2.08341
ENSG00000168496.3_3	FEN1	chr11:61560109-61564716	+	protein_coding	2.07879	4.22454	0.000698945	0.0120414	3.73764	1.65884	1.88185	2.71284	1.6395	2.52002	10.8352	22.8146	7.69778	11.9162
ENSG00000019549.9_2	SNAI2	chr8:49830327-49834299	-	protein_coding	2.07828	4.22304	0.00133943	0.0165863	4.95999	2.88171	8.83792	6.06863	6.16742	4.91995	36.8793	42.5921	35.3648	14.629
ENSG00000164109.13_2	MAD2L1	chr4:120976763-120988229	-	protein_coding	2.07806	4.22238	0.00173139	0.0188174	2.6646	0.58654	0.459775	0.627627	0.376192	0.555052	3.57553	8.46928	2.56278	9.46998
ENSG00000175164.13_3	ABO	chr9:136125788-136150630	-	protein_coding	2.07451	4.21201	0.0408389	0.113119	3.18198	1.10747	1.12023	2.60972	1.0598	0.367244	17.2036	11.0776	14.6888	0.966781
ENSG00000213903.8_3	LTB4R	chr14:24780656-24787242	+	protein_coding	2.07264	4.20654	0.00340729	0.0263617	2.74638	0.673746	1.96246	0.460553	0.238937	0.207959	4.25409	3.47994	11.3876	5.95372
ENSG00000125285.5_3	SOX21	chr13:95361876-95364653	-	protein_coding	2.07061	4.20064	0.00283634	0.0241709	2.4295	0.35889	0.128094	1.29371	0	0.045354	7.40943	5.03788	1.91735	4.68553
ENSG00000104951.15_3	IL4I1	chr19:50392911-50432796	-	protein_coding	2.06928	4.19678	0.00777598	0.0411975	2.84484	0.775562	1.75085	0.591818	0.541543	0.272193	5.9632	2.05285	7.52863	13.6939
ENSG00000182107.6_3	TMEM30B	chr14:61744088-61748558	-	protein_coding	2.06755	4.19174	0.0143755	0.0588999	3.45281	1.38526	5.10369	1.94118	0.619423	0.601567	11.5973	21.5853	5.79667	6.43354
ENSG00000262979.1_4	AC124319.1	chr17:78289451-78290433	+	sense_intronic	2.06659	4.18894	0.00125037	0.0160511	3.76725	1.70067	3.67492	2.03268	1.31638	2.39934	12.6025	7.51512	22.076	11.8604
ENSG00000169035.11_2	KLK7	chr19:51479738-51487355	-	protein_coding	2.06643	4.18849	0.0354958	0.103427	2.58423	0.5178	0.666327	0.246242	0.833195	0.103881	2.72813	0.868098	8.44986	18.6521
ENSG00000165105.9_2	RASEF	chr9:85594500-85678092	-	protein_coding	2.06544	4.1856	0.00591693	0.0352928	2.47919	0.413753	0.398733	0.832208	0.115894	0.101223	4.87699	12.1917	3.33942	1.87311
ENSG00000108352.11_4	RAPGEFL1	chr17:38333263-38351908	+	protein_coding	2.05291	4.14942	0.00174576	0.0188794	2.36917	0.31626	0.477277	0.369292	0.11741	0.0632708	9.02602	3.90544	1.90708	3.9831
ENSG00000135127.11_3	BICDL1	chr12:120427673-120532298	+	protein_coding	2.05107	4.14413	0.000469629	0.0100238	2.61156	0.56049	0.368669	0.925605	0.394677	0.286939	4.73256	6.33985	2.74295	7.85893
ENSG00000128641.18_2	MYO1B	chr2:192109911-192290115	+	protein_coding	2.0504	4.1422	0.00656232	0.0373845	4.57681	2.52642	6.33	5.72569	4.30553	3.21251	14.7453	28.6122	53.1657	11.8437
ENSG00000184445.11_3	KNTC1	chr12:123011793-123110943	+	protein_coding	2.05011	4.14136	0.00010345	0.00582129	3.39022	1.34012	1.65906	1.907	1.16984	1.44941	7.46531	13.666	7.02697	11.1263
ENSG00000140534.13_3	TICRR	chr15:90118713-90174287	+	protein_coding	2.0498	4.14048	0.000212164	0.00760891	2.18877	0.138969	0.068004	0.297562	0.0352103	0.0247213	2.48948	6.41351	2.74109	3.46434
ENSG00000154227.13_3	CERS3	chr15:100940600-101085200	-	protein_coding	2.04838	4.13642	0.0278111	0.0888836	2.23065	0.182269	0.0900235	0.472065	0	0.0330261	4.69105	0.135083	7.27479	8.07814
ENSG00000164142.15_3	FAM160A1	chr4:152330368-152584784	+	protein_coding	2.04767	4.13438	0.000120013	0.00609218	3.16039	1.11272	0.584903	1.78537	1.11709	1.34004	7.13298	9.23835	10.1593	5.87658
ENSG00000134317.17_2	GRHL1	chr2:10091822-10142405	+	protein_coding	2.04437	4.12493	0.0152834	0.0610872	3.05603	1.01166	1.14246	2.33094	0.774456	0.305009	9.71954	2.21686	6.26222	18.105
ENSG00000107731.12_2	UNC5B	chr10:72972327-73062621	+	protein_coding	2.04193	4.11796	5.41744e-05	0.00503952	2.61127	0.569343	0.443422	0.621647	0.383819	0.496677	7.55646	3.73411	5.75067	4.09808
ENSG00000137857.17_2	DUOX1	chr15:45422131-45457774	+	protein_coding	2.0418	4.1176	0.00178172	0.0190655	2.29842	0.25662	0.301604	0.432174	0.0175269	0.0739413	5.67773	1.31392	5.51906	4.81317
ENSG00000102890.14_2	ELMO3	chr16:67233014-67237932	+	protein_coding	2.04041	4.11363	5.58159e-05	0.00503952	2.24716	0.206749	0.405043	0.163208	0	0.0854338	4.248	2.74028	5.34335	3.07975
ENSG00000041982.15_3	TNC	chr9:117781857-117880536	-	protein_coding	2.03804	4.10686	0.0174906	0.0664034	5.58594	3.54791	4.2866	22.004	8.53665	15.1335	20.7753	60.0044	85.8558	45.1342
ENSG00000183010.16_3	PYCR1	chr17:79890260-79900288	-	protein_coding	2.03214	4.09011	0.00333129	0.0260348	2.85003	0.817886	1.0745	1.12372	0.67809	0.306195	13.2716	7.87797	4.08703	3.19298
ENSG00000146070.16_2	PLA2G7	chr6:46671938-46703430	-	protein_coding	2.03194	4.08953	0.011221	0.0508135	3.81249	1.78056	7.96277	1.45959	1.52306	1.5048	19.7261	8.71358	8.37309	19.6499
ENSG00000163535.17_4	SGO2	chr2:201374731-201448505	+	protein_coding	2.03146	4.0882	0.00218504	0.0211806	3.5018	1.47034	1.60389	2.46485	1.67424	1.44318	5.39277	20.1287	13.115	7.6367
ENSG00000197930.12_3	ERO1A	chr14:53106634-53162618	-	protein_coding	2.03016	4.08449	0.00380244	0.0277493	5.44298	3.41282	12.8197	12.9259	6.45322	7.96969	21.6475	41.5109	43.9868	81.6782
ENSG00000174564.12_3	IL20RB	chr3:136665072-136729927	+	protein_coding	2.02806	4.07857	0.0304147	0.0939826	3.08894	1.06088	0.942701	2.86487	0.590389	0.586285	3.30692	15.6779	2.55749	19.5118
ENSG00000005001.9_2	PRSS22	chr16:2902728-2908171	-	protein_coding	2.0277	4.07756	2.91822e-05	0.00411202	2.27237	0.244661	0.339444	0.440706	0.0211767	0	3.94487	4.07057	2.83046	4.67204
ENSG00000181649.5_2	PHLDA2	chr11:2949503-2950685	-	protein_coding	2.02705	4.0757	0.000696069	0.0120414	2.70194	0.674897	0.740759	1.26443	0.304869	0.262966	5.93269	9.23483	3.62426	4.46309
ENSG00000111319.12_3	SCNN1A	chr12:6456009-6486896	-	protein_coding	2.02577	4.07209	0.0497355	0.127956	2.63966	0.613888	0.42052	2.17703	0.154049	0.0531806	5.36741	15.697	0.497356	8.4741
ENSG00000182718.16_3	ANXA2	chr15:60639333-60695082	-	protein_coding	2.02523	4.07058	0.00402062	0.0285411	5.99187	3.96664	29.1978	16.5208	10.0837	9.1881	43.6814	103.898	65.0469	51.9893
ENSG00000102007.10_2	PLP2	chrX:49028273-49031588	+	protein_coding	2.02377	4.06646	0.000786201	0.0127751	4.46447	2.4407	7.10311	4.07083	3.12407	4.12672	12.9452	25.5611	19.7303	29.9374
ENSG00000182795.12_2	C1orf116	chr1:207191866-207206101	-	protein_coding	2.02366	4.06613	0.00837876	0.0429495	2.70054	0.676887	0.49035	2.49293	0.168859	0.0735285	6.77049	2.77005	4.24021	10.6315
ENSG00000163624.5_2	CDS1	chr4:85504132-85572491	+	protein_coding	2.01848	4.05156	0.000256253	0.00814223	3.39139	1.37292	1.31747	2.14479	1.48324	1.48618	15.6418	6.94443	7.33366	10.0039
ENSG00000268328.1	AC019206.1	chr2:70129482-70129841	-	protein_coding	2.01841	4.05137	0.000115868	0.00600127	2.35091	0.332503	0	0.644626	0	0.528645	4.72511	3.00063	4.19064	4.69703
ENSG00000121858.10_2	TNFSF10	chr3:172223298-172241297	-	protein_coding	2.01756	4.04899	0.0108063	0.049767	5.67542	3.65786	25.943	11.4857	6.68833	8.81314	51.6566	22.7142	65.5272	81.116
ENSG00000173156.6_2	RHOD	chr11:66824289-66839484	+	protein_coding	2.01719	4.04794	0.00011838	0.00607571	3.06981	1.05262	0.934908	1.63025	0.745279	1.08432	4.98606	6.88857	10.0913	8.49074
ENSG00000188157.14_3	AGRN	chr1:955503-991498	+	protein_coding	2.01457	4.04061	5.48082e-05	0.00503952	3.47997	1.4654	2.02803	2.11294	1.33325	1.64376	11.8781	8.23581	13.5692	7.94414
ENSG00000183742.12_3	MACC1	chr7:20174278-20257027	-	protein_coding	2.01447	4.04032	0.00713876	0.0391591	2.52006	0.505596	0.332922	1.34244	0.155847	0.125706	8.27106	6.4366	1.35484	5.66799
ENSG00000101935.9_3	AMMECR1	chrX:109437414-109683461	-	protein_coding	2.01441	4.04014	0.000545695	0.0106782	2.92482	0.910415	1.19431	1.39729	0.59384	0.488624	5.41202	11.1689	4.46639	6.79629
ENSG00000166396.12_3	SERPINB7	chr18:61420169-61472610	+	protein_coding	2.01431	4.03986	8.81014e-05	0.00562156	2.03905	0.024746	0	0.071019	0	0	4.33024	4.31447	2.20726	2.13995
ENSG00000197299.10_2	BLM	chr15:91260558-91359395	+	protein_coding	2.01197	4.03333	0.0009714	0.0141773	2.29127	0.279298	0.381062	0.290675	0.110273	0.0960968	2.48056	6.74886	2.17996	5.69352
ENSG00000168453.14_3	HR	chr8:21971928-21990897	-	protein_coding	2.00816	4.02268	0.00184085	0.0193648	2.76084	0.752686	0.904169	0.764121	0.835562	0.307138	3.86106	3.23986	11.4955	7.19501
ENSG00000104369.4_2	JPH1	chr8:75146935-75233563	-	protein_coding	2.00618	4.01717	0.00346385	0.0265921	2.68386	0.677683	0.177954	1.80355	0.556435	0.27363	7.92551	8.22655	2.5268	4.87001
ENSG00000253746.1_3	AC091182.2	chr8:37262957-37264242	-	lincRNA	1.99951	3.99864	0.00374555	0.0275861	2.0233	0.02379	0	0.068184	0	0	3.78406	6.52752	3.26571	0.777688
ENSG00000166803.11_3	PCLAF	chr15:64656510-64679886	-	protein_coding	1.99858	3.99608	0.000518397	0.0104403	2.13179	0.133206	0.224755	0.0471357	0.0135101	0.113053	2.92948	5.43026	1.61234	4.58905
ENSG00000145555.14_4	MYO10	chr5:16662023-16936385	-	protein_coding	1.99655	3.99044	0.000842122	0.0131111	3.84554	1.849	2.99286	3.32245	2.31734	1.94177	13.6772	16.9817	19.2708	6.98267
ENSG00000171241.8_2	SHCBP1	chr16:46614466-46655538	-	protein_coding	1.99363	3.98238	0.000254809	0.00814223	2.34171	0.348078	0.412294	0.228738	0.246014	0.214005	2.69268	5.80066	2.77767	5.95958
ENSG00000225783.6_3	MIAT	chr22:27042392-27072438	+	lincRNA	1.99095	3.97498	0.00518103	0.0327381	2.23383	0.242881	0.226959	0.391567	0.040769	0.103492	1.66199	2.16425	9.84534	4.3589
ENSG00000095970.16_2	TREM2	chr6:41126244-41130924	-	protein_coding	1.99052	3.97381	0.00332896	0.0260348	2.41462	0.4241	1.23328	0.120643	0.0887316	0.189425	7.92029	1.82906	4.2598	5.08845
ENSG00000188112.8_2	C6orf132	chr6:42068856-42110357	-	protein_coding	1.98808	3.96708	0.0423332	0.115541	3.71799	1.72991	4.46751	7.50016	0.581445	0.647229	14.7029	4.50516	12.132	25.4137
ENSG00000145545.11_2	SRD5A1	chr5:6633456-6674499	+	protein_coding	1.98752	3.96554	0.00288179	0.0243137	2.66744	0.67992	0.334094	0.899876	0.472394	0.765101	7.74546	2.04995	9.43201	4.85424
ENSG00000160886.13_3	LY6K	chr8:143781529-143786545	+	protein_coding	1.98366	3.95494	0.00739546	0.0399582	2.27997	0.296317	0.435106	0.282589	0.119072	0.104007	4.76782	10.0368	3.05421	1.15575
ENSG00000177494.5_2	ZBED2	chr3:111311747-111314290	-	protein_coding	1.98347	3.95444	0.00106205	0.0148293	2.2296	0.246125	0.098794	0.624043	0	0.108792	2.04306	2.73764	4.49092	6.7473
ENSG00000258815.1_3	AC131532.1	chr12:85711838-85736690	+	lincRNA	1.98305	3.95328	0.0407771	0.113051	1.98305	0	0	0	0	0	2.85858	3.84732	0	12.0588
ENSG00000115112.7_2	TFCP2L1	chr2:121974163-122042783	-	protein_coding	1.98092	3.94744	0.0128099	0.0550241	2.2028	0.221882	0.227441	0.403558	0.0371075	0.035423	3.3165	1.77137	12.9589	1.69003
ENSG00000176208.8_2	ATAD5	chr17:29158988-29222887	+	protein_coding	1.97857	3.94103	0.000115734	0.00600127	3.24752	1.26894	1.29826	1.8749	1.25496	1.26359	6.44525	12.0729	6.46493	10.1975
ENSG00000197903.7_2	HIST1H2BK	chr6:27114197-27114577	-	protein_coding	1.97797	3.93938	0.00795311	0.0416454	5.70382	3.72585	25.6517	12.6074	7.75692	8.64982	66.0081	54.2235	24.7652	76.4102
ENSG00000163399.15_2	ATP1A1	chr1:116915290-116952883	+	protein_coding	1.9711	3.92068	0.000180348	0.00716746	5.85586	3.88475	19.2788	14.7694	11.8713	10.5672	50.7214	67.9574	69.7457	43.5864
ENSG00000164930.11_2	FZD6	chr8:104310661-104345094	+	protein_coding	1.9704	3.91876	0.000292891	0.00850283	5.08145	3.11105	4.87555	9.06268	7.80679	9.70292	35.445	40.3101	35.9011	22.6562
ENSG00000062716.12_3	VMP1	chr17:57784553-57919616	+	protein_coding	1.96939	3.91603	0.018303	0.0682735	6.50704	4.53765	47.6614	13.2325	26.3721	14.3497	83.4193	170.831	118.479	38.484
ENSG00000091651.8_3	ORC6	chr16:46723555-46732306	+	protein_coding	1.96744	3.91073	7.89078e-06	0.00271703	2.26222	0.294779	0.118562	0.318037	0.187697	0.293173	2.94161	5.04957	3.58701	3.8423
ENSG00000251026.1_2	LINC02163	chr5:103415612-103441104	+	lincRNA	1.96588	3.90651	0.0136247	0.0570672	2.12378	0.157898	0	0.549274	0	0	6.596	8.09496	1.65253	0.968953
ENSG00000139618.14_3	BRCA2	chr13:32889611-32974403	+	protein_coding	1.96531	3.90498	0.00758166	0.0406031	2.57703	0.611719	0.95254	0.740566	0.184186	0.354794	2.91654	12.1704	2.16709	6.76064
ENSG00000129455.15_3	KLK8	chr19:51499263-51505967	-	protein_coding	1.96098	3.89327	0.0211203	0.0749513	2.15396	0.192971	0.327365	0.221225	0.0533549	0	4.77668	3.58833	0.365918	9.83585
ENSG00000091129.19_3	NRCAM	chr7:107788068-108097161	-	protein_coding	1.95861	3.88688	0.0340554	0.100734	2.74337	0.784753	0.342255	1.21474	0.913054	0.548997	0.920678	17.4604	4.49744	9.31539
ENSG00000198554.11_3	WDHD1	chr14:55405668-55493823	-	protein_coding	1.95828	3.88599	0.000465505	0.0100238	3.2086	1.25032	1.05101	1.74771	1.26666	1.50733	7.99456	14.0404	5.04417	7.93238
ENSG00000189431.7_2	RASSF10	chr11:13031124-13033653	+	protein_coding	1.95582	3.87937	0.0198324	0.0720021	2.41705	0.461228	0.153367	1.04692	0.194932	0.273394	0.680598	8.78837	8.27768	4.33096
ENSG00000058804.11_2	NDC1	chr1:54231133-54304533	-	protein_coding	1.95243	3.87025	0.00114131	0.015319	3.0638	1.11138	1.4701	1.20894	1.12849	0.876134	7.22974	14.8025	4.62919	5.67776
ENSG00000162552.14_2	WNT4	chr1:22443798-22470462	-	protein_coding	1.9511	3.8667	0.00295079	0.0245639	2.1623	0.211199	0.229307	0.172441	0.160156	0.0740921	8.56838	1.82891	3.83667	2.06667
ENSG00000275221.1_2	HIST1H2AK	chr6:27805725-27806117	-	protein_coding	1.95056	3.86524	0.0107182	0.0495311	3.11137	1.16081	0.292942	1.14561	2.33846	1.69822	4.60907	11.7544	3.67208	15.6878
ENSG00000126709.14_2	IFI6	chr1:27992572-27998729	-	protein_coding	1.94894	3.8609	0.0290436	0.0913611	6.21149	4.26255	43.8987	17.7301	10.541	12.9832	74.6851	36.2203	51.7048	202.113
ENSG00000180806.4_3	HOXC9	chr12:54388679-54397121	+	protein_coding	1.94771	3.85762	0.00197567	0.0201035	2.0897	0.141993	0.0657975	0.390919	0	0	1.14516	4.86498	3.13387	5.31206
ENSG00000179750.15_3	APOBEC3B	chr22:39378352-39388809	+	protein_coding	1.94437	3.8487	0.00321363	0.0255768	2.3629	0.41853	1.27872	0.285403	0	0.0895079	1.71848	4.85639	5.22101	6.06969
ENSG00000157168.18_1	NRG1	chr8:31496902-32625477	+	protein_coding	1.94341	3.84615	0.0195849	0.0713467	2.07059	0.127175	0.10879	0.134484	0.0799299	0.0473492	1.51235	10.9125	4.79798	0.794223
ENSG00000153246.12_3	PLA2R1	chr2:160788517-160919121	-	protein_coding	1.94333	3.84594	0.00409233	0.0288084	3.81381	1.87047	3.54379	2.86301	1.96297	2.43715	21.19	9.02064	22.4112	6.51281
ENSG00000096433.10_2	ITPR3	chr6:33588142-33664351	+	protein_coding	1.94244	3.84356	0.0028607	0.0242455	4.3829	2.44046	9.31457	4.65737	3.12972	2.60266	25.9324	12.5284	21.383	22.2329
ENSG00000136542.8_2	GALNT5	chr2:158114110-158170723	+	protein_coding	1.94168	3.84154	0.0277276	0.0887826	2.41137	0.469688	0.29988	0.63104	0.383345	0.253898	18.7697	2.09058	1.54367	4.1532
ENSG00000215845.10_4	TSTD1	chr1:161007421-161008780	-	protein_coding	1.93874	3.8337	0.00431543	0.0296729	4.39773	2.45899	9.96585	3.14771	2.88861	4.16738	14.0949	27.0656	14.5121	29.041
ENSG00000173805.15_3	HAP1	chr17:39873994-39890896	-	protein_coding	1.93661	3.82804	0.00178748	0.0190906	2.17742	0.24081	0.129088	0.339678	0.215194	0.0606939	5.42578	6.18847	2.59596	1.52054
ENSG00000279806.1_3	AC018629.1	chr17:38629806-38631541	-	TEC	1.93612	3.82674	0.00220414	0.0212667	1.93919	0.00307351	0	0	0	0.008558	1.33104	2.01735	6.90227	2.89126
ENSG00000165244.6_2	ZNF367	chr9:99148223-99180611	-	protein_coding	1.93375	3.82046	1.4446e-05	0.00302084	2.75191	0.818163	0.678299	1.00301	0.501027	0.915252	5.21461	6.4812	4.56551	6.9568
ENSG00000175130.6_2	MARCKSL1	chr1:32799433-32801980	-	protein_coding	1.93324	3.81913	0.00294414	0.024562	4.42105	2.48781	10.3188	4.63981	4.1666	2.0016	18.9643	19.8057	19.0652	24.2697
ENSG00000198807.12_2	PAX9	chr14:37126773-37148920	+	protein_coding	1.93242	3.81696	0.0289887	0.0912395	2.35865	0.426224	0.797933	0.579056	0.0398047	0.10434	9.53823	1.80671	1.01286	10.6229
ENSG00000181333.11_2	HEPHL1	chr11:93754527-93846917	+	protein_coding	1.9313	3.81398	0.0226022	0.0779596	2.08113	0.149829	0.021176	0.372409	0.047955	0.031537	1.34089	2.66997	1.48674	14.0056
ENSG00000130520.10_3	LSM4	chr19:18417040-18434084	-	protein_coding	1.93052	3.81194	0.0105521	0.0491679	3.85162	1.92109	1.27972	6.32612	1.15461	4.71612	10.9852	22.8332	9.02251	14.1705
ENSG00000043039.6_2	BARX2	chr11:129245835-129322174	+	protein_coding	1.92903	3.80798	0.0331122	0.098798	2.38825	0.459221	0.0783729	2.0844	0.0268215	0.0459779	0.975863	3.27477	5.51582	12.6489
ENSG00000188486.3_3	H2AFX	chr11:118964564-118966177	-	protein_coding	1.92473	3.79665	0.00640294	0.0368792	4.2929	2.36817	6.5777	4.10193	3.5611	3.02926	23.0118	35.2809	7.86606	18.1133
ENSG00000161888.11_3	SPC24	chr19:11242196-11266484	-	protein_coding	1.92471	3.7966	0.00132539	0.0165167	2.81604	0.89133	0.705557	1.70543	0.608338	0.5951	3.54318	8.80786	4.54993	8.9455
ENSG00000162981.13_2	FAM84A	chr2:14772810-14790938	+	protein_coding	1.92465	3.79645	0.000600475	0.0112411	2.76752	0.842872	0.397123	1.72756	0.397132	0.943892	4.57669	6.33192	8.41065	4.58749
ENSG00000231683.6_4	AL033397.1	chr6:53426087-53481969	-	lincRNA	1.92173	3.78876	0.0332507	0.0990659	1.98726	0.0655324	0.0565822	0.0636252	0.0248302	0.0412741	1.43319	4.47022	12.0531	0.422347
ENSG00000136514.2_2	RTP4	chr3:187086120-187089864	+	protein_coding	1.92151	3.7882	0.0325825	0.0978699	2.9082	0.986682	1.84436	0.997992	0.430334	0.897004	6.59483	1.17738	8.66686	18.8645
ENSG00000090104.11_2	RGS1	chr1:192544857-192549161	+	protein_coding	1.91994	3.78407	0.0218969	0.0767576	3.9505	2.03056	1.71428	2.85453	3.4804	4.9442	12.46	4.31376	23.3177	31.8477
ENSG00000075218.18_2	GTSE1	chr22:46692638-46726707	+	protein_coding	1.91954	3.78302	0.00906787	0.044902	2.0576	0.138062	0.240099	0.110657	0.0233789	0.0403284	0.916379	8.25233	1.96333	4.71593
ENSG00000170779.10_2	CDCA4	chr14:105475910-105487485	-	protein_coding	1.91926	3.7823	0.00013842	0.00651228	3.72817	1.80891	2.76948	3.33764	1.72146	2.38692	10.4645	17.7564	11.8961	10.1225
ENSG00000125775.14_3	SDCBP2	chr20:1290553-1309883	-	protein_coding	1.91656	3.77521	0.0100855	0.0478096	2.93092	1.01436	1.31804	1.89526	0.771021	0.400824	5.74398	3.86444	4.25863	18.6045
ENSG00000109854.13_2	HTATIP2	chr11:20385231-20405329	+	protein_coding	1.9164	3.7748	0.000993451	0.0143225	4.00254	2.08614	4.28239	4.04296	2.32438	2.67058	10.7941	26.9804	13.3872	12.9009
ENSG00000267327.1_3	AC009271.1	chr18:53560269-53690753	+	lincRNA	1.91592	3.77355	1.62993e-05	0.00319909	2.23376	0.31784	0.0735964	0.464572	0.287707	0.192199	4.76315	2.92343	3.32745	4.00221
ENSG00000242125.3_3	SNHG3	chr1:28832492-28837404	+	sense_intronic	1.91565	3.77284	0.00112724	0.0152687	3.66632	1.75066	5.2924	1.96131	1.36301	1.91235	14.8462	10.4554	10.4987	11.448
ENSG00000074181.8_2	NOTCH3	chr19:15269849-15311792	-	protein_coding	1.91524	3.77177	0.0021218	0.0208599	3.60178	1.68654	2.93822	2.75436	1.49474	1.91026	7.93647	9.10147	23.4108	8.85916
ENSG00000165891.15_3	E2F7	chr12:77415027-77459360	-	protein_coding	1.91437	3.76948	0.00278327	0.0239522	2.11042	0.196058	0.11728	0.353549	0.0675076	0.0667681	1.39167	7.72956	3.08758	3.0742
ENSG00000008282.8_2	SYPL1	chr7:105730949-105753022	-	protein_coding	1.91183	3.76287	0.000453893	0.00999892	4.75115	2.83932	7.75859	6.7089	4.33076	6.28899	37.7328	26.7685	26.5652	16.7404
ENSG00000164251.4_3	F2RL1	chr5:76114758-76131140	+	protein_coding	1.9114	3.76175	0.00900957	0.0447226	2.36233	0.450925	0.957936	0.355467	0.12867	0.165503	2.22361	12.3692	2.64331	3.4523
ENSG00000171617.13_3	ENC1	chr5:73923231-73937249	-	protein_coding	1.90974	3.75741	0.0387964	0.109716	2.94392	1.03418	1.90189	1.3298	0.729664	0.504247	3.16765	31.1833	4.4628	3.78518
ENSG00000175707.8_2	KDF1	chr1:27276053-27286897	-	protein_coding	1.90699	3.75026	1.19753e-07	0.000669868	2.04098	0.133988	0.064209	0.207317	0.054376	0.07027	3.13665	3.41149	2.75981	3.18006
ENSG00000133195.11_3	SLC39A11	chr17:70642088-71088851	-	protein_coding	1.90526	3.74577	0.000987771	0.0142866	2.96508	1.05982	1.89449	1.03131	0.899286	0.691279	10.8377	5.0165	4.3855	8.69345
ENSG00000158373.8_3	HIST1H2BD	chr6:26158374-26171577	+	protein_coding	1.90314	3.74025	0.0027482	0.0237968	5.45611	3.55297	9.06769	14.6189	8.01499	12.3863	52.2784	55.5947	20.4997	56.2862
ENSG00000237289.9_2	CKMT1B	chr15:43885252-43897099	+	protein_coding	1.90116	3.73514	0.000398197	0.0094521	2.21125	0.310086	0.336169	0.496074	0.114126	0.0607954	5.58484	2.94813	2.1389	4.63502
ENSG00000243449.6_3	C4orf48	chr4:2043720-2045697	+	protein_coding	1.89093	3.70873	0.00616442	0.0361153	2.9422	1.05127	2.79452	1.27573	0.457888	0.46506	6.47017	12.7109	3.64567	6.33358
ENSG00000070159.13_2	PTPN3	chr9:112137746-112260593	-	protein_coding	1.88958	3.70528	0.000808123	0.0129525	2.40468	0.515101	0.790636	0.653762	0.223438	0.151281	4.63752	7.43757	2.58983	3.60413
ENSG00000175591.11_3	P2RY2	chr11:72929343-72947397	+	protein_coding	1.88951	3.70509	0.000696292	0.0120414	2.42156	0.532046	1.02718	0.899345	0.102701	0.0296589	4.03951	6.28233	3.73197	3.744
ENSG00000114529.12_3	C3orf52	chr3:111805182-111849851	+	protein_coding	1.88884	3.70338	0.00139906	0.0169394	2.67092	0.782082	0.722223	0.664016	1.2703	0.343972	3.11263	6.8064	9.26695	3.99
ENSG00000111335.12_2	OAS2	chr12:113416200-113449528	+	protein_coding	1.88831	3.70202	0.00338595	0.0262774	3.05428	1.16597	3.21972	1.08226	0.450763	0.988601	6.91245	5.32326	6.1117	12.381
ENSG00000174442.11_2	ZWILCH	chr15:66797297-66842466	+	protein_coding	1.88624	3.69671	3.55141e-05	0.0044404	2.77368	0.887437	1.01598	0.985276	0.710349	0.710761	5.53081	7.34839	4.09565	6.8718
ENSG00000188522.14_3	FAM83G	chr17:18872102-18908117	-	protein_coding	1.88493	3.69335	8.35177e-05	0.00559742	3.0968	1.21187	1.25464	1.84085	1.18216	1.05978	6.765	5.4377	8.6341	10.1232
ENSG00000184992.10_2	BRI3BP	chr12:125478246-125515777	+	protein_coding	1.8838	3.69047	0.00101195	0.0144311	2.61548	0.731677	0.892562	0.779719	0.408938	0.602262	4.96335	10.0906	3.22388	4.04888
ENSG00000159527.3_2	PGLYRP3	chr1:153270338-153283194	-	protein_coding	1.88369	3.69019	0.00326774	0.0257546	1.91249	0.0287973	0	0	0.083117	0	4.7217	0.689601	4.08996	3.08173
ENSG00000114554.11_2	PLXNA1	chr3:126707437-126756235	+	protein_coding	1.87825	3.67628	0.00311733	0.0251154	4.64698	2.76874	4.76767	7.969	5.47217	5.44316	27.0779	10.8583	30.64	36.4027
ENSG00000278978.1_4	AC092611.3	chr4:152590938-152591655	+	TEC	1.8766	3.67208	0.00190633	0.019744	2.43	0.5534	0.38871	0.253368	0.821267	0.463173	3.73654	6.87562	6.71306	1.93113
ENSG00000085840.12_2	ORC1	chr1:52838501-52870131	-	protein_coding	1.87625	3.67121	0.000422277	0.00974556	2.15725	0.280995	0.107682	0.509177	0.06219	0.227422	2.76617	5.81116	2.14148	3.91283
ENSG00000172818.9_2	OVOL1	chr11:65554493-65564690	+	protein_coding	1.87543	3.6691	0.00384716	0.0279209	2.06931	0.193887	0	0.673944	0	0.0226381	4.10591	0.963944	4.91072	4.23431
ENSG00000067225.17_4	PKM	chr15:72491370-72524163	-	protein_coding	1.87257	3.66184	0.000650639	0.0116503	5.47023	3.59766	7.96349	11.6378	11.7181	13.9089	29.7823	61.984	54.1467	35.1212
ENSG00000137309.19_2	HMGA1	chr6:34204650-34214008	+	protein_coding	1.87201	3.66041	0.00959156	0.0464054	4.3385	2.4665	10.0518	4.81957	4.03854	1.8796	24.628	19.3721	10.2047	27.637
ENSG00000140263.13_2	SORD	chr15:45315302-45369383	+	protein_coding	1.86846	3.65142	0.000254084	0.00814223	2.49426	0.625806	0.624968	0.472142	0.324508	0.789354	6.48081	4.74898	2.63604	5.44505
ENSG00000085552.16_2	IGSF9	chr1:159896829-159915394	-	protein_coding	1.86766	3.64941	0.00111939	0.0152072	1.93884	0.071178	0.0696598	0.0821507	0.0450388	0.00702694	3.49555	1.59868	1.77262	5.67073
ENSG00000232536.1_4	AL365436.2	chr1:151512992-151534331	+	sense_intronic	1.86659	3.6467	0.00333651	0.0260665	3.10522	1.23864	1.32817	1.36963	1.15779	1.60473	12.7241	3.01769	10.7001	7.49991
ENSG00000106789.12_2	CORO2A	chr9:100883257-100954922	-	protein_coding	1.86596	3.6451	0.00214508	0.0210049	2.42423	0.558274	0.954223	0.267085	0.333398	0.423932	5.80751	8.08884	3.0618	2.30255
ENSG00000162493.16_3	PDPN	chr1:13909960-13944452	+	protein_coding	1.86418	3.64061	0.0135985	0.0570214	3.55235	1.68817	3.41109	1.65419	3.04021	1.27972	11.9052	5.12118	28.0059	7.26745
ENSG00000163507.13_2	KIAA1524	chr3:108268716-108308491	-	protein_coding	1.86292	3.63743	0.00434263	0.0297782	3.9187	2.05578	1.73193	3.68414	4.0692	3.60644	8.97739	26.1716	8.81957	18.6497
ENSG00000143674.10_2	MAP3K21	chr1:233463514-233520894	+	protein_coding	1.86233	3.63595	0.0111079	0.0504923	2.16797	0.305637	0.330763	0.358562	0.217881	0.0598352	2.13107	11.7978	2.58913	1.83583
ENSG00000157193.15_3	LRP8	chr1:53708036-53793742	-	protein_coding	1.86191	3.6349	0.000982825	0.0142533	2.2266	0.364682	0.301316	0.605709	0.100695	0.195101	1.97715	6.80987	3.90168	3.21017
ENSG00000006118.14_4	TMEM132A	chr11:60691935-60704631	+	protein_coding	1.86129	3.63331	0.000530347	0.0105106	2.23671	0.37542	0.438196	0.316393	0.234439	0.211652	6.07514	2.36653	4.95472	2.47923
ENSG00000275464.4_4	FP565260.1	chr21:45527204-45551063	+	protein_coding	1.86113	3.63293	0.000153355	0.00682169	1.98565	0.124517	0.235755	0.039032	0.067952	0.0299603	3.81108	1.56031	3.64243	3.30209
ENSG00000176619.12_3	LMNB2	chr19:2427636-2456994	-	protein_coding	1.86095	3.63248	0.0024826	0.0226266	4.70108	2.84012	6.34031	7.97074	5.7164	4.94526	20.726	42.1555	13.3675	32.9832
ENSG00000156869.12_2	FRRS1	chr1:100174259-100232187	-	protein_coding	1.86088	3.63229	0.000191033	0.0073155	2.52884	0.667958	1.30983	0.529798	0.224046	0.473293	5.05682	5.88807	3.55494	4.83712
ENSG00000182580.2_2	EPHB3	chr3:184279572-184300197	+	protein_coding	1.86069	3.6318	0.000648586	0.011647	3.17722	1.31653	1.79952	2.36438	1.05468	0.988517	6.14519	5.82099	9.71943	11.8149
ENSG00000266402.3_2	SNHG25	chr17:62223330-62223836	+	lincRNA	1.86022	3.63064	0.00375386	0.0275979	3.07148	1.21125	3.29764	0.216615	1.33052	1.35863	8.38864	9.57115	7.0167	5.27633
ENSG00000167755.14_3	KLK6	chr19:51461887-51472929	-	protein_coding	1.85924	3.62816	0.0228604	0.0785114	1.89113	0.0318963	0.0433535	0.0470694	0	0	4.89712	2.38356	0.172746	7.08973
ENSG00000124766.6_3	SOX4	chr6:21592999-21598850	+	protein_coding	1.85697	3.62245	0.00110603	0.0151243	4.46693	2.60996	6.05967	6.59629	4.15857	4.02098	33.4076	15.1611	14.8516	26.1341
ENSG00000129474.15_4	AJUBA	chr14:23440383-23451851	-	protein_coding	1.85696	3.62245	7.97799e-05	0.00554371	2.97945	1.12249	1.12784	2.08722	0.937592	0.765398	6.42927	7.08342	5.99733	8.20757
ENSG00000235162.8_2	C12orf75	chr12:105629068-105789875	+	protein_coding	1.85481	3.61703	0.0282414	0.0897079	3.43188	1.57707	5.03804	2.15744	0.436912	1.89284	3.43616	14.285	19.9263	8.55937
ENSG00000103257.8_2	SLC7A5	chr16:87863629-87903094	-	protein_coding	1.85249	3.61123	0.01869	0.0692365	3.59309	1.7406	9.0062	1.43525	2.19081	0.603898	12.4882	11.5059	12.4918	8.31909
ENSG00000213186.7_3	TRIM59	chr3:160150233-160203561	-	protein_coding	1.85198	3.60995	0.00170103	0.0187213	2.32317	0.471189	0.293495	0.61275	0.311604	0.349691	4.08221	8.62639	2.55445	2.60649
ENSG00000131203.12_3	IDO1	chr8:39759794-39785963	+	protein_coding	1.85142	3.60854	0.033356	0.0992739	2.51735	0.665932	0.645813	0.784605	0.424014	0.515042	0.751338	9.85338	3.29616	12.1575
ENSG00000105699.16_3	LSR	chr19:35739233-35758867	+	protein_coding	1.8512	3.60799	0.0165141	0.0640366	2.61458	0.763388	1.3583	0.182475	0.749244	0.702037	3.40083	11.4836	1.59602	8.86488
ENSG00000251357.4_4	AP000350.4	chr22:24204375-24237410	+	protein_coding	1.84691	3.59728	0.000110884	0.0059213	2.55307	0.706167	0.146758	0.836212	0.634914	1.05788	5.4613	4.84934	3.8505	5.47135
ENSG00000114251.14_3	WNT5A	chr3:55499743-55524567	-	protein_coding	1.845	3.59253	0.000355243	0.00908631	4.25428	2.40928	7.15275	3.92075	2.86603	4.13409	21.2144	20.6096	16.6594	14.6462
ENSG00000180198.15_3	RCC1	chr1:28832455-28865812	+	protein_coding	1.84246	3.58622	0.00131338	0.0164173	3.33758	1.49512	2.80959	1.89032	1.30001	1.49315	11.7458	14.5495	5.87776	6.66167
ENSG00000090776.5_2	EFNB1	chrX:68048840-68061990	+	protein_coding	1.83972	3.57942	0.000522565	0.0104597	4.46704	2.62732	9.44318	4.19563	3.64752	4.77979	20.4205	18.2746	24.3211	21.8853
ENSG00000181019.12_2	NQO1	chr16:69740899-69760854	-	protein_coding	1.83679	3.57214	0.0162279	0.0633793	4.30629	2.4695	5.78653	4.11393	4.1506	4.26403	16.6257	45.6089	23.6621	6.5622
ENSG00000054219.10_3	LY75	chr2:160659866-160761260	-	protein_coding	1.83664	3.57177	0.0163075	0.0635126	2.85844	1.0218	2.2688	1.1903	0.501314	0.581272	2.77839	11.8258	3.28957	12.3075
ENSG00000175984.14_2	DENND2C	chr1:115125469-115213043	-	protein_coding	1.83656	3.57158	8.60564e-05	0.00559742	3.21657	1.38001	1.45295	2.43897	1.29393	1.37137	11.4732	7.72701	7.43867	7.12865
ENSG00000180739.13_3	S1PR5	chr19:10623418-10628607	-	protein_coding	1.83634	3.57103	0.000998072	0.0143613	2.02591	0.189573	0.429625	0.0567421	0	0.119637	3.93748	1.55764	2.45168	5.31054
ENSG00000158055.15_2	GRHL3	chr1:24645812-24690972	+	protein_coding	1.83219	3.56077	0.0443394	0.119189	2.14662	0.314429	0.0563737	1.20915	0.0246323	0	8.2968	0.211575	3.31016	6.9179
ENSG00000260265.1_3	LINC02562	chr4:76006912-76009927	-	lincRNA	1.83071	3.55713	0.00225403	0.0215339	1.87515	0.0444338	0	0.0457817	0	0.0815898	3.18225	4.03792	0.756733	3.89253
ENSG00000162757.4_2	C1orf74	chr1:209952553-209957904	-	protein_coding	1.82892	3.55271	0.00303	0.0247927	2.41989	0.590966	0.521447	0.621816	0.389116	0.501749	1.86295	5.45233	8.85134	3.50618
ENSG00000269972.1_4	AC004542.1	chr22:31373502-31373844	-	lincRNA	1.82755	3.54933	0.00015259	0.00681165	2.62349	0.795945	1.22161	0.916278	0.182263	0.805402	6.16017	4.41101	4.64611	5.59251
ENSG00000239672.7_3	NME1	chr17:49230897-49239789	+	protein_coding	1.82494	3.54291	0.0105223	0.0490797	3.54022	1.71528	1.92817	3.3774	2.35198	1.70579	7.1591	29.9636	6.75991	8.34329
ENSG00000143502.14_3	SUSD4	chr1:223394161-223537544	-	protein_coding	1.82365	3.53975	0.014715	0.0596896	2.29201	0.468359	0.180172	0.616065	0.28487	0.495191	5.83323	0.857073	3.41592	9.26535
ENSG00000047365.11_3	ARAP2	chr4:35949843-36246131	-	protein_coding	1.82358	3.53959	0.00937749	0.0457826	3.56193	1.73835	5.41891	2.1289	1.35073	1.62496	15.1492	4.66222	14.8995	12.3804
ENSG00000079462.7_3	PAFAH1B3	chr19:42801185-42807698	-	protein_coding	1.82283	3.53776	0.00128487	0.0162791	2.89832	1.07549	0.9221	1.41866	1.02966	1.09045	5.88793	10.0279	3.18045	8.73015
ENSG00000111331.12_2	OAS3	chr12:113376157-113411054	+	protein_coding	1.8227	3.53742	0.0163293	0.0635312	4.05344	2.23075	11.755	3.86106	1.76091	1.83547	14.813	10.7599	17.3095	21.3223
ENSG00000154839.9_3	SKA1	chr18:47901365-47920543	+	protein_coding	1.82196	3.53562	0.00607424	0.0358889	1.98817	0.166207	0.338815	0.0946922	0.0817344	0	1.2331	6.39111	1.54776	4.89143
ENSG00000015133.18_2	CCDC88C	chr14:91737667-91884188	-	protein_coding	1.82164	3.53483	0.000532195	0.0105286	3.45177	1.63013	2.63309	2.67207	1.7878	1.46844	11.2492	7.70027	7.22662	15.3487
ENSG00000185480.11_2	PARPBP	chr12:102513963-102591298	+	protein_coding	1.82133	3.53407	0.00231644	0.0218233	2.0358	0.214467	0.208629	0.196076	0.111562	0.12787	2.09224	6.76853	1.51874	3.67252
ENSG00000244693.1_3	CTAGE8	chr7:143963794-143966381	-	protein_coding	1.81929	3.52908	0.000477189	0.0101007	3.1601	1.3408	1.19463	2.73562	0.775748	1.82739	6.31653	7.06046	9.53842	9.27293
ENSG00000019186.9_2	CYP24A1	chr20:52769988-52790512	-	protein_coding	1.8156	3.52006	0.0154549	0.0614469	1.8597	0.0440968	0.027911	0.0469114	0.0501044	0	5.29653	0.397667	1.84157	5.93801
ENSG00000051180.16_2	RAD51	chr15:40986972-41024537	+	protein_coding	1.81537	3.5195	3.12245e-07	0.000873309	1.89639	0.0810208	0	0.179895	0.0323379	0.0277639	2.76719	3.09163	2.59722	2.46421
ENSG00000185033.14_3	SEMA4B	chr15:90703836-90772911	+	protein_coding	1.81507	3.51878	0.00138588	0.0168481	2.88675	1.07168	0.845464	1.38699	1.18049	1.03198	3.70371	9.45227	10.0372	4.51426
ENSG00000143126.7_2	CELSR2	chr1:109792641-109818372	+	protein_coding	1.81366	3.51533	0.00305174	0.0248766	3.13457	1.32091	0.679098	1.99685	1.73283	1.83257	9.12964	3.62278	12.3494	8.5157
ENSG00000112559.13_2	MDFI	chr6:41604620-41621984	+	protein_coding	1.81145	3.50994	0.00969934	0.0466615	2.43274	0.621289	2.75842	0.489708	0	0	4.2004	3.23831	6.66101	4.03259
ENSG00000153294.11_3	ADGRF4	chr6:47653600-47689757	+	protein_coding	1.81102	3.5089	0.0216931	0.0764141	1.87975	0.0687375	0.0499542	0.138288	0	0.012385	4.47466	0.12621	5.93274	3.2911
ENSG00000142949.16_2	PTPRF	chr1:43990858-44089337	+	protein_coding	1.80564	3.49584	0.000471736	0.0100238	4.98786	3.18222	10.3792	7.96548	6.99627	7.32156	27.1571	22.7025	49.7995	28.9048
ENSG00000104147.8_2	OIP5	chr15:41601466-41624819	-	protein_coding	1.80492	3.4941	8.21886e-05	0.00557312	1.95405	0.149131	0.357616	0.113767	0	0	2.75251	4.30837	2.13458	2.60954
ENSG00000125871.13_2	MGME1	chr20:17949556-17971765	+	protein_coding	1.8041	3.4921	0.000174438	0.00708358	3.79852	1.99442	3.28627	3.12557	1.81926	4.05622	11.5131	16.6416	10.8437	13.3377
ENSG00000277161.1_3	PIGW	chr17:34890847-34895159	+	protein_coding	1.80404	3.49196	0.00218823	0.0211806	2.37236	0.568323	0.330831	0.698444	0.566263	0.365496	5.50813	8.06167	2.41564	2.56839
ENSG00000136720.6_2	HS6ST1	chr2:128994290-129076151	-	protein_coding	1.80386	3.49153	0.0046042	0.0306031	4.0959	2.29204	5.55565	5.03441	3.45991	2.26072	22.0736	10.0928	27.3179	10.796
ENSG00000057294.14_3	PKP2	chr12:32943679-33049774	-	protein_coding	1.8036	3.49089	0.0227695	0.0782954	2.28098	0.477388	1.09295	0.39553	0.133288	0.134994	4.57357	2.71956	1.07531	11.9679
ENSG00000101213.6_2	PTK6	chr20:62159354-62168723	-	protein_coding	1.80198	3.48697	0.0181701	0.0680544	2.2683	0.466325	0.622086	1.18493	0	0.0280181	3.55344	5.80007	0.912454	8.09624
ENSG00000187951.10_3	ARHGAP11B	chr15:30916697-31065196	+	protein_coding	1.79972	3.48153	0.000807426	0.012951	2.4111	0.611375	0.582858	0.812705	0.357462	0.398533	2.70782	7.7078	4.83752	3.24614
ENSG00000072310.16_3	SREBF1	chr17:17713713-17740316	-	protein_coding	1.79924	3.48036	0.00189649	0.0196983	3.50446	1.70523	3.90177	1.51955	2.22891	1.83508	13.542	9.0423	6.06857	15.0696
ENSG00000143452.15_3	HORMAD1	chr1:150670536-150693364	-	protein_coding	1.79798	3.47734	0.0459666	0.121832	2.31243	0.514447	1.28606	0.497011	0.0322144	0.178617	8.48371	6.69685	0.252145	5.66034
ENSG00000103067.13_3	ESRP2	chr16:68263014-68272005	-	protein_coding	1.79667	3.47418	0.00259351	0.0231102	1.94187	0.145202	0.0456492	0.408901	0	0.0152531	5.78346	1.11282	2.98694	2.81325
ENSG00000041353.9_3	RAB27B	chr18:52385091-52562747	+	protein_coding	1.79573	3.47191	0.0013483	0.01664	2.96549	1.16976	1.55621	2.25511	1.01873	0.525074	4.20022	6.4735	8.44122	9.14448
ENSG00000205664.10_3	BX890604.1	chrX:3735569-3761898	-	lincRNA	1.79392	3.46756	0.000177286	0.00711813	2.80765	1.01373	1.10153	0.788751	0.522956	1.90324	6.2742	7.22917	5.4535	5.22037
ENSG00000203812.2	HIST2H2AA4	chr1:149822643-149823191	+	protein_coding	1.7924	3.46392	0.00388553	0.0280817	6.76806	4.97565	42.7996	20.6046	28.9709	33.5595	77.8847	203.69	75.2182	113.659
ENSG00000260027.4_3	HOXB7	chr17:46684589-46710934	-	protein_coding	1.79138	3.46146	0.016419	0.063736	3.21587	1.42449	1.69182	3.32348	0.963678	1.27145	7.57457	23.3028	4.31921	5.72318
ENSG00000145506.13_2	NKD2	chr5:1008944-1039058	+	protein_coding	1.7912	3.46101	0.0138409	0.0576061	2.31429	0.523092	0.16127	0.69705	0.709718	0.265649	12.3646	1.9895	2.14775	3.86549
ENSG00000186871.6_4	ERCC6L	chrX:71424507-71458897	-	protein_coding	1.79062	3.45963	0.00219	0.0211806	1.88224	0.091619	0.114939	0.0743417	0.0558911	0.0193131	1.93737	5.75728	1.20272	3.22427
ENSG00000104998.3_2	IL27RA	chr19:14142560-14164028	+	protein_coding	1.79051	3.45938	0.0436319	0.117863	2.80845	1.01794	2.25196	1.16748	0.467495	0.62571	3.86437	2.28108	4.79706	25.0293
ENSG00000156802.12_3	ATAD2	chr8:124332090-124428590	-	protein_coding	1.78985	3.4578	0.000327903	0.00891473	4.66439	2.87453	5.1975	7.218	6.10486	6.99364	21.3961	34.8838	16.5337	28.3451
ENSG00000182010.10_2	RTKN2	chr10:63942794-64028466	-	protein_coding	1.78926	3.45638	0.00753043	0.0403941	1.98083	0.191563	0.109877	0.459849	0.0404942	0.00888714	2.93132	6.6048	0.768621	3.59083
ENSG00000108106.13_2	UBE2S	chr19:55911113-55919145	-	protein_coding	1.78196	3.43892	0.00427609	0.0295174	3.51796	1.736	2.71114	2.73359	2.23495	1.74696	9.99387	22.0861	5.28286	9.79897
ENSG00000161800.12_2	RACGAP1	chr12:50370706-50426919	-	protein_coding	1.78192	3.43882	0.00471334	0.0310088	3.02412	1.2422	1.17017	1.36939	1.38262	1.5561	5.24948	14.2449	3.30101	9.68719
ENSG00000260468.1_2	LINC01290	chr16:10608699-10622059	-	lincRNA	1.77996	3.43416	0.00130372	0.016388	3.85948	2.07952	3.32034	3.63958	3.80023	2.31692	21.0567	8.94618	17.9863	9.6571
ENSG00000114573.9_3	ATP6V1A	chr3:113465866-113530903	+	protein_coding	1.77995	3.43414	0.00111153	0.0151373	4.60594	2.82599	11.9167	5.82769	4.40053	4.30852	23.6552	21.2702	23.0092	25.6744
ENSG00000213281.4_2	NRAS	chr1:115247090-115259515	-	protein_coding	1.77674	3.42651	0.00060982	0.0113024	4.31455	2.53782	7.97839	5.28016	3.04284	3.9886	15.2337	22.8692	19.3454	18.8849
ENSG00000196083.9_3	IL1RAP	chr3:190231840-190377539	+	protein_coding	1.77365	3.41918	0.00854652	0.0434117	2.87397	1.10032	3.60761	0.965256	0.51387	0.541478	5.49577	9.01382	8.66271	3.59494
ENSG00000163781.12_3	TOPBP1	chr3:133317019-133380737	-	protein_coding	1.77197	3.41521	9.33846e-06	0.00271703	4.49148	2.71951	6.6534	5.87591	4.34903	5.68579	20.3413	22.5891	19.2452	24.1204
ENSG00000017260.19_4	ATP2C1	chr3:130569439-130735556	+	protein_coding	1.77146	3.41398	0.000216904	0.00763727	4.65973	2.88827	6.68205	6.93272	6.75464	5.35863	16.7705	31.0608	21.181	31.3008
ENSG00000277443.2_3	MARCKS	chr6:114178541-114184648	+	protein_coding	1.77141	3.41389	0.033223	0.0989963	5.83559	4.06418	60.2004	13.2464	8.94422	8.03077	61.1531	60.226	55.0719	48.8433
ENSG00000115415.18_4	STAT1	chr2:191829084-191885686	-	protein_coding	1.76977	3.41001	0.0298148	0.0928685	6.67175	4.90197	44.3353	27.7136	22.2496	25.4012	55.5134	44.2159	198.573	210.855
ENSG00000101888.11_2	NXT2	chrX:108779010-108787919	+	protein_coding	1.76939	3.4091	0.0230797	0.0789735	2.39963	0.630235	1.26246	0.546204	0.224164	0.340266	2.41018	3.41577	2.17037	15.2384
ENSG00000101084.17_3	C20orf24	chr20:35234137-35240960	+	protein_coding	1.76918	3.40859	0.00351615	0.0267326	4.40569	2.63651	8.81985	5.86734	3.87529	3.54763	16.5391	28.2603	12.3653	28.4247
ENSG00000277534.1_4	AC007996.1	chr18:24122935-24125755	-	sense_intronic	1.76888	3.40789	2.30345e-05	0.00376201	2.47038	0.701506	0.825414	0.762894	0.240739	0.751578	5.18081	4.73948	3.8264	4.50931
ENSG00000129810.14_4	SGO1	chr3:20202085-20227784	-	protein_coding	1.76881	3.40772	0.00111088	0.0151373	1.9007	0.131895	0.141464	0.209335	0	0.0442588	1.9797	4.78734	1.3723	3.75173
ENSG00000001617.11_2	SEMA3F	chr3:50192478-50226508	+	protein_coding	1.76769	3.40509	0.000418209	0.00970688	2.71684	0.949145	1.07749	1.59962	0.510681	0.703195	6.14158	4.97103	3.90332	7.93436
ENSG00000057657.15_3	PRDM1	chr6:106534195-106557814	+	protein_coding	1.76658	3.40246	0.0110476	0.0503133	3.56913	1.80255	4.03718	3.70302	1.57087	1.43131	9.85967	5.76987	9.57716	24.5206
ENSG00000274173.1_3	AL035661.1	chr20:24912476-24913619	+	lincRNA	1.76657	3.40245	0.00332576	0.0260348	2.05374	0.287163	0.915538	0.077994	0	0.073673	3.53287	5.86743	1.45923	2.88133
ENSG00000073150.13_3	PANX2	chr22:50609160-50618723	+	protein_coding	1.76243	3.39269	0.00392139	0.0281854	2.18321	0.420775	0.913976	0.359612	0.126693	0.0952341	1.38664	5.93808	4.95632	3.31359
ENSG00000168040.4_2	FADD	chr11:70049269-70053496	+	protein_coding	1.76232	3.39242	0.0129747	0.0554448	5.27537	3.51306	8.06653	13.6033	9.12233	11.6756	15.2109	32.5718	55.0587	72.7493
ENSG00000160211.15_2	G6PD	chrX:153759606-153775787	-	protein_coding	1.76	3.38698	0.0103944	0.048757	3.63576	1.87576	6.51646	2.24587	1.90318	1.56109	10.3808	22.6693	9.68251	7.29581
ENSG00000169258.6_2	GPRIN1	chr5:176022803-176037134	-	protein_coding	1.75908	3.38482	0.000320598	0.00882335	2.02873	0.269651	0.20905	0.390978	0.164855	0.078092	1.57603	4.11075	3.81872	3.36985
ENSG00000247626.4_3	MARS2	chr2:198570093-198573111	+	protein_coding	1.75759	3.38132	0.000856889	0.013169	2.57828	0.820695	0.986981	0.945955	0.442687	0.744682	7.76557	4.32169	6.23243	2.77091
ENSG00000259522.3_4	AL136295.4	chr14:24649601-24659622	-	protein_coding	1.75538	3.37616	0.0141571	0.0584054	1.76706	0.0116811	0.026971	0.005441	0.000347	0	4.57995	4.29663	2.7527	0.209997
ENSG00000059588.9_2	TARBP1	chr1:234527059-234614849	-	protein_coding	1.75487	3.37496	1.74271e-05	0.0033045	3.71742	1.96255	2.86088	3.34278	2.80511	2.61675	10.9624	14.6754	9.68859	13.9368
ENSG00000111726.12_2	CMAS	chr12:22199108-22218608	+	protein_coding	1.75463	3.3744	0.00895752	0.0446181	4.85016	3.09553	7.57313	8.71434	6.56831	7.46906	15.994	57.3579	15.8406	40.4403
ENSG00000160932.10_4	LY6E	chr8:144099399-144105249	+	protein_coding	1.75396	3.37283	0.0226931	0.0781526	3.9599	2.20594	10.2185	3.35401	2.25148	1.85307	26.2643	12.8508	7.24377	17.8365
ENSG00000121578.12_3	B4GALT4	chr3:118930579-118959950	-	protein_coding	1.75291	3.37037	0.00670157	0.0378369	3.27332	1.52041	1.62781	2.05211	1.80661	2.0087	22.4181	6.47636	6.77819	5.4172
ENSG00000262202.4_3	AC007952.4	chr17:19015313-19015949	-	lincRNA	1.75269	3.36986	0.0251843	0.083715	5.2926	3.53992	25.2719	8.16854	6.44205	9.20935	24.891	82.6898	46.783	21.7948
ENSG00000272410.5_4	AC022384.1	chr3:10291056-10327480	+	protein_coding	1.75255	3.36953	0.0133061	0.0562697	1.91325	0.160706	0.0022319	0.125091	0.251269	0.106631	5.20394	1.05017	6.54969	1.09605
ENSG00000259692.5_3	AC104041.1	chr15:81952823-82163466	-	lincRNA	1.74958	3.36261	0.0341033	0.100788	1.82872	0.0791331	0	0.17159	0.0629431	0	2.83502	4.74608	0	6.22529
ENSG00000035499.12_2	DEPDC1B	chr5:59892739-59996017	-	protein_coding	1.74908	3.36143	0.00709465	0.0390127	1.96035	0.211274	0.234248	0.207179	0.0735045	0.123109	1.62088	6.38612	1.09691	4.65006
ENSG00000148110.15_3	MFSD14B	chr9:97136833-97223324	+	protein_coding	1.7456	3.35334	0.00357085	0.0269836	4.06606	2.32047	9.8513	2.70598	2.90674	2.96204	17.4933	15.4734	15.2701	14.8796
ENSG00000127080.9_2	IPPK	chr9:95375466-95432547	-	protein_coding	1.74548	3.35306	0.00456895	0.0304663	3.30368	1.5582	2.4463	2.12805	2.15143	1.21375	10.3311	4.41977	17.4131	7.40712
ENSG00000085999.11_3	RAD54L	chr1:46713360-46744145	+	protein_coding	1.74491	3.35174	0.000259899	0.00814903	1.80936	0.0644486	0.0357217	0.123525	0.0274914	0	1.74815	3.95042	1.63841	3.20395
ENSG00000279535.1_3	AP003476.1	chr8:119201694-119202209	-	TEC	1.74467	3.35119	0.0313004	0.0954932	1.81226	0.0675874	0	0	0.048048	0.150806	7.56128	3.01791	0.078238	3.10136
ENSG00000230815.1_4	AL807757.1	chr9:97586554-97587055	+	sense_intronic	1.74342	3.34827	0.0169002	0.0649617	2.1127	0.369279	0.468004	0.094732	0.528989	0.132966	2.20636	1.83091	11.6478	2.04781
ENSG00000145103.12_2	ILDR1	chr3:121706170-121741051	-	protein_coding	1.74122	3.34319	0.0140078	0.0580093	1.78555	0.0443242	0	0.0943823	0.0332434	0	5.21647	2.90113	0.250322	3.65864
ENSG00000121900.18_2	TMEM54	chr1:33360195-33367039	-	protein_coding	1.73883	3.33764	0.000185381	0.0072025	3.24319	1.50436	1.57479	2.22322	1.80099	1.78668	7.4216	13.3329	6.67832	7.67353
ENSG00000176092.14_3	CRYBG2	chr1:26648350-26686543	-	protein_coding	1.73868	3.33729	0.00533347	0.0332044	2.16259	0.423911	0.242344	1.32162	0.0619579	0.0575464	3.21413	1.67356	3.73361	6.53403
ENSG00000177674.15_4	AGTRAP	chr1:11796141-11814859	+	protein_coding	1.73798	3.33567	0.00456671	0.0304663	2.79554	1.05756	2.56374	1.06664	0.414881	0.801107	4.95924	10.4949	6.29127	3.65227
ENSG00000177602.5_3	HASPIN	chr17:3627197-3629993	+	protein_coding	1.73747	3.3345	0.00549074	0.0338621	1.8927	0.155226	0.204555	0.158036	0.070314	0.030031	1.30207	6.68551	1.45362	3.3796
ENSG00000132530.16_3	XAF1	chr17:6658766-6678966	+	protein_coding	1.73643	3.3321	0.0346273	0.101771	4.9104	3.17397	21.8923	7.35419	4.06431	5.85055	34.1455	11.4435	42.2427	42.2499
ENSG00000166851.14_3	PLK1	chr16:23688977-23701688	+	protein_coding	1.7361	3.33133	6.42163e-05	0.00515164	2.03191	0.295813	0.253851	0.405221	0.120183	0.150574	2.45013	4.1107	2.30803	3.7949
ENSG00000142675.17_2	CNKSR1	chr1:26503894-26516377	+	protein_coding	1.73585	3.33075	2.53843e-06	0.00208414	1.92352	0.187673	0.155631	0.249733	0.0897473	0.0691005	2.26687	2.72654	2.87431	3.39051
ENSG00000198561.13_3	CTNND1	chr11:57520715-57587018	+	protein_coding	1.73396	3.32639	4.38007e-05	0.00482779	5.36649	3.63253	10.1698	12.9347	12.2129	10.5043	54.3871	38.8715	34.3588	36.0961
ENSG00000166224.16_3	SGPL1	chr10:72575717-72640930	+	protein_coding	1.73287	3.32388	7.83754e-05	0.00553202	3.91557	2.1827	4.20996	4.05126	2.94903	3.08799	17.3599	10.2295	14.5013	15.2261
ENSG00000183684.7_2	ALYREF	chr17:79845720-79849462	-	protein_coding	1.73285	3.32384	0.00261561	0.0232471	4.68398	2.95113	8.55846	6.89661	5.58531	6.19632	24.9942	47.5345	15.7865	19.6151
ENSG00000115758.12_3	ODC1	chr2:10580094-10588630	-	protein_coding	1.73075	3.31901	0.000732553	0.0122802	5.7251	3.99435	8.79466	18.0621	17.2649	17.919	64.6059	58.1276	45.7221	42.197
ENSG00000142731.10_2	PLK4	chr4:128802016-128820350	+	protein_coding	1.73021	3.31777	0.00101113	0.0144287	2.2823	0.552089	0.3795	0.924132	0.311763	0.327301	3.83389	5.0065	1.93859	5.5631
ENSG00000221926.11_4	TRIM16	chr17:15531274-15587625	-	protein_coding	1.72947	3.31606	0.010756	0.0496612	2.75476	1.02529	0.556168	2.28939	0.794838	0.868003	3.28248	13.2345	6.77796	3.37686
ENSG00000148248.13_2	SURF4	chr9:136228325-136243037	-	protein_coding	1.72872	3.31434	0.016099	0.0630687	4.72227	2.99355	16.3314	9.72189	2.33805	5.48633	25.9663	31.7197	23.1925	21.7442
ENSG00000158710.14_2	TAGLN2	chr1:159887897-159895522	-	protein_coding	1.72788	3.3124	0.0112269	0.0508299	6.11881	4.39093	44.886	16.728	14.7862	14.0866	42.8106	115.901	63.1683	69.9685
ENSG00000175315.2_2	CST6	chr11:65779312-65780976	+	protein_coding	1.72507	3.30595	0.0497601	0.127975	2.42998	0.704911	0.809988	1.6757	0.457755	0	1.22162	2.0898	6.98687	14.3818
ENSG00000164465.18_2	DCBLD1	chr6:117774980-117891021	+	protein_coding	1.72452	3.30471	0.00207062	0.0205637	3.17637	1.45185	2.06493	1.94382	1.55189	1.43222	5.74522	10.2426	14.2233	4.7857
ENSG00000164924.17_4	YWHAZ	chr8:101928753-101965616	-	protein_coding	1.72368	3.30277	5.87243e-05	0.00509286	6.34659	4.62292	27.8999	20.6219	23.911	22.6791	66.8548	107.529	80.6533	71.9387
ENSG00000163918.10_3	RFC4	chr3:186507669-186524847	-	protein_coding	1.72198	3.29889	0.00454348	0.0303917	3.09653	1.37455	1.25296	1.92871	1.70144	1.5357	4.53155	13.8699	4.33618	11.1957
ENSG00000196866.2_3	HIST1H2AD	chr6:26199079-26199471	-	protein_coding	1.72172	3.2983	0.0260722	0.085525	4.64465	2.92293	8.53947	5.74934	3.3585	10.7879	9.97337	23.2796	23.9264	57.9494
ENSG00000266538.1_4	AC005838.2	chr17:15434087-15434403	-	lincRNA	1.72149	3.29776	0.0397927	0.111315	3.28534	1.56385	3.62684	2.58493	0.282194	2.59206	9.10757	3.51902	6.91236	24.0002
ENSG00000127824.13_3	TUBA4A	chr2:220114433-220142892	-	protein_coding	1.72102	3.2967	0.0061447	0.0360706	2.99607	1.27505	0.892595	2.82794	1.88449	0.641414	3.31338	8.59134	10.4748	7.53463
ENSG00000225950.8_3	NTF4	chr19:49564323-49568311	-	protein_coding	1.71811	3.29006	0.000696028	0.0120414	1.76139	0.0432776	0	0.127487	0	0	4.56883	1.29169	2.31863	2.11924
ENSG00000105011.8_2	ASF1B	chr19:14230321-14247768	-	protein_coding	1.71719	3.28794	0.0016724	0.018614	1.92051	0.20332	0.19718	0.239611	0.103346	0.0731615	1.51297	5.3898	1.79348	3.57824
ENSG00000167799.9_3	NUDT8	chr11:67395409-67397401	-	protein_coding	1.7171	3.28774	0.00223339	0.0214687	2.76731	1.05021	1.74441	1.32694	0.697337	0.696591	4.29512	11.2821	4.28403	5.25255
ENSG00000204775.4	KM-PA-2	chr8:145317003-145331153	-	protein_coding	1.71574	3.28465	0.000599634	0.0112411	2.31538	0.599645	0.640093	0	0.518159	1.11767	4.94555	4.25258	4.12223	2.83685
ENSG00000159228.12_2	CBR1	chr21:37442239-37445464	+	protein_coding	1.71566	3.28447	0.0139867	0.0579865	4.9823	3.26664	12.5328	3.59338	7.64181	14.9697	50.9291	26.6005	34.6856	18.5193
ENSG00000268885.1	AC026740.1	chr5:667759-668839	+	protein_coding	1.71359	3.27977	0.00466654	0.0308006	3.18093	1.46733	1.66462	2.7208	1.16713	1.72074	13.8025	12.0015	4.74353	5.11939
ENSG00000100092.20_3	SH3BP1	chr22:38030661-38062939	+	protein_coding	1.71097	3.27382	0.000649712	0.0116503	2.40145	0.690478	1.68643	0.588901	0.284242	0.237369	4.58178	4.08725	3.78292	4.73703
ENSG00000161547.16_3	SRSF2	chr17:74730197-74733456	-	protein_coding	1.70815	3.26742	0.000513751	0.010398	4.04924	2.34109	5.84593	3.37705	3.30739	4.10654	19.9808	19.5575	10.8129	13.7443
ENSG00000178966.16_3	RMI1	chr9:86595626-86618989	+	protein_coding	1.70769	3.26636	0.000351583	0.00908391	3.14649	1.43881	2.1039	1.08388	1.43919	2.42348	7.48026	11.5135	6.56899	6.65468
ENSG00000173418.11_2	NAA20	chr20:19997760-20014299	+	protein_coding	1.70682	3.2644	3.08873e-05	0.00418747	4.67596	2.96915	6.03975	8.83216	5.38839	7.50374	24.4861	26.1604	26.3187	21.58
ENSG00000177917.10_2	ARL6IP6	chr2:153574407-153617767	+	protein_coding	1.70514	3.26062	0.00247796	0.0226211	2.69169	0.986548	2.04082	0.801342	0.581354	0.779532	5.18468	9.94782	3.575	4.62452
ENSG00000132623.15_3	ANKEF1	chr20:9966774-10038951	+	protein_coding	1.70374	3.25744	0.00742886	0.0400918	2.37278	0.669044	0.788919	0.704589	0.488394	0.408253	3.35785	11.1358	2.1872	3.26937
ENSG00000166415.14_2	WDR72	chr15:53805938-54055075	-	protein_coding	1.70305	3.25588	0.0263053	0.0859871	1.78735	0.0843039	0.0118026	0.182339	0.0458468	0.0097323	5.85922	4.34779	0.119113	2.4583
ENSG00000198088.10_4	NUP62CL	chrX:106366657-106449663	-	protein_coding	1.70273	3.25517	0.000638788	0.0116051	2.11053	0.407796	0.184992	0.531863	0.265683	0.348265	2.87328	6.16295	2.85777	2.24956
ENSG00000119411.10_2	BSPRY	chr9:116111821-116133513	+	protein_coding	1.70256	3.25478	0.00826096	0.0426781	2.33965	0.637094	0.160272	1.88321	0.276741	0.369618	3.05515	3.4238	2.73941	8.7863
ENSG00000186973.10_2	FAM183A	chr1:43610824-43622067	+	protein_coding	1.7015	3.25238	8.49533e-05	0.00559742	1.74439	0.042894	0.0675938	0.0549782	0	0	2.73785	1.77932	3.52706	1.67966
ENSG00000169299.13_2	PGM2	chr4:37828255-37864558	+	protein_coding	1.70149	3.25236	4.52612e-05	0.00488357	3.80015	2.09866	4.17336	3.35637	2.58822	3.16159	14.724	10.7088	11.4428	15.4376
ENSG00000272949.1_4	AC093668.2	chr7:102123791-102184211	-	processed_transcript	1.70099	3.25124	0.0106346	0.049328	1.91946	0.218467	0.025058	0.26489	0.036153	0.364066	5.48879	0.945102	5.4556	1.51312
ENSG00000163599.14_2	CTLA4	chr2:204732509-204738683	+	protein_coding	1.69842	3.24546	0.00961821	0.0464516	2.13081	0.432386	0.181852	0.812301	0.0667051	0.451465	1.68319	2.24807	3.19443	9.06473
ENSG00000139514.12_3	SLC7A1	chr13:30083547-30169825	-	protein_coding	1.69741	3.24319	0.00123125	0.0159336	3.12342	1.42601	1.38484	2.08911	2.035	1.3315	5.87904	12.9424	4.98588	9.04574
ENSG00000163545.8_2	NUAK2	chr1:205271187-205290919	-	protein_coding	1.69702	3.24231	0.00131206	0.0164173	2.67596	0.978934	1.82775	1.24734	0.517408	0.565095	5.37473	3.57138	5.18782	8.24967
ENSG00000162738.5_2	VANGL2	chr1:160370376-160398468	+	protein_coding	1.69664	3.24145	2.01151e-05	0.00352279	2.64412	0.947482	0.646703	0.815443	1.07369	1.23121	4.61731	4.91272	4.97484	6.69479
ENSG00000167553.15_3	TUBA1C	chr12:49582519-49668386	+	protein_coding	1.69087	3.22851	0.0029941	0.0247024	4.31006	2.61919	4.97198	6.32447	4.77614	4.64009	14.705	12.5791	17.4571	38.3327
ENSG00000091127.13_2	PUS7	chr7:105080108-105162714	-	protein_coding	1.68969	3.22586	0.00171732	0.0188025	4.26059	2.57091	4.4282	5.71615	5.31151	4.41717	21.9024	24.7225	21.3895	9.23357
ENSG00000010292.12_3	NCAPD2	chr12:6602522-6641121	+	protein_coding	1.68898	3.22429	0.00182101	0.0192922	4.31128	2.6223	3.82959	7.41927	4.19707	5.80175	12.3572	25.0145	15.0669	26.8251
ENSG00000139921.12_2	TMX1	chr14:51706880-51724264	+	protein_coding	1.68782	3.22169	0.000216472	0.00763727	4.3547	2.66688	7.46052	5.13926	4.02298	5.23405	19.2994	26.3199	17.0289	16.5246
ENSG00000275342.4_2	PRAG1	chr8:8175258-8244008	-	protein_coding	1.68734	3.22062	0.0020079	0.020283	2.43285	0.74551	0.82747	1.07863	0.474021	0.411082	4.67727	2.58796	8.34352	3.46626
ENSG00000117984.13_3	CTSD	chr11:1773982-1785803	-	protein_coding	1.6864	3.21853	0.00228615	0.0216932	4.81174	3.12534	15.261	6.7583	6.26762	5.3238	34.2363	24.7462	28.6291	22.1469
ENSG00000120549.17_4	KIAA1217	chr10:23983675-24836777	+	protein_coding	1.68536	3.2162	0.00245632	0.0225099	4.36745	2.68209	4.94188	5.49542	5.36906	5.90166	34.7869	12.8726	13.266	24.6301
ENSG00000167306.19_3	MYO5B	chr18:47349183-47721463	-	protein_coding	1.68347	3.21199	0.00259209	0.0231102	2.9027	1.21923	1.36478	2.61833	0.907187	0.800556	3.9514	7.10688	5.79859	10.4602
ENSG00000184979.9_2	USP18	chr22:18632666-18660164	+	protein_coding	1.68309	3.21114	0.00833617	0.0428794	3.62086	1.93777	5.8112	2.66113	1.97105	1.90779	10.389	7.86158	8.50061	22.8892
ENSG00000109586.11_2	GALNT7	chr4:174089904-174245118	+	protein_coding	1.68261	3.21009	0.00457467	0.0304819	3.19626	1.51365	2.10775	2.39543	1.51106	1.50851	6.99613	18.3292	6.30155	5.25424
ENSG00000188229.5_2	TUBB4B	chr9:140135665-140138159	+	protein_coding	1.68242	3.20966	0.00119173	0.0156133	6.516	4.83357	24.2303	32.9979	25.7429	27.8152	65.5296	152.071	97.1276	69.2008
ENSG00000178295.14_3	GEN1	chr2:17935125-17970208	+	protein_coding	1.68182	3.20833	0.000171723	0.00705251	2.15993	0.47811	0.484874	0.514743	0.313688	0.274035	2.61052	2.77524	3.48459	5.52506
ENSG00000165704.14_2	HPRT1	chrX:133594183-133654543	+	protein_coding	1.68015	3.20462	0.00444659	0.0301492	4.71283	3.03268	8.09839	7.56915	5.65942	7.6371	19.5851	49.7569	14.6289	27.9625
ENSG00000115159.15_2	GPD2	chr2:157291802-157470247	+	protein_coding	1.67991	3.20409	0.00718106	0.0392564	3.73004	2.05013	5.80242	3.39677	2.0982	2.17464	6.9842	22.5724	10.4617	13.3726
ENSG00000162063.12_3	CCNF	chr16:2479395-2508855	+	protein_coding	1.67587	3.19511	0.000360524	0.00911052	1.8672	0.191336	0.207584	0.241724	0.0390853	0.090932	1.54745	3.03205	2.25812	4.29342
ENSG00000172531.14_2	PPP1CA	chr11:67165654-67188654	-	protein_coding	1.67386	3.19067	0.00216477	0.0210826	3.99763	2.32377	7.38087	4.66295	2.51048	2.77054	15.8779	17.2063	10.7704	17.0011
ENSG00000049283.17_3	EPN3	chr17:48609904-48621111	+	protein_coding	1.67322	3.18925	0.000108482	0.0059213	1.81712	0.143906	0.120999	0.27894	0.0211469	0.0179722	3.2795	3.34932	1.77079	1.9896
ENSG00000141934.9_3	PLPP2	chr19:281040-291504	-	protein_coding	1.67253	3.18774	0.00115042	0.0153639	1.80319	0.130651	0.115704	0.112646	0.0954953	0.0563369	2.74654	4.76812	1.21812	2.09458
ENSG00000100297.15_3	MCM5	chr22:35796056-35821423	+	protein_coding	1.67135	3.18512	0.000966705	0.014128	3.19076	1.51942	2.19952	2.1384	1.35357	1.85784	5.8953	11.6841	5.49539	11.2362
ENSG00000134996.11_2	OSTF1	chr9:77703459-77762181	+	protein_coding	1.67005	3.18226	0.0116873	0.0521754	5.37231	3.70226	30.0631	12.4221	6.15798	8.61852	45.1773	34.1	44.6412	38.7936
ENSG00000051596.9_3	THOC3	chr5:175344876-175461683	-	protein_coding	1.66721	3.17599	2.54269e-07	0.000873309	4.04239	2.37518	4.46882	4.66874	4.02168	3.65347	16.0205	15.2734	15.4834	15.1446
ENSG00000146918.19_2	NCAPG2	chr7:158424003-158497520	-	protein_coding	1.6672	3.17599	8.96611e-06	0.00271703	3.26288	1.59567	2.4689	2.17264	1.62932	1.88354	7.37836	8.33184	8.7713	10.1127
ENSG00000142677.3_2	IL22RA1	chr1:24446261-24469611	-	protein_coding	1.6671	3.17576	2.76106e-05	0.0040436	1.75379	0.0866894	0.040176	0.151426	0.030851	0.03002	2.80135	1.71492	3.13938	2.02792
ENSG00000110723.11_4	EXPH5	chr11:108376158-108464465	-	protein_coding	1.66628	3.17395	0.0169949	0.0651913	2.50721	0.840931	1.03097	1.2298	0.539066	0.476909	7.40393	7.81471	1.09401	5.73458
ENSG00000180071.19_3	ANKRD18A	chr9:38571355-38620657	-	protein_coding	1.6645	3.17004	0.00656318	0.0373845	2.22252	0.558017	0.781415	0.882353	0.133265	0.236294	2.56628	7.90039	1.80091	4.33649
ENSG00000142669.14_3	SH3BGRL3	chr1:26605667-26608013	+	protein_coding	1.66408	3.16912	0.0481084	0.125516	3.85904	2.19496	16.1538	2.72828	1.2141	2.10406	12.8825	10.6234	13.0791	18.5151
ENSG00000105880.4_2	DLX5	chr7:96649704-96654409	-	protein_coding	1.66394	3.1688	0.0224862	0.0777513	1.99239	0.328456	0.0597303	0.740708	0.259722	0.0698048	4.37356	1.72381	8.31572	0.838329
ENSG00000152332.15_2	UHMK1	chr1:162467041-162499419	+	protein_coding	1.66389	3.16869	0.000622151	0.0114572	3.52973	1.86585	3.99196	2.34115	2.23321	2.27265	16.3484	10.2408	8.09091	9.0359
ENSG00000180758.11_3	GPR157	chr1:9160364-9189229	-	protein_coding	1.66333	3.16746	0.00147823	0.0174602	2.63926	0.975939	1.43809	1.2138	0.485658	0.866551	4.06101	3.44132	8.92027	5.75644
ENSG00000255983.1_3	AC007848.1	chr12:5497755-5515817	+	lincRNA	1.66312	3.16702	1.09244e-05	0.00277535	1.7442	0.081077	0	0.096717	0.141647	0	2.29566	2.69782	1.69358	2.83715
ENSG00000086300.15_2	SNX10	chr7:26331515-26413949	+	protein_coding	1.66262	3.16592	0.0461335	0.1221	3.71959	2.05696	12.5767	3.09557	1.33362	1.31041	6.40972	14.5453	13.8169	16.6469
ENSG00000105486.13_3	LIG1	chr19:48618702-48673860	-	protein_coding	1.66201	3.16457	0.000467165	0.0100238	3.155	1.49299	2.19135	1.87448	1.2718	2.01188	8.79943	6.83058	5.38706	11.8441
ENSG00000159216.18_3	RUNX1	chr21:36160098-37376965	-	protein_coding	1.65952	3.15911	0.0125735	0.0543945	2.82168	1.16216	3.25462	1.35642	0.844969	0.356041	8.81563	4.66968	9.58496	3.24101
ENSG00000070731.10_3	ST6GALNAC2	chr17:74561461-74583038	-	protein_coding	1.65926	3.15855	0.00203591	0.020391	2.33959	0.680333	1.97616	0.320903	0.166256	0.438407	4.25555	5.04615	3.52889	3.56104
ENSG00000116830.11_2	TTF2	chr1:117602925-117650075	+	protein_coding	1.6562	3.15186	6.89655e-06	0.00271703	2.9737	1.3175	1.64796	1.85352	1.28326	1.23657	6.24622	6.71297	6.42107	8.18114
ENSG00000143942.4_2	CHAC2	chr2:53994929-54002333	+	protein_coding	1.65585	3.15109	0.0435889	0.117818	2.28174	0.625887	0.896742	0.531996	0.484172	0.3149	3.26745	14.4099	0.773935	3.79269
ENSG00000043355.11_3	ZIC2	chr13:100634026-100639027	+	protein_coding	1.65546	3.15023	0.0064352	0.0369768	1.69012	0.0346599	0	0.0280042	0.0446387	0.0251176	3.96531	2.74703	0.41714	3.11203
ENSG00000213214.4_2	ARHGEF35	chr7:143883176-143892748	-	protein_coding	1.65506	3.14936	0.00455375	0.0304332	4.98234	3.32727	5.79824	14.3967	8.08255	9.67593	30.7045	19.3678	51.9669	28.1918
ENSG00000251381.7_2	LINC00958	chr11:12983389-13011095	-	lincRNA	1.65365	3.14629	0.0135062	0.0567834	1.75273	0.0990797	0.0395732	0.223896	0.0344378	0	3.08238	0.460995	2.05783	6.07172
ENSG00000119866.20_2	BCL11A	chr2:60678302-60780702	-	protein_coding	1.65241	3.14359	0.00403683	0.0286036	2.61404	0.961633	0.490657	0.545543	1.64549	1.36024	6.53491	2.73354	4.20269	8.59835
ENSG00000165480.15_2	SKA3	chr13:21727734-21750741	-	protein_coding	1.65124	3.14103	0.0119589	0.0530072	2.0859	0.434664	0.95712	0.174813	0.11201	0.305246	1.88442	8.47953	1.58763	3.59122
ENSG00000279662.1_3	AC131649.2	chr16:10539166-10543604	-	TEC	1.65107	3.14067	0.000799266	0.0128994	2.2366	0.585524	1.07321	0.556416	0.294283	0.214068	4.7945	2.48467	5.15037	2.97238
ENSG00000215784.5_2	FAM72D	chr1:143896448-143913143	-	protein_coding	1.65016	3.13868	0.00327087	0.0257546	1.96493	0.314776	0.486777	0.245155	0.123407	0.150858	2.73977	6.52757	1.51006	2.28725
ENSG00000130545.15_3	CRB3	chr19:6463788-6467232	+	protein_coding	1.64887	3.13587	0.00479384	0.0313449	1.90898	0.260113	0	0.417414	0.111912	0.305087	2.87572	5.62601	0.954928	2.96191
ENSG00000136122.15_2	BORA	chr13:73301887-73330336	+	protein_coding	1.64776	3.13346	0.00396014	0.028326	2.12659	0.478831	0.513094	0.676852	0.0920094	0.361391	1.69076	7.12955	2.60362	3.61302
ENSG00000187554.11_2	TLR5	chr1:223282748-223316624	-	protein_coding	1.64731	3.13249	0.002867	0.0242713	1.94573	0.298419	0.462522	0.24912	0.0860144	0.152896	1.84681	4.43825	1.40441	4.91652
ENSG00000070882.12_3	OSBPL3	chr7:24836158-25021253	-	protein_coding	1.64714	3.13211	7.12909e-06	0.00271703	3.22852	1.58138	1.8611	2.3487	1.97288	1.81569	10.424	7.99658	7.27518	8.07501
ENSG00000006634.7_2	DBF4	chr7:87505531-87538856	+	protein_coding	1.64667	3.1311	0.000256549	0.00814223	2.58567	0.938997	0.839948	1.04935	0.813283	0.975957	4.81526	7.62597	3.22924	5.12086
ENSG00000278259.4_2	MYO19	chr17:34851477-34899284	-	protein_coding	1.64581	3.12923	0.000135558	0.00646592	2.45722	0.811409	0.844637	0.987184	0.592311	0.625014	4.06679	6.8666	3.96819	3.59268
ENSG00000123473.15_2	STIL	chr1:47715811-47779819	-	protein_coding	1.64528	3.12809	0.000520148	0.0104567	1.99167	0.346391	0.551609	0.316288	0.160328	0.10251	2.08151	4.77514	2.13978	3.47702
ENSG00000088836.12_3	SLC4A11	chr20:3208063-3219836	-	protein_coding	1.64386	3.125	0.00425985	0.0294543	1.79763	0.15377	0.0891888	0.253965	0.0491859	0.0688505	6.39243	1.7915	1.59601	1.72664
ENSG00000262814.7_3	MRPL12	chr17:79670387-79674556	+	protein_coding	1.64317	3.12352	0.0122688	0.0538304	4.94121	3.29804	7.19924	10.1665	9.03532	9.18613	36.5756	66.7703	15.3948	20.338
ENSG00000170017.12_3	ALCAM	chr3:105085753-105295744	+	protein_coding	1.64291	3.12295	0.000987305	0.0142866	4.45657	2.81366	6.28692	8.02644	3.53168	7.19715	26.3704	20.8668	15.0545	23.187
ENSG00000165591.6_2	FAAH2	chrX:57313139-57515629	+	protein_coding	1.6406	3.11795	0.0109871	0.0501603	2.30646	0.665867	0.167545	0.876984	0.594824	0.812746	2.87393	4.00158	1.78895	10.0805
ENSG00000113430.9_2	IRX4	chr5:1877527-1887350	-	protein_coding	1.63697	3.11011	0.0167153	0.0645614	1.64768	0.0107112	0	0	0	0.0301431	2.69463	0.143805	3.20026	4.43001
ENSG00000020633.18_2	RUNX3	chr1:25226002-25291612	-	protein_coding	1.63674	3.10961	0.010974	0.0501325	2.33116	0.69442	1.15741	0.630046	0.517583	0.284929	1.18749	5.45779	4.35212	7.48076
ENSG00000261618.1_3	AC083837.1	chr8:79749764-79752757	+	lincRNA	1.63637	3.10882	0.00350652	0.0267288	2.33003	0.693659	0.323154	0.474505	1.87215	0.221195	3.93042	3.95279	2.57888	6.31391
ENSG00000154640.14_3	BTG3	chr21:18965971-18985265	-	protein_coding	1.63577	3.10754	0.000478245	0.0101007	3.56765	1.93188	3.76759	2.25971	3.26142	2.20023	8.2855	14.6206	8.61184	13.1766
ENSG00000187017.15_3	ESPN	chr1:6484848-6521430	+	protein_coding	1.63412	3.10398	0.000194673	0.00737024	2.03854	0.404424	0.536543	0.321093	0.330516	0.136259	3.79027	2.80683	4.23888	1.98187
ENSG00000149256.15_3	TENM4	chr11:78363876-79151992	-	protein_coding	1.63386	3.10342	0.000821399	0.0130254	2.44805	0.814194	0.797128	1.11358	0.666916	0.509651	7.41645	4.28318	4.40237	2.69096
ENSG00000042753.11_2	AP2S1	chr19:47341393-47354249	-	protein_coding	1.63358	3.10282	0.000283309	0.00834897	3.43569	1.80211	3.95751	1.80294	2.04532	2.49502	8.95022	10.378	8.11351	12.2863
ENSG00000197275.13_3	RAD54B	chr8:95384188-95487337	-	protein_coding	1.63271	3.10096	0.00695403	0.0385712	2.49039	0.857672	1.04579	0.985428	0.735794	0.529422	5.05259	9.34022	1.73524	4.82448
ENSG00000111199.10_2	TRPV4	chr12:110220890-110271206	-	protein_coding	1.63269	3.1009	0.000125745	0.00622349	1.77523	0.142548	0.244808	0.141708	0	0.044691	2.50157	2.56414	1.4787	3.43765
ENSG00000227640.2_2	SOX21-AS1	chr13:95364970-95368500	+	lincRNA	1.63218	3.09981	7.95033e-05	0.0055417	1.7181	0.0859242	0	0.269004	0	0	3.13531	1.69557	1.83139	2.71232
ENSG00000137269.14_2	LRRC1	chr6:53659295-53788919	+	protein_coding	1.62999	3.09511	0.00293996	0.0245362	3.51426	1.88427	2.59497	2.67171	2.3211	3.23684	15.9993	4.9566	13.1062	10.933
ENSG00000156535.13_4	CD109	chr6:74405508-74538040	+	protein_coding	1.62941	3.09386	0.00188519	0.0196283	3.83522	2.20582	3.29766	3.93266	2.83131	4.57708	8.23863	10.7054	21.6569	15.9385
ENSG00000175054.14_3	ATR	chr3:142168077-142297668	-	protein_coding	1.62878	3.0925	1.12715e-05	0.00277535	3.66925	2.04047	3.6098	3.39054	2.88696	2.6405	12.2474	12.3903	9.49615	13.069
ENSG00000139372.14_3	TDG	chr12:104359582-104382652	+	protein_coding	1.62675	3.08817	0.000412625	0.00964486	3.56739	1.94064	3.48391	2.87869	2.19324	2.91008	8.7241	17.1923	9.36027	9.77589
ENSG00000127423.10_2	AUNIP	chr1:26158404-26185949	-	protein_coding	1.62633	3.08727	0.0010381	0.0146638	1.77699	0.150655	0.165037	0.303368	0	0	2.144	4.29967	1.23614	2.70235
ENSG00000033178.12_2	UBA6	chr4:68478370-68566897	-	protein_coding	1.62601	3.08658	0.000160372	0.00690192	4.47616	2.85015	7.16619	6.53636	6.28261	5.03198	18.8955	16.6987	29.7177	21.6858
ENSG00000132746.14_3	ALDH3B2	chr11:67429633-67448671	-	protein_coding	1.6248	3.084	0.0328719	0.0983169	1.81253	0.187733	0	0.552111	0.0305523	0.0521063	1.00342	2.41672	1.05496	9.82239
ENSG00000187605.15_2	TET3	chr2:74213531-74335303	+	protein_coding	1.62469	3.08375	0.00113947	0.0153074	3.08009	1.4554	3.78755	1.65151	1.09263	1.12903	7.31163	7.76385	7.41186	7.34689
ENSG00000138346.14_3	DNA2	chr10:70173821-70231878	-	protein_coding	1.6237	3.08164	3.89203e-05	0.0044863	2.57488	0.951186	1.30412	0.952793	0.639493	0.894401	4.58003	5.55144	3.93725	5.98246
ENSG00000112877.7_2	CEP72	chr5:612387-667283	+	protein_coding	1.62366	3.08156	0.00133183	0.0165312	2.59289	0.969225	0.823856	1.22736	0.95877	0.846287	6.80161	7.3207	2.55066	4.74769
ENSG00000171320.14_2	ESCO2	chr8:27629466-27670157	+	protein_coding	1.62236	3.07879	0.0025794	0.0230764	1.69764	0.0752724	0.0420096	0.0909315	0.0598814	0.0226111	1.43812	4.71828	1.09692	2.78665
ENSG00000166508.17_3	MCM7	chr7:99690351-99699563	-	protein_coding	1.619	3.07162	3.14982e-05	0.00419	4.72767	3.10867	7.32778	7.29746	7.32443	8.62472	28.9003	21.2117	21.9445	31.3408
ENSG00000111669.14_2	TPI1	chr12:6976283-6980112	+	protein_coding	1.61779	3.06905	0.000385584	0.00936272	6.18062	4.56283	19.8471	29.1983	20.7231	21.8162	52.1049	85.9114	92.9747	62.8243
ENSG00000140279.12_2	DUOX2	chr15:45384848-45406542	-	protein_coding	1.61548	3.06413	0.0256961	0.0847907	1.90772	0.292237	0.275532	0.64796	0.0517947	0.0169955	6.0961	0.928491	1.07571	5.97775
ENSG00000270190.1_4	AC068491.3	chr2:112024445-112025050	-	lincRNA	1.61496	3.06303	0.00224086	0.021499	2.5509	0.935942	1.9874	0.922958	0.678372	0.389423	5.22133	6.03389	6.09776	2.79655
ENSG00000120254.15_3	MTHFD1L	chr6:151186685-151423023	+	protein_coding	1.6145	3.06206	0.00321746	0.0255768	3.17799	1.56349	2.85857	2.08396	1.66277	1.40859	6.16185	14.7803	8.9406	4.97219
ENSG00000225138.7_3	SLC9A3-AS1	chr5:473351-480999	+	processed_transcript	1.61351	3.05996	0.0237798	0.0805438	2.44023	0.826716	0.933286	0.913776	0.894211	0.412048	8.89859	1.25089	8.84256	2.9563
ENSG00000117593.9_2	DARS2	chr1:173793641-173827684	+	protein_coding	1.61129	3.05524	0.00295483	0.0245639	3.21804	1.60675	2.73399	2.34205	1.97518	1.31753	6.15188	16.0066	5.95168	7.86701
ENSG00000243317.7_2	C7orf73	chr7:135347244-135378166	+	protein_coding	1.60874	3.04984	0.00128403	0.0162777	2.86569	1.25696	2.49503	1.25641	1.10929	0.961197	8.24089	4.11133	8.33256	5.40306
ENSG00000169174.10_2	PCSK9	chr1:55505221-55530525	+	protein_coding	1.60856	3.04947	0.00555573	0.0340854	1.68905	0.0804942	0.0571987	0.102091	0	0.0728787	1.018	4.1301	1.06963	4.04523
ENSG00000185499.16_3	MUC1	chr1:155158300-155162707	-	protein_coding	1.60801	3.04831	0.0138362	0.0576022	2.99997	1.39196	1.84381	3.21803	0.884226	1.09865	3.12106	8.90739	5.87462	13.5916
ENSG00000182118.7_3	FAM89A	chr1:231154704-231175992	-	protein_coding	1.60424	3.04035	0.0144425	0.0590922	2.39359	0.789353	3.21593	0.597115	0.214052	0.0914626	4.00216	3.73237	6.24023	3.44821
ENSG00000171208.9_2	NETO2	chr16:47111614-47177908	-	protein_coding	1.60286	3.03745	3.54344e-05	0.0044404	1.72874	0.125881	0.248454	0.043619	0.019885	0.066866	2.88399	2.84699	1.98611	1.70462
ENSG00000109674.3_2	NEIL3	chr4:178230990-178284097	+	protein_coding	1.60217	3.03601	0.025096	0.0835104	2.12934	0.527167	1.77414	0.321357	0.0330626	0.138933	2.33661	9.40591	1.66447	2.96084
ENSG00000177485.6_3	ZBTB33	chrX:119384607-119392253	+	protein_coding	1.60137	3.03432	0.00113754	0.0153074	3.25585	1.65448	3.55054	1.95514	1.47952	1.94566	8.73685	8.29083	5.80888	12.5172
ENSG00000129194.7_2	SOX15	chr17:7491496-7493488	-	protein_coding	1.6008	3.03311	8.7529e-05	0.00562156	2.47153	0.870738	1.0471	0.699925	0.568474	1.04845	4.17876	3.34729	5.76423	5.21384
ENSG00000005884.17_2	ITGA3	chr17:48133332-48167845	+	protein_coding	1.59995	3.03133	0.0323697	0.0975042	3.32464	1.72468	1.30565	3.3794	2.03198	2.89754	3.47924	24.6744	11.1419	6.21554
ENSG00000187583.10_3	PLEKHN1	chr1:901877-911245	+	protein_coding	1.59853	3.02836	0.00380652	0.0277611	2.00863	0.410093	0.0845454	1.19009	0.0900257	0.204077	2.46252	1.67211	3.83635	4.85956
ENSG00000138795.9_2	LEF1	chr4:108968701-109090112	-	protein_coding	1.59396	3.01877	0.00210334	0.0207943	2.05482	0.460853	0.591897	0.602567	0.233167	0.140695	5.22523	1.56224	2.63972	4.13334
ENSG00000135052.16_3	GOLM1	chr9:88641061-88715088	-	protein_coding	1.59305	3.01687	0.0153433	0.061239	4.49169	2.89864	11.3333	6.98796	5.82813	3.59718	18.7728	45.1475	19.8254	12.4811
ENSG00000074800.13_3	ENO1	chr1:8921061-8939308	-	protein_coding	1.59273	3.0162	0.000383737	0.00936272	7.06017	5.46744	40.2786	51.7004	39.4498	42.5505	95.608	162.253	174.687	113.467
ENSG00000230453.9_2	ANKRD18B	chr9:33524392-33573007	+	protein_coding	1.59239	3.01549	0.0148566	0.0601006	1.70063	0.10824	0	0.331299	0	0.0140487	0.933192	6.2286	0.954407	3.08716
ENSG00000226476.3_2	LINC01748	chr1:60981388-61106163	-	lincRNA	1.59013	3.01076	1.88399e-06	0.00208233	1.66053	0.0704033	0.0289549	0.0822235	0.0830864	0.00785393	2.21807	2.06128	2.66469	1.76659
ENSG00000258018.1_3	LINC02457	chr12:116955663-116956625	+	lincRNA	1.58921	3.00885	0.0269095	0.0872734	1.58921	0	0	0	0	0	1.10155	0.242907	5.38409	3.91505
ENSG00000112414.14_3	ADGRG6	chr6:142622991-142767403	+	protein_coding	1.58895	3.00831	0.0280844	0.0894121	2.80692	1.21797	1.54451	2.19663	1.0105	0.790524	7.20895	12.8149	1.52758	7.36627
ENSG00000156711.16_2	MAPK13	chr6:36095586-36112301	+	protein_coding	1.58841	3.00719	0.0349881	0.102482	2.9388	1.35039	6.73946	1.36968	0.381728	0.66803	7.83961	5.03971	5.42325	9.08008
ENSG00000133135.13_4	RNF128	chrX:105937024-106040223	+	protein_coding	1.5884	3.00715	0.0212286	0.0751764	1.68031	0.0919128	0.0480023	0.16003	0	0.061311	0.494332	7.1641	2.35592	1.57708
ENSG00000244332.1_4	AL138759.1	chr10:96337196-96370995	+	sense_overlapping	1.58739	3.00505	0.0445584	0.119486	1.76848	0.181088	0	0.652159	0	0	4.54753	0.945199	0.476644	7.45514
ENSG00000101412.12_2	E2F1	chr20:32263489-32274210	-	protein_coding	1.58575	3.00164	0.00182054	0.0192922	2.20225	0.616503	0.382984	0.764213	0.430479	0.583048	2.316	6.43496	2.30584	4.50303
ENSG00000120539.14_2	MASTL	chr10:27443753-27475853	+	protein_coding	1.58478	2.99962	0.000307066	0.00867314	3.36745	1.78267	3.94811	2.21221	2.0052	1.93385	9.33139	10.2876	7.17953	10.894
ENSG00000204899.5_2	MZT1	chr13:73282495-73301825	-	protein_coding	1.58464	2.99933	0.0139644	0.0579583	3.25417	1.66953	3.25278	2.45521	1.53544	1.74864	4.06025	20.3555	7.86152	7.65417
ENSG00000149527.17_3	PLCH2	chr1:2357419-2436969	+	protein_coding	1.58449	2.99901	0.00165087	0.0184876	1.6775	0.0930135	0.0890691	0.0991912	0.0180697	0.0619234	3.4928	1.11676	1.41308	3.56196
ENSG00000183048.11_3	SLC25A10	chr17:79679266-79688046	+	protein_coding	1.58428	2.99859	0.00361546	0.0271372	1.99836	0.414077	0.668717	0.248521	0.239362	0.220736	6.3745	2.63665	1.48996	2.81627
ENSG00000149554.12_2	CHEK1	chr11:125495031-125546150	+	protein_coding	1.58423	2.99848	0.00289644	0.0244018	2.04846	0.464229	0.424742	0.548284	0.210832	0.356178	3.29451	6.45248	1.61016	2.50516
ENSG00000070526.14_3	ST6GALNAC1	chr17:74620843-74639920	-	protein_coding	1.58362	2.9972	0.01322	0.0560021	2.38529	0.801671	0.714673	1.30031	0.559081	0.501318	3.30148	10.5862	1.75057	4.43492
ENSG00000105738.10_3	SIPA1L3	chr19:38397868-38699012	+	protein_coding	1.58319	2.99633	0.000387522	0.009384	3.13915	1.55595	2.45803	2.22914	1.45436	1.72708	11.5102	5.66511	6.95776	8.07915
ENSG00000085377.13_3	PREP	chr6:105725440-105850959	-	protein_coding	1.58243	2.99474	0.000110098	0.0059213	3.34659	1.76416	3.08589	2.70505	2.13768	1.80264	8.24844	11.703	7.45173	9.78378
ENSG00000162777.16_2	DENND2D	chr1:111729796-111747157	-	protein_coding	1.58232	2.9945	0.00977996	0.0469585	3.07589	1.49357	3.34353	2.42264	1.12351	0.991509	6.92091	8.66225	3.72366	12.9832
ENSG00000169242.11_2	EFNA1	chr1:155099936-155107333	+	protein_coding	1.58185	2.99354	0.00346988	0.0266159	3.28472	1.70287	2.06175	2.66293	1.75324	2.63763	7.17881	11.1581	14.9036	4.70357
ENSG00000111358.13_3	GTF2H3	chr12:124118286-124147153	+	protein_coding	1.5812	2.99219	0.00160977	0.0182188	3.03841	1.45721	1.66259	1.31186	3.71766	0.957303	7.28034	7.23748	5.98013	8.56977
ENSG00000276180.1_2	HIST1H4I	chr6:27106367-27107660	+	protein_coding	1.58085	2.99145	0.0497364	0.127956	2.21163	0.630787	1.13623	0.431504	0.359119	0.383072	2.62372	8.13007	0.50618	8.23775
ENSG00000183765.20_2	CHEK2	chr22:29083731-29138410	-	protein_coding	1.57937	2.98839	0.00146494	0.0173338	2.26661	0.687239	1.00817	0.629217	0.364693	0.505582	3.49695	7.05251	2.4926	3.23905
ENSG00000283398.1_3	AC114737.3	chr7:76589888-76607975	+	processed_transcript	1.57756	2.98464	0.0105094	0.0490563	1.67162	0.0940612	0	0.297959	0	0	5.96192	1.35935	0.82582	2.43439
ENSG00000116990.10_3	MYCL	chr1:40361098-40367928	-	protein_coding	1.57706	2.98362	0.00321587	0.0255768	1.88174	0.304673	0.187013	0.590527	0.17384	0.0501659	5.57524	1.47872	1.9381	2.85151
ENSG00000160193.11_2	WDR4	chr21:44263204-44299678	-	protein_coding	1.57634	2.98212	0.000164087	0.00690192	2.60541	1.02907	1.53659	1.34385	0.852288	0.574848	6.26833	4.11924	5.29881	4.85235
ENSG00000279995.1_4	AC139792.3	chr5:34124267-34124490	-	TEC	1.57535	2.98007	0.000155199	0.00682235	2.26226	0.686913	1.13482	0.698128	0.357475	0.364781	3.4934	4.45889	4.36231	3.0272
ENSG00000169627.7_2	BOLA2B	chr16:30204255-30205627	-	protein_coding	1.57515	2.97967	6.26955e-05	0.00515164	3.22054	1.64539	2.89401	1.97853	1.84099	1.90656	7.99488	6.61514	8.7278	10.33
ENSG00000151136.14_3	BTBD11	chr12:107712190-108053419	+	protein_coding	1.57264	2.97448	0.0120657	0.0532643	2.05092	0.478284	0.952286	0.591289	0.0873674	0.114916	1.02162	6.37325	4.04115	2.92347
ENSG00000130695.14_2	CEP85	chr1:26560644-26605529	+	protein_coding	1.57241	2.97401	0.000112559	0.00596805	2.99841	1.426	1.50312	2.39735	1.32824	1.63287	5.9044	9.21725	7.22888	6.02506
ENSG00000138413.13_2	IDH1	chr2:209100951-209130798	-	protein_coding	1.57141	2.97194	0.0196052	0.0713975	4.31045	2.73904	10.4542	5.55897	3.62876	4.71304	22.5748	33.3142	7.91083	20.5008
ENSG00000263528.7_1	IKBKE	chr1:206643819-206670222	+	protein_coding	1.57121	2.97153	0.00455038	0.0304236	2.48123	0.910024	1.69992	0.846514	0.443831	0.73204	3.84494	2.89671	4.03553	9.22505
ENSG00000271079.1_3	CTAGE15	chr7:143268894-143271480	+	protein_coding	1.5689	2.96678	0.00166342	0.0185446	2.49533	0.92643	1.14584	1.79433	0.214411	0.791809	6.33495	4.11645	3.62192	4.82754
ENSG00000171295.12_2	ZNF440	chr19:11925099-11946016	+	protein_coding	1.56878	2.96654	0.000361536	0.00911052	2.76745	1.19867	0.985727	1.57054	1.01565	1.6976	6.53479	4.68605	4.38345	8.31956
ENSG00000107438.8_2	PDLIM1	chr10:96997329-97050781	-	protein_coding	1.56793	2.96479	0.00606312	0.0358421	4.76342	3.19549	16.8646	7.03008	5.87961	6.13638	33.4314	17.4291	28.5972	27.9751
ENSG00000271321.1_2	CTAGE6	chr7:143452182-143454789	-	protein_coding	1.56763	2.96418	0.00153694	0.0178382	2.82082	1.25319	1.36632	2.22812	0.679113	1.51702	4.99851	4.26201	9.13341	6.79212
ENSG00000104889.5_2	RNASEH2A	chr19:12912877-12924452	+	protein_coding	1.56755	2.96402	0.0192009	0.0704761	3.54433	1.97677	4.46106	4.03027	2.23039	1.70487	6.76302	24.0038	5.86821	12.8967
ENSG00000184216.13_3	IRAK1	chrX:153275951-153285431	-	protein_coding	1.56708	2.96305	0.00226561	0.0215715	4.04634	2.47926	5.9855	7.28025	2.78083	3.42075	16.5241	16.6518	18.8497	11.1367
ENSG00000204580.13_3	DDR1	chr6:30844198-30867933	+	protein_coding	1.56631	2.96146	0.0010663	0.0148374	2.72811	1.1618	1.16507	1.21439	1.25195	1.32096	7.97762	4.01428	3.64299	8.22161
ENSG00000050327.14_3	ARHGEF5	chr7:144052381-144077725	+	protein_coding	1.56505	2.95888	0.00268935	0.0235331	4.04236	2.47731	2.38225	7.915	4.45383	4.84727	15.7451	11.4749	17.2992	18.2811
ENSG00000058262.9_2	SEC61A1	chr3:127770484-127790526	+	protein_coding	1.56496	2.9587	0.00816025	0.0422809	3.80504	2.24008	4.80081	3.07497	2.47324	5.06703	27.2888	8.50596	9.79425	12.1499
ENSG00000105855.9_2	ITGB8	chr7:20370325-20455377	+	protein_coding	1.5634	2.9555	0.0150118	0.0604663	3.83865	2.27525	10.6112	2.95847	2.59758	2.32092	12.308	18.6438	14.222	9.52908
ENSG00000102384.13_2	CENPI	chrX:100353207-100418670	+	protein_coding	1.56213	2.95289	0.00127593	0.0162302	1.67346	0.11133	0.0803972	0.0723189	0.0208508	0.15129	1.36749	3.34808	1.23812	3.49342
ENSG00000065911.11_2	MTHFD2	chr2:74425689-74444692	+	protein_coding	1.56152	2.95164	0.0158338	0.0624614	3.36993	1.80841	4.51475	2.31611	1.72989	2.01472	7.14252	21.8846	5.05431	9.12598
ENSG00000160957.12_3	RECQL4	chr8:145736671-145743229	-	protein_coding	1.56094	2.95046	0.00109946	0.0151015	2.07746	0.516524	0.654929	0.68268	0.232321	0.22026	5.18285	3.23734	1.79888	3.32761
ENSG00000112029.9_3	FBXO5	chr6:153291654-153304714	-	protein_coding	1.56089	2.95037	0.00832337	0.042862	2.89174	1.33085	2.2117	1.57594	1.3849	1.02936	3.92773	13.3654	3.78608	7.95492
ENSG00000147044.20_4	CASK	chrX:41374187-41782716	-	protein_coding	1.56085	2.95028	1.27092e-05	0.00290793	4.15124	2.59039	4.60436	5.70767	4.80663	5.02722	13.6172	18.923	16.2134	18.8843
ENSG00000114315.3_2	HES1	chr3:193853934-193856521	+	protein_coding	1.55857	2.94563	0.00150651	0.0176297	5.45144	3.89287	9.5021	18.4153	20.1264	10.304	48.4464	49.3752	36.1672	38.5984
ENSG00000253784.1_3	AC090735.1	chr8:73787094-73793975	-	lincRNA	1.55846	2.94539	0.046209	0.122199	1.55846	0	0	0	0	0	9.01563	1.47801	0.322801	1.29244
ENSG00000126822.16_3	PLEKHG3	chr14:65170820-65216965	+	protein_coding	1.55823	2.94493	0.0019026	0.0197269	3.71529	2.15706	4.05013	4.37113	3.41302	2.30562	7.87656	19.3339	10.5985	13.2164
ENSG00000104687.12_3	GSR	chr8:30535578-30585443	-	protein_coding	1.55821	2.94488	0.0144892	0.0591492	4.94868	3.39047	9.01564	10.7649	7.64536	10.8708	31.5002	70.9066	21.0131	16.6792
ENSG00000189376.11_3	C8orf76	chr8:124232197-124253638	-	protein_coding	1.55701	2.94244	0.000331509	0.00894146	2.84653	1.28952	2.23697	1.50288	0.800969	1.44712	6.26995	8.10641	5.55246	5.17002
ENSG00000254986.7_3	DPP3	chr11:66247484-66277128	+	protein_coding	1.557	2.94242	3.20796e-05	0.00422224	2.97804	1.42103	1.22702	2.48684	1.71655	1.43738	6.76127	7.08346	6.79729	6.87846
ENSG00000100911.15_3	PSME2	chr14:24612571-24616779	-	protein_coding	1.55693	2.94227	0.00094449	0.0139565	3.8242	2.26727	5.78623	3.98353	2.9536	3.01705	10.024	13.1508	11.8447	19.0887
ENSG00000262714.1_3	AC007342.5	chr16:53420856-53422997	+	lincRNA	1.55659	2.94158	0.00750634	0.04035	2.17069	0.614096	1.94412	0.264061	0.418565	0.039614	3.85766	4.08576	4.7401	1.89779
ENSG00000106803.9_2	SEC61B	chr9:101984346-101992897	+	protein_coding	1.55606	2.94051	0.000700308	0.0120534	4.89809	3.34203	14.7363	8.23075	7.61038	7.45364	28.375	36.7813	26.2604	25.1281
ENSG00000233493.3_2	TMEM238	chr19:55890613-55895966	-	protein_coding	1.55538	2.9391	0.00394789	0.028285	1.91583	0.360449	0.679515	0.370458	0.049251	0.124852	4.9568	3.75816	2.10113	1.30628
ENSG00000164379.6_3	FOXQ1	chr6:1312675-1314983	+	protein_coding	1.55472	2.93776	0.0331442	0.0988539	2.63892	1.0842	0.961863	1.73906	1.29286	0.640078	18.1222	3.5729	2.85608	3.46379
ENSG00000280032.1_3	AP002800.1	chr11:118135308-118137532	+	TEC	1.55464	2.9376	0.000264141	0.00821996	1.69623	0.141592	0.099477	0.167206	0.132359	0.019004	3.41014	2.51193	1.27035	2.136
ENSG00000170113.15_4	NIPA1	chr15:23043277-23100005	-	protein_coding	1.55423	2.93678	0.00475852	0.0311967	2.363	0.808766	1.55096	0.335594	0.170451	1.36113	4.01456	6.50477	4.13045	2.62751
ENSG00000070214.15_2	SLC44A1	chr9:108006903-108201452	+	protein_coding	1.55417	2.93665	0.000733799	0.0122895	3.89539	2.34121	5.73832	3.47793	2.85591	4.66692	18.8338	12.711	14.8446	10.3803
ENSG00000173715.15_4	C11orf80	chr11:66511922-66610799	+	protein_coding	1.55416	2.93663	0.000195424	0.00738618	2.14084	0.586677	0.790686	0.584117	0.37816	0.301138	3.84336	2.52487	4.78646	2.82931
ENSG00000203644.3_4	AC083799.1	chr3:129565891-129566800	-	sense_intronic	1.55397	2.93625	0.00925618	0.0453884	3.40577	1.8518	6.90372	1.73885	2.29962	1.3764	8.34862	9.86938	8.08511	12.6669
ENSG00000184995.7_3	IFNE	chr9:21480838-21482312	-	protein_coding	1.54872	2.92557	0.0134435	0.0566368	1.6534	0.104683	0.016819	0.314642	0	0	1.48194	6.77166	1.34486	1.16505
ENSG00000127191.17_2	TRAF2	chr9:139776364-139821059	+	protein_coding	1.54701	2.9221	2.11207e-05	0.00358504	2.9988	1.4518	2.02211	2.00068	1.63159	1.34634	6.71878	5.85874	7.14684	8.46538
ENSG00000188372.14_3	ZP3	chr7:76026835-76071388	+	protein_coding	1.54697	2.92202	0.00118174	0.0155613	1.8454	0.298437	0.277065	0.296915	0	0.381112	3.47245	4.12133	1.95206	1.46622
ENSG00000249859.9_3	PVT1	chr8:128806779-129113499	+	lincRNA	1.54536	2.91877	1.34952e-05	0.0029316	2.15148	0.606117	0.636701	0.55848	0.614465	0.303583	3.85629	3.05095	4.06312	2.91162
ENSG00000198492.15_3	YTHDF2	chr1:29063133-29096287	+	protein_coding	1.54448	2.91698	0.0273772	0.0881134	3.94698	2.4025	2.91494	6.59253	2.21237	7.18391	18.6694	22.3741	5.63908	17.5353
ENSG00000106683.14_2	LIMK1	chr7:73497263-73536855	+	protein_coding	1.54333	2.91466	6.35481e-05	0.00515164	2.23363	0.690307	0.889476	0.660607	0.429238	0.511818	3.85959	3.52482	4.86309	2.79521
ENSG00000177054.13_2	ZDHHC13	chr11:19138646-19197969	+	protein_coding	1.54326	2.91453	0.00401417	0.0285134	2.04051	0.497246	0.504798	0.817885	0.184576	0.225	2.87815	4.30685	1.3028	5.04365
ENSG00000136379.11_3	ABHD17C	chr15:80972025-81047962	+	protein_coding	1.54013	2.90821	0.00592991	0.0353421	2.61513	1.075	2.38512	1.12667	0.620165	0.688882	6.64386	4.37339	2.79569	8.03822
ENSG00000277013.1_3	AC008556.1	chr19:34397257-34399296	+	lincRNA	1.53722	2.90236	0.000694516	0.0120414	1.91919	0.381966	0.246069	0.543091	0.288233	0.164139	3.2777	4.06431	1.44591	2.86157
ENSG00000119333.11_2	WDR34	chr9:131395940-131419066	-	protein_coding	1.53553	2.89894	0.000206209	0.00752104	3.12105	1.58553	2.11097	2.38879	1.63067	1.92522	7.6642	11.2194	5.91438	6.82694
ENSG00000136518.16_3	ACTL6A	chr3:179280668-179306196	+	protein_coding	1.53537	2.89862	0.000744489	0.0123792	4.3999	2.86453	4.23933	7.51125	6.45099	7.46753	15.8146	26.671	16.3667	23.5797
ENSG00000141424.12_3	SLC39A6	chr18:33688495-33709348	-	protein_coding	1.535	2.89788	0.00207221	0.0205704	5.05341	3.51841	11.9925	10.916	9.53933	9.56717	33.9428	46.4295	37.9656	17.829
ENSG00000136950.13_2	ARPC5L	chr9:127624409-127640012	+	protein_coding	1.53474	2.89735	1.61837e-05	0.00319909	3.74708	2.21235	3.55905	4.2641	3.61459	3.16485	11.5272	15.4539	12.1443	10.9971
ENSG00000181544.13_2	FANCB	chrX:14861529-14891191	-	protein_coding	1.53355	2.89497	0.00394948	0.0282873	2.42322	0.889678	1.41683	0.9211	0.631034	0.556038	2.90732	7.82495	2.64289	5.58895
ENSG00000141738.13_3	GRB7	chr17:37894180-37903544	+	protein_coding	1.5324	2.89267	0.000423678	0.00975289	1.64213	0.109731	0.0623957	0.246572	0	0.0235898	3.0455	1.2396	1.69668	2.88464
ENSG00000139433.9_3	GLTP	chr12:110288748-110318293	-	protein_coding	1.53218	2.89222	0.0231284	0.0791129	4.73545	3.20327	7.68186	10.1523	6.71198	8.63785	34.8984	12.9588	15.6168	59.4746
ENSG00000008323.15_2	PLEKHG6	chr12:6419602-6437672	+	protein_coding	1.53131	2.89049	0.000731396	0.0122802	1.90592	0.374611	0.715741	0.592602	0.0139318	0.0197848	2.20082	3.11977	2.23625	3.62152
ENSG00000096092.5_2	TMEM14A	chr6:52535907-52551386	+	protein_coding	1.53032	2.88849	0.000936468	0.0138765	4.98974	3.45942	10.1839	10.9043	9.89448	9.09382	41.6125	37.7512	18.6453	30.4168
ENSG00000063660.8_3	GPC1	chr2:241375088-241407495	+	protein_coding	1.52978	2.88741	0.0020029	0.020251	4.05061	2.52084	3.79533	5.6087	4.95543	4.74832	18.4111	22.6998	15.9598	8.66516
ENSG00000140832.9_3	MARVELD3	chr16:71660064-71676017	+	protein_coding	1.52901	2.88587	0.000133564	0.00645461	1.61818	0.0891776	0.0776341	0.17031	0.0153329	0	2.89044	2.53486	1.79732	1.30874
ENSG00000126460.10_2	PRRG2	chr19:50083903-50094272	+	protein_coding	1.52853	2.88491	0.00364864	0.0272764	1.83487	0.306346	0.314023	0.278192	0.222769	0.138501	4.00753	3.1915	0.822137	3.23478
ENSG00000241484.9_3	ARHGAP8	chr22:45148438-45258668	+	protein_coding	1.52674	2.88133	0.00385424	0.0279632	1.61901	0.0922707	0.131058	0.123562	0	0.0163028	1.76215	4.6044	0.843317	2.11963
ENSG00000160131.13_2	VMA21	chrX:150564987-150577836	+	protein_coding	1.52621	2.88028	0.000159576	0.00690192	3.78662	2.26042	5.33628	3.99731	2.90559	3.26144	15.2614	13.6728	11.085	11.5786
ENSG00000132507.17_2	EIF5A	chr17:7210318-7215782	+	protein_coding	1.52538	2.87862	0.00049287	0.0101947	5.11535	3.58997	12.3922	13.0142	8.47298	10.8263	29.9095	46.6456	25.2432	36.3557
ENSG00000141524.15_3	TMC6	chr17:76106539-76128488	-	protein_coding	1.52462	2.87711	0.00320722	0.0255768	2.77524	1.25062	3.06262	1.58022	0.725402	0.772323	6.8186	4.96136	4.63409	7.36416
ENSG00000165935.9_3	SMCO2	chr12:27619743-27655118	+	protein_coding	1.52384	2.87555	0.0413598	0.113955	1.74697	0.22313	0.0856677	0.161288	0.331811	0.105595	1.05141	0.800917	9.6918	2.21338
ENSG00000114115.9_2	RBP1	chr3:139236276-139258671	-	protein_coding	1.52341	2.8747	0.00294935	0.0245639	3.42725	1.90384	1.86132	3.83579	2.35478	3.22426	5.24501	10.5857	12.8773	12.337
ENSG00000242114.5_3	MTFP1	chr22:30821518-30825040	+	protein_coding	1.52313	2.87414	0.0152443	0.0610288	1.69921	0.176073	0.0862163	0.177265	0	0.274157	1.30464	6.18845	2.81985	0.756964
ENSG00000100304.12_2	TTLL12	chr22:43562628-43583139	-	protein_coding	1.52064	2.86918	0.00225877	0.0215339	4.04464	2.524	5.64487	6.14433	4.05828	3.55772	11.0211	26.4345	13.7773	14.2193
ENSG00000102471.13_2	NDFIP2	chr13:80055259-80130210	+	protein_coding	1.51958	2.86708	0.00303911	0.0248268	3.49997	1.98039	4.35429	3.06646	2.37425	2.30011	5.82894	14.2733	13.9973	9.47325
ENSG00000143977.13_2	SNRPG	chr2:70508494-70520903	-	protein_coding	1.51875	2.86542	0.00463489	0.0306912	4.88692	3.36818	12.0916	10.0971	7.75194	7.94088	22.8673	49.482	17.399	33.5706
ENSG00000001630.15_3	CYP51A1	chr7:91741465-91772266	-	protein_coding	1.5165	2.86097	0.00029411	0.00850995	4.68438	3.16788	8.46053	8.2106	7.24346	8.08229	29.6585	33.4208	19.0109	19.6976
ENSG00000134215.15_2	VAV3	chr1:108113782-108507766	-	protein_coding	1.51544	2.85885	0.010901	0.0499917	3.1495	1.63406	5.42365	2.12203	1.22832	1.07686	6.61454	5.66752	9.8907	10.2126
ENSG00000169991.10_3	IFFO2	chr1:19230775-19283180	-	protein_coding	1.51526	2.85851	0.0375825	0.107409	3.81181	2.29654	1.47732	4.40327	6.35277	4.91864	13.7808	7.20997	32.5465	8.55401
ENSG00000137266.14_2	SLC22A23	chr6:3269196-3457256	-	protein_coding	1.51449	2.85698	0.00143594	0.0171921	2.35659	0.842099	0.699021	0.84305	0.975047	0.669838	5.1689	2.06618	6.15927	4.08092
ENSG00000233927.4_2	RPS28	chr19:8386042-8388224	+	protein_coding	1.51416	2.85632	0.0050928	0.0324648	4.76056	3.2464	13.2296	5.22282	9.88217	7.41706	15.5546	27.9841	31.7526	33.3524
ENSG00000196072.11_3	BLOC1S2	chr10:102033037-102046469	-	protein_coding	1.51367	2.85536	0.00273554	0.0237248	3.17226	1.65859	4.55134	2.14806	1.35574	1.4131	8.50004	6.41246	7.67116	9.81488
ENSG00000105088.8_2	OLFM2	chr19:9964394-10047228	-	protein_coding	1.51361	2.85523	0.000229137	0.00780108	2.09014	0.576529	0.604702	0.562697	0.763196	0.11851	3.60998	2.25802	3.80439	3.55497
ENSG00000168393.12_3	DTYMK	chr2:242615157-242626406	-	protein_coding	1.51226	2.85256	0.00626799	0.036443	2.95624	1.44398	2.49746	1.59618	1.47355	1.43958	7.51901	13.2066	3.50743	5.65057
ENSG00000144867.11_3	SRPRB	chr3:133502877-133544616	+	protein_coding	1.51066	2.84941	0.000640572	0.0116136	3.15113	1.64047	2.53863	2.64889	1.74015	1.67025	10.3394	9.72073	5.17689	7.29386
ENSG00000173894.10_2	CBX2	chr17:77751931-77761782	+	protein_coding	1.51	2.8481	0.0101542	0.0480036	1.80925	0.299248	0.254811	0.358138	0.111287	0.210547	1.52073	6.45428	1.11009	2.80465
ENSG00000137880.5_2	GCHFR	chr15:41056218-41059908	+	protein_coding	1.50972	2.84755	0.0259068	0.0852202	2.64023	1.13051	3.32992	0.971386	0.708814	0.575138	8.89795	4.77444	2.00137	7.80593
ENSG00000101444.12_3	AHCY	chr20:32868074-32899608	-	protein_coding	1.50863	2.8454	0.00425883	0.0294543	4.38599	2.87735	6.32161	7.06578	5.29407	6.84317	17.0804	39.9428	13.9856	16.2263
ENSG00000005022.5_2	SLC25A5	chrX:118602363-118605282	+	protein_coding	1.50745	2.84306	0.000300894	0.00863141	6.05364	4.54619	17.0278	24.3321	22.0772	27.2726	75.43	69.5865	48.0589	72.5536
ENSG00000175305.17_3	CCNE2	chr8:95891998-95908906	-	protein_coding	1.50678	2.84175	0.0140432	0.0581021	2.25351	0.746731	0.630743	1.25597	0.430667	0.506249	2.83047	8.68847	1.50306	4.56565
ENSG00000243896.4_4	OR2A7	chr7:143954756-143961885	-	protein_coding	1.50648	2.84116	4.76602e-05	0.00491432	1.66003	0.153549	0.234632	0.0696639	0.0469527	0.107082	2.9408	1.58735	1.85093	2.43124
ENSG00000136153.19_3	LMO7	chr13:76194570-76434006	+	protein_coding	1.50614	2.84049	0.0218358	0.0766273	4.09519	2.58905	4.12698	10.6214	4.25202	3.18876	15.8862	16.7494	8.05873	30.4284
ENSG00000205268.10_2	PDE7A	chr8:66629745-66754557	-	protein_coding	1.5053	2.83883	0.0452056	0.120615	3.64347	2.13817	8.04829	3.1671	2.35796	1.9658	5.36627	26.8087	15.1159	7.54788
ENSG00000226887.7_3	ERVMER34-1	chr4:53588785-53617807	-	protein_coding	1.50393	2.83614	0.00535938	0.0333193	1.57192	0.0679877	0.0552396	0.109781	0	0.0310439	2.48282	2.74964	3.15151	0.440951
ENSG00000144136.10_3	SLC20A1	chr2:113403434-113421404	+	protein_coding	1.5034	2.8351	0.00566137	0.0344877	3.744	2.2406	7.18148	2.95472	3.82214	2.19712	11.037	16.1582	15.7028	8.34208
ENSG00000178585.14_2	CTNNBIP1	chr1:9908334-9970394	-	protein_coding	1.50334	2.83499	0.000862198	0.0132316	3.37002	1.86668	3.47033	3.26386	1.78478	2.33251	9.44503	6.54739	9.2061	13.2018
ENSG00000139998.14_2	RAB15	chr14:65412532-65439494	-	protein_coding	1.5029	2.83412	0.0165516	0.0641285	2.6208	1.1179	0.867104	1.87737	1.43936	0.692968	5.22793	10.8042	5.81413	1.85739
ENSG00000143870.12_3	PDIA6	chr2:10923517-10978103	-	protein_coding	1.50278	2.83389	0.00151677	0.0177128	6.16494	4.66215	24.0811	30.2986	18.9322	25.2644	65.6792	99.9722	45.9185	82.9051
ENSG00000144354.13_2	CDCA7	chr2:174219548-174233725	+	protein_coding	1.50276	2.83383	0.0210555	0.0748159	2.76844	1.26569	0.438501	1.56638	4.81984	0.555598	4.90126	4.99066	5.78671	7.98375
ENSG00000076248.10_2	UNG	chr12:109535379-109548797	+	protein_coding	1.50271	2.83375	0.00015027	0.00673003	3.77279	2.27008	2.85159	4.23163	4.071	4.2976	12.934	16.1634	9.66173	12.6896
ENSG00000166710.17_2	B2M	chr15:45003675-45011075	+	protein_coding	1.50033	2.82908	0.00469285	0.0309104	6.39808	4.89775	37.2881	28.3921	22.2395	29.1965	80.1931	62.595	155.571	61.5752
ENSG00000186212.3_2	SOWAHB	chr4:77816081-77819300	-	protein_coding	1.49943	2.82731	0.031887	0.0965718	1.63875	0.139318	0.017696	0.373738	0	0.052527	6.8775	0.964208	0.55491	2.90813
ENSG00000165661.16_3	QSOX2	chr9:139098179-139137687	-	protein_coding	1.49811	2.82472	0.000179234	0.0071396	2.70328	1.20517	2.04545	1.37486	0.924946	1.02985	5.78072	6.51399	5.67713	4.28861
ENSG00000065357.19_3	DGKA	chr12:56321103-56347811	+	protein_coding	1.49711	2.82278	0.000884166	0.0134012	2.77918	1.28206	2.31957	1.72558	0.956633	0.975645	7.31417	4.62714	4.70814	7.31502
ENSG00000183828.14_3	NUDT14	chr14:105639275-105647660	-	protein_coding	1.49674	2.82205	0.00311039	0.0251154	2.3849	0.888152	1.44059	0.834356	0.477952	0.773386	5.072	7.20576	2.40796	3.38285
ENSG00000135249.7_2	RINT1	chr7:105172532-105208124	+	protein_coding	1.49613	2.82086	3.52082e-06	0.00223152	3.64213	2.146	3.98964	3.30371	3.06074	3.40068	11.5738	10.1953	11.2657	13.0724
ENSG00000064012.21_4	CASP8	chr2:202098166-202152434	+	protein_coding	1.496	2.8206	0.0116122	0.0519127	3.40207	1.90607	5.16717	2.70885	2.02588	1.85071	6.35434	7.1749	19.4788	9.14298
ENSG00000129667.12_3	RHBDF2	chr17:74466973-74497872	-	protein_coding	1.49529	2.8192	0.00392862	0.0282192	2.57983	1.08454	3.10892	0.82999	0.63746	0.642756	5.19695	4.79999	5.76075	4.25806
ENSG00000115514.11_2	TXNDC9	chr2:99935445-99957165	-	protein_coding	1.49501	2.81867	0.00113271	0.0152953	3.654	2.15899	4.14507	4.22205	2.31223	3.47022	10.1638	15.8382	7.9288	13.9609
ENSG00000107984.9_2	DKK1	chr10:54074056-54077802	+	protein_coding	1.49493	2.81851	0.0190763	0.0702026	1.67341	0.178478	0.232999	0.33029	0	0	2.0766	5.2631	0.372197	2.91481
ENSG00000110660.14_4	SLC35F2	chr11:107661717-107799019	-	protein_coding	1.4947	2.81806	0.0356323	0.103762	2.21532	0.720615	1.26236	0.910333	0.170351	0.457878	1.34657	10.4622	2.0133	4.73804
ENSG00000100479.12_2	POLE2	chr14:50110273-50155140	-	protein_coding	1.49407	2.81682	0.00160548	0.0182163	1.82403	0.329963	0.61083	0.301127	0.0614736	0.122113	2.56005	4.3348	1.36505	2.49896
ENSG00000129173.12_2	E2F8	chr11:19245610-19263167	-	protein_coding	1.49308	2.8149	0.000173201	0.00705251	1.58198	0.0888991	0.0272468	0.245576	0	0	1.6707	2.58855	1.29573	2.65117
ENSG00000261804.1_3	AC007342.4	chr16:53407405-53418657	+	lincRNA	1.49256	2.81389	0.0137532	0.057412	2.06259	0.570029	1.91922	0.0840944	0.428264	0.0745846	3.60476	4.01007	4.48737	1.40544
ENSG00000221955.10_3	SLC12A8	chr3:124801480-124931708	-	protein_coding	1.49183	2.81246	5.00708e-05	0.00495641	1.61554	0.123714	0.135604	0.123029	0.0648792	0.0376436	2.11691	2.94209	1.44623	1.93334
ENSG00000125877.12_2	ITPA	chr20:3189514-3204516	+	protein_coding	1.49015	2.80918	7.26878e-05	0.00536762	2.81549	1.32534	1.83257	1.25845	1.44749	1.51858	8.30077	5.20623	5.92453	5.14392
ENSG00000163629.12_3	PTPN13	chr4:87515468-87736324	+	protein_coding	1.49011	2.80911	0.0231762	0.0791948	4.61578	3.12567	17.4301	7.59327	4.74773	5.37521	43.0511	14.9657	19.2667	24.3528
ENSG00000099219.13_2	ERMP1	chr9:5765076-5833117	-	protein_coding	1.48984	2.80858	0.00523926	0.0329664	2.8133	1.32346	2.32442	1.88425	0.804174	1.26767	8.81461	6.99321	2.92223	6.93284
ENSG00000137628.16_3	DDX60	chr4:169137444-169239958	-	protein_coding	1.48933	2.80759	0.00464618	0.0307387	5.27377	3.78444	18.3048	13.431	9.43169	11.405	27.2753	28.8164	38.9412	65.5224
ENSG00000013573.16_3	DDX11	chr12:31226779-31257725	+	protein_coding	1.48921	2.80736	0.00677903	0.0380725	2.73776	1.24855	0.683217	1.91127	2.42692	0.897897	2.81014	6.61134	8.00603	6.57976
ENSG00000134909.18_2	ARHGAP32	chr11:128834955-129149219	-	protein_coding	1.48909	2.80713	0.0013559	0.0166749	2.61649	1.1274	1.6218	1.54295	0.825229	0.871837	7.88764	4.9208	3.15999	5.46119
ENSG00000283000.1_3	AL392046.2	chr10:35258837-35264506	+	lincRNA	1.48805	2.8051	0.00292174	0.024474	1.48805	0	0	0	0	0	3.574	0.802094	1.16277	2.47301
ENSG00000144959.9_3	NCEH1	chr3:172348039-172429008	-	protein_coding	1.48749	2.804	0.000384448	0.00936272	2.75937	1.27188	1.60749	1.22362	1.71536	1.15968	6.09734	5.9027	3.74628	8.03952
ENSG00000244038.9_4	DDOST	chr1:20978260-20988037	-	protein_coding	1.48633	2.80175	0.00123073	0.0159336	4.34413	2.8578	10.1117	6.10242	4.09032	5.87395	19.4887	22.4552	15.187	20.8743
ENSG00000178718.6_2	RPP25	chr15:75246757-75249805	-	protein_coding	1.48529	2.79974	0.0337626	0.100084	2.94589	1.4606	2.93678	2.51792	0.748318	1.36967	8.25697	16.6838	3.02701	4.34782
ENSG00000167114.12_3	SLC27A4	chr9:131102925-131123749	+	protein_coding	1.48449	2.79818	1.17692e-05	0.00284	2.68676	1.20227	1.32249	1.44424	1.32827	1.12101	6.90746	5.39786	4.92341	4.73504
ENSG00000164305.18_3	CASP3	chr4:185548850-185570663	-	protein_coding	1.48314	2.79557	0.0132113	0.0560021	4.70622	3.22308	8.44905	10.5188	7.22726	7.49034	19.3208	57.89	14.7987	23.5613
ENSG00000151694.12_2	ADAM17	chr2:9628615-9695921	-	protein_coding	1.48242	2.79417	0.0023532	0.0219753	4.83519	3.35276	16.5177	8.25274	7.87047	6.57596	22.9492	34.3033	29.2696	24.9437
ENSG00000168003.16_3	SLC3A2	chr11:62623574-62656347	+	protein_coding	1.48214	2.79364	0.0101699	0.0480372	3.25132	1.76918	3.91084	2.12012	2.43914	1.56169	8.20792	17.6454	7.09709	4.91454
ENSG00000136802.11_2	LRRC8A	chr9:131644391-131680318	+	protein_coding	1.48093	2.79129	0.0120952	0.0533401	4.36426	2.88332	4.91793	7.3613	6.75531	6.72366	26.6572	21.6316	30.4543	8.13868
ENSG00000167196.13_3	FBXO22	chr15:76196200-76234851	+	protein_coding	1.48012	2.78972	0.00238562	0.0221394	2.4784	0.998281	0.465411	1.34999	0.410565	2.27817	4.32842	4.80747	4.92635	4.25918
ENSG00000111786.8_2	SRSF9	chr12:120899471-120907596	-	protein_coding	1.47903	2.7876	0.000536434	0.0105658	4.69988	3.22086	11.579	8.97768	5.83067	7.81374	22.7963	29.4947	20.3815	28.4071
ENSG00000223573.6_3	TINCR	chr19:5558178-5568045	-	protein_coding	1.47788	2.78539	0.0138087	0.057547	1.65037	0.172486	0.115548	0.179681	0.140285	0.0750471	4.03014	0.435551	1.72331	3.93791
ENSG00000142700.11_2	DMRTA2	chr1:50883222-50889172	-	protein_coding	1.47646	2.78265	0.041086	0.113494	1.50781	0.0313537	0	0.0908213	0	0	2.52236	5.66751	0	1.78478
ENSG00000185043.10_2	CIB1	chr15:90773207-90777279	-	protein_coding	1.47637	2.78248	0.00923001	0.0452997	4.20695	2.73058	8.34994	5.17126	4.72536	4.87433	10.7688	35.5391	13.6528	17.4612
ENSG00000185803.8_2	SLC52A2	chr8:145577795-145584932	+	protein_coding	1.4756	2.78099	5.64643e-05	0.00503952	2.02616	0.550556	0.54103	0.485659	0.357364	0.480844	4.4184	2.46831	2.89826	2.75729
ENSG00000109079.9_2	TNFAIP1	chr17:26662628-26674035	+	protein_coding	1.4745	2.77887	0.0161706	0.063299	3.77292	2.29842	4.39364	7.08032	5.25255	1.14884	10.5753	10.9786	17.7335	12.4428
ENSG00000213965.3_2	NUDT19	chr19:33182867-33204702	+	protein_coding	1.47417	2.77823	0.00558753	0.0341774	2.79205	1.31789	1.83834	1.72168	1.0067	1.49178	6.92005	10.7083	2.88923	5.38087
ENSG00000185262.8_2	UBALD2	chr17:74261283-74267380	+	protein_coding	1.47367	2.77727	0.00969738	0.0466615	3.43958	1.96591	7.59017	1.74064	2.22353	2.06906	9.27736	11.5193	8.19602	10.7112
ENSG00000155561.14_3	NUP205	chr7:135242667-135333505	+	protein_coding	1.47161	2.77331	6.12258e-05	0.00515164	4.02496	2.55335	4.21214	5.35533	5.14871	4.82915	19.6061	12.8189	16.3432	13.2213
ENSG00000147536.11_2	GINS4	chr8:41386725-41402565	+	protein_coding	1.46989	2.77	0.0031489	0.0252533	1.74798	0.278096	0.49234	0.186446	0.125849	0.0845886	1.66465	3.64455	1.14045	3.80498
ENSG00000162849.15_3	KIF26B	chr1:245318287-245872733	+	protein_coding	1.4698	2.76984	0.0454383	0.121005	1.75145	0.281643	0.117518	0.354904	0.249509	0.154063	7.94207	1.55752	3.2232	0.330618
ENSG00000159259.7_3	CHAF1B	chr21:37757676-37791313	+	protein_coding	1.46942	2.76911	0.00769725	0.0409652	2.00566	0.53624	0.605075	0.501755	0.230046	0.4917	1.71253	5.97288	1.5259	4.44323
ENSG00000156017.12_3	CARNMT1	chr9:77595936-77643339	-	protein_coding	1.46934	2.76896	0.000223157	0.0077413	3.64562	2.17628	3.85248	3.77602	3.19706	3.29067	11.2215	16.1126	11.5745	8.32894
ENSG00000075643.5_3	MOCOS	chr18:33767482-33852120	+	protein_coding	1.46784	2.76607	0.0165368	0.0640932	1.80682	0.338982	0.293444	0.465019	0.246706	0.0834773	1.01355	7.18326	1.68264	2.38981
ENSG00000152939.14_3	MARVELD2	chr5:68710939-68740157	+	protein_coding	1.46715	2.76476	0.000847995	0.0131162	1.76885	0.3017	0.260357	0.435306	0.162446	0.0976701	2.27036	4.26706	1.53998	2.0826
ENSG00000172167.7_3	MTBP	chr8:121457640-121554373	+	protein_coding	1.46715	2.76475	5.13418e-06	0.00254093	2.05518	0.588035	0.676302	0.531781	0.413296	0.406964	2.71647	3.72102	2.93254	3.32361
ENSG00000164733.20_3	CTSB	chr8:11700033-11726957	-	protein_coding	1.46579	2.76214	0.00476173	0.0312079	6.77323	5.30745	45.7547	38.8969	34.235	36.4167	67.4477	174.065	144.751	80.9623
ENSG00000167977.8_3	KCTD5	chr16:2732476-2759031	+	protein_coding	1.46537	2.76135	3.16065e-05	0.00419	2.82844	1.36306	1.63131	1.55018	1.43741	1.67684	7.168	4.62966	5.78009	7.16483
ENSG00000102575.10_2	ACP5	chr19:11685475-11689823	-	protein_coding	1.46522	2.76105	0.0091416	0.0451166	2.08347	0.618248	1.16449	0.356883	0.353244	0.396917	4.33534	1.46206	2.3441	6.34518
ENSG00000065600.12_3	TMEM206	chr1:212537273-212588243	-	protein_coding	1.46495	2.76054	0.00622324	0.0362967	2.46419	0.999243	1.66393	0.905883	0.894053	0.660342	2.52496	9.23042	3.70931	4.45982
ENSG00000138182.14_2	KIF20B	chr10:91461367-91534696	+	protein_coding	1.46458	2.75983	0.00232477	0.021872	4.11148	2.6469	4.80627	5.95582	4.92778	5.4276	11.0471	24.2555	11.5913	22.3026
ENSG00000087086.14_3	FTL	chr19:49468558-49470135	+	protein_coding	1.46372	2.75819	0.027337	0.0880514	8.55626	7.09254	356.715	92.9965	107.608	94.0065	348.077	518.903	403.921	272.24
ENSG00000005893.15_2	LAMP2	chrX:119561682-119603220	-	protein_coding	1.46362	2.75799	0.00275316	0.0238121	4.96108	3.49746	18.8791	9.33044	7.76833	8.03504	26.0377	27.614	30.3149	37.854
ENSG00000156509.13_2	FBXO43	chr8:101145588-101158028	-	protein_coding	1.46339	2.75756	0.0369941	0.106257	1.56578	0.10239	0.098036	0.101136	0.075857	0.0211207	0.415368	4.59544	0.672796	4.79755
ENSG00000167702.11_2	KIFC2	chr8:145691426-145699585	+	protein_coding	1.46214	2.75517	0.00590448	0.0352603	2.63563	1.17349	1.54512	1.51792	1.07803	0.943652	8.6541	2.68056	7.76517	3.78883
ENSG00000091490.10_3	SEL1L3	chr4:25749049-25865382	-	protein_coding	1.46159	2.75411	0.00468818	0.0308978	3.11954	1.65795	2.40864	2.74094	2.1292	1.48532	4.43174	12.8106	5.85668	10.0926
ENSG00000132436.11_4	FIGNL1	chr7:50511826-50610233	-	protein_coding	1.46082	2.75265	0.00670578	0.0378421	3.03422	1.57339	2.16963	2.43549	1.72259	1.64591	4.74269	14.7966	4.63423	7.81144
ENSG00000168411.13_3	RFWD3	chr16:74655292-74700779	-	protein_coding	1.4602	2.75146	0.000109265	0.0059213	2.75935	1.29915	1.80818	1.67354	1.23293	1.18751	5.45768	4.83515	5.25762	7.91354
ENSG00000107798.17_3	LIPA	chr10:90973326-91174314	-	protein_coding	1.45962	2.75035	0.0137666	0.0574392	3.20625	1.74663	5.89281	1.19087	1.62319	2.20118	12.1213	5.28082	8.13104	8.6426
ENSG00000103044.10_2	HAS3	chr16:69139467-69152622	+	protein_coding	1.45903	2.74924	0.0409821	0.113308	1.71622	0.257181	0.284113	0.212622	0.121752	0.168021	2.69432	0.362667	1.625	7.82014
ENSG00000136868.10_2	SLC31A1	chr9:115983842-116026772	+	protein_coding	1.45813	2.74753	0.000185414	0.0072025	3.15455	1.69641	3.18763	2.31417	1.60221	2.05492	9.74813	8.17832	6.51826	7.47695
ENSG00000163218.14_2	PGLYRP4	chr1:153302596-153321316	-	protein_coding	1.45735	2.74604	0.0251542	0.0836543	1.45735	0	0	0	0	0	1.97397	0.154677	5.09935	1.71486
ENSG00000149636.15_4	DSN1	chr20:35380194-35402221	-	protein_coding	1.45725	2.74584	0.00236831	0.0220428	3.20167	1.74442	2.75244	1.71877	1.73248	3.52113	7.41265	12.5916	5.40601	8.7814
ENSG00000163202.4_2	LCE3D	chr1:152551857-152552980	-	protein_coding	1.45715	2.74566	0.0261632	0.0857177	1.45715	0	0	0	0	0	2.17195	0	3.48586	2.99405
ENSG00000186007.9_3	LEMD1	chr1:205350506-205426219	-	protein_coding	1.45713	2.74561	0.0137702	0.0574398	1.5091	0.0519707	0.0445236	0.0726641	0.010833	0.019806	0.561328	0.91629	3.26005	4.14951
ENSG00000157227.12_2	MMP14	chr14:23305766-23318236	+	protein_coding	1.45603	2.74352	0.00367314	0.0273408	6.10301	4.64698	30.0122	27.4007	20.241	20.0614	108.926	51.572	80.3694	46.4728
ENSG00000114686.8_3	MRPL3	chr3:131181056-131221827	-	protein_coding	1.45544	2.74241	2.37737e-06	0.00208414	4.32989	2.87444	6.11259	6.38969	6.25495	6.58382	17.7347	22.7403	18.6963	17.6718
ENSG00000006625.17_3	GGCT	chr7:30536237-30544460	-	protein_coding	1.45403	2.73973	0.00220153	0.0212589	4.95233	3.4983	11.161	7.21256	10.4684	13.2372	33.0145	33.184	18.4825	39.5577
ENSG00000157778.8_2	PSMG3	chr7:1606966-1610641	-	protein_coding	1.45277	2.73733	0.000665247	0.011804	3.05781	1.60504	2.74051	2.43653	1.13127	2.12586	8.43685	7.01592	5.46466	8.83202
ENSG00000111432.4_2	FZD10	chr12:130647004-130650285	+	protein_coding	1.45001	2.73211	0.0383179	0.108961	1.75225	0.302239	0.151414	0.312113	0.247554	0.226508	3.74532	0.451529	7.05518	1.32143
ENSG00000203814.6_3	HIST2H2BF	chr1:149754245-149783928	-	protein_coding	1.44883	2.72987	0.00144399	0.0172041	3.326	1.87716	2.80812	2.50086	2.39422	3.02444	7.10637	15.8135	6.87809	8.41878
ENSG00000158623.14_1	COPG2	chr7:130146079-130353588	-	protein_coding	1.44796	2.72823	0.00427045	0.0295003	3.32223	1.87427	3.41277	2.24829	2.07288	3.10141	16.8411	5.71873	7.70909	8.58705
ENSG00000234912.11_3	SNHG20	chr17:75082798-75091072	+	processed_transcript	1.44786	2.72803	0.0129208	0.0553308	3.30817	1.86031	5.55065	1.90028	1.83336	2.22857	14.7354	10.4771	4.8781	8.06739
ENSG00000111684.10_2	LPCAT3	chr12:7085348-7125814	-	protein_coding	1.4477	2.72772	0.000101251	0.00582129	2.15065	0.702953	1.12412	0.412602	0.571183	0.489412	3.70136	2.68028	3.72412	3.75571
ENSG00000159131.16_4	GART	chr21:34876238-34915797	-	protein_coding	1.44551	2.7236	0.000103808	0.00582129	3.36701	1.9215	3.11678	3.00424	2.84303	2.25058	7.31583	12.3003	9.49501	8.7619
ENSG00000120471.15_2	TP53AIP1	chr11:128804626-128813294	-	protein_coding	1.44495	2.72254	0.0124138	0.0540703	1.48435	0.0393997	0.0291425	0	0.00988948	0.0732295	2.72345	0.195762	2.61915	2.80315
ENSG00000167608.11_2	TMC4	chr19:54663846-54676944	-	protein_coding	1.44371	2.72019	0.000414418	0.00966903	1.98572	0.54201	0.598403	0.610284	0.622579	0.0760941	3.58174	3.11129	1.95203	3.42502
ENSG00000038210.12_3	PI4K2B	chr4:25235597-25280714	+	protein_coding	1.44357	2.71993	0.000630729	0.0115266	3.62443	2.18086	4.48159	4.42866	2.94223	2.60313	10.0302	8.58324	14.1557	13.4404
ENSG00000131153.8_3	GINS2	chr16:85709804-85723679	-	protein_coding	1.44182	2.71663	0.000147018	0.00668791	1.74856	0.306739	0.31389	0.277945	0.102955	0.263926	1.87182	2.85035	1.70046	3.2695
ENSG00000259447.1_4	AC013652.2	chr15:39592619-39602983	-	lincRNA	1.4415	2.71602	0.000729899	0.0122802	1.54006	0.0985667	0	0.113118	0.180714	0	2.40769	1.07667	3.08048	1.47674
ENSG00000269940.1_4	AL049840.3	chr14:104160897-104161507	+	sense_intronic	1.44021	2.7136	0.00240386	0.0221947	3.10018	1.65997	4.48027	1.71264	1.28423	1.93679	8.30216	7.34434	6.40638	8.40611
ENSG00000225932.3_3	CTAGE4	chr7:143880559-143883146	+	protein_coding	1.43774	2.70897	0.00329138	0.0258402	2.40135	0.963604	0.692565	1.62671	0.577827	1.06195	2.55919	3.29748	6.29475	5.9813
ENSG00000100033.16_3	PRODH	chr22:18900290-18924066	-	protein_coding	1.43753	2.70856	0.00308268	0.0250197	1.7538	0.316276	0.499941	0.186474	0.231547	0.0966066	5.06114	1.73646	1.59273	2.00807
ENSG00000256714.1_4	AC087318.1	chr12:22548022-22551009	-	lincRNA	1.43718	2.70791	0.0273544	0.088078	1.50089	0.0637105	0	0.193205	0	0	1.17435	0.377281	5.90916	2.10081
ENSG00000185624.14_2	P4HB	chr17:79801035-79818570	-	protein_coding	1.43668	2.70697	0.000210002	0.00760891	5.73834	4.30166	23.1534	22.0847	15.2527	15.6911	53.9383	62.196	44.376	50.5535
ENSG00000150753.11_3	CCT5	chr5:10250033-10266524	+	protein_coding	1.43637	2.70639	5.81647e-05	0.0050849	5.33304	3.89667	13.9437	15.7099	14.4093	11.7891	35.1745	49.5205	40.0554	34.1865
ENSG00000255717.6_2	SNHG1	chr11:62619460-62623386	-	processed_transcript	1.43585	2.70541	0.000108426	0.0059213	2.43617	1.00032	1.5219	1.26676	0.67932	0.668168	5.0247	4.24904	4.19035	4.22667
ENSG00000181626.11_2	ANKRD62	chr18:12093852-12129748	+	protein_coding	1.43383	2.70163	0.0194516	0.0710175	1.60565	0.171819	0.163526	0.173202	0.069974	0.102473	0.440864	1.62442	5.5112	2.484
ENSG00000253161.5_3	LINC01605	chr8:37278859-37411701	-	lincRNA	1.43268	2.69947	0.00551638	0.033965	1.55047	0.117793	0	0.28699	0.0771147	0	2.12702	3.94994	1.90906	0.634808
ENSG00000144452.14_3	ABCA12	chr2:215796266-216003151	-	protein_coding	1.43236	2.69887	0.00719034	0.0392907	1.48274	0.0503839	0	0.137897	0.010568	0	3.42063	2.15286	0.386826	2.15635
ENSG00000213024.11_3	NUP62	chr19:50410082-50433020	-	protein_coding	1.43161	2.69747	0.00018325	0.0072025	3.22574	1.79413	2.65267	3.01922	1.54509	2.87161	8.94688	9.20782	6.80044	8.67019
ENSG00000153404.14_3	PLEKHG4B	chr5:92266-190087	+	protein_coding	1.42954	2.69361	0.00168448	0.0186301	1.61301	0.183471	0.0123684	0.462607	0.0916171	0.0289268	3.97283	1.65783	1.49457	1.65543
ENSG00000164855.15_2	TMEM184A	chr7:1581871-1600457	-	protein_coding	1.4295	2.69353	0.016769	0.0646782	1.61848	0.188986	0.131597	0.283562	0.0782976	0.0782387	2.83167	1.84643	0.403821	4.80563
ENSG00000143590.13_3	EFNA3	chr1:155051348-155060014	+	protein_coding	1.4284	2.69147	0.000303519	0.00864242	1.67986	0.251467	0.109311	0.322398	0.101267	0.243049	2.06555	2.17211	3.46204	1.42866
ENSG00000175643.8_2	RMI2	chr16:11343476-11445619	+	protein_coding	1.42803	2.69079	0.000462101	0.0100012	1.64104	0.213005	0.263899	0.212212	0	0.178128	2.46094	1.28614	1.80521	3.26326
ENSG00000281406.1_3	BLACAT1	chr1:205404014-205407007	-	lincRNA	1.42773	2.69023	0.00114238	0.0153219	1.46804	0.0403096	0	0.102778	0	0.014027	1.18536	1.37252	1.47633	3.56196
ENSG00000132849.19_3	PATJ	chr1:62208149-62644347	+	protein_coding	1.42728	2.68939	0.00712484	0.0391306	4.5742	3.14693	3.53963	9.71064	9.80437	10.7177	18.9601	28.4166	26.738	18.7724
ENSG00000135540.11_4	NHSL1	chr6:138743180-139013708	-	protein_coding	1.42725	2.68934	0.00106916	0.0148577	3.72536	2.29811	4.53844	5.95167	3.19227	2.62467	11.8337	9.84818	15.4086	12.3968
ENSG00000224271.5_3	AL117329.1	chr22:48027423-48251349	+	lincRNA	1.42635	2.68766	0.00168466	0.0186301	1.46316	0.0368079	0	0.107442	0	0	0.833541	1.63166	3.44142	1.69636
ENSG00000143924.18_2	EML4	chr2:42396490-42559688	+	protein_coding	1.42542	2.68593	0.000109664	0.0059213	3.9338	2.50838	5.50488	4.7808	4.49296	4.07407	12.7389	15.1729	11.5508	18.5593
ENSG00000198498.9_3	TMA16	chr4:164415594-164441691	+	protein_coding	1.42459	2.68438	0.000242337	0.00797396	2.92475	1.50016	1.63324	2.00246	1.571	2.14993	8.73064	6.36956	4.58037	7.30809
ENSG00000250564.1_3	AC109454.3	chr5:133764742-133796306	-	lincRNA	1.42415	2.68356	0.0189163	0.0697859	1.42415	0	0	0	0	0	0.291119	1.55285	4.87414	1.6786
ENSG00000167513.8_3	CDT1	chr16:88869621-88875666	+	protein_coding	1.42326	2.68191	0.00118301	0.0155613	1.58868	0.165423	0.0563552	0.345148	0.0596564	0.0506143	2.07205	2.77683	0.901293	2.70986
ENSG00000156876.9_3	SASS6	chr1:100549119-100598511	-	protein_coding	1.4217	2.67901	0.0031527	0.0252657	2.64189	1.22019	1.10329	1.64392	1.3726	1.23299	6.19282	9.09988	2.95708	4.27914
ENSG00000130701.3_2	RBBP8NL	chr20:60985293-61002589	-	protein_coding	1.4197	2.6753	6.61186e-05	0.00519089	1.54406	0.124365	0.023885	0.332442	0.034788	0	2.6086	1.90587	1.62754	1.62467
ENSG00000060140.8_3	STYK1	chr12:10771538-10826917	-	protein_coding	1.4191	2.67419	0.00580374	0.034942	1.71733	0.298227	0.310559	0.393735	0.114485	0.123027	1.60183	3.79395	0.936909	3.83932
ENSG00000185900.9_2	POMK	chr8:42948649-42978577	+	protein_coding	1.41788	2.67193	0.000807449	0.012951	3.13484	1.71696	2.96612	2.59948	1.89791	1.82313	6.0923	10.2636	5.8261	9.91653
ENSG00000235499.1_3	AC073046.1	chr2:74212259-74213470	+	lincRNA	1.41778	2.67175	0.0307737	0.0945828	3.03987	1.62209	7.05288	1.70738	1.57383	0.599976	6.56583	6.21019	9.10153	7.30201
ENSG00000198918.7_2	RPL39	chrX:118920467-118925606	-	protein_coding	1.41747	2.67117	0.00640747	0.0368932	6.24361	4.82614	54.9856	22.2116	19.1098	23.7775	72.3072	77.8045	63.5217	87.4399
ENSG00000131626.16_3	PPFIA1	chr11:70116806-70230509	+	protein_coding	1.41714	2.67055	0.0271535	0.0876708	4.91992	3.50278	9.40659	10.3108	11.771	9.98341	13.9494	18.4793	53.0772	52.3282
ENSG00000108439.10_4	PNPO	chr17:46018872-46026674	+	protein_coding	1.41587	2.66821	0.00159672	0.0181815	2.25619	0.840321	1.05184	0.852507	0.495169	0.808229	2.85319	6.87699	3.06174	3.22505
ENSG00000136603.13_3	SKIL	chr3:170075466-170114623	+	protein_coding	1.41531	2.66716	0.0185812	0.0689592	5.12195	3.70664	25.8095	8.64145	10.5713	8.7146	28.7325	42.3673	50.022	21.3504
ENSG00000164951.15_3	PDP1	chr8:94870035-94938294	+	protein_coding	1.41515	2.66688	0.00469137	0.0309097	3.5697	2.15454	4.82363	2.59525	3.33469	3.3296	16.6816	13.4522	5.97743	10.1479
ENSG00000155189.11_2	AGPAT5	chr8:6565878-6617187	+	protein_coding	1.41509	2.66677	0.00744741	0.0401435	3.29522	1.88013	2.23307	3.42682	2.4689	2.69829	9.86062	17.1703	6.83594	5.00525
ENSG00000224961.1_3	LINC01752	chr20:10733738-10734614	+	lincRNA	1.41493	2.66648	0.0191364	0.0703542	1.64713	0.232192	0.485277	0	0	0.281679	1.84563	6.33297	1.31335	0.993595
ENSG00000100625.8_3	SIX4	chr14:61176246-61191066	-	protein_coding	1.41388	2.66452	0.0258346	0.0850822	2.03798	0.624102	0.80444	0.659316	0.305832	0.443226	5.19714	7.21441	1.51908	1.218
ENSG00000245694.9_3	CRNDE	chr16:54879101-54963101	-	lincRNA	1.41298	2.66287	0.000254779	0.00814223	1.52058	0.107594	0.0848255	0.186031	0.00842466	0.03862	1.17558	1.50466	2.53103	2.52155
ENSG00000173207.12_2	CKS1B	chr1:154947129-154951725	+	protein_coding	1.41093	2.65909	0.003114	0.0251154	2.14647	0.735537	1.33607	0.561564	0.552907	0.356701	2.5593	5.95816	2.30871	3.68907
ENSG00000012048.20_3	BRCA1	chr17:41196312-41322262	-	protein_coding	1.41086	2.65896	0.00350593	0.0267288	2.47119	1.06033	0.988152	1.03811	0.681332	1.77611	3.8811	7.93485	2.74448	4.78919
ENSG00000135476.11_3	ESPL1	chr12:53662083-53687427	+	protein_coding	1.40932	2.65612	0.0100094	0.047629	1.56473	0.155411	0.149485	0.254467	0.0471596	0.0189611	1.43354	3.04992	0.567526	3.95705
ENSG00000263786.1_4	AC022211.1	chr17:73141356-73142641	-	sense_intronic	1.4091	2.65572	0.00396122	0.028326	1.72791	0.318808	0.636466	0.215466	0.163081	0.046222	2.56243	4.29448	2.06587	1.08203
ENSG00000004864.13_2	SLC25A13	chr7:95749532-95951459	-	protein_coding	1.40902	2.65557	0.00343562	0.0264347	3.49433	2.08531	4.91989	3.57029	2.19574	2.75088	11.4867	15.4544	9.26975	6.64364
ENSG00000128534.7_3	LSM8	chr7:117824086-117832878	+	protein_coding	1.40871	2.65499	0.000362792	0.00911052	3.31835	1.90964	3.39767	2.79056	2.18002	2.7591	10.5898	9.00649	6.13495	10.9659
ENSG00000153214.9_3	TMEM87B	chr2:112812800-112876895	+	protein_coding	1.40774	2.65322	0.000487719	0.0101608	4.18499	2.77725	5.64062	8.26926	4.11224	6.019	16.8663	21.1467	16.9667	14.3965
ENSG00000164283.12_3	ESM1	chr5:54273692-54318499	-	protein_coding	1.40741	2.6526	0.0125714	0.0543945	1.7084	0.300996	0.434153	0.16221	0.21128	0.141067	2.878	5.55112	1.19366	1.04659
ENSG00000136830.11_2	FAM129B	chr9:130267618-130341268	-	protein_coding	1.40636	2.65068	0.0114366	0.0514863	4.92931	3.52295	19.0762	15.3209	6.20567	6.39523	29.5026	26.9937	27.398	34.5465
ENSG00000004059.10_4	ARF5	chr7:127228399-127231759	+	protein_coding	1.40461	2.64745	0.00268623	0.0235179	3.3758	1.97119	4.25618	2.69316	2.24354	2.75375	14.2516	6.03455	11.0909	7.95072
ENSG00000105372.6_3	RPS19	chr19:42363988-42376994	+	protein_coding	1.40415	2.64661	0.000523022	0.0104597	5.61423	4.21008	24.1264	15.1699	15.1612	16.8702	47.6933	62.8864	38.4265	45.9391
ENSG00000144554.10_2	FANCD2	chr3:10068098-10143614	+	protein_coding	1.40411	2.64654	0.00161998	0.0183038	1.90797	0.503864	0.788675	0.558883	0.197065	0.211294	1.98049	4.20049	1.84408	3.49939
ENSG00000069956.11_3	MAPK6	chr15:52244303-52359569	+	protein_coding	1.40396	2.64627	0.000437902	0.00991707	5.03192	3.62796	14.6503	10.452	12.2968	8.80267	28.1759	37.7515	37.4276	25.3681
ENSG00000118705.16_3	RPN2	chr20:35806813-35870026	+	protein_coding	1.40368	2.64576	0.00112968	0.0152821	5.5376	4.13392	21.1031	17.7552	13.2385	15.0953	40.4624	63.1212	32.9371	50.5952
ENSG00000141429.13_3	GALNT1	chr18:33161081-33291798	+	protein_coding	1.40312	2.64472	0.00108501	0.0149859	4.64525	3.24213	9.52148	9.34566	7.99644	7.1848	29.8483	30.5986	15.2064	23.8227
ENSG00000154914.16_4	USP43	chr17:9548015-9633008	+	protein_coding	1.40284	2.64422	0.000582095	0.0110826	1.47039	0.0675497	0.0225634	0.117836	0.0380129	0.0164045	1.76618	2.10929	2.6887	0.858288
ENSG00000085733.15_2	CTTN	chr11:70244510-70282690	+	protein_coding	1.40199	2.64266	0.0434154	0.117548	6.16945	4.76746	20.8796	31.8137	28.2309	25.2213	37.1281	37.2265	156.29	116.07
ENSG00000165025.14_2	SYK	chr9:93564069-93660831	+	protein_coding	1.40158	2.6419	0.00983105	0.0471054	4.55424	3.15266	16.0909	9.36818	4.4811	5.43944	24.9413	20.0616	24.0585	21.2541
ENSG00000164086.9_3	DUSP7	chr3:52082935-52090566	-	protein_coding	1.40054	2.64001	0.000154577	0.00682235	2.48895	1.0884	1.68289	1.41593	0.691494	0.864697	4.02274	4.72307	5.11706	4.64776
ENSG00000153066.12_3	TXNDC11	chr16:11772936-11836734	-	protein_coding	1.40015	2.63929	0.0127485	0.0549397	3.03328	1.63313	5.4355	1.6356	1.02208	1.69916	6.59287	6.08979	6.24024	10.5251
ENSG00000203724.10_2	C1orf53	chr1:197871777-197876497	+	protein_coding	1.3997	2.63847	0.0200773	0.0724873	1.78623	0.386522	0.640763	0.231173	0.289744	0.120858	1.91193	6.76088	0.862302	2.3627
ENSG00000268621.5_2	IGFL2-AS1	chr19:46692423-46706340	-	lincRNA	1.39922	2.63758	0.00330655	0.0259048	1.49495	0.0957321	0	0.182914	0.0719181	0.0283906	3.9056	1.22056	1.93895	0.971293
ENSG00000164430.15_3	MB21D1	chr6:74123238-74161999	-	protein_coding	1.39879	2.6368	0.00934059	0.0456622	2.82271	1.42392	2.92394	1.37328	1.74454	1.02782	3.12379	9.24858	5.06282	8.77793
ENSG00000115163.14_3	CENPA	chr2:26987157-27023935	+	protein_coding	1.39773	2.63487	0.000823665	0.0130393	1.6398	0.242068	0.376094	0.138324	0.197921	0.0426469	2.40765	3.51445	1.57387	1.38161
ENSG00000213741.9_3	RPS29	chr14:50037702-50065882	-	protein_coding	1.39605	2.63181	0.00286844	0.0242743	4.27341	2.87735	11.0456	4.88515	4.23076	6.86194	19.5164	21.7635	15.101	17.5995
ENSG00000115902.10_2	SLC1A4	chr2:65215611-65250999	+	protein_coding	1.39564	2.63106	0.000196535	0.00739141	2.65237	1.25672	1.47789	1.63071	1.27903	1.19453	4.67681	3.81736	6.90775	6.22443
ENSG00000163293.11_3	NIPAL1	chr4:47916159-48042190	+	protein_coding	1.39527	2.63039	0.00373501	0.0275333	1.73588	0.340609	0.167745	0.885792	0.103666	0.0579235	1.27554	2.5994	2.0363	3.9494
ENSG00000259153.1_3	AC004816.1	chr14:71276922-71282120	+	lincRNA	1.39488	2.62967	0.0168114	0.0647427	1.99497	0.600084	0.142165	1.1876	0.493642	0.414589	4.29331	2.48412	1.03643	5.72183
ENSG00000186197.13_3	EDARADD	chr1:236511557-236648214	+	protein_coding	1.39339	2.62694	0.0150775	0.0605997	1.87677	0.483385	0.244412	0.544104	0.585216	0.254079	4.50838	1.76756	0.924957	5.19891
ENSG00000145088.8_2	EAF2	chr3:121554030-121605373	+	protein_coding	1.39278	2.62584	0.000845852	0.0131162	2.06426	0.671478	1.29013	0.579776	0.21678	0.461749	3.34028	2.50273	2.88674	4.17733
ENSG00000276434.1_4	AL136221.1	chr13:113993765-113994273	-	sense_intronic	1.39275	2.62579	0.000852252	0.013133	2.29503	0.902274	0.985448	1.18928	0.50618	0.863844	4.57637	5.37753	2.39535	3.80396
ENSG00000088035.15_2	ALG6	chr1:63833261-63904233	+	protein_coding	1.39255	2.62542	6.15351e-05	0.00515164	2.50396	1.11141	1.36077	1.21087	0.885887	1.2138	4.55183	6.21046	3.84088	4.34251
ENSG00000073350.13_2	LLGL2	chr17:73521161-73571289	+	protein_coding	1.39227	2.62491	0.00324206	0.0256964	2.02512	0.632854	0.614069	0.920257	0.393271	0.338797	4.37625	4.45127	1.46149	2.80465
ENSG00000140022.9_3	STON2	chr14:81727000-81902809	-	protein_coding	1.39187	2.62419	0.011971	0.0530261	3.08966	1.69779	4.509	2.27423	1.47488	1.48086	8.82185	6.56336	12.3134	4.31039
ENSG00000146757.13_2	ZNF92	chr7:64838712-64866048	+	protein_coding	1.38962	2.6201	0.000359595	0.00911052	3.19815	1.80853	2.81322	3.30452	1.72071	2.37123	6.47122	10.2935	7.44415	8.95829
ENSG00000106367.13_3	AP1S1	chr7:100797678-100804877	+	protein_coding	1.38857	2.61819	9.29534e-05	0.00562156	3.37693	1.98836	2.46003	3.05161	3.31861	3.09418	11.7359	10.6156	7.76913	7.97832
ENSG00000007306.14_2	CEACAM7	chr19:42177235-42210895	-	protein_coding	1.38847	2.61801	0.0339891	0.100583	1.57206	0.183588	0.231567	0.271393	0.0624881	0	2.74361	2.77853	0.0744436	4.1422
ENSG00000125731.12_3	SH2D3A	chr19:6752171-6767599	-	protein_coding	1.38831	2.61772	0.00882173	0.0442224	1.76095	0.372641	0.823399	0.361106	0.100283	0.029025	1.93843	4.03164	0.958467	3.55673
ENSG00000136026.13_3	CKAP4	chr12:106631655-106698057	-	protein_coding	1.38751	2.61627	0.0353529	0.103172	4.82236	3.43485	25.4001	8.93639	5.42147	7.11902	21.2506	35.6155	18.9011	38.5202
ENSG00000242372.6_3	EIF6	chr20:33866710-33872788	-	protein_coding	1.38741	2.61609	5.9133e-08	0.000669868	3.68023	2.29282	3.74829	3.94504	3.84006	4.07303	11.5775	12.6024	11.045	12.1043
ENSG00000181467.4_3	RAP2B	chr3:152880059-152888409	+	protein_coding	1.38547	2.61257	0.00201294	0.0202987	4.20428	2.81882	9.71497	6.64383	4.71403	4.29601	15.0264	16.2719	23.163	16.2638
ENSG00000178074.5_3	C2orf69	chr2:200775979-200820658	+	protein_coding	1.38546	2.61256	0.00506176	0.0323684	3.62019	2.23472	4.90673	3.73636	2.64741	3.8095	8.37219	14.8277	17.7754	7.20903
ENSG00000158714.10_3	SLAMF8	chr1:159796540-159807039	+	protein_coding	1.38535	2.61236	0.00975992	0.0469026	1.70024	0.314891	0.45879	0.251301	0.135649	0.154963	2.27459	0.599836	3.31277	3.93524
ENSG00000075673.11_2	ATP12A	chr13:25254549-25286631	+	protein_coding	1.38494	2.61162	0.0100556	0.0477246	1.40033	0.0153815	0	0.0210805	0.0220243	0	2.54875	0.405135	3.49038	1.16812
ENSG00000077348.8_2	EXOSC5	chr19:41892279-41903384	-	protein_coding	1.38484	2.61144	8.6298e-06	0.00271703	2.41435	1.0295	1.05335	1.40781	0.810106	0.940246	4.66087	3.91771	4.58197	4.19673
ENSG00000122966.15_4	CIT	chr12:120123595-120315095	-	protein_coding	1.38477	2.6113	0.000990259	0.0143022	3.18022	1.79545	2.49958	2.84969	2.37615	2.19207	5.2586	11.9906	7.1508	9.18722
ENSG00000107833.10_2	NPM3	chr10:103541082-103543170	-	protein_coding	1.3844	2.61063	0.000510655	0.0103966	3.59786	2.21346	3.62098	4.89856	2.97788	3.26715	12.9414	14.2559	8.34019	9.81814
ENSG00000188483.7_2	IER5L	chr9:131937831-131940541	-	protein_coding	1.38436	2.61057	0.0274612	0.0882567	2.79542	1.41105	3.99755	1.39964	1.2057	0.890727	7.83101	7.05179	8.89133	2.30263
ENSG00000281398.2_3	SNHG4	chr5:138609791-138618933	+	processed_transcript	1.38403	2.60996	1.84908e-05	0.00339125	1.68906	0.305037	0.235788	0.275082	0.218785	0.213088	2.78561	1.94481	2.56335	1.72134
ENSG00000116489.12_2	CAPZA1	chr1:113161795-113214241	+	protein_coding	1.38389	2.60971	0.018634	0.0690862	4.85082	3.46693	24.9072	8.79722	6.17027	7.21372	24.7024	34.4758	25.4416	27.7591
ENSG00000159202.17_2	UBE2Z	chr17:46985731-47006418	+	protein_coding	1.38358	2.60916	0.000120346	0.00609218	2.40271	1.01913	1.57862	1.04846	0.778799	0.795615	3.85969	3.74513	5.36155	4.33009
ENSG00000078900.14_3	TP73	chr1:3569084-3652765	+	protein_coding	1.38349	2.60899	0.00136678	0.0167399	1.40784	0.024345	0.0170231	0	0.0204106	0.030881	1.88764	0.971898	1.09847	3.14834
ENSG00000143493.12_3	INTS7	chr1:212113741-212208884	-	protein_coding	1.38234	2.60691	0.0022496	0.021529	2.65493	1.27259	1.58232	1.51377	1.28908	1.29275	4.07945	8.95781	3.32906	6.18594
ENSG00000166451.13_3	CENPN	chr16:81040103-81066719	+	protein_coding	1.38227	2.60679	0.000221118	0.00771842	1.96519	0.582918	0.401926	0.878851	0.373352	0.391565	3.21073	2.53799	2.18389	3.90065
ENSG00000228107.1_4	AP000692.1	chr21:37732928-37734338	+	sense_overlapping	1.38222	2.6067	0.000360988	0.00911052	2.61148	1.22926	1.08714	1.22698	1.53712	1.56192	4.19171	3.77661	5.97419	7.06523
ENSG00000186638.16_3	KIF24	chr9:34252379-34311369	-	protein_coding	1.38199	2.60627	0.00658119	0.0374122	1.76354	0.38155	0.275722	0.412835	0.242232	0.286417	1.77313	4.84579	0.994748	3.10969
ENSG00000146350.13_3	TBC1D32	chr6:121400640-121655891	-	protein_coding	1.3818	2.60593	8.55546e-05	0.00559742	2.5753	1.1935	1.35924	1.20521	1.68404	0.959324	4.59199	4.68151	4.2854	6.51376
ENSG00000172292.14_3	CERS6	chr2:169312372-169631647	+	protein_coding	1.38147	2.60534	0.000835626	0.0130841	3.54711	2.16563	2.47856	3.60467	4.19597	3.86877	15.0937	11.5434	9.40426	7.88916
ENSG00000125850.10_3	OVOL2	chr20:17937623-18039832	-	protein_coding	1.38132	2.60507	0.000332882	0.00894146	1.55611	0.174789	0.197112	0.316086	0.0305002	0	2.54466	1.51577	2.60409	1.3265
ENSG00000114354.13_3	TFG	chr3:100428175-100467810	+	protein_coding	1.38087	2.60425	2.48888e-05	0.0038406	4.40027	3.0194	8.22332	7.14578	6.28118	6.90125	20.031	24.4648	18.7391	17.8071
ENSG00000078114.18_3	NEBL	chr10:21068902-21463116	-	protein_coding	1.38053	2.60364	0.0177699	0.0671622	2.03308	0.652554	0.731786	1.00028	0.356672	0.299255	4.17581	3.18101	0.886843	5.87199
ENSG00000153044.9_2	CENPH	chr5:68485375-68506184	+	protein_coding	1.38039	2.60339	0.00189562	0.0196983	2.53942	1.15903	1.47598	0.966224	1.1494	1.37641	4.04358	4.6321	3.22938	8.50794
ENSG00000197121.14_2	PGAP1	chr2:197697728-197792520	-	protein_coding	1.38034	2.60329	0.00377344	0.0276837	2.47544	1.0951	1.81586	0.90064	0.765426	1.20433	4.50863	2.83099	8.12203	3.96912
ENSG00000129195.15_3	PIMREG	chr17:6347735-6354789	+	protein_coding	1.37955	2.60187	0.00401245	0.0285102	1.4901	0.110558	0.0807392	0.146864	0.0345368	0.0596096	1.41169	4.20111	1.01194	1.46735
ENSG00000196305.17_3	IARS	chr9:94972489-95056038	-	protein_coding	1.37673	2.59679	0.000388528	0.00939817	4.56557	3.18885	6.74082	8.59575	8.61956	8.67679	24.9237	30.8242	19.9587	17.1836
ENSG00000184678.10_2	HIST2H2BE	chr1:149856009-149858202	-	protein_coding	1.37622	2.59587	0.00393657	0.028231	3.78909	2.41287	5.15805	4.19087	3.17494	5.02637	14.7959	20.6253	7.87017	11.0527
ENSG00000164300.16_2	SERINC5	chr5:79407474-79551898	-	protein_coding	1.37593	2.59535	0.00433571	0.0297698	3.41068	2.03475	5.49133	3.85667	2.07325	1.90943	12.8505	9.126	7.74212	9.43138
ENSG00000176641.10_3	RNF152	chr18:59475296-59561480	-	protein_coding	1.37589	2.59528	0.00836186	0.0429219	2.89585	1.51996	2.8778	1.66857	1.62419	1.49093	13.4099	5.81808	4.65097	4.52728
ENSG00000145247.11_3	OCIAD2	chr4:48887036-48908954	-	protein_coding	1.3758	2.59512	0.0167936	0.0647101	3.55707	2.18127	1.27461	4.76821	4.22771	5.16946	7.60999	15.2219	14.6078	7.80417
ENSG00000185436.11_2	IFNLR1	chr1:24480647-24514449	-	protein_coding	1.3756	2.59475	7.46986e-05	0.00540818	1.81222	0.436623	0.227239	0.616286	0.255113	0.347774	2.77144	3.04491	2.52993	1.82455
ENSG00000176749.8_3	CDK5R1	chr17:30813637-30818274	+	protein_coding	1.37404	2.59196	0.00473476	0.031104	1.63172	0.257674	0.27446	0.244937	0.101267	0.169242	3.22221	0.942037	3.71181	1.38669
ENSG00000129514.5_2	FOXA1	chr14:38059189-38065264	-	protein_coding	1.37267	2.58949	0.0408525	0.113142	1.43166	0.0589885	0	0.0738722	0.0737896	0.0213098	4.86631	2.93074	0.107173	1.07411
ENSG00000182004.12_2	SNRPE	chr1:203830731-203839678	+	protein_coding	1.37214	2.58855	0.00400008	0.0284715	4.96465	3.5925	13.5268	10.785	9.37085	10.926	24.2701	48.4057	19.3343	36.447
ENSG00000156471.12_2	PTDSS1	chr8:97273943-97349223	+	protein_coding	1.37045	2.58551	0.0233413	0.0795209	3.37841	2.00796	3.47991	3.71864	3.34858	1.84698	11.761	20.0217	4.45265	6.99553
ENSG00000273989.1_4	AC022079.1	chr12:28389160-28389761	+	sense_intronic	1.36911	2.58311	0.0130954	0.0557054	2.32436	0.955247	1.34962	0.993509	1.12199	0.42191	2.30589	2.19598	6.57532	6.8616
ENSG00000185875.12_2	THNSL1	chr10:25305587-25315593	+	protein_coding	1.36873	2.58244	0.00795855	0.0416641	2.556	1.18726	1.05002	1.87822	1.07693	1.19432	4.8348	10.1901	3.69945	2.8978
ENSG00000108561.8_3	C1QBP	chr17:5336097-5352150	-	protein_coding	1.36828	2.58163	0.00250484	0.0227459	5.52287	4.15459	15.6258	18.454	15.0888	18.3334	35.9787	76.8059	33.5817	43.9149
ENSG00000076003.4_2	MCM6	chr2:136597196-136633996	-	protein_coding	1.36811	2.58132	0.00295652	0.0245639	4.14495	2.77684	5.79281	5.89831	5.50832	6.23412	14.3098	29.6551	11.2459	16.0432
ENSG00000198796.6_3	ALPK2	chr18:56148479-56296189	-	protein_coding	1.3673	2.57988	0.00876171	0.0440546	1.50493	0.137632	0.0962117	0.211348	0.0229223	0.0782491	1.80382	0.531361	1.96976	4.08828
ENSG00000104689.9_2	TNFRSF10A	chr8:23047965-23082639	-	protein_coding	1.367	2.57934	0.0164338	0.0637824	3.45649	2.08949	5.98534	4.01286	2.71761	1.52032	6.4073	15.9781	12.1111	7.80716
ENSG00000198146.4_3	ZNF770	chr15:35270542-35280488	-	protein_coding	1.36663	2.57867	9.30333e-05	0.00562156	4.68807	3.32145	10.6077	9.58248	7.36518	8.71882	25.7402	29.9675	20.5206	23.7787
ENSG00000206053.12_4	JPT2	chr16:1728257-1752281	+	protein_coding	1.36658	2.57858	5.05055e-05	0.00495641	3.74259	2.37601	3.52994	4.62696	3.94702	4.75826	14.4227	10.2493	13.7753	11.5228
ENSG00000160752.14_2	FDPS	chr1:155278539-155290457	+	protein_coding	1.36653	2.57849	0.00169719	0.0186975	3.72438	2.35786	4.09656	4.1867	3.70253	4.55448	9.24027	19.7394	8.93062	13.4717
ENSG00000171476.21_3	HOPX	chr4:57514154-57548065	-	protein_coding	1.36614	2.57779	0.0389381	0.109971	2.00343	0.637293	0.722252	1.33489	0.15557	0.259558	5.42193	0.933156	1.82862	6.35975
ENSG00000170454.5_2	KRT75	chr12:52817854-52828309	-	protein_coding	1.36509	2.57593	0.00566416	0.0344953	1.39937	0.0342818	0	0.099713	0	0	0.670841	0.939243	3.08337	2.65955
ENSG00000165905.17_3	LARGE2	chr11:45943172-45950647	+	protein_coding	1.36484	2.57547	9.74001e-08	0.000669868	1.41371	0.0488697	0.0553758	0.0850203	0	0	1.47919	1.69209	1.73359	1.76146
ENSG00000176915.14_2	ANKLE2	chr12:133302089-133338474	-	protein_coding	1.36426	2.57444	0.000314854	0.00875546	3.84768	2.48342	4.95369	4.73072	4.33415	4.37378	12.1497	13.6413	19.1113	10.0952
ENSG00000142684.8_3	ZNF593	chr1:26496362-26497364	+	protein_coding	1.36324	2.57263	0.00104374	0.0146946	3.56088	2.19764	5.58311	3.48124	3.03409	2.72092	9.00872	14.0647	9.13154	11.6975
ENSG00000138092.10_2	CENPO	chr2:25016005-25045245	+	protein_coding	1.36273	2.57171	0.000212539	0.00760891	1.84214	0.479408	0.543128	0.600466	0.270615	0.203934	2.1912	2.99464	1.92911	3.42576
ENSG00000187531.13_3	SIRT7	chr17:79869815-79879199	-	protein_coding	1.36259	2.57146	0.00560821	0.0342577	2.41101	1.04842	2.24517	1.2482	0.421205	0.7648	6.92966	3.2176	3.8613	3.92123
ENSG00000090061.17_3	CCNK	chr14:99947506-100001381	+	protein_coding	1.36249	2.57129	0.014728	0.0597317	3.42438	2.06189	4.44249	3.10585	2.69284	2.68301	7.1623	8.1827	6.56361	22.4344
ENSG00000146707.14_4	POMZP3	chr7:76239303-76256578	-	protein_coding	1.36211	2.5706	0.00263628	0.0233333	2.81554	1.45343	1.61757	1.42472	1.17193	3.08035	8.42313	4.11882	6.96166	5.39549
ENSG00000163029.15_2	SMC6	chr2:17845079-17981509	-	protein_coding	1.36181	2.57007	0.000698933	0.0120414	4.72798	3.36617	8.23615	10.6756	10.0832	8.45896	33.2736	31.727	19.2516	20.7138
ENSG00000113645.14_3	WWC1	chr5:167718656-167899308	+	protein_coding	1.36166	2.56981	0.000119915	0.00609218	1.80682	0.445158	0.22917	0.690499	0.228335	0.346109	2.57187	2.86633	1.80119	2.87337
ENSG00000143367.15_3	TUFT1	chr1:151512781-151556059	+	protein_coding	1.361	2.56862	0.00298701	0.0246803	3.98833	2.62734	2.61424	5.78013	6.45973	6.97358	14.9192	12.2886	14.7042	18.0994
ENSG00000169976.6_2	SF3B5	chr6:144416018-144416710	-	protein_coding	1.36072	2.56813	0.000927304	0.0138231	4.42592	3.0652	8.38936	8.00856	5.58175	7.81528	16.464	29.3106	16.3562	22.2353
ENSG00000027869.11_3	SH2D2A	chr1:156776035-156786654	-	protein_coding	1.35992	2.5667	0.0150348	0.0605371	1.71281	0.352899	0.415848	0.243114	0.288954	0.172648	0.478687	4.0809	2.46786	3.43155
ENSG00000141741.11_2	MIEN1	chr17:37884749-37887040	-	protein_coding	1.35967	2.56626	0.00256299	0.0229937	3.26298	1.90331	4.13344	2.74497	1.88541	2.52981	7.58177	10.2355	5.71207	12.1218
ENSG00000101310.14_3	SEC23B	chr20:18488137-18542059	+	protein_coding	1.35912	2.56529	0.00521965	0.0328892	3.15684	1.79772	4.66382	2.57819	1.82375	1.55312	6.07982	10.0304	6.1517	10.3292
ENSG00000174021.10_2	GNG5	chr1:84964008-84972248	-	protein_coding	1.359	2.56507	0.00680731	0.0381842	3.6354	2.27641	6.29648	3.32557	3.15776	3.19807	6.7667	17.04	9.91629	14.5924
ENSG00000118515.11_3	SGK1	chr6:134490384-134639250	-	protein_coding	1.35886	2.56482	0.0327043	0.0980828	3.34564	1.98679	5.68689	3.37421	2.20101	1.63583	10.3544	3.7515	16.5316	10.2912
ENSG00000146842.16_2	TMEM209	chr7:129804555-129847610	-	protein_coding	1.35789	2.56311	0.000194066	0.00736796	2.43224	1.07435	1.05979	1.22186	0.791332	1.39845	6.20969	4.13343	3.93626	3.64504
ENSG00000160949.16_2	TONSL	chr8:145654158-145669827	-	protein_coding	1.35783	2.56299	7.51175e-05	0.00540818	2.04417	0.686345	0.682328	0.68544	0.526758	0.548984	4.37544	2.7155	3.14039	2.49908
ENSG00000120992.17_2	LYPLA1	chr8:54958927-55014577	-	protein_coding	1.35747	2.56236	0.000493711	0.0101947	3.65652	2.29904	3.85767	4.70192	3.62836	3.57562	11.2673	15.2766	7.93212	13.1781
ENSG00000184574.9_2	LPAR5	chr12:6728001-6745613	-	protein_coding	1.35724	2.56194	0.000372303	0.00920499	1.88183	0.524591	0.564262	0.624566	0.277697	0.318851	2.24152	1.88967	3.88749	3.02963
ENSG00000163872.15_3	YEATS2	chr3:183415606-183530413	+	protein_coding	1.35649	2.56062	0.000331737	0.00894146	3.7507	2.39421	3.97386	4.1332	4.17525	4.7796	9.64186	14.4517	16.7906	10.2229
ENSG00000277957.1_3	SENP3-EIF4A1	chr17:7466604-7482033	+	protein_coding	1.3556	2.55903	0.0178947	0.067463	2.16874	0.813148	0.854803	0.278109	0.171196	2.43268	5.25362	4.25442	3.10959	2.02674
ENSG00000167723.14_3	TRPV3	chr17:3413796-3461289	-	protein_coding	1.35556	2.55897	0.00313602	0.0251932	1.88861	0.53305	0.777387	0.636255	0.32716	0.135796	2.7705	2.16011	4.88591	1.68042
ENSG00000180879.13_3	SSR4	chrX:153058971-153063960	+	protein_coding	1.35472	2.55747	0.00459122	0.0305831	2.99355	1.63884	3.4839	2.24193	1.34734	1.75627	5.47235	9.19137	4.63197	9.8304
ENSG00000279191.1_4	AC068491.4	chr2:112079010-112082389	-	TEC	1.35468	2.5574	0.0170838	0.0653979	2.90586	1.55118	3.14783	3.02579	1.89416	0.526184	5.48551	7.63268	10.0765	4.08751
ENSG00000184613.10_3	NELL2	chr12:44902058-45315631	-	protein_coding	1.35435	2.55681	0.0178291	0.0673407	1.61858	0.264233	0.164187	0.371305	0.163922	0.119665	1.09252	6.1645	1.23637	1.65193
ENSG00000102034.16_2	ELF4	chrX:129198849-129244691	-	protein_coding	1.35392	2.55606	0.0148561	0.0601006	3.15918	1.80526	6.77042	2.23818	1.30274	1.57492	8.22067	8.52549	7.1572	7.88884
ENSG00000174013.7_2	FBXO45	chr3:196295482-196315930	+	protein_coding	1.35261	2.55374	0.00764786	0.0408148	3.6637	2.31109	2.45376	5.0421	4.39975	4.38241	7.72562	21.3889	11.5024	9.56117
ENSG00000176340.3_3	COX8A	chr11:63742079-63744015	+	protein_coding	1.35232	2.55322	0.000179328	0.0071396	5.49517	4.14285	14.957	20.0136	13.8496	18.5578	50.4945	47.5024	34.8295	45.2466
ENSG00000163900.10_2	TMEM41A	chr3:185194284-185216845	-	protein_coding	1.35175	2.55222	0.00044507	0.00995845	2.15495	0.803201	1.17063	0.686508	0.44972	0.746994	4.51237	2.91987	2.53715	4.14704
ENSG00000113790.10_3	EHHADH	chr3:184908412-184999778	-	protein_coding	1.34906	2.54747	0.00168351	0.0186301	2.5658	1.21674	1.38352	1.44736	1.18839	1.28588	5.35209	8.24856	3.16905	4.01768
ENSG00000146410.11_4	MTFR2	chr6:136552162-136571473	-	protein_coding	1.34902	2.5474	0.00141083	0.017045	1.72093	0.371911	0.554163	0.234242	0.183983	0.234761	1.82687	3.90154	1.38724	2.57007
ENSG00000160588.9_2	MPZL3	chr11:118097405-118123065	-	protein_coding	1.34717	2.54413	0.0488767	0.126747	2.79698	1.44981	4.23918	2.68488	0.563355	0.845013	8.63523	6.52683	2.35864	8.57776
ENSG00000270276.2_2	HIST2H4B	chr1:149825607-149832776	-	protein_coding	1.34681	2.5435	0.0337189	0.100021	3.24406	1.89724	4.03694	2.52259	1.78542	2.89572	6.91836	23.3115	5.59388	5.34812
ENSG00000136522.13_2	MRPL47	chr3:179306073-179322442	-	protein_coding	1.34672	2.54333	0.00228267	0.0216712	4.92192	3.5752	8.95897	13.4293	10.2078	11.5313	24.4658	45.41	20.6754	31.9648
ENSG00000180817.11_2	PPA1	chr10:71962586-71993667	-	protein_coding	1.34635	2.54268	0.00047766	0.0101007	4.24064	2.89428	9.45205	5.98605	5.13043	5.82562	14.9944	18.158	17.538	21.483
ENSG00000089127.12_3	OAS1	chr12:113344582-113371027	+	protein_coding	1.34601	2.54208	0.047998	0.125404	2.93916	1.59315	6.03466	2.20379	0.838993	0.999199	7.82812	3.23789	6.74611	10.9398
ENSG00000112312.9_3	GMNN	chr6:24775159-24786327	+	protein_coding	1.34596	2.54199	0.011697	0.0522082	3.40332	2.05736	3.14933	3.8952	2.72498	2.96678	7.80438	16.359	4.63975	13.5387
ENSG00000170190.15_4	SLC16A5	chr17:73083822-73102257	+	protein_coding	1.34594	2.54196	0.0299954	0.0932614	2.1801	0.834166	1.22483	0.954396	0.625519	0.429339	6.73516	6.90311	1.60702	1.64665
ENSG00000272993.1_3	AC239868.4	chr1:149817383-149818053	+	lincRNA	1.34551	2.54119	0.0316893	0.0961811	2.85096	1.50545	2.1155	2.33902	1.18338	1.86069	5.13089	17.6546	3.77282	3.96375
ENSG00000149346.14_2	SLX4IP	chr20:10415951-10617477	+	protein_coding	1.34534	2.54091	0.0014425	0.0171955	2.52269	1.17734	1.46323	1.49434	0.85482	1.29563	5.46132	7.39274	3.35205	3.62062
ENSG00000259345.5_4	AC013652.1	chr15:39157523-39719396	-	lincRNA	1.3445	2.53943	0.000589429	0.0111838	1.53648	0.191973	0.359718	0.074493	0.109093	0.050843	2.70354	1.04492	2.29347	1.83893
ENSG00000175832.12_3	ETV4	chr17:41605212-41656988	-	protein_coding	1.34444	2.53931	0.00321252	0.0255768	1.53656	0.192119	0.139599	0.291458	0.110228	0.0425348	2.16621	1.91924	0.742248	3.39825
ENSG00000173212.4_2	MAB21L3	chr1:116654376-116677861	+	protein_coding	1.34374	2.53809	0.0370582	0.106387	1.52146	0.177716	0.235683	0.261759	0.0498036	0	4.58206	1.05396	0.287186	3.60248
ENSG00000006704.10_3	GTF2IRD1	chr7:73868120-74016930	+	protein_coding	1.34288	2.53657	0.00097198	0.0141773	2.76201	1.41913	1.39922	1.80507	1.50994	2.02782	5.87245	3.86957	8.89578	5.39353
ENSG00000180776.15_4	ZDHHC20	chr13:21946712-22033509	-	protein_coding	1.34171	2.53452	0.0112056	0.0507848	4.48936	3.14765	9.51505	7.70148	5.69989	9.06177	16.0925	39.4655	12.9743	25.3336
ENSG00000146054.17_2	TRIM7	chr5:180620924-180632293	-	protein_coding	1.34153	2.53421	7.62961e-05	0.00542124	1.95237	0.610835	0.584587	0.923342	0.277482	0.396985	3.3155	2.54392	2.80163	2.85836
ENSG00000127328.21_3	RAB3IP	chr12:70132461-70216984	+	protein_coding	1.34096	2.53321	0.000123595	0.00618669	2.3398	0.998837	0.735295	1.04335	0.985606	1.26522	3.57685	5.62456	3.4864	3.82814
ENSG00000101782.14_3	RIOK3	chr18:21032787-21066567	+	protein_coding	1.34076	2.53284	0.0129551	0.055414	4.21536	2.87461	8.63381	6.76828	4.51677	6.00754	14.433	12.1648	14.5141	36.7759
ENSG00000079616.12_2	KIF22	chr16:29802040-29816706	+	protein_coding	1.34033	2.53209	0.0011446	0.0153248	3.1611	1.82077	2.19991	2.76574	2.18594	3.057	6.81484	6.76154	6.56895	12.9458
ENSG00000173821.19_3	RNF213	chr17:78234665-78372586	+	protein_coding	1.34029	2.53202	0.0226118	0.0779809	4.95239	3.6121	26.8572	9.98802	7.35836	7.73817	21.9907	27.5299	37.4956	35.392
ENSG00000161513.11_2	FDXR	chr17:72858619-72869156	-	protein_coding	1.33995	2.53142	0.00139365	0.0169013	2.30183	0.961884	1.09167	1.31018	0.646661	0.809171	5.47477	5.05514	2.41571	3.41421
ENSG00000112290.12_3	WASF1	chr6:110421022-110501207	-	protein_coding	1.33949	2.53061	0.012826	0.0550407	3.02808	1.68859	3.34761	3.16762	1.43512	1.44683	8.13416	12.2608	3.80277	6.61093
ENSG00000170581.13_3	STAT2	chr12:56735381-56753939	-	protein_coding	1.33794	2.5279	0.0321373	0.0970802	3.80419	2.46626	10.0457	3.80692	3.22719	3.15486	16.9374	6.29619	12.322	20.8414
ENSG00000163009.8_3	C2orf48	chr2:10281509-10351851	+	lincRNA	1.33762	2.52733	0.0203612	0.073127	1.41741	0.0797907	0.136881	0.097394	0	0	0.4162	1.03697	2.17972	4.54918
ENSG00000117448.13_3	AKR1A1	chr1:46016215-46035721	+	protein_coding	1.3368	2.5259	0.000177516	0.00711813	3.99488	2.65808	5.86856	6.05253	4.9483	4.50865	13.6309	19.4868	12.0454	15.5239
ENSG00000067606.16_3	PRKCZ	chr1:1981909-2116834	+	protein_coding	1.33453	2.52194	2.79438e-06	0.00208414	1.78287	0.448333	0.359886	0.448382	0.411469	0.24678	2.86659	2.41674	2.1209	2.40067
ENSG00000100749.7_3	VRK1	chr14:97263641-97398059	+	protein_coding	1.33401	2.52103	0.0312305	0.0953909	3.90916	2.57515	5.17144	4.849	4.21446	5.70052	8.4748	34.2513	7.60956	16.7163
ENSG00000145860.11_3	RNF145	chr5:158584417-158637061	-	protein_coding	1.33231	2.51805	0.00917095	0.0451555	3.8752	2.54289	7.42939	4.14202	3.91857	4.40981	8.04225	23.6838	11.913	15.0876
ENSG00000261068.2_3	AL512274.1	chr6:42059971-42061997	-	lincRNA	1.3311	2.51594	0.0222766	0.0773614	2.02638	0.695282	1.10686	1.51358	0.186611	0.093872	3.05381	1.44762	2.8799	6.15447
ENSG00000074696.12_2	HACD3	chr15:65822756-65870690	+	protein_coding	1.33013	2.51425	0.00165603	0.0185083	3.76538	2.43525	5.21864	5.01126	3.52579	4.05798	14.2859	18.8792	9.3658	9.85614
ENSG00000206527.9_2	HACD2	chr3:123209667-123304032	-	protein_coding	1.32842	2.51128	0.0199191	0.0722151	3.64328	2.31486	7.7027	3.69689	2.48654	3.30039	17.4374	15.1188	10.8108	5.94435
ENSG00000142178.7_2	SIK1	chr21:44834395-44847008	-	protein_coding	1.32731	2.50934	0.0498762	0.128097	3.80523	2.47792	3.8316	5.30664	4.72631	4.52014	10.2188	5.18764	35.869	13.9218
ENSG00000170638.9_2	TRABD	chr22:50624344-50638027	+	protein_coding	1.32699	2.50878	0.0173646	0.0661356	3.50211	2.17512	5.31649	3.74389	2.69602	2.7563	5.91866	21.5094	7.99289	10.7672
ENSG00000158716.8_2	DUSP23	chr1:159750722-159752333	+	protein_coding	1.32654	2.50801	0.00738125	0.0399182	3.81669	2.49015	6.02844	5.02046	3.42593	4.32048	11.73	25.1916	9.69912	10.0514
ENSG00000116478.11_2	HDAC1	chr1:32757687-32799236	+	protein_coding	1.32649	2.50792	0.00226209	0.02155	4.58339	3.2569	5.92953	9.72345	9.63341	9.56799	21.7931	34.7871	16.7891	21.7652
ENSG00000041802.10_2	LSG1	chr3:194361517-194393206	-	protein_coding	1.32648	2.5079	0.000694056	0.0120414	4.32309	2.99661	7.57605	8.14675	7.17951	5.32411	25.5846	19.2357	13.8378	19.1098
ENSG00000184428.12_2	TOP1MT	chr8:144386554-144442149	-	protein_coding	1.32623	2.50746	0.000991923	0.0143097	2.90467	1.57844	2.04684	2.32627	1.73867	1.86605	6.45003	8.49999	7.99599	3.93899
ENSG00000100426.6_3	ZBED4	chr22:50247490-50283726	+	protein_coding	1.32449	2.50445	0.00271568	0.0236433	3.03042	1.70593	2.12547	2.76336	2.09063	2.11606	4.66932	12.4602	6.92006	6.37357
ENSG00000138442.9_2	WDR12	chr2:203739505-203879521	-	protein_coding	1.32425	2.50403	0.0174752	0.0664034	3.02506	1.70081	2.4154	2.4438	2.00074	2.16422	5.55677	7.99999	15.7507	3.44186
ENSG00000128050.8_2	PAICS	chr4:57301907-57330745	+	protein_coding	1.324	2.50359	0.000212464	0.00760891	3.05467	1.73067	2.37111	2.57704	1.93152	2.43196	7.31435	9.94365	7.07647	5.48592
ENSG00000197472.14_3	ZNF695	chr1:247108849-247171395	-	protein_coding	1.32354	2.5028	0.00864737	0.0437063	1.39096	0.067417	0	0.145839	0.0520937	0	0.885859	3.8699	0.738488	1.96266
ENSG00000213853.9_3	EMP2	chr16:10622279-10674555	-	protein_coding	1.32252	2.50103	0.00332904	0.0260348	3.84289	2.52037	6.63308	5.19112	3.82283	3.75399	15.7051	8.89134	11.5616	19.4246
ENSG00000154102.10_4	C16orf74	chr16:85723690-85784735	-	protein_coding	1.32188	2.49992	0.0111657	0.0506555	1.59536	0.273476	0.1366	0.196975	0.28112	0.224659	4.951	1.05977	2.31104	1.05412
ENSG00000147509.13_2	RGS20	chr8:54764368-54871863	+	protein_coding	1.32169	2.49958	0.00305168	0.0248766	1.39266	0.0709764	0.0812254	0.1115	0	0.0130676	1.36672	3.34399	1.65263	0.742694
ENSG00000270170.1_2	NCBP2-AS2	chr3:196669494-196670411	+	protein_coding	1.32161	2.49946	0.00296495	0.0245639	3.59781	2.2762	1.97531	5.53429	3.61098	5.14172	13.4242	10.6605	9.63139	11.017
ENSG00000180346.3_2	TIGD2	chr4:90032651-90036050	+	protein_coding	1.32043	2.49741	0.00698699	0.0387066	2.307	0.986574	1.40488	1.10285	0.592178	0.914516	6.86171	2.02879	3.12232	5.10917
ENSG00000249007.1_4	AL691482.3	chr1:201980498-201984785	+	sense_intronic	1.32029	2.49716	0.0347225	0.101971	1.47796	0.15767	0.02435	0.468615	0.029193	0	5.69334	1.58495	0.401971	1.48203
ENSG00000261553.5_4	AL137782.1	chr13:76123909-76381256	+	processed_transcript	1.31945	2.49571	0.00313767	0.0251932	3.20378	1.88433	3.3427	3.98063	2.12685	1.74667	7.74788	10.7248	5.4712	9.85791
ENSG00000248206.1_4	AC074194.1	chr4:184908831-184909903	+	sense_intronic	1.31923	2.49532	0.0299993	0.0932614	1.92283	0.603608	1.36547	0.685933	0	0.336777	2.77944	7.07564	1.64958	1.55588
ENSG00000082153.17_3	BZW1	chr2:201675317-201692061	+	protein_coding	1.31916	2.49521	0.0220154	0.0769571	4.01178	2.69262	9.18664	4.84068	4.35157	4.48606	10.3057	17.1901	30.6377	9.40696
ENSG00000213977.7_3	TAX1BP3	chr17:3566190-3571976	-	protein_coding	1.31827	2.49367	0.00310542	0.0251026	4.73643	3.41816	15.9997	8.94484	7.37638	8.22093	32.4044	23.971	19.3725	28.7128
ENSG00000092140.14_3	G2E3	chr14:31028329-31089269	+	protein_coding	1.31804	2.49327	0.0229598	0.0786959	2.76187	1.44383	2.03386	1.82542	1.43355	1.62557	4.52703	6.25657	2.57588	13.7574
ENSG00000179431.6_2	FJX1	chr11:35639967-35642416	+	protein_coding	1.31674	2.49103	9.49562e-07	0.00193149	1.62438	0.307642	0.358834	0.278736	0.180238	0.144251	2.13408	1.99407	2.26256	1.95137
ENSG00000128059.8_2	PPAT	chr4:57259528-57301781	-	protein_coding	1.31612	2.48996	0.000114137	0.00599489	2.41303	1.09691	1.1936	1.0943	1.12686	1.14229	5.04345	5.49892	3.96621	3.12506
ENSG00000111665.11_2	CDCA3	chr12:6953957-6961230	-	protein_coding	1.31609	2.4899	0.000547539	0.0106997	1.41475	0.0986618	0.100218	0.131104	0.0258406	0.0297681	1.12765	1.90919	1.17474	2.75363
ENSG00000183336.8_3	BOLA2	chr16:29454377-29466285	-	protein_coding	1.31578	2.48936	7.50187e-05	0.00540818	2.37057	1.05479	1.41747	0.910122	0.983	1.034	3.77665	3.48435	4.1625	5.46795
ENSG00000196937.10_3	FAM3C	chr7:120988905-121036418	-	protein_coding	1.31439	2.48697	0.00649367	0.0372076	6.14689	4.8325	24.3932	29.4726	27.9718	28.3977	103.127	93.2888	64.0266	38.4892
ENSG00000084774.13_2	CAD	chr2:27440258-27466811	+	protein_coding	1.31378	2.48591	0.00263978	0.0233379	2.86252	1.54875	2.83759	1.95809	1.49805	1.5835	7.12275	9.57947	4.09735	5.38719
ENSG00000213468.5_4	FIRRE	chrX:130825558-130964671	-	lincRNA	1.31364	2.48567	0.0455994	0.121246	1.57463	0.260993	0.550596	0.0747839	0.122874	0.101834	3.66855	0.0526624	2.57721	3.47742
ENSG00000176658.16_3	MYO1D	chr17:30819540-31204195	-	protein_coding	1.31303	2.48462	0.000674173	0.0118311	4.06251	2.74948	5.32838	7.03217	5.51515	5.17525	22.8518	12.4379	15.9508	13.3451
ENSG00000277075.2_2	HIST1H2AE	chr6:26217203-26217711	+	protein_coding	1.31236	2.48347	0.023315	0.0794674	7.3261	6.01375	39.7873	74.0142	68.9905	80.3892	134.092	227.877	82.8875	254.611
ENSG00000042980.12_2	ADAM28	chr8:24151553-24216531	+	protein_coding	1.30974	2.47898	0.0469601	0.123425	2.03626	0.726511	1.01035	0.785115	0.360185	0.535571	1.61122	10.2088	1.39684	3.03511
ENSG00000183814.15_2	LIN9	chr1:226418850-226497570	-	protein_coding	1.30893	2.47758	0.00884633	0.0442811	2.33621	1.02728	1.32485	0.992625	0.699165	1.19233	2.72155	7.45457	2.20855	5.44101
ENSG00000163655.15_2	GMPS	chr3:155588325-155661815	+	protein_coding	1.30888	2.47749	0.000624369	0.0114793	4.40413	3.09525	6.71848	8.37674	7.09644	8.10269	16.4831	29.6321	16.6153	20.3017
ENSG00000145623.12_3	OSMR	chr5:38845960-38945698	+	protein_coding	1.3086	2.47701	0.0199661	0.072257	3.99423	2.68563	10.3982	3.66284	5.43161	4.01205	15.3213	15.7686	24.3069	8.31194
ENSG00000279141.3_2	LINC01451	chr9:139506476-139511633	-	lincRNA	1.30771	2.47548	0.0158627	0.0625138	1.32489	0.017184	0.00128441	0.0322131	0	0.0147632	1.97596	3.71409	0.289584	1.17697
ENSG00000117308.14_3	GALE	chr1:24122089-24127294	-	protein_coding	1.30664	2.47365	0.00186417	0.0194819	1.7917	0.485057	0.326716	0.50896	0.405106	0.364274	1.5408	4.61053	2.18409	2.16561
ENSG00000268427.1	AL022328.1	chr22:50714103-50714350	+	protein_coding	1.30591	2.47239	0.00448766	0.0302444	1.54235	0.236445	0	0	0.500178	0.284002	1.06488	2.06325	1.42009	3.70182
ENSG00000139324.11_3	TMTC3	chr12:88536073-88593664	+	protein_coding	1.30352	2.46831	0.0114386	0.0514863	4.7755	3.47198	7.48288	12.4835	10.5708	10.4544	22.012	52.9749	17.9265	22.9365
ENSG00000135823.13_3	STX6	chr1:180941848-180992257	-	protein_coding	1.30323	2.46781	0.00176598	0.018979	3.72443	2.4212	4.78783	6.45133	2.95331	3.82727	9.3612	11.2562	13.4555	15.6288
ENSG00000111344.11_3	RASAL1	chr12:113536624-113574044	-	protein_coding	1.30314	2.46766	0.0168519	0.0648652	1.37215	0.0690104	0.0297992	0.175829	0	0	2.11048	1.05029	0.407703	4.00131
ENSG00000113838.12_3	TBCCD1	chr3:186263862-186288332	-	protein_coding	1.30291	2.46726	0.000668719	0.0118311	2.52235	1.21944	2.12838	1.63477	0.691825	1.10829	5.15014	5.04266	4.08002	4.77068
ENSG00000076826.9_2	CAMSAP3	chr19:7660788-7683190	+	protein_coding	1.30232	2.46626	0.000110823	0.0059213	1.48932	0.186997	0.0893357	0.258604	0.074853	0.139638	2.09453	1.60867	1.23753	2.43983
ENSG00000176853.15_3	FAM91A1	chr8:124780696-124827692	+	protein_coding	1.30134	2.46458	0.0041711	0.029156	4.24708	2.94574	12.1262	6.4454	4.44419	5.62305	19.2509	19.6891	19.0754	14.4577
ENSG00000269958.1_4	AL049840.4	chr14:104162690-104163500	+	sense_intronic	1.30109	2.46415	0.00060837	0.011299	2.74447	1.44338	3.02934	1.49128	1.30959	1.35947	5.17815	6.11018	6.22867	5.35152
ENSG00000155660.10_3	PDIA4	chr7:148700154-148725733	-	protein_coding	1.30043	2.46302	0.000135033	0.00646592	6.11947	4.81904	26.7757	36.3238	24.2707	23.2348	74.7292	61.8773	68.3388	69.7689
ENSG00000179387.9_3	ELMOD2	chr4:141445312-141474924	+	protein_coding	1.30032	2.46284	0.0444037	0.119223	3.01128	1.71095	2.39982	2.4838	1.70534	2.58476	6.74757	20.2222	3.05924	5.33192
ENSG00000272518.1_4	AC036214.2	chr8:80868700-80869616	-	sense_intronic	1.29979	2.46193	0.015921	0.0626617	2.80925	1.50946	1.07665	3.3636	1.62222	1.765	5.46223	11.8188	3.3953	5.62918
ENSG00000058063.15_3	ATP11B	chr3:182511288-182639423	+	protein_coding	1.29804	2.45895	0.0048919	0.0317264	4.8148	3.51676	14.1691	11.2923	7.61707	9.68179	19.0437	37.7778	21.0492	35.6136
ENSG00000105514.7_3	RAB3D	chr19:11432722-11456946	-	protein_coding	1.2975	2.45803	0.00723193	0.0394093	3.39604	2.09854	6.01561	3.45927	1.68969	2.99814	9.14848	12.0748	6.87681	10.7503
ENSG00000108010.11_2	GLRX3	chr10:131934663-131982785	+	protein_coding	1.29743	2.4579	4.4478e-05	0.00485461	3.03925	1.74183	2.9786	1.97985	1.83809	2.71893	7.71928	6.77255	7.13086	7.28793
ENSG00000125885.13_4	MCM8	chr20:5931298-5979623	+	protein_coding	1.29595	2.45538	0.000856944	0.013169	3.08734	1.7914	1.9023	2.93886	2.14366	2.99492	6.03609	10.5804	5.93559	8.2341
ENSG00000170727.7	BOP1	chr8:145486055-145515082	-	protein_coding	1.29519	2.45409	0.000349909	0.00908391	2.76726	1.47207	1.4718	2.28766	1.70781	1.69173	6.50898	6.84979	6.38854	3.93299
ENSG00000053108.16_3	FSTL4	chr5:132532147-132948255	-	protein_coding	1.29516	2.45403	0.000532059	0.0105286	1.32938	0.0342281	0.0168662	0.027483	0.0146773	0.0371661	1.597	0.7154	2.17057	1.82334
ENSG00000143179.14_3	UCK2	chr1:165796768-165880855	+	protein_coding	1.29486	2.45353	0.00124093	0.0160126	2.39209	1.09723	1.33565	1.17513	1.06712	0.994982	3.31133	5.40583	2.81167	6.21203
ENSG00000126067.11_2	PSMB2	chr1:36065145-36107445	-	protein_coding	1.29366	2.4515	0.000228212	0.00780108	3.03643	1.74276	3.38786	2.03088	1.76838	2.40759	6.29263	7.53376	6.7381	8.40944
ENSG00000142621.19_2	FHAD1	chr1:15573768-15726779	+	protein_coding	1.29366	2.45149	0.0107798	0.049711	1.55759	0.263926	0.0527047	0.301779	0.241603	0.221722	1.03948	2.2517	1.01973	4.60528
ENSG00000114331.13_3	ACAP2	chr3:194995465-195163807	-	protein_coding	1.29325	2.4508	0.00427798	0.0295174	4.56727	3.27402	12.9399	8.12058	7.70765	6.90909	29.1366	18.7105	15.7724	30.7067
ENSG00000121644.18_2	DESI2	chr1:244816237-244872335	+	protein_coding	1.29186	2.44844	0.00304814	0.0248766	3.88327	2.59141	5.77521	4.81512	4.40838	5.19184	10.6197	21.4948	9.32468	16.57
ENSG00000147231.13_2	CXorf57	chrX:105855160-105922672	+	protein_coding	1.29162	2.44803	2.92664e-05	0.00411202	1.56552	0.273895	0.241264	0.232503	0.098241	0.271901	1.38547	2.2508	2.17443	2.11776
ENSG00000154642.10_4	C21orf91	chr21:19161284-19191703	-	protein_coding	1.29162	2.44803	2.03102e-05	0.00352279	3.20153	1.90991	2.50956	2.67449	3.39951	2.51485	7.60844	7.3848	8.40324	9.55189
ENSG00000091073.19_3	DTX2	chr7:76090993-76135312	+	protein_coding	1.29119	2.44731	0.0136596	0.057149	2.82868	1.53748	2.0481	2.33086	1.60595	1.68388	11.275	2.82067	5.01353	8.03183
ENSG00000173218.14_2	VANGL1	chr1:116184574-116240845	+	protein_coding	1.2911	2.44714	0.0107978	0.0497632	2.71193	1.42083	1.27772	2.08344	1.34325	2.12243	3.47073	10.6794	6.72019	3.57146
ENSG00000163389.10_2	POGLUT1	chr3:119187785-119213555	+	protein_coding	1.29026	2.44572	0.002341	0.0219309	2.27551	0.985253	1.26286	1.19302	0.734798	0.784075	3.55268	2.57068	3.3946	6.6923
ENSG00000171793.13_2	CTPS1	chr1:41445007-41478237	+	protein_coding	1.28993	2.44516	0.0144295	0.0590779	3.75072	2.46079	1.71851	5.22297	5.98844	6.76931	10.9285	17.4508	11.9378	10.5308
ENSG00000123136.14_2	DDX39A	chr19:14519631-14530195	-	protein_coding	1.28962	2.44464	0.00512081	0.0325691	3.27452	1.98489	5.32661	3.16039	2.11421	1.99501	7.21754	12.5176	8.50355	7.3059
ENSG00000111907.20_4	TPD52L1	chr6:125440195-125585553	+	protein_coding	1.289	2.44358	0.0216501	0.0762867	2.98296	1.69396	2.01446	6.27468	1.28574	1.18617	6.87644	7.25806	8.35575	5.42028
ENSG00000178814.16_3	OPLAH	chr8:145106167-145118868	-	protein_coding	1.28871	2.44309	0.00321566	0.0255768	2.24122	0.95251	1.49661	0.864353	0.678753	0.79503	6.55623	3.5538	3.22264	2.439
ENSG00000282034.1_4	AC106886.5	chr16:30715388-30756490	+	protein_coding	1.28824	2.4423	0.00573329	0.0346709	1.62379	0.335549	0.610969	0.120868	0.087422	0.291223	0.963804	4.03338	1.89779	2.14931
ENSG00000187522.14_3	HSPA14	chr10:14880163-14913740	+	protein_coding	1.28703	2.44025	0.00528551	0.0331177	2.94124	1.65421	3.28658	2.31973	1.53938	1.71599	6.0411	10.5565	4.05583	7.45954
ENSG00000259306.2_3	AC020891.2	chr15:51608038-51614193	+	lincRNA	1.28584	2.43824	0.0269674	0.0874233	1.30283	0.0169892	0	0	0	0.048231	1.35277	0.414584	4.84797	0.903484
ENSG00000144395.17_3	CCDC150	chr2:197504278-197628214	+	protein_coding	1.28505	2.4369	0.000975122	0.0142047	1.53668	0.251634	0.262453	0.234252	0.0996601	0.17252	1.21671	3.12033	2.28991	1.35789
ENSG00000159377.10_2	PSMB4	chr1:151372010-151374420	+	protein_coding	1.28493	2.4367	0.00367836	0.0273614	4.284	2.99907	9.48124	6.82986	4.91401	7.41765	14.1361	26.2626	13.9103	22.4088
ENSG00000054277.13_3	OPN3	chr1:241753404-241840678	-	protein_coding	1.28424	2.43553	0.00559566	0.0342178	1.83653	0.552297	0.848391	0.40552	0.273863	0.397265	1.56077	3.36372	1.59346	4.61438
ENSG00000165506.14_3	DNAAF2	chr14:50091892-50101948	-	protein_coding	1.28378	2.43476	0.000303595	0.00864242	2.91231	1.62853	1.55704	2.6393	2.08812	2.18053	5.79984	8.68695	6.77298	5.2733
ENSG00000227403.1_2	LINC01806	chr2:162101250-162105561	+	lincRNA	1.28355	2.43437	0.0218102	0.0765727	1.42918	0.145633	0.363168	0.0909909	0.00690674	0	2.28569	4.31246	1.0486	0.470708
ENSG00000137504.13_2	CREBZF	chr11:85370752-85393951	-	protein_coding	1.28262	2.43281	0.00123405	0.0159514	3.90539	2.62277	6.27861	5.63678	4.18986	4.7407	17.3419	18.4295	11.6067	10.2215
ENSG00000198742.9_2	SMURF1	chr7:98625061-98741723	-	protein_coding	1.28206	2.43186	0.0130488	0.0555705	3.844	2.56193	6.16199	4.94257	3.47113	5.38926	24.3417	8.63898	16.5557	8.91625
ENSG00000066084.12_2	DIP2B	chr12:50898768-51142450	+	protein_coding	1.28153	2.43096	0.00358278	0.0270006	3.94971	2.66818	8.99815	5.62626	3.68877	4.25488	16.359	16.7099	10.7768	14.7455
ENSG00000137843.11_3	PAK6	chr15:40530960-40569688	+	protein_coding	1.28126	2.43052	1.12875e-05	0.00277535	1.47623	0.194968	0.0647806	0.22103	0.129636	0.169067	1.89398	1.93945	2.02732	1.3267
ENSG00000108590.10_2	MED31	chr17:6546635-6554954	-	protein_coding	1.2801	2.42855	0.00160763	0.0182163	2.28605	1.00596	2.05915	0.637542	0.914524	0.696063	4.89036	3.84182	3.05208	3.89616
ENSG00000110492.15_4	MDK	chr11:46402306-46405387	+	protein_coding	1.2796	2.42772	0.038562	0.109275	3.55345	2.27384	8.37101	3.33217	2.76073	2.58275	11.7478	18.7762	4.92811	11.714
ENSG00000196976.7_3	LAGE3	chrX:153706108-153707596	-	protein_coding	1.27859	2.42602	0.000210611	0.00760891	2.36229	1.0837	1.14859	1.11329	1.12904	1.08742	3.93629	6.01222	3.12751	3.89262
ENSG00000068885.14_4	IFT80	chr3:159974774-160117668	-	protein_coding	1.27665	2.42276	0.000782147	0.0127184	3.48182	2.20517	3.99822	4.14786	3.79431	2.66535	11.2023	13.6706	7.41584	9.34047
ENSG00000187741.14_3	FANCA	chr16:89803957-89883065	-	protein_coding	1.27637	2.42229	9.69861e-05	0.00575614	1.4728	0.196425	0.254181	0.22416	0.05121	0.0681488	1.61016	1.45378	1.5919	2.57523
ENSG00000187164.19_4	SHTN1	chr10:118640993-118886097	-	protein_coding	1.27395	2.41823	0.00316534	0.0253397	3.51	2.23605	5.4657	4.8127	2.30219	2.96895	11.9497	10.1209	7.72097	12.4122
ENSG00000183558.5	HIST2H2AA3	chr1:149813505-149814478	-	protein_coding	1.27395	2.41823	0.00618377	0.0361707	7.43256	6.15861	81.3174	78.9031	61.3234	62.5328	120.747	298.009	134.356	179.748
ENSG00000123353.9_2	ORMDL2	chr12:56211703-56215663	+	protein_coding	1.27346	2.41741	0.00506754	0.0323732	1.9473	0.673837	1.44913	0.185244	0.333762	0.672949	2.55309	4.18096	1.83233	3.24247
ENSG00000037965.5_3	HOXC8	chr12:54402890-54406146	+	protein_coding	1.27325	2.41705	0.00764486	0.0408146	1.38626	0.113011	0.143756	0.148378	0.041503	0	0.428642	2.09774	1.59629	3.06353
ENSG00000065923.9_3	SLC9A7	chrX:46458687-46618607	-	protein_coding	1.27287	2.41641	0.0109787	0.0501325	2.3566	1.08373	0.828345	1.67817	1.11356	0.949986	2.70621	2.671	4.20501	8.71608
ENSG00000184465.15_3	WDR27	chr6:169857307-170102144	-	protein_coding	1.27262	2.416	0.000645765	0.0116337	3.0623	1.78967	3.05074	2.71776	2.23216	1.93544	8.80192	6.25853	9.52135	5.50341
ENSG00000171056.7_3	SOX7	chr8:10581278-10588022	-	protein_coding	1.27258	2.41593	0.0476615	0.124728	2.86333	1.59075	1.65803	1.52485	2.94827	2.10635	2.06167	11.868	11.2338	4.81787
ENSG00000155380.11_3	SLC16A1	chr1:113454469-113499635	-	protein_coding	1.27252	2.41583	0.0414458	0.114149	3.861	2.58848	7.38526	4.17736	4.58479	4.39772	19.5147	11.6191	26.4229	5.2791
ENSG00000164683.16_3	HEY1	chr8:80676245-80680098	-	protein_coding	1.27206	2.41506	0.0331085	0.098798	3.09165	1.81959	3.35156	3.24347	2.15163	1.66753	7.06808	18.9672	4.22728	5.27127
ENSG00000076864.19_3	RAP1GAP	chr1:21922708-21995856	-	protein_coding	1.27145	2.41403	0.00287836	0.0242939	1.84883	0.57738	0.838124	0.524597	0.352194	0.308177	1.56776	4.08847	3.45245	1.8938
ENSG00000037474.14_2	NSUN2	chr5:6599352-6633404	-	protein_coding	1.27058	2.41258	0.000313286	0.00874036	3.9944	2.72383	6.65214	5.28146	4.54503	6.14604	19.1609	15.1633	11.6516	14.6515
ENSG00000182117.5_2	NOP10	chr15:34633914-34635378	-	protein_coding	1.26953	2.41083	0.00668765	0.0377774	4.51952	3.24999	15.9656	7.19461	6.87376	6.48349	22.5402	28.3557	20.8834	17.2991
ENSG00000163882.9_2	POLR2H	chr3:184079506-184086384	+	protein_coding	1.26846	2.40904	0.000205254	0.00752104	2.77002	1.50156	2.35926	1.86246	1.47699	1.69871	4.79822	7.73993	5.84951	5.23699
ENSG00000108883.12_2	EFTUD2	chr17:42927311-42977030	-	protein_coding	1.26819	2.4086	0.000630207	0.0115266	3.01117	1.74298	2.78074	2.65689	2.20392	1.83391	6.64816	10.4045	5.82723	6.09474
ENSG00000173457.10_3	PPP1R14B	chr11:64011952-64014413	-	protein_coding	1.26804	2.40834	0.000809825	0.0129544	4.60671	3.33867	10.5905	10.1449	6.78389	9.41809	23.6399	27.6036	27.0556	16.8219
ENSG00000149716.12_2	ORAOV1	chr11:69467844-69490184	-	protein_coding	1.2667	2.4061	0.0306362	0.0944409	2.83994	1.57324	2.14143	2.43947	1.43269	1.9831	3.63196	2.97116	9.33691	12.8215
ENSG00000113583.7_2	C5orf15	chr5:133291193-133304478	-	protein_coding	1.26629	2.40542	0.00391705	0.0281632	4.18748	2.92119	11.6605	5.2522	5.26436	5.63911	13.5882	19.3695	20.5666	16.1977
ENSG00000215788.9_3	TNFRSF25	chr1:6521211-6526255	-	protein_coding	1.26369	2.40108	0.0030373	0.0248268	2.07143	0.807742	1.06402	0.734904	0.589304	0.649765	2.88331	1.73892	5.27376	3.67669
ENSG00000064115.10_3	TM7SF3	chr12:27126128-27167367	-	protein_coding	1.26365	2.40102	0.00787481	0.0414235	3.81375	2.5501	6.14429	4.71448	3.83915	4.9556	7.29349	13.5484	13.0514	22.0645
ENSG00000136824.18_3	SMC2	chr9:106856541-106903698	+	protein_coding	1.26255	2.39919	0.00465833	0.0307645	4.60777	3.34522	5.14419	12.6512	9.76865	10.8098	24.637	30.2349	19.0708	20.9902
ENSG00000179862.6_2	CITED4	chr1:41326723-41328038	-	protein_coding	1.26241	2.39897	0.00283891	0.0241709	2.11919	0.856777	1.27246	0.615952	0.600067	0.830622	3.31867	2.12329	2.92774	5.72445
ENSG00000164466.12_3	SFXN1	chr5:174904065-174956745	+	protein_coding	1.26128	2.39708	0.000479521	0.0101007	2.62091	1.35963	1.92847	1.50455	1.57756	1.29391	4.05866	4.9581	7.62144	4.51018
ENSG00000134109.10_2	EDEM1	chr3:5229331-5261642	+	protein_coding	1.26083	2.39634	0.013968	0.0579615	3.49667	2.23584	7.01795	3.49491	2.70296	2.68883	6.71865	15.9811	8.2992	12.3187
ENSG00000171004.18_4	HS6ST2	chrX:131760044-132095423	-	protein_coding	1.26066	2.39606	0.00219048	0.0211806	1.39141	0.130741	0.0458767	0.0905909	0.138182	0.10681	2.24987	2.55773	0.67129	1.45092
ENSG00000004455.16_2	AK2	chr1:33473541-33546597	-	protein_coding	1.26007	2.39507	0.00045444	0.00999892	3.42852	2.16845	4.98868	3.31257	2.99679	2.95635	7.51604	10.0397	10.8913	11.0205
ENSG00000270116.1_3	AP001429.1	chr21:38473114-38473643	+	sense_intronic	1.26003	2.395	0.00281107	0.0240711	2.59052	1.33049	2.63442	1.3236	1.42929	0.949827	7.52176	4.61243	4.72806	3.80403
ENSG00000119013.8_2	NDUFB3	chr2:201936156-201950473	+	protein_coding	1.2587	2.39281	0.0162165	0.0633679	4.85454	3.59583	7.85161	12.7776	11.8423	12.645	19.1209	24.4795	57.8774	22.2091
ENSG00000181827.14_3	RFX7	chr15:56379478-56535464	-	protein_coding	1.2575	2.39081	0.0151188	0.0607003	3.03747	1.77996	4.03001	1.26489	3.8954	1.49393	6.86912	11.5097	5.40482	6.20762
ENSG00000253293.4_3	HOXA10	chr7:27210210-27219880	-	protein_coding	1.25743	2.39069	0.0279299	0.0891103	1.38755	0.130122	0.147231	0.195702	0	0.045703	1.69703	4.76418	0.366165	1.20623
ENSG00000236740.6_4	AL033384.1	chr6:53794820-53862465	+	lincRNA	1.25704	2.39006	0.0345386	0.101591	1.33851	0.0814699	0.140598	0.0574485	0	0.0392208	1.1918	0.11314	3.88269	2.43337
ENSG00000117632.22_3	STMN1	chr1:26210672-26233482	-	protein_coding	1.25684	2.38972	0.00247703	0.0226211	3.95444	2.6976	5.17149	5.58696	6.01336	5.21205	13.3998	14.51	9.60338	23.3901
ENSG00000181790.10_3	ADGRB1	chr8:143530791-143626370	+	protein_coding	1.25581	2.38801	0.0495809	0.127779	1.59041	0.334604	0.521278	0.306415	0.13286	0.123149	1.29949	0.310023	5.35575	3.29505
ENSG00000125450.10_2	NUP85	chr17:73201754-73231853	+	protein_coding	1.25558	2.38764	0.00160027	0.0182034	2.63264	1.37706	2.54476	1.57571	1.11762	1.35401	6.23424	6.78068	3.75793	4.52312
ENSG00000080819.6_3	CPOX	chr3:98239976-98312567	-	protein_coding	1.25492	2.38654	9.23272e-06	0.00271703	3.62908	2.37416	4.26347	4.82525	3.53784	4.19202	10.8912	10.7113	11.2038	12.7886
ENSG00000119285.10_3	HEATR1	chr1:236712305-236767804	-	protein_coding	1.2546	2.38602	0.00265131	0.0233831	4.14945	2.89484	7.80914	7.0864	5.57955	5.52913	13.4881	25.7103	12.1502	18.49
ENSG00000156299.13_3	TIAM1	chr21:32490734-32932290	-	protein_coding	1.25446	2.38579	0.0352195	0.102915	2.70271	1.44825	4.13431	1.7897	0.940365	0.995004	5.34984	2.81841	5.36604	10.638
ENSG00000139800.8_2	ZIC5	chr13:100615218-100624163	-	protein_coding	1.25438	2.38565	0.0294663	0.0923144	1.28516	0.030782	0	0.069595	0	0.01823	1.66194	4.38667	0.262176	0.94918
ENSG00000221829.9_3	FANCG	chr9:35073832-35080013	-	protein_coding	1.25414	2.38524	0.00266115	0.0233831	1.9237	0.669559	0.624501	0.793907	0.342331	0.636249	2.49514	4.84187	1.62063	2.87203
ENSG00000172757.12_3	CFL1	chr11:65590493-65629497	-	protein_coding	1.25414	2.38524	0.00773984	0.0410865	3.78691	2.53277	8.2702	4.24895	3.65688	3.94882	11.911	20.5582	11.2437	9.65136
ENSG00000131475.6_2	VPS25	chr17:40925454-40931617	+	protein_coding	1.25399	2.385	0.000600072	0.0112411	3.03129	1.7773	2.99782	2.38349	1.82426	2.61401	6.90252	9.96911	5.41855	7.02907
ENSG00000154978.12_2	VOPP1	chr7:55503749-55640681	-	protein_coding	1.2535	2.38418	0.0123704	0.0540042	3.78965	2.53616	9.2837	4.99721	3.00651	3.58113	13.7854	15.4825	8.39586	14.9736
ENSG00000158201.9_3	ABHD3	chr18:19230858-19284766	-	protein_coding	1.25286	2.38314	0.00301502	0.0247722	2.54899	1.29613	2.1549	1.60521	1.53037	0.748587	4.39376	7.53037	3.58216	4.56371
ENSG00000114993.16_2	RTKN	chr2:74652963-74669549	-	protein_coding	1.25182	2.38141	0.0069817	0.0386959	3.16589	1.91407	3.66387	3.29435	2.16967	2.17773	7.97344	13.1087	8.25085	4.53969
ENSG00000003056.3	M6PR	chr12:9092959-9102551	-	protein_coding	1.25133	2.38061	0.000323288	0.00887554	3.76542	2.51409	4.70494	6.03121	4.92812	3.47782	11.5865	14.9592	13.688	10.5915
ENSG00000134504.12_3	KCTD1	chr18:24034874-24237365	-	protein_coding	1.25101	2.38008	5.27853e-06	0.00254093	2.88001	1.62899	2.01807	2.22892	2.05095	2.0781	6.23396	5.38111	6.66308	7.3023
ENSG00000164087.7_3	POC1A	chr3:52109269-52188706	-	protein_coding	1.25084	2.3798	0.00364424	0.0272601	1.61594	0.365101	0.412471	0.327911	0.0875245	0.349082	1.71661	3.79617	1.0472	2.30906
ENSG00000103404.14_3	USP31	chr16:23072727-23160591	-	protein_coding	1.25054	2.3793	0.0101819	0.0480661	2.93799	1.68745	1.36539	1.83083	2.89679	3.12446	10.4963	3.82742	8.53432	5.51819
ENSG00000167004.12_2	PDIA3	chr15:44038590-44065477	+	protein_coding	1.24994	2.37832	1.06148e-05	0.00276635	5.74423	4.49429	24.6008	22.1572	20.8324	18.9353	58.256	52.414	51.8138	48.387
ENSG00000169118.17_3	CSNK1G1	chr15:64457716-64648458	-	protein_coding	1.24962	2.37779	0.00040811	0.00961208	2.52519	1.27557	2.06155	1.01554	1.38993	1.32926	4.72929	6.24711	3.75306	4.5641
ENSG00000152683.14_3	SLC30A6	chr2:32390910-32449448	+	protein_coding	1.24947	2.37755	0.00876086	0.0440546	2.49717	1.2477	2.55569	0.928928	0.842649	1.51593	6.42451	3.92525	2.72816	6.45259
ENSG00000122483.17_2	CCDC18	chr1:93645476-93744287	+	protein_coding	1.24904	2.37683	0.0144812	0.059138	3.21746	1.96842	5.40179	2.90483	1.97829	2.15027	5.8569	14.8074	6.63742	8.04217
ENSG00000153574.8_2	RPIA	chr2:88991162-89050452	+	protein_coding	1.24889	2.37659	0.0179674	0.0675665	3.71163	2.46274	7.9806	5.12506	2.80632	3.41073	15.3977	18.1155	7.24254	10.4029
ENSG00000119682.16_3	AREL1	chr14:75120140-75179818	-	protein_coding	1.24736	2.37406	0.0330521	0.0986449	2.7658	1.51845	5.43712	1.12159	1.32261	1.12354	7.74586	7.39311	5.65985	3.37689
ENSG00000179958.8_2	DCTPP1	chr16:30434940-30441396	-	protein_coding	1.24718	2.37377	0.00302841	0.0247927	2.64029	1.39311	2.51599	1.60633	2.01109	0.724532	5.76078	4.48554	4.18831	6.85206
ENSG00000150556.16_3	LYPD6B	chr2:149894621-150071776	+	protein_coding	1.24678	2.37311	0.00211052	0.0208131	1.29628	0.0495013	0.0295015	0.11424	0	0	1.21374	2.15722	2.23771	0.607709
ENSG00000124571.17_3	XPO5	chr6:43490068-43543812	-	protein_coding	1.24663	2.37287	1.40679e-05	0.00296953	2.76452	1.51789	1.96727	1.80639	2.00539	1.68729	6.30967	4.68012	5.86522	6.48007
ENSG00000104856.13_2	RELB	chr19:45504688-45541456	+	protein_coding	1.24573	2.37139	0.0428656	0.116525	3.69933	2.4536	10.342	3.15636	4.0585	2.77573	7.67283	11.0263	10.0146	23.7841
ENSG00000141401.11_2	IMPA2	chr18:11981024-12030882	+	protein_coding	1.24543	2.37089	5.83743e-05	0.0050849	3.04617	1.80075	3.08878	2.76332	2.04729	2.14221	7.55312	8.34541	6.75651	6.50876
ENSG00000100890.15_3	KIAA0391	chr14:35591052-35746820	+	protein_coding	1.24532	2.37071	0.000456963	0.00999892	2.76043	1.51511	1.07948	2.62397	1.84657	2.1111	5.0846	6.20754	5.54904	6.33985
ENSG00000243364.7_3	EFNA4	chr1:155036207-155042029	+	protein_coding	1.24522	2.37055	9.20126e-05	0.00562156	2.04604	0.80082	1.22396	0.64792	0.448046	0.735547	3.15277	3.43673	2.9387	3.00798
ENSG00000128283.6_4	CDC42EP1	chr22:37956454-37965412	+	protein_coding	1.24493	2.37008	0.0106079	0.0492712	2.77551	1.53058	4.42323	1.66312	1.3578	1.0457	5.65231	6.47986	4.35235	7.25344
ENSG00000125449.6_2	ARMC7	chr17:73106047-73126360	+	protein_coding	1.24477	2.3698	0.0112543	0.0508818	2.16225	0.917487	0.660459	0.643502	1.76824	0.684854	6.54209	4.00241	2.44776	2.08605
ENSG00000033100.16_3	CHPF2	chr7:150929575-150935913	+	protein_coding	1.24431	2.36905	0.0121196	0.0534127	2.66561	1.4213	3.51559	1.83899	1.24221	0.790047	5.76828	3.19578	6.86833	6.25346
ENSG00000136930.12_2	PSMB7	chr9:127115745-127177723	-	protein_coding	1.24412	2.36875	2.91008e-05	0.00411202	4.82708	3.58296	11.6476	9.66701	10.6356	12.1362	24.9187	26.1991	32.9683	26.1108
ENSG00000086062.12_2	B4GALT1	chr9:33104080-33167354	-	protein_coding	1.24386	2.36832	0.00766917	0.0408953	4.54576	3.3019	15.7288	7.48739	7.27219	7.05428	21.5912	31.4354	16.2068	22.6041
ENSG00000181789.14_2	COPG1	chr3:128968449-128996616	+	protein_coding	1.24173	2.36481	0.000170806	0.00705126	4.50598	3.26425	11.1778	9.48959	6.71299	7.64968	22.0557	21.9542	20.187	22.7699
ENSG00000176142.12_3	TMEM39A	chr3:119148347-119187677	-	protein_coding	1.24119	2.36394	0.000872862	0.0133131	3.05358	1.81239	4.01019	2.44969	1.60882	2.37488	7.80951	7.10619	6.45321	7.92832
ENSG00000153815.16_3	CMIP	chr16:81478775-81745367	+	protein_coding	1.24097	2.36357	0.014253	0.0586081	2.90496	1.66399	4.55742	2.35675	1.38228	1.26915	6.96236	4.86612	9.98536	5.13361
ENSG00000197279.3_2	ZNF165	chr6:28048753-28057341	+	protein_coding	1.24051	2.36282	0.0174881	0.0664034	2.20361	0.963105	1.25382	1.11512	0.673419	0.810658	2.73386	8.68753	2.03655	3.09887
ENSG00000154920.14_3	EME1	chr17:48450581-48458844	+	protein_coding	1.23996	2.36191	0.0035674	0.0269836	1.45124	0.211286	0.226939	0.0982992	0.150635	0.158598	1.90884	3.42101	1.33247	0.863859
ENSG00000279739.1_4	AC011369.2	chr5:167555861-167557427	+	TEC	1.23753	2.35795	0.0461922	0.122183	1.44346	0.205922	0.416325	0.114685	0.063501	0.05415	0.599165	1.04566	6.24095	1.30978
ENSG00000269924.1_4	AC024451.4	chr8:48439959-48440710	+	sense_intronic	1.23705	2.35715	0.00159361	0.0181738	3.0818	1.84475	3.19124	2.78179	3.01937	1.61278	9.97977	5.85837	6.12278	8.5805
ENSG00000007968.6_2	E2F2	chr1:23832922-23857712	-	protein_coding	1.23686	2.35685	0.0049738	0.0320853	1.37771	0.140852	0.316596	0.105221	0	0.0155492	1.31021	1.88844	0.67199	3.0868
ENSG00000141736.13_3	ERBB2	chr17:37844167-37886679	+	protein_coding	1.23665	2.35651	0.00860847	0.0435943	3.23957	2.00292	3.82511	3.47767	2.34681	2.56916	9.69175	7.928	4.57733	13.9487
ENSG00000260401.1_3	AP002761.4	chr11:72950020-72953380	+	sense_overlapping	1.23649	2.35624	0.000327228	0.00891189	1.43677	0.200285	0.353953	0.225792	0	0.049898	1.1592	1.84144	2.38236	1.58817
ENSG00000059378.12_2	PARP12	chr7:139723544-139763521	-	protein_coding	1.2363	2.35594	0.0491275	0.12702	3.30022	2.06392	5.69973	2.79501	2.35576	2.58213	6.19382	3.83567	17.2336	13.8447
ENSG00000171960.10_3	PPIH	chr1:43124096-43142429	+	protein_coding	1.23616	2.35571	0.00185813	0.0194546	3.26604	2.02988	4.20964	3.00389	1.92051	3.56533	8.09385	11.589	6.60818	8.83299
ENSG00000166557.12_3	TMED3	chr15:79603404-79719774	+	protein_coding	1.23555	2.3547	5.83926e-05	0.0050849	2.10355	0.868	1.0736	0.99945	0.647348	0.624633	3.11027	3.83947	2.73996	3.5855
ENSG00000120526.10_2	NUDCD1	chr8:110253148-110346614	-	protein_coding	1.23538	2.35443	0.000227724	0.00780108	3.43767	2.20229	4.28035	3.56578	3.12155	3.51416	9.02153	12.9937	10.071	7.87785
ENSG00000181458.10_2	TMEM45A	chr3:100211463-100296288	+	protein_coding	1.23464	2.35322	0.00165975	0.0185314	1.64721	0.41257	0.392517	0.406238	0.304963	0.228362	1.06402	3.22563	2.01633	2.65892
ENSG00000001084.10_3	GCLC	chr6:53362139-53481768	-	protein_coding	1.23436	2.35278	0.0270979	0.0876002	3.51069	2.27633	3.39974	3.80667	3.69871	4.54274	26.1109	7.26101	8.26892	7.12999
ENSG00000132432.13_2	SEC61G	chr7:54819943-54827667	-	protein_coding	1.23403	2.35222	0.00134143	0.0165918	5.11765	3.88362	16.155	13.1879	12.1198	13.8631	25.9042	48.6736	27.62	36.9879
ENSG00000260574.1_3	AL360157.1	chr6:82679170-82679256	-	lincRNA	1.23388	2.35199	0.0473262	0.124068	1.35301	0.119131	0	0.391386	0	0	3.729	2.87168	0.069036	1.17535
ENSG00000240224.1_3	UGT1A5	chr2:234621638-234681945	+	protein_coding	1.23374	2.35177	0.0184912	0.0687734	1.25051	0.0167703	0	0.047595	0	0	1.75725	3.74484	0.634899	0.49824
ENSG00000231925.11_2	TAPBP	chr6:33267471-33282164	-	protein_coding	1.23284	2.35029	0.0335187	0.0996651	4.35686	3.12402	10.4885	7.41594	6.22492	7.26981	15.6204	10.576	18.6502	45.6241
ENSG00000067167.7_2	TRAM1	chr8:71485677-71520622	-	protein_coding	1.2328	2.35023	0.0113901	0.0513221	4.58352	3.35072	15.895	8.54736	6.67418	7.74967	25.6675	33.2075	14.8063	21.9177
ENSG00000125637.15_3	PSD4	chr2:113914902-113966973	+	protein_coding	1.23239	2.34956	0.0112342	0.0508528	2.03367	0.801279	2.02174	0.639581	0.297761	0.434339	1.81258	3.19425	4.59387	3.25905
ENSG00000162769.12_2	FLVCR1	chr1:213031597-213072705	+	protein_coding	1.23159	2.34826	0.0124251	0.0540986	2.33267	1.10107	1.25769	1.34317	0.998519	1.00285	2.96167	8.76968	2.27032	4.08701
ENSG00000115233.11_3	PSMD14	chr2:162164549-162268228	+	protein_coding	1.23159	2.34826	0.00196438	0.020015	4.18098	2.94939	5.58449	7.84002	6.8266	6.81391	13.4959	27.1787	14.254	16.3722
ENSG00000101752.11_2	MIB1	chr18:19284918-19450918	+	protein_coding	1.23126	2.34771	0.0320557	0.096925	4.82906	3.59781	10.378	11.7763	10.5952	11.748	18.8765	27.9143	16.0133	65.7618
ENSG00000164045.11_3	CDC25A	chr3:48198636-48229892	-	protein_coding	1.23111	2.34748	0.00095464	0.0140423	1.41294	0.181834	0.110913	0.281971	0	0.162496	1.19174	2.59455	1.07766	2.07147
ENSG00000124802.11_3	EEF1E1	chr6:8073593-8102811	-	protein_coding	1.22985	2.34543	0.00294935	0.0245639	2.37819	1.14834	1.49135	1.21169	0.847641	1.37116	4.65916	5.54705	2.20057	5.16029
ENSG00000270157.1_4	AC004918.3	chr7:141362722-141363646	-	sense_intronic	1.22926	2.34447	0.0111395	0.05058	2.43064	1.20137	1.17462	2.00793	0.508797	1.83344	6.00711	2.2308	5.49313	4.74744
ENSG00000136235.15_3	GPNMB	chr7:23275586-23314727	+	protein_coding	1.2292	2.34437	0.019103	0.0702546	4.79411	3.56491	20.2846	8.85208	7.80987	9.61744	39.1596	16.2114	25.8893	30.879
ENSG00000143621.16_2	ILF2	chr1:153634264-153643524	-	protein_coding	1.22902	2.34408	0.0100008	0.047629	5.16119	3.93217	21.1044	12.8902	9.11967	16.4761	26.9388	49.1864	25.7495	42.7098
ENSG00000101224.17_3	CDC25B	chr20:3767419-3786768	+	protein_coding	1.22886	2.34382	0.0171492	0.0655247	3.79207	2.56321	4.74403	6.46781	3.92172	4.77935	5.9032	20.2247	16.6812	13.2135
ENSG00000196876.9	SCN8A	chr12:51984050-52206648	+	protein_coding	1.22866	2.3435	0.000255062	0.00814223	1.48042	0.251755	0.115608	0.22165	0.192479	0.236613	1.4934	1.93592	1.24312	2.69157
ENSG00000162695.11_3	SLC30A7	chr1:101361632-101447309	+	protein_coding	1.22775	2.34202	0.000231244	0.00781583	3.11027	1.88252	3.91071	2.39041	1.94874	2.76481	7.99268	7.6745	7.43596	7.45029
ENSG00000130748.6_2	TMEM160	chr19:47549165-47551888	-	protein_coding	1.22629	2.33965	0.000340626	0.00900887	3.74261	2.51631	6.06819	4.89854	3.88656	4.25882	15.4943	10.3931	10.9855	13.2533
ENSG00000254726.2_2	MEX3A	chr1:156041804-156051789	-	protein_coding	1.22534	2.33811	0.00514615	0.0326375	1.87818	0.652837	0.414341	0.902192	0.370984	0.656734	3.57635	2.72569	1.1855	3.90087
ENSG00000137168.7_2	PPIL1	chr6:36822603-36842800	-	protein_coding	1.22521	2.3379	0.000997742	0.0143613	3.64643	2.42122	2.99524	6.02358	4.51267	4.32074	11.2064	13.3156	8.99255	13.082
ENSG00000185963.13_2	BICD2	chr9:95473645-95527094	-	protein_coding	1.22478	2.33719	0.0391833	0.110294	5.44995	4.22517	14.422	19.2142	19.3161	18.3186	57.8876	22.7684	91.0094	27.3488
ENSG00000269365.1	RP11-380M21.4	chr18:45404666-45408815	-	sense_intronic	1.22438	2.33655	0.000166763	0.00695097	1.94431	0.719934	0.843338	0.430376	0.825516	0.529134	2.03613	3.01671	3.20885	3.27399
ENSG00000135763.9_2	URB2	chr1:229761981-229795946	+	protein_coding	1.22384	2.33567	0.00422091	0.029364	2.1835	0.959667	0.871295	1.18863	0.85996	0.878174	2.60674	6.68259	2.40276	3.5159
ENSG00000165724.5_2	ZMYND19	chr9:140476531-140484942	-	protein_coding	1.2225	2.33351	0.00194889	0.0199299	3.01718	1.79468	2.56989	2.07173	2.01222	3.38616	8.07314	6.1821	10.1088	4.93431
ENSG00000008283.15_3	CYB561	chr17:61509665-61523739	-	protein_coding	1.22237	2.3333	0.00248182	0.0226266	2.30618	1.08381	1.45233	1.40157	0.89626	0.807446	4.44401	6.25435	2.9755	2.81078
ENSG00000100567.12_3	PSMA3	chr14:58711549-58738730	+	protein_coding	1.22175	2.3323	0.000164104	0.00690192	4.66108	3.43932	11.0246	9.74793	8.92926	9.79057	21.6017	29.5965	19.6502	27.692
ENSG00000013810.18_3	TACC3	chr4:1723217-1746903	+	protein_coding	1.2212	2.3314	0.0224931	0.0777632	2.85181	1.63062	5.57793	1.91461	1.25369	1.12762	5.07401	7.61199	5.15363	7.43755
ENSG00000159322.17_2	ADPGK	chr15:73043710-73078187	-	protein_coding	1.22116	2.33134	0.00948339	0.0460884	3.43142	2.21026	7.0605	3.69771	2.72176	2.254	8.13604	7.89716	12.2961	11.5344
ENSG00000059573.8_2	ALDH18A1	chr10:97365686-97416463	-	protein_coding	1.22014	2.32969	0.00206661	0.0205543	3.06509	1.84495	3.36711	3.04227	1.87046	2.28681	7.43251	10.2057	4.89733	7.80405
ENSG00000241322.4	CDRT1	chr17:15468798-15522826	-	protein_coding	1.22008	2.3296	0.0149739	0.0603787	1.57783	0.357753	0.478473	0.247984	0.259304	0.160445	1.24155	2.67128	4.35903	0.800725
ENSG00000133678.13_3	TMEM254	chr10:81838402-81852313	+	protein_coding	1.21978	2.32911	0.00231186	0.0217985	2.40788	1.1881	1.28777	1.79188	1.33138	0.810033	5.60946	2.6251	4.05229	5.55235
ENSG00000014216.15_4	CAPN1	chr11:64948037-64979477	+	protein_coding	1.219	2.32785	0.000430693	0.00983343	3.75189	2.53288	5.6667	5.20421	3.92667	4.50486	14.7918	13.4689	9.01498	13.3947
ENSG00000132749.10_3	TESMIN	chr11:68474908-68519032	-	protein_coding	1.21879	2.32752	0.0133532	0.0563836	1.35541	0.136619	0.240439	0.0671865	0.0170593	0.0847852	0.656732	1.57055	1.01793	3.98764
ENSG00000182197.10_3	EXT1	chr8:118806729-119124092	-	protein_coding	1.21852	2.32708	0.00127919	0.0162531	3.44637	2.22785	5.44532	3.60355	3.22724	2.83889	12.4163	7.65482	11.0624	9.08151
ENSG00000261716.1_3	AC239868.2	chr1:149816065-149820591	-	sense_overlapping	1.21847	2.327	0.0175581	0.066553	2.24591	1.02744	1.25006	0.884493	0.803296	1.25793	3.76347	8.6809	2.15784	2.47633
ENSG00000109929.9_2	SC5D	chr11:121163162-121179403	+	protein_coding	1.21747	2.32539	0.000591429	0.0111956	2.59195	1.37448	1.99095	1.47309	1.31598	1.63788	5.96414	6.53597	4.5951	3.49991
ENSG00000167700.8_2	MFSD3	chr8:145734457-145736596	+	protein_coding	1.2173	2.32511	0.00093479	0.0138765	1.397	0.179702	0.165373	0.143166	0.0883709	0.135094	2.90904	1.14101	1.61788	1.19542
ENSG00000084090.13_3	STARD7	chr2:96850597-96874563	-	protein_coding	1.21624	2.3234	0.000271956	0.00827246	5.30564	4.0894	17.5633	17.4116	14.1482	15.2188	44.0034	46.654	29.7864	36.0614
ENSG00000147650.11_3	LRP12	chr8:105501459-105601252	-	protein_coding	1.21454	2.32068	0.0119855	0.0530618	2.86806	1.65351	1.76812	2.18756	2.27561	2.38918	3.27772	11.4474	7.90456	4.99217
ENSG00000280164.1_3	CU638689.5	GL000195.1:83300-86697	-	lincRNA	1.2144	2.32045	0.00587077	0.0351696	2.06467	0.850271	1.35361	1.30252	0.278801	0.524361	4.08481	4.35617	2.65396	2.07768
ENSG00000139645.9_2	ANKRD52	chr12:56631591-56652175	-	protein_coding	1.21398	2.31976	0.00628118	0.0364679	2.5112	1.29723	1.14003	1.59513	0.884846	2.48466	3.74286	7.9211	3.52997	4.51104
ENSG00000137460.8_2	FHDC1	chr4:153857504-153900848	+	protein_coding	1.21352	2.31903	0.0232918	0.07942	2.14413	0.930606	1.6641	1.04659	0.602543	0.510672	3.01698	7.55787	1.60251	3.26705
ENSG00000170545.16_2	SMAGP	chr12:51638342-51664674	-	protein_coding	1.21351	2.319	0.0345045	0.101517	1.69565	0.482149	0.638298	0.733184	0.113778	0.20373	2.81214	2.2184	0.497824	4.99104
ENSG00000106853.18_3	PTGR1	chr9:114312002-114362135	-	protein_coding	1.21325	2.31859	0.0270159	0.0874852	4.8412	3.62795	12.0081	11.7308	10.6749	11.0828	21.4764	29.4895	60.7588	14.9519
ENSG00000249915.7_3	PDCD6	chr5:271736-353971	+	protein_coding	1.21284	2.31793	0.00321434	0.0255768	2.97252	1.75968	3.03198	2.63876	1.68128	2.34238	9.28996	5.1502	4.86192	9.23133
ENSG00000166526.16_3	ZNF3	chr7:99661656-99680171	-	protein_coding	1.21245	2.31731	0.00245579	0.0225099	2.21056	0.998111	0.820964	0.817238	0.97374	1.43692	4.08355	2.64417	2.61244	5.8583
ENSG00000124767.6_2	GLO1	chr6:38643701-38670917	-	protein_coding	1.21221	2.31692	0.00420924	0.029331	4.72576	3.51355	15.1177	7.18427	7.52065	14.1349	22.2269	28.3376	25.8767	25.7662
ENSG00000102158.19_2	MAGT1	chrX:77081861-77151090	-	protein_coding	1.21204	2.31665	0.0111323	0.0505758	3.08362	1.87158	3.54477	4.39451	1.37015	2.08576	7.99218	9.89808	4.6981	8.24912
ENSG00000170921.15_3	TANC2	chr17:61086917-61505060	+	protein_coding	1.21154	2.31585	0.00405743	0.0286849	2.58222	1.37068	1.55601	1.99419	1.37067	1.46464	4.80714	4.57867	8.70587	3.09052
ENSG00000172575.11_2	RASGRP1	chr15:38780304-38857776	-	protein_coding	1.21137	2.31558	0.0262055	0.0857987	1.64588	0.434507	0.55119	0.297476	0.249173	0.326819	3.27418	0.819467	1.08975	4.90125
ENSG00000278192.1_3	AL118505.1	chr20:6046612-6048543	-	lincRNA	1.21081	2.31468	0.00792035	0.0415621	1.27761	0.0667951	0.117172	0.024805	0.051158	0	1.99467	0.707234	2.99555	0.691122
ENSG00000259240.1_3	MIR4713HG	chr15:51329685-51586109	+	lincRNA	1.2104	2.31403	0.0466368	0.122938	1.2104	0	0	0	0	0	1.21691	0.101801	4.62857	1.08556
ENSG00000054654.16_3	SYNE2	chr14:64319701-64693151	+	protein_coding	1.21026	2.3138	0.0142572	0.0586081	5.7554	4.54513	32.4308	22.0503	18.1927	19.0875	66.0102	27.8733	70.5492	60.51
ENSG00000177570.13_2	SAMD12	chr8:119201698-119634234	-	protein_coding	1.20989	2.31321	0.0135366	0.0568364	2.1317	0.921809	0.678987	1.32096	0.740741	0.898976	6.21988	1.86708	4.84387	2.04899
ENSG00000135211.5_2	TMEM60	chr7:77423045-77427897	-	protein_coding	1.20911	2.31196	0.00628032	0.0364679	2.58518	1.37607	3.00214	1.33541	1.10599	1.30591	6.90506	6.12407	3.18798	4.49836
ENSG00000196743.8_3	GM2A	chr5:150591711-150650001	+	protein_coding	1.20811	2.31035	0.0111094	0.0504923	4.20692	2.99881	9.46919	6.99225	5.34785	6.68624	21.7008	8.9622	23.0666	20.3708
ENSG00000145040.3_3	UCN2	chr3:48599160-48601206	-	protein_coding	1.20745	2.30929	0.00305716	0.0248923	1.20745	0	0	0	0	0	0.957627	0.640928	2.70042	1.39244
ENSG00000198142.4_3	SOWAHC	chr2:110371911-110376567	+	protein_coding	1.20681	2.30826	0.00265019	0.0233831	3.96923	2.76243	4.01648	6.86393	5.06783	7.85569	15.372	12.4582	20.1003	11.9437
ENSG00000176842.14_3	IRX5	chr16:54964774-54968397	+	protein_coding	1.2067	2.3081	0.0039131	0.0281617	1.29949	0.0927866	0.0138976	0.240037	0	0.0287209	1.66532	0.599219	1.29328	2.75515
ENSG00000172175.12_3	MALT1	chr18:56338618-56421709	+	protein_coding	1.20661	2.30795	0.0234573	0.0797654	3.66327	2.45666	7.5116	4.03611	3.10908	4.15538	5.993	17.8951	10.1401	16.5031
ENSG00000060982.14_2	BCAT1	chr12:24962956-25102393	-	protein_coding	1.2058	2.30665	0.0221278	0.0771718	3.62165	2.41585	7.70507	4.40481	3.0951	3.20877	19.7141	12.3855	9.92118	6.58101
ENSG00000163006.11_4	CCDC138	chr2:109403213-109501933	+	protein_coding	1.20511	2.30555	0.000233928	0.00785907	2.26785	1.06274	1.28232	1.0248	1.02972	1.02989	4.29274	5.06961	2.79149	3.41683
ENSG00000147813.15_2	NAPRT	chr8:144656955-144660819	-	protein_coding	1.204	2.30378	0.00530035	0.0331272	2.57488	1.37088	2.64069	1.37257	1.20929	1.34448	7.50518	3.77219	3.3795	6.08993
ENSG00000234741.7_3	GAS5	chr1:173833038-173838020	-	processed_transcript	1.20397	2.30373	0.000766974	0.0125538	3.91246	2.70849	8.23343	5.11891	4.29058	5.10667	16.4209	14.6335	12.9223	12.5592
ENSG00000265479.6_3	DTX2P1-UPK3BP1-PMS2P11	chr7:76589152-76673092	+	processed_transcript	1.20366	2.30323	0.0445324	0.119459	3.26493	2.06128	2.77945	3.58498	3.25904	3.11101	21.1449	3.53007	7.40663	9.12446
ENSG00000008018.8_2	PSMB1	chr6:170844205-170862429	-	protein_coding	1.20242	2.30125	0.000188953	0.00728194	5.16607	3.96365	17.9196	13.6619	12.1938	15.1896	32.4304	37.5234	29.8533	40.8215
ENSG00000095002.13_3	MSH2	chr2:47630108-47789450	+	protein_coding	1.20166	2.30004	0.00270415	0.0235893	3.69296	2.4913	4.02272	6.21564	3.73087	4.83001	12.0532	14.4276	7.64692	15.0652
ENSG00000147383.10_4	NSDHL	chrX:151999511-152038273	+	protein_coding	1.20134	2.29954	0.000471707	0.0100238	3.0161	1.81476	2.21236	2.66922	2.27897	2.96324	6.43493	8.56989	5.14533	8.79533
ENSG00000167130.17_3	DOLPP1	chr9:131843379-131852717	+	protein_coding	1.20131	2.29948	0.000867347	0.0132742	2.30112	1.09982	1.13531	0.832859	1.03825	1.64524	5.17109	4.18817	4.09948	2.61349
ENSG00000204604.9_3	ZNF468	chr19:53341261-53360902	-	protein_coding	1.19964	2.29682	0.00430404	0.0296466	2.25885	1.05921	1.64486	1.08022	0.534503	1.23322	5.72434	4.10651	2.28291	3.65467
ENSG00000121579.12_3	NAA50	chr3:113435307-113465147	-	protein_coding	1.19896	2.29574	0.000241428	0.00796747	4.69286	3.49389	7.92194	10.1489	11.866	11.5873	26.7465	24.332	20.6561	28.3971
ENSG00000010244.18_3	ZNF207	chr17:30677136-30708905	+	protein_coding	1.19895	2.29573	0.00163112	0.0183768	3.68165	2.4827	3.63092	6.12839	6.23227	3.08824	13.4447	11.3246	11.9441	10.7652
ENSG00000213983.11_3	AP1G2	chr14:24028774-24037279	-	protein_coding	1.19835	2.29477	0.000117535	0.00605954	2.20475	1.00641	1.5842	1.04892	0.736807	0.771066	3.55446	3.36447	3.79168	3.74169
ENSG00000127129.9_2	EDN2	chr1:41944446-41950344	-	protein_coding	1.19835	2.29476	0.0287266	0.0907977	1.28662	0.0882789	0.0644192	0	0.200012	0	1.33322	0.746733	4.55622	0.564188
ENSG00000131019.10_2	ULBP3	chr6:150384286-150390231	-	protein_coding	1.1975	2.29342	0.00653345	0.0373179	1.60945	0.411953	0.34408	0.207104	0.500186	0.287438	1.15777	4.11821	2.38028	1.32218
ENSG00000133393.12_2	FOPNL	chr16:15959577-15982482	-	protein_coding	1.19618	2.29131	0.00597861	0.035508	4.56226	3.36608	10.7597	11.2005	4.78318	12.6214	25.6301	22.0478	21.0541	22.015
ENSG00000090520.11_3	DNAJB11	chr3:186285192-186303589	+	protein_coding	1.19529	2.28991	0.00410154	0.028841	4.60209	3.40679	10.7236	11.0403	9.76511	7.32669	20.473	34.5707	15.5783	26.4752
ENSG00000152256.13_4	PDK1	chr2:173420101-173473397	+	protein_coding	1.19463	2.28886	0.0109644	0.0501283	2.11511	0.92048	0.754095	1.05366	0.888682	0.886375	1.70322	2.76567	6.95843	3.34802
ENSG00000143321.18_2	HDGF	chr1:156711899-156736717	-	protein_coding	1.1943	2.28834	0.00786815	0.0414235	5.78646	4.59216	20.8701	26.6111	22.459	22.893	45.8402	100.287	39.5776	47.2101
ENSG00000006831.9_2	ADIPOR2	chr12:1797740-1897844	+	protein_coding	1.19381	2.28756	0.00388925	0.0280897	3.9348	2.74099	9.22886	5.11901	4.73492	4.5648	11.6103	17.9977	11.5941	17.1293
ENSG00000148834.12_3	GSTO1	chr10:105995114-106027217	+	protein_coding	1.19361	2.28724	0.00447578	0.0302205	4.5839	3.39029	14.6272	8.53039	7.08663	9.03599	20.1641	17.2046	30.5601	26.2049
ENSG00000178860.8_2	MSC	chr8:72753784-72756703	-	protein_coding	1.19348	2.28704	0.0361537	0.104789	2.78145	1.58796	3.18286	2.47198	1.49474	1.25436	2.71146	10.6377	4.13149	9.08184
ENSG00000152894.14_4	PTPRK	chr6:128289924-128841819	-	protein_coding	1.1932	2.2866	0.00253456	0.0228672	4.05724	2.86404	3.75205	6.99954	6.86855	8.39298	17.8884	15.2766	17.4863	12.5144
ENSG00000142235.8_2	LMTK3	chr19:48988528-49016446	-	protein_coding	1.19261	2.28565	0.000205401	0.00752104	1.34186	0.149259	0.179963	0.0704699	0.102076	0.0866041	2.32195	1.11316	1.62752	1.23818
ENSG00000100644.16_3	HIF1A	chr14:62162231-62214977	+	protein_coding	1.19212	2.28489	0.017599	0.0666515	5.68714	4.49501	43.8016	16.2951	19.6401	15.1662	43.7034	63.7151	56.0999	41.6592
ENSG00000154124.4_2	OTULIN	chr5:14664773-14699820	+	protein_coding	1.19102	2.28314	0.000568705	0.0109602	3.73507	2.54405	5.60622	5.09729	4.66258	4.07266	12.6961	8.72724	13.4161	15.3694
ENSG00000134049.5_3	IER3IP1	chr18:44679205-44702745	-	protein_coding	1.19089	2.28294	0.0030759	0.0249812	3.6395	2.44861	4.43526	4.44542	3.86146	5.17167	10.2896	19.0495	8.26969	10.4961
ENSG00000104611.11_3	SH2D4A	chr8:19171128-19253729	+	protein_coding	1.19086	2.28288	0.00608932	0.0359042	3.49147	2.30061	3.96429	5.25435	2.97323	3.77558	9.88301	14.9322	5.99597	12.1908
ENSG00000148600.14_3	CDHR1	chr10:85954391-85979377	+	protein_coding	1.18966	2.28099	0.0362431	0.104976	1.27348	0.0838218	0.127111	0.0366377	0.0510925	0.027299	2.22567	0.0212785	3.17794	1.4814
ENSG00000281404.1_3	LINC01176	chr7:30430501-30451991	+	lincRNA	1.18892	2.27983	0.00112733	0.0152687	3.04088	1.85196	3.38795	3.56145	1.86729	1.95899	6.33836	6.39938	8.70887	7.7021
ENSG00000160563.13_2	MED27	chr9:134735494-134955295	-	protein_coding	1.18841	2.27902	0.000108046	0.0059213	2.38139	1.19297	1.1677	1.28762	1.19222	1.51313	4.1886	5.63185	3.76095	3.49881
ENSG00000156599.10_2	ZDHHC5	chr11:57435219-57468659	+	protein_coding	1.1884	2.27901	0.000361016	0.00911052	4.3459	3.1575	9.60404	7.18137	7.27312	7.8316	24.6706	21.1386	16.8279	15.8772
ENSG00000133983.14_3	COX16	chr14:70791798-70826448	-	protein_coding	1.18837	2.27896	0.00265064	0.0233831	3.86278	2.67441	8.24735	5.20341	4.17359	4.59592	14.7345	17.8173	10.5615	12.0867
ENSG00000185101.12_2	ANO9	chr11:417933-442011	-	protein_coding	1.18835	2.27892	1.96566e-05	0.00349061	1.26496	0.0766113	0	0.131898	0.0513937	0.0391463	1.2848	1.3207	1.17572	1.8913
ENSG00000138496.16_2	PARP9	chr3:122246771-122283424	-	protein_coding	1.18834	2.27891	0.0279698	0.089187	4.29438	3.10603	12.5423	8.29295	4.96807	6.31741	15.1479	10.7715	22.4804	32.212
ENSG00000103222.18_2	ABCC1	chr16:16043434-16236931	+	protein_coding	1.1883	2.27885	0.00393187	0.028223	4.52805	3.33975	6.00049	10.5883	8.60844	12.479	25.9044	16.8363	27.9228	19.4152
ENSG00000129534.13_3	MIS18BP1	chr14:45672393-45722743	-	protein_coding	1.188	2.27837	0.000494153	0.0101947	4.1443	2.9563	9.36968	6.45424	5.9656	5.73923	17.2925	18.5068	13.3935	18.0372
ENSG00000145494.11_2	NDUFS6	chr5:1801514-1816719	+	protein_coding	1.1879	2.27821	0.00232911	0.0218782	4.51275	3.32485	10.5619	9.00768	7.05622	9.81483	23.7052	29.2112	14.3294	22.7358
ENSG00000247077.6_3	PGAM5	chr12:133287405-133299320	+	protein_coding	1.18714	2.27701	0.000282595	0.00834897	2.62422	1.43708	1.44881	2.18915	1.29065	2.00486	4.60918	6.70784	4.84174	4.72136
ENSG00000110427.14_3	KIAA1549L	chr11:33563618-33695648	+	protein_coding	1.18703	2.27683	0.000601604	0.0112421	1.37694	0.189909	0.201828	0.147859	0.152786	0.0646186	0.923414	1.70356	2.49449	1.50384
ENSG00000133731.9_2	IMPA1	chr8:82570196-82598928	-	protein_coding	1.18626	2.27562	0.01536	0.0612622	3.1081	1.92184	2.75918	3.12269	2.58606	2.7088	9.35098	14.0671	3.80643	6.37377
ENSG00000117676.13_3	RPS6KA1	chr1:26856252-26901521	+	protein_coding	1.18603	2.27526	0.0192906	0.0707236	2.19426	1.00823	3.17149	0.869171	0.294541	0.621695	3.04688	3.77304	3.46898	4.08188
ENSG00000121064.12_3	SCPEP1	chr17:55055466-55084129	+	protein_coding	1.18588	2.27502	0.0499403	0.128174	4.2272	3.04132	13.2978	6.27564	5.14099	6.19009	15.7464	33.0692	8.18638	22.4761
ENSG00000118557.15_4	PMFBP1	chr16:72146056-72210777	-	protein_coding	1.18566	2.27468	0.0118012	0.0525687	1.46569	0.280024	0.197402	0.217006	0.297058	0.14998	4.0448	0.66148	1.7427	1.5313
ENSG00000097021.19_2	ACOT7	chr1:6324329-6454451	-	protein_coding	1.18548	2.27439	0.0102522	0.0482727	3.1293	1.94383	1.70616	3.90608	3.45601	2.70311	5.05613	12.6635	8.90855	6.14972
ENSG00000149948.13_3	HMGA2	chr12:66217911-66360075	+	protein_coding	1.18497	2.27358	0.00582369	0.0350126	1.27516	0.0901955	0.117907	0.0924122	0.0358907	0.0150797	2.41467	2.14328	0.450621	1.20374
ENSG00000180596.7_2	HIST1H2BC	chr6:26115101-26124154	-	protein_coding	1.18477	2.27327	0.00957663	0.0463703	5.6044	4.41963	22.9859	20.2996	17.0912	21.6973	42.5583	56.9946	27.7451	76.1531
ENSG00000188612.11_3	SUMO2	chr17:73161681-73179078	-	protein_coding	1.18228	2.26935	0.00397121	0.0283429	5.7517	4.56941	28.3386	19.8322	18.9606	25.0479	54.1215	81.0626	38.4589	46.2193
ENSG00000123131.12_2	PRDX4	chrX:23682379-23704516	+	protein_coding	1.18204	2.26897	0.00580356	0.034942	4.33945	3.15741	10.4657	6.91084	7.28289	7.43522	16.6007	33.3484	15.6772	15.6593
ENSG00000163840.9_2	DTX3L	chr3:122283085-122294050	+	protein_coding	1.18193	2.26881	0.0071763	0.0392495	5.36696	4.18503	23.9978	17.0916	13.1993	16.0463	30.3299	29.9408	48.392	59.5788
ENSG00000013016.15_3	EHD3	chr2:31457203-31492313	+	protein_coding	1.18178	2.26856	0.00906795	0.044902	3.22297	2.04119	2.48732	5.11564	2.68386	2.65261	10.0808	5.29173	7.01814	12.5965
ENSG00000115687.13_2	PASK	chr2:242045514-242089679	-	protein_coding	1.18119	2.26765	0.000216552	0.00763727	1.73779	0.556595	0.575576	0.470907	0.453392	0.38931	2.3729	2.42232	1.56555	3.17833
ENSG00000146731.10_2	CCT6A	chr7:56119323-56131682	+	protein_coding	1.1803	2.26624	0.0012954	0.0163477	5.81337	4.63307	21.5649	25.8744	23.2848	24.7437	43.8806	81.9545	46.2205	55.8811
ENSG00000113569.15_2	NUP155	chr5:37288239-37371283	-	protein_coding	1.1802	2.26609	6.34183e-05	0.00515164	3.26752	2.08732	2.94061	3.70988	3.1477	3.23643	9.20057	10.4045	7.05803	8.17401
ENSG00000134294.13_2	SLC38A2	chr12:46751972-46766650	-	protein_coding	1.17987	2.26556	0.00236062	0.0220024	5.65677	4.47691	25.0025	20.9228	24.0825	16.197	54.4101	52.1919	62.732	33.4859
ENSG00000080839.11_3	RBL1	chr20:35624752-35724398	-	protein_coding	1.17938	2.26479	0.00401553	0.0285139	3.15883	1.97946	3.91164	2.73987	2.45989	2.80502	5.61655	10.398	5.85045	11.3151
ENSG00000132003.9_3	ZSWIM4	chr19:13906274-13943044	+	protein_coding	1.17916	2.26445	0.00169562	0.0186894	2.12908	0.949921	1.07893	1.32082	0.854879	0.556047	3.95221	3.10795	2.17436	4.67004
ENSG00000165527.6_3	ARF6	chr14:50359810-50363772	+	protein_coding	1.17915	2.26443	0.00180298	0.0191647	5.10435	3.92521	19.0311	15.3954	11.1583	12.339	27.2975	31.5804	31.6522	45.5198
ENSG00000169718.17_2	DUS1L	chr17:80015382-80023763	-	protein_coding	1.17901	2.26421	0.000535692	0.0105658	2.84964	1.67063	2.99931	2.26131	1.55864	2.07789	6.73736	7.58965	5.86043	4.92089
ENSG00000250546.5_3	AC079160.1	chr4:84717589-85214565	-	processed_transcript	1.17855	2.26349	0.00244117	0.0224225	1.21511	0.0365594	0	0.0287163	0.0390521	0.0353543	2.26095	1.66857	0.516897	1.20068
ENSG00000168389.17_3	MFSD2A	chr1:40420784-40435640	+	protein_coding	1.17814	2.26285	0.0121877	0.0536495	1.63357	0.455423	1.03848	0.204969	0.329053	0.082828	1.90868	3.51345	0.915086	2.68651
ENSG00000104356.10_3	POP1	chr8:99129525-99172062	+	protein_coding	1.17811	2.26279	0.00542303	0.0335887	2.1973	1.01919	0.582361	1.83733	1.08066	0.806406	4.51796	5.04949	2.1684	3.18288
ENSG00000101294.16_3	HM13	chr20:30102231-30165726	+	protein_coding	1.17763	2.26205	0.00571374	0.0346239	2.56078	1.38315	2.86589	1.18084	1.25256	1.43738	5.35554	7.47709	3.43412	4.07316
ENSG00000251611.1_3	AC079795.1	chr4:152328703-152329987	-	lincRNA	1.1773	2.26152	0.000441776	0.00994454	1.53896	0.361665	0.192432	0.496703	0.283596	0.189844	1.83107	2.53188	2.25275	1.19223
ENSG00000135451.12_4	TROAP	chr12:49717019-49725514	+	protein_coding	1.17688	2.26087	0.00978468	0.0469711	1.25876	0.0818808	0.075927	0.13786	0.0249966	0	0.653222	2.49393	0.632907	2.4761
ENSG00000151503.12_3	NCAPD3	chr11:134020014-134095348	-	protein_coding	1.17627	2.25992	0.00307544	0.0249812	2.60916	1.43289	1.81448	1.86442	1.42242	1.72073	5.33318	7.99192	2.98768	5.10304
ENSG00000249992.1_2	TMEM158	chr3:45265958-45267770	-	protein_coding	1.1753	2.2584	0.0363131	0.105124	2.03001	0.854708	3.08607	0.501706	0.271469	0.370799	2.75688	2.0894	4.7752	3.15059
ENSG00000164024.11_1	METAP1	chr4:99916771-99983964	+	protein_coding	1.17529	2.25839	0.0100328	0.047661	3.93086	2.75556	3.87085	6.58736	5.06937	8.2723	21.3085	14.2102	8.76542	15.3277
ENSG00000165490.12_3	DDIAS	chr11:82611017-82669319	+	protein_coding	1.17524	2.2583	0.00899288	0.04471	1.2467	0.0714582	0.0857449	0.0601695	0.0264819	0.0317864	1.89423	2.77536	0.402982	1.06837
ENSG00000180658.4_3	OR2A4	chr6:132020784-132022541	-	protein_coding	1.17493	2.25781	9.32111e-05	0.00562156	1.36886	0.193933	0.231409	0.088505	0.04088	0.227116	2.2051	1.29832	1.31428	1.60978
ENSG00000275479.1_3	AC087741.2	chr17:78123426-78123597	+	lincRNA	1.17483	2.25766	0.0325945	0.0978929	1.36104	0.186215	0.473269	0.137478	0	0	1.87066	0.556472	4.3998	0.804512
ENSG00000165449.11_2	SLC16A9	chr10:61410519-61495760	-	protein_coding	1.17454	2.25721	0.0407572	0.113018	1.94285	0.768309	0.282955	1.07543	0.73733	0.819422	4.95116	2.5229	0.718874	5.06288
ENSG00000111481.9_4	COPZ1	chr12:54694986-54745633	+	protein_coding	1.17434	2.2569	0.0127982	0.0550241	2.8517	1.67736	3.45102	2.56136	1.28028	1.89522	5.52322	10.241	3.67744	6.91618
ENSG00000153310.19_3	FAM49B	chr8:130851839-131029375	-	protein_coding	1.17407	2.25648	0.0421527	0.115252	3.63611	2.46204	12.765	3.95239	2.64184	2.71258	10.7744	11.8423	12.8577	10.4035
ENSG00000180233.10_3	ZNRF2	chr7:30323923-30407308	+	protein_coding	1.17364	2.25579	0.000900825	0.0135366	4.17513	3.0015	10.1428	7.01351	5.4741	6.11485	15.5466	14.9699	19.6177	18.5484
ENSG00000100099.20_2	HPS4	chr22:26839389-26879803	-	protein_coding	1.17348	2.25555	0.00185258	0.0194543	2.59042	1.41694	2.09051	1.26721	1.52321	1.87533	3.76479	5.86112	7.34204	3.82461
ENSG00000146733.13_2	PSPH	chr7:56078744-56119297	-	protein_coding	1.17273	2.25437	0.00201494	0.0202991	2.63545	1.46272	1.89308	1.85807	1.55835	1.72834	5.22177	7.73099	3.14362	5.62274
ENSG00000171858.17_2	RPS21	chr20:60962172-60963576	+	protein_coding	1.17199	2.25322	0.00248655	0.0226441	7.3431	6.17111	113.02	59.0104	54.9648	69.4103	164.191	163.747	148.411	169.916
ENSG00000184575.11_2	XPOT	chr12:64798130-64844907	+	protein_coding	1.16981	2.24982	0.00387991	0.0280676	4.49357	3.32376	10.8578	9.08722	7.61717	8.75129	25.0717	28.0628	12.8676	23.5067
ENSG00000168288.12_2	MMADHC	chr2:150426148-150444330	-	protein_coding	1.16925	2.24894	0.000479134	0.0101007	4.70704	3.5378	12.7587	9.00735	9.26073	11.8782	20.9549	31.9524	25.7371	23.0607
ENSG00000187713.6_3	TMEM203	chr9:140098534-140100090	-	protein_coding	1.16908	2.24868	5.83315e-05	0.0050849	3.34793	2.17885	3.22944	3.13052	3.4426	4.41587	10.1239	10.0141	8.87118	7.88653
ENSG00000144045.13_3	DQX1	chr2:74745258-74753463	-	protein_coding	1.16881	2.24825	1.1947e-05	0.00284377	1.19969	0.0308867	0.0619732	0.0258354	0	0	1.68745	1.07417	1.3662	1.11026
ENSG00000095585.16_2	BLNK	chr10:97951458-98031344	-	protein_coding	1.16872	2.24812	0.0396607	0.111093	2.0192	0.850479	1.08796	1.17729	0.469294	0.582459	2.60923	1.18362	2.81511	7.97961
ENSG00000276603.1_4	AL109614.1	chr20:36155044-36155462	-	sense_intronic	1.16778	2.24665	0.00216472	0.0210826	1.63041	0.462633	0.572656	0.328828	0.310252	0.317069	3.69695	2.1975	1.44697	1.50009
ENSG00000136986.9_2	DERL1	chr8:124025404-124054663	-	protein_coding	1.16757	2.24633	7.00838e-05	0.00529037	2.99917	1.8316	3.24367	2.47718	2.12243	2.48343	8.23667	6.13814	6.71822	7.03061
ENSG00000132182.11_2	NUP210	chr3:13357735-13461809	-	protein_coding	1.16733	2.24596	0.0271517	0.0876708	2.22534	1.05801	1.24829	1.31123	0.885503	0.917975	1.10849	4.92967	4.27658	6.24804
ENSG00000155959.10_2	VBP1	chrX:154425284-154468098	+	protein_coding	1.16551	2.24312	0.00314028	0.0251932	4.36318	3.19767	13.3963	7.37335	6.12908	7.24518	19.3275	19.0648	16.6774	23.8802
ENSG00000115392.11_3	FANCL	chr2:58386378-58468507	-	protein_coding	1.16441	2.24141	0.0118434	0.0527161	3.51759	2.35318	5.49632	4.49225	3.19214	3.55683	10.2227	17.6841	5.89047	10.9067
ENSG00000093000.18_3	NUP50	chr22:45559722-45583896	+	protein_coding	1.16428	2.24122	0.00673449	0.0379557	3.87386	2.70957	7.56932	6.57862	4.07528	4.55464	9.37377	19.7898	11.5075	16.1251
ENSG00000277791.4_2	PSMB3	chr17:36908989-36920484	+	protein_coding	1.16375	2.24039	0.00218617	0.0211806	4.27978	3.11603	8.99486	7.69898	6.97083	7.15307	14.5591	27.2838	14.0199	20.5366
ENSG00000256417.1_4	AC006206.2	chr12:5399646-5492819	+	lincRNA	1.1627	2.23875	0.00224804	0.0215232	1.1627	0	0	0	0	0	1.56578	2.07562	0.463311	1.17538
ENSG00000178184.15_2	PARD6G	chr18:77915115-78005429	-	protein_coding	1.16246	2.23838	0.0232111	0.079231	2.76449	1.60203	1.11444	2.55505	2.06203	2.68971	7.45461	2.39964	8.4484	6.85044
ENSG00000180900.18_3	SCRIB	chr8:144873090-144897549	-	protein_coding	1.16233	2.23818	0.000751809	0.0124329	3.90654	2.74422	5.30156	6.85366	6.09283	4.74151	18.5889	12.8782	14.8582	10.7314
ENSG00000140650.11_3	PMM2	chr16:8882680-8943188	+	protein_coding	1.16215	2.2379	0.0016499	0.0184876	2.70403	1.54188	3.00426	1.74789	1.56996	1.54195	6.97895	3.88833	5.81338	5.78438
ENSG00000172172.7_3	MRPL13	chr8:121393000-121457642	-	protein_coding	1.16176	2.23731	0.000605314	0.0112866	3.51616	2.35439	2.86727	5.11021	4.47797	4.2831	8.75393	12.9522	10.3305	10.1123
ENSG00000273096.1_4	AL021707.8	chr22:39132615-39132797	-	sense_intronic	1.16164	2.23712	0.000565204	0.0109398	1.52194	0.3603	0.288074	0.232586	0	0.710354	1.49375	1.9092	2.16066	1.96619
ENSG00000071794.15_2	HLTF	chr3:148747914-148804341	-	protein_coding	1.16045	2.23527	0.00653899	0.0373215	4.6986	3.53815	9.08736	10.9738	9.24449	13.7184	20.2911	40.9253	26.0879	17.8031
ENSG00000082898.16_2	XPO1	chr2:61704984-61765761	-	protein_coding	1.16014	2.23478	0.000953838	0.0140423	4.22282	3.06268	7.0162	8.15856	6.90871	7.39335	15.1838	25.9585	14.067	17.4916
ENSG00000180182.10_2	MED14	chrX:40507558-40595110	-	protein_coding	1.15895	2.23295	0.0219053	0.0767714	2.94877	1.78982	3.08104	2.75995	1.76997	2.36305	4.04689	14.6915	5.19041	6.24886
ENSG00000129128.12_2	SPCS3	chr4:177241115-177253396	+	protein_coding	1.15839	2.23209	0.0239369	0.0809409	4.575	3.41661	12.8077	10.541	6.99271	9.20815	18.9631	47.9845	17.8135	16.5425
ENSG00000162073.13_2	PAQR4	chr16:3019246-3023490	+	protein_coding	1.15838	2.23207	0.00179789	0.0191445	2.21373	1.05534	1.36824	0.778633	1.05337	1.15665	4.03277	5.47542	3.23019	2.35859
ENSG00000068120.14_3	COASY	chr17:40713485-40718295	+	protein_coding	1.15805	2.23156	0.00302416	0.024786	3.01227	1.85422	2.75257	3.34349	2.14258	2.3362	6.52484	11.5667	5.38088	6.02331
ENSG00000244327.1_4	AC109992.2	chr3:142184157-142191179	-	sense_overlapping	1.15684	2.22968	0.0021596	0.0210644	1.42641	0.269568	0.447063	0.199341	0.127976	0.078605	2.80759	1.51441	0.916947	1.8436
ENSG00000196363.9_2	WDR5	chr9:137000487-137025090	+	protein_coding	1.15608	2.22851	0.000814769	0.0130014	3.30827	2.15219	3.77347	3.46904	3.25789	3.29786	9.28131	12.3213	8.78825	6.18211
ENSG00000005469.11_2	CROT	chr7:86974997-87029111	+	protein_coding	1.15603	2.22843	0.0318092	0.0964145	3.30582	2.14979	2.67773	4.05998	3.44368	3.68959	20.1305	6.43879	4.83744	9.42241
ENSG00000100003.17_3	SEC14L2	chr22:30792846-30821305	+	protein_coding	1.15595	2.22831	0.0040878	0.0288045	1.67994	0.523989	0.428191	0.420396	0.52288	0.383836	1.13289	4.05287	2.18029	2.07523
ENSG00000106105.13_2	GARS	chr7:30634297-30673649	+	protein_coding	1.1558	2.22807	0.000762924	0.0125322	4.46205	3.30626	8.72457	9.45805	9.04557	8.37204	19.3411	29.6955	15.8314	21.453
ENSG00000027075.14_3	PRKCH	chr14:61654277-62017694	+	protein_coding	1.1556	2.22777	0.0122697	0.0538304	2.82149	1.66589	4.31386	2.30775	1.37039	1.43315	6.82144	4.67102	4.83429	8.64879
ENSG00000159055.3_2	MIS18A	chr21:33640530-33651380	-	protein_coding	1.15492	2.22672	0.00707152	0.0389429	2.98256	1.82764	2.46602	2.96344	2.09269	2.73648	5.53285	12.7124	4.72911	6.60434
ENSG00000117602.11_2	RCAN3	chr1:24828841-24867530	+	protein_coding	1.15472	2.22642	0.000255003	0.00814223	2.98263	1.82791	2.24097	3.44835	2.12505	2.52605	5.67627	6.71416	8.23991	7.2027
ENSG00000148154.9_2	UGCG	chr9:114659046-114697649	+	protein_coding	1.15442	2.22595	0.00159568	0.0181789	4.11283	2.95841	8.70946	5.5682	8.03208	5.33652	18.5979	11.8941	18.1985	17.4703
ENSG00000178741.11_2	COX5A	chr15:75212132-75230509	-	protein_coding	1.15352	2.22456	0.00462538	0.0306644	4.3681	3.21458	7.72945	9.33149	7.4402	8.75526	16.1137	31.4387	13.5125	21.572
ENSG00000108771.12_3	DHX58	chr17:40253422-40264751	-	protein_coding	1.15344	2.22444	0.00441841	0.0300584	2.60301	1.44957	2.7754	1.67656	1.00972	1.74019	4.6717	3.70567	4.93579	7.60048
ENSG00000163584.17_2	RPL22L1	chr3:170582664-170588272	-	protein_coding	1.15325	2.22415	0.000880222	0.0133616	2.90777	1.75452	3.41801	2.29906	2.09445	1.87375	4.82569	7.71589	6.43673	7.39967
ENSG00000164078.12_3	MST1R	chr3:49924435-49941306	-	protein_coding	1.15295	2.22368	0.0110436	0.0503055	1.35083	0.197877	0.169791	0.0622871	0.225085	0.136976	0.660787	2.91719	0.852236	2.51213
ENSG00000169855.19_2	ROBO1	chr3:78646390-79816965	-	protein_coding	1.15254	2.22305	0.0296802	0.0926489	3.39302	2.24048	4.76452	3.79364	3.32141	3.17587	9.90107	5.31306	7.00365	21.1107
ENSG00000128203.6_2	ASPHD2	chr22:26825239-26840981	+	protein_coding	1.15192	2.22209	0.0216966	0.0764144	1.45783	0.305911	0.49363	0.314438	0.147709	0.036426	0.482855	3.82741	2.19778	1.48735
ENSG00000101104.12_2	PABPC1L	chr20:43538703-43587676	+	protein_coding	1.15169	2.22173	0.00487678	0.0316651	2.1488	0.997115	2.08801	0.949417	0.776236	0.484439	2.67643	4.83055	3.2555	3.23963
ENSG00000139146.13_3	FAM60A	chr12:31433518-31479992	-	protein_coding	1.15149	2.22144	0.00338699	0.0262774	2.65187	1.50037	1.29529	1.96404	2.41896	1.75433	3.91627	6.95695	3.80164	7.30605
ENSG00000167695.14_2	FAM57A	chr17:635652-646212	+	protein_coding	1.15133	2.22119	0.00442563	0.03008	1.81067	0.659338	0.723763	0.768605	0.307599	0.560771	4.17963	1.78573	3.12029	1.54742
ENSG00000103855.17_2	CD276	chr15:73976307-74006859	+	protein_coding	1.15102	2.2207	0.000892901	0.0134718	3.04115	1.89014	3.17561	2.79992	2.84855	2.09142	6.44183	10.3971	5.73517	7.03693
ENSG00000029559.6_2	IBSP	chr4:88720733-88733587	+	protein_coding	1.15053	2.21995	0.00642618	0.0369345	1.19969	0.0491629	0	0.104007	0	0.038069	0.808731	2.69229	0.567834	1.65828
ENSG00000105887.10_3	MTPN	chr7:135611509-135662101	-	protein_coding	1.14967	2.21864	0.006329	0.036603	5.241	4.09133	23.8211	15.736	13.1739	13.338	40.4382	23.6947	42.7751	44.6625
ENSG00000244187.7_3	TMEM141	chr9:139685807-139687709	+	protein_coding	1.14812	2.21624	0.00425696	0.0294543	3.6505	2.50238	5.53918	4.8842	3.74871	4.64134	16.3954	14.8813	7.85919	9.16069
ENSG00000173950.15_3	XXYLT1	chr3:194789008-194991896	-	protein_coding	1.14792	2.21594	0.000227277	0.00780108	2.39362	1.2457	1.01628	1.54611	1.44362	1.52065	4.33137	3.70222	3.57184	5.65228
ENSG00000141458.12_2	NPC1	chr18:21086148-21166862	-	protein_coding	1.14744	2.21521	0.0276	0.0885563	3.47024	2.32279	3.97604	3.15626	4.70925	4.30584	6.14404	10.368	6.98059	22.2764
ENSG00000167524.14_3	SGK494	chr17:26934982-26941218	-	protein_coding	1.14672	2.2141	0.00145499	0.0173075	2.21178	1.06506	1.59792	1.37435	0.954935	0.589144	4.16899	3.24879	4.61972	2.73136
ENSG00000116455.13_3	WDR77	chr1:111982512-111991998	-	protein_coding	1.146	2.213	0.001264	0.0161796	2.79264	1.64664	2.63996	2.11509	1.73096	2.10363	6.76121	8.24494	4.19604	5.18259
ENSG00000049249.8_3	TNFRSF9	chr1:7975954-8003225	-	protein_coding	1.14559	2.21237	0.0316203	0.0960795	1.41072	0.265124	0.225359	0.166457	0.271729	0.147399	1.34175	0.829623	0.902021	5.13134
ENSG00000130816.14_3	DNMT1	chr19:10244021-10341962	-	protein_coding	1.14557	2.21234	0.00488103	0.0316743	3.96354	2.81797	5.65338	7.43863	6.30519	5.02872	10.0681	21.3228	11.4637	18.2359
ENSG00000139350.11_3	NEDD1	chr12:97301001-97347555	+	protein_coding	1.14363	2.20937	0.0238837	0.0807981	3.2131	2.06946	3.20082	2.8074	2.90615	3.96786	5.19373	11.5145	4.82513	15.3788
ENSG00000186416.13_3	NKRF	chrX:118722300-118739858	-	protein_coding	1.14335	2.20894	0.0316247	0.0960795	2.53743	1.39408	1.47701	1.02992	1.39727	2.95831	5.66085	7.01036	1.80621	6.58695
ENSG00000100207.18_4	TCF20	chr22:42556019-42739622	-	protein_coding	1.14321	2.20872	5.5454e-05	0.00503952	2.77346	1.63025	2.01232	2.299	1.87008	2.2199	5.93753	7.21195	4.79555	5.61964
ENSG00000102743.14_3	SLC25A15	chr13:41363548-41384247	+	protein_coding	1.14305	2.20847	0.0337246	0.100025	2.41274	1.26969	0.706604	2.3151	1.49519	1.39404	2.47474	10.1007	3.22628	3.93173
ENSG00000166797.10_2	FAM96A	chr15:64364758-64386217	-	protein_coding	1.14261	2.2078	0.00383756	0.0278874	4.36556	3.22295	10.7776	8.72274	6.79337	7.51622	17.3637	29.3372	14.0244	20.5738
ENSG00000118855.18_3	MFSD1	chr3:158449987-158547508	+	protein_coding	1.14228	2.20729	0.0174281	0.0663091	3.9815	2.83922	10.6838	5.8329	4.40565	5.07753	17.102	8.71297	15.1357	20.945
ENSG00000213906.9_3	LTB4R2	chr14:24774940-24781259	+	protein_coding	1.14226	2.20727	0.00206423	0.0205543	1.51722	0.374959	0.387521	0.2209	0.114491	0.497958	1.59307	1.10696	3.06006	2.02632
ENSG00000095066.11_4	HOOK2	chr19:12873817-12983554	-	protein_coding	1.14166	2.20635	0.002933	0.0245055	3.24676	2.10509	5.50104	2.81507	2.70357	2.72976	9.43334	6.7509	10.533	7.70497
ENSG00000185475.10_3	TMEM179B	chr11:62554887-62557877	+	protein_coding	1.14146	2.20604	0.00472634	0.0310761	2.03472	0.893258	2.08263	0.566041	0.590835	0.549673	3.05102	3.36399	2.43332	3.64389
ENSG00000095319.14_3	NUP188	chr9:131709978-131769375	+	protein_coding	1.14143	2.20599	6.33749e-05	0.00515164	3.45861	2.31718	3.8064	3.99739	4.84613	3.39275	9.61201	10.4289	11.4554	8.66989
ENSG00000196262.13_2	PPIA	chr7:44836279-44864163	+	protein_coding	1.14103	2.20539	0.000638992	0.0116051	5.80827	4.66724	25.7699	25.0329	23.2564	23.6559	47.9882	77.5411	44.8739	54.8603
ENSG00000214193.10_4	SH3D21	chr1:36771988-36790487	+	protein_coding	1.14082	2.20507	0.0146738	0.0595659	1.9847	0.843878	1.25978	0.786782	0.653603	0.554393	4.97362	1.31345	4.30896	2.34436
ENSG00000109084.13_2	TMEM97	chr17:26646121-26655711	+	protein_coding	1.14077	2.20499	0.00460014	0.0306031	1.6836	0.542828	0.522033	0.450582	0.292414	0.578563	1.28203	4.03083	1.63404	2.52106
ENSG00000101463.5_2	SYNDIG1	chr20:24449835-24647252	+	protein_coding	1.14029	2.20425	0.03362	0.0998339	1.28435	0.144063	0.265995	0.112087	0	0.059007	1.63778	2.6183	2.4557	0.0671754
ENSG00000134684.10_2	YARS	chr1:33240838-33283754	-	protein_coding	1.14016	2.20405	0.00203419	0.0203828	2.85961	1.71945	2.15754	2.38788	2.58954	2.06276	5.90899	10.005	4.46686	5.67685
ENSG00000120437.8_2	ACAT2	chr6:160181360-160200087	+	protein_coding	1.14009	2.20395	0.000608505	0.011299	3.30052	2.16043	3.19855	3.22871	3.98014	3.51713	6.6552	10.3327	7.68417	11.5084
ENSG00000108448.21_4	TRIM16L	chr17:18601311-18639431	+	protein_coding	1.13949	2.20303	0.036564	0.105523	2.18721	1.04772	0.866155	1.38386	1.04949	1.00311	1.91333	8.58935	4.43634	1.83255
ENSG00000236212.1_3	AC009262.1	chr7:34249138-34295955	+	lincRNA	1.13948	2.20302	0.0100121	0.047629	1.13948	0	0	0	0	0	0.514764	1.36766	0.682955	2.90243
ENSG00000100387.8_2	RBX1	chr22:41347351-41369313	+	protein_coding	1.13909	2.20242	0.00277759	0.0239424	3.10572	1.96663	4.01564	2.54536	2.39068	2.87067	5.98981	11.1802	5.86563	8.39424
ENSG00000173226.16_3	IQCB1	chr3:121488610-121553926	-	protein_coding	1.1387	2.20182	0.00110311	0.0151145	4.32458	3.18588	5.77042	9.33183	9.52178	8.31755	21.7491	17.5316	15.2172	22.5754
ENSG00000100216.5_2	TOMM22	chr22:39077953-39081426	+	protein_coding	1.13866	2.20177	0.00330605	0.0259048	4.19344	3.05477	8.95812	6.74614	6.48021	7.26299	16.8524	26.5213	11.9373	16.6277
ENSG00000256146.1_4	AC006206.1	chr12:5425127-5428513	+	lincRNA	1.13737	2.19979	0.000695976	0.0120414	1.18422	0.0468558	0	0.112728	0	0.023366	1.46762	1.80272	0.6038	1.40401
ENSG00000180992.6_2	MRPL14	chr6:44081191-44095194	-	protein_coding	1.13735	2.19976	0.000329854	0.00894146	3.59576	2.45842	3.87791	4.02208	4.35447	5.95656	10.8605	12.8528	8.99903	12.0055
ENSG00000186106.11_3	ANKRD46	chr8:101521980-101572012	-	protein_coding	1.13714	2.19945	0.00542353	0.0335887	2.54769	1.41055	1.06557	2.48306	0.952407	2.55552	5.98197	4.90866	3.55556	5.219
ENSG00000146263.11_3	MMS22L	chr6:97590037-97731093	-	protein_coding	1.1368	2.19893	0.000338733	0.00897264	1.72739	0.59059	0.505297	0.518616	0.413513	0.591368	2.39905	2.03485	1.66457	3.37387
ENSG00000123213.22_3	NLN	chr5:65018023-65167553	+	protein_coding	1.13654	2.19853	0.00323933	0.025693	2.16446	1.02792	1.18578	1.24231	0.898008	0.858412	4.34679	5.42735	2.34716	2.51131
ENSG00000104341.16_3	LAPTM4B	chr8:98787285-98865241	+	protein_coding	1.1347	2.19573	0.00689326	0.0383817	2.42725	1.29255	0.991342	1.44995	1.75191	1.68195	3.76203	6.89848	5.45063	2.44956
ENSG00000197905.8_4	TEAD4	chr12:3068496-3149839	+	protein_coding	1.13458	2.19555	0.0157015	0.062038	1.98968	0.855096	1.08807	0.83707	0.956483	0.426563	1.46004	4.75967	4.79567	2.02948
ENSG00000128294.15_2	TPST2	chr22:26917949-26992681	-	protein_coding	1.13455	2.19551	0.00278215	0.0239518	2.06921	0.934651	1.75981	0.843548	0.671979	0.569162	2.90358	3.36387	4.40601	2.36791
ENSG00000260377.1_3	AC083801.2	chr3:182457457-182458636	-	lincRNA	1.13442	2.19531	0.000924306	0.0137968	1.13442	0	0	0	0	0	1.32235	1.01189	2.03822	0.636173
ENSG00000167747.14_3	C19orf48	chr19:51300961-51308186	-	protein_coding	1.13428	2.19508	0.0200345	0.0724189	1.73018	0.595904	0.737253	0.350087	0.424151	0.56228	3.47926	4.63377	1.21547	1.16706
ENSG00000196510.12_3	ANAPC7	chr12:110810705-110841535	-	protein_coding	1.13421	2.19498	0.000125633	0.00622349	3.39391	2.25971	3.22916	4.4323	3.35798	4.25332	11.3901	8.08329	9.31875	9.51316
ENSG00000175792.11_3	RUVBL1	chr3:127783621-127872757	-	protein_coding	1.13396	2.1946	0.000177469	0.00711813	3.21782	2.08386	2.39146	3.99968	3.33721	3.39218	8.34441	7.03912	9.05142	8.92325
ENSG00000169567.11_2	HINT1	chr5:130494720-130507428	-	protein_coding	1.1335	2.1939	0.0155765	0.0617016	3.9916	2.85811	7.63116	6.00688	5.25011	6.31177	8.49139	27.1733	15.86	13.2018
ENSG00000108671.9_3	PSMD11	chr17:30771279-30810336	+	protein_coding	1.13325	2.19352	4.63863e-06	0.00244124	3.98097	2.84772	6.34454	6.21268	5.88119	6.36677	13.2581	15.2826	14.0457	16.798
ENSG00000241685.9_3	ARPC1A	chr7:98923533-98963885	+	protein_coding	1.133	2.19314	0.00302264	0.024786	5.32656	4.19356	26.0023	17.1589	13.0115	15.3145	36.2755	38.5028	50.0361	33.5056
ENSG00000165948.10_4	IFI27L1	chr14:94547628-94570192	+	protein_coding	1.13195	2.19155	0.000163866	0.00690192	1.82584	0.693892	0.760309	0.656607	0.611079	0.457483	2.01319	3.30363	2.13024	2.89127
ENSG00000160293.16_3	VAV2	chr9:136627016-136857726	-	protein_coding	1.13168	2.19114	0.0170681	0.0653712	3.30189	2.17021	2.77545	3.50695	3.87166	3.95069	6.74071	9.6454	17.2453	5.29191
ENSG00000163558.12_2	PRKCI	chr3:169940153-170023769	+	protein_coding	1.13167	2.19112	0.0153722	0.0612973	4.29829	3.16662	6.51596	9.29525	9.28898	7.16569	15.0683	35.5623	18.1794	12.2988
ENSG00000168255.19_1	POLR2J3	chr7:102178365-102213103	-	protein_coding	1.13079	2.18978	0.0203417	0.0730687	3.35136	2.22057	4.74313	3.08391	3.80784	3.18463	14.8382	4.34569	12.1826	8.7214
ENSG00000260064.1_4	AC092332.1	chr16:80661448-80662276	-	sense_intronic	1.13073	2.18969	0.00305404	0.0248849	1.19049	0.0597598	0.003741	0	0.118012	0.051695	1.19094	0.486317	1.62408	2.17521
ENSG00000021574.11_2	SPAST	chr2:32288680-32382706	+	protein_coding	1.13022	2.18892	0.000764532	0.0125322	3.03142	1.9012	3.08719	3.00664	2.19919	2.71558	7.27865	9.22044	5.00713	7.79214
ENSG00000075391.16_3	RASAL2	chr1:178063276-178453282	+	protein_coding	1.128	2.18556	0.00342314	0.0264184	2.63685	1.50885	2.75695	1.21528	1.7651	1.8501	7.87547	4.79831	5.00631	3.8415
ENSG00000089053.12_2	ANAPC5	chr12:121746048-121837699	-	protein_coding	1.12791	2.18543	0.000492556	0.0101947	3.45841	2.3305	5.6369	3.95325	3.34969	3.47595	11.0538	8.36502	9.59678	11.2049
ENSG00000136237.18_3	RAPGEF5	chr7:22157856-22396763	-	protein_coding	1.12749	2.18478	0.000337246	0.00897264	3.23276	2.10527	4.29785	3.15318	3.22913	2.68353	8.73224	6.58645	9.82645	8.76993
ENSG00000213699.8_3	SLC35F6	chr2:26987152-27004099	+	protein_coding	1.12737	2.18461	0.00622488	0.0362967	2.72274	1.59536	0.787664	2.97035	2.24472	2.62006	5.10764	4.88056	5.88147	6.68295
ENSG00000145014.17_4	TMEM44	chr3:194308402-194354418	-	protein_coding	1.12651	2.1833	0.0105989	0.0492523	2.14433	1.01782	1.55648	1.40009	0.709989	0.602181	6.29397	3.12287	2.14311	3.04117
ENSG00000214022.11_3	REPIN1	chr7:150065278-150071133	+	protein_coding	1.12572	2.18211	0.000988822	0.0142926	2.3874	1.26168	1.02657	2.29147	1.46702	1.00857	4.64912	4.44994	3.36843	4.57207
ENSG00000146950.12_2	SHROOM2	chrX:9754496-9917483	+	protein_coding	1.12446	2.1802	0.000111943	0.00595072	1.58352	0.459055	0.339228	0.421261	0.462137	0.283042	1.95191	1.41009	2.56858	2.17768
ENSG00000160124.9_2	CCDC58	chr3:122078438-122102078	-	protein_coding	1.12327	2.1784	0.00455811	0.0304532	3.69339	2.57012	3.23632	6.70075	5.14879	5.20045	11.8229	17.5252	10.0047	9.71402
ENSG00000278886.1_4	AC087821.1	chr8:18722191-18722757	-	TEC	1.12279	2.17767	0.000317461	0.00877005	1.32145	0.198665	0.194157	0.452629	0	0	1.53286	1.32091	1.27491	1.91711
ENSG00000197728.9_3	RPS26	chr12:56435637-56438459	+	protein_coding	1.12144	2.17564	0.00142349	0.017124	4.08558	2.96414	7.14193	6.24572	9.26421	5.12408	12.4279	19.0445	15.5022	17.706
ENSG00000167670.15_2	CHAF1A	chr19:4402659-4445015	+	protein_coding	1.12098	2.17494	0.0465839	0.122842	3.97394	2.85296	4.57822	6.89665	6.04672	7.77771	11.369	25.3427	6.62216	23.5484
ENSG00000140511.11_2	HAPLN3	chr15:89420519-89438857	-	protein_coding	1.12079	2.17467	0.0185795	0.0689592	1.81566	0.694868	1.12591	0.539586	0.424789	0.472329	3.02139	1.10043	2.00037	5.05922
ENSG00000153094.22_3	BCL2L11	chr2:111876955-111926024	+	protein_coding	1.12044	2.17414	0.00768375	0.0409148	2.28999	1.16954	2.00253	1.30131	0.337613	1.77	3.53404	3.8386	5.07935	3.28901
ENSG00000132517.14_2	SLC52A1	chr17:4935895-4955304	-	protein_coding	1.12043	2.17412	0.0269187	0.087278	1.12813	0.00769682	0	0	0	0.0215695	2.49524	2.08217	0.0745114	0.971782
ENSG00000239887.4_3	C1orf226	chr1:162336698-162356608	+	protein_coding	1.12038	2.17404	0.00119499	0.0156271	2.13769	1.01731	1.14995	0.926141	1.24841	0.802892	2.82689	4.33359	2.32228	4.53005
ENSG00000074695.5_2	LMAN1	chr18:56995055-57027194	-	protein_coding	1.1203	2.17393	0.00805579	0.041928	5.1604	4.0401	16.1968	15.9149	14.8201	14.916	25.0089	58.3338	25.1249	39.5753
ENSG00000159516.8_2	SPRR2G	chr1:153122058-153123345	-	protein_coding	1.11888	2.17178	0.0499124	0.128161	1.11888	0	0	0	0	0	1.18171	0	1.16021	3.72034
ENSG00000184076.13_3	UQCR10	chr22:30163358-30166402	+	protein_coding	1.11878	2.17163	0.0109598	0.050128	4.61848	3.49971	9.06219	11.0715	10.3343	10.891	22.0239	43.2775	15.4574	20.7012
ENSG00000184916.8_3	JAG2	chr14:105607318-105635161	-	protein_coding	1.11858	2.17133	0.0123364	0.0539769	2.12311	1.00453	1.3472	1.03407	0.899024	0.787009	7.1174	2.94605	2.22894	2.4821
ENSG00000261740.6_4	BOLA2-SMG1P6	chr16:29454551-29465972	-	protein_coding	1.11767	2.16997	0.00497634	0.0320853	1.73059	0.612917	0.949986	0.40054	0.440918	0.390142	3.04523	1.06587	2.99067	2.63703
ENSG00000172613.7_3	RAD9A	chr11:67085342-67165881	+	protein_coding	1.11753	2.16975	0.00571608	0.0346239	1.85961	0.742084	1.27922	0.434669	0.6622	0.439916	4.27738	1.60834	2.23662	2.8933
ENSG00000117266.15_4	CDK18	chr1:205473723-205501921	+	protein_coding	1.11736	2.1695	0.00121025	0.0157439	1.90469	0.787331	0.522517	0.919572	0.811361	0.675983	1.7639	2.39706	3.33379	3.83044
ENSG00000152056.16_3	AP1S3	chr2:224616403-224702744	-	protein_coding	1.11733	2.16945	0.0143209	0.0587622	1.56411	0.446784	0.557687	0.523969	0.300259	0.118139	1.88952	4.20258	0.844647	1.75692
ENSG00000236761.5_3	CTAGE9	chr6:132029824-132032157	-	protein_coding	1.11699	2.16894	0.000817685	0.0130014	1.4398	0.32281	0.250362	0.44284	0.047871	0.294614	2.5632	1.67886	1.1234	1.6722
ENSG00000175772.10_2	LINC01106	chr2:111132715-111142019	-	lincRNA	1.11684	2.16871	0.0479918	0.125402	2.58436	1.46752	1.70455	2.42973	1.69851	1.33662	7.29269	9.40343	4.72304	1.62046
ENSG00000176022.4_3	B3GALT6	chr1:1167645-1170421	+	protein_coding	1.11679	2.16864	0.0069289	0.0384796	2.82413	1.70734	2.6143	3.11457	1.6752	1.85846	5.22708	10.534	4.65974	5.18765
ENSG00000172586.7_2	CHCHD1	chr10:75541805-75543410	+	protein_coding	1.11675	2.16859	7.90279e-05	0.0055417	3.32357	2.20682	4.13925	3.86908	3.26484	3.25621	9.42666	8.61049	7.55283	10.7214
ENSG00000258593.2_3	AL583810.1	chr14:105324129-105325173	-	lincRNA	1.11639	2.16804	0.003975	0.0283431	1.30268	0.186291	0.110169	0.133958	0.185314	0.123303	2.37295	1.72588	1.65048	0.519649
ENSG00000137747.15_3	TMPRSS13	chr11:117771358-117800174	-	protein_coding	1.11597	2.1674	2.40223e-05	0.0037852	1.22469	0.108725	0.12308	0.132147	0.0631749	0	1.09179	1.12338	1.60726	1.57599
ENSG00000164163.10_3	ABCE1	chr4:146019084-146050331	+	protein_coding	1.1159	2.1673	0.0142101	0.0584899	4.11535	2.99945	6.64864	7.70837	6.52048	7.1646	15.6814	31.5017	10.4002	13.5991
ENSG00000162062.14_3	C16orf59	chr16:2510081-2514964	+	protein_coding	1.11556	2.1668	0.000368612	0.00917927	1.17098	0.0554136	0.0799979	0.048828	0	0.0294316	1.42594	1.0034	0.807683	1.92567
ENSG00000223477.3	LINC00842	chr10:47011753-47174018	-	lincRNA	1.11495	2.16587	0.0105164	0.0490727	1.13613	0.021182	0.00475332	0.0199752	0	0.0348004	2.69644	0.779875	1.52167	0.406618
ENSG00000138594.13_3	TMOD3	chr15:52121825-52239492	+	protein_coding	1.11473	2.16555	0.0143956	0.0589605	4.47943	3.3647	15.0621	11.0292	5.38049	8.13295	17.2906	25.3883	17.4466	26.8113
ENSG00000065518.7_2	NDUFB4	chr3:120315156-120321347	+	protein_coding	1.11414	2.16466	0.000486073	0.0101454	3.55005	2.43591	4.09561	4.5141	4.22788	4.83615	11.8276	13.0373	7.53964	11.241
ENSG00000143499.13_2	SMYD2	chr1:214454445-214510474	+	protein_coding	1.11322	2.16329	0.00517199	0.0326995	3.6696	2.55638	3.68424	5.87842	5.42604	4.78247	8.84749	19.0377	11.4993	9.63117
ENSG00000153975.9_2	ZUFSP	chr6:116956781-116989957	-	protein_coding	1.11223	2.16179	0.000140532	0.00656451	3.42021	2.30798	3.73704	4.58522	3.66873	3.86784	8.76767	11.9886	8.06954	10.4131
ENSG00000150756.13_4	FAM173B	chr5:10226442-10250009	-	protein_coding	1.11218	2.16171	0.0188422	0.0695814	2.1675	1.05532	1.48537	0.91094	0.879731	1.08931	5.11839	6.11074	1.61037	2.58654
ENSG00000102024.17_3	PLS3	chrX:114795501-114885181	+	protein_coding	1.11204	2.16151	0.000482441	0.0101168	5.956	4.84396	34.1157	28.3232	22.7127	26.8623	62.8089	49.7584	73.4167	60.6145
ENSG00000224885.1_4	EIPR1-IT1	chr2:3302112-3305236	-	sense_intronic	1.11152	2.16073	5.26332e-05	0.00503952	1.21068	0.0991598	0	0.06781	0.232839	0	1.44583	1.22209	1.01364	1.62201
ENSG00000178038.16_2	ALS2CL	chr3:46710487-46735194	-	protein_coding	1.11105	2.16003	0.00152781	0.0178232	2.09262	0.981571	0.705291	1.02724	1.03365	1.16247	3.9529	2.82724	2.12224	4.59188
ENSG00000229325.1_3	ACAP2-IT1	chr3:195001452-195003470	-	sense_intronic	1.11102	2.15998	0.0026624	0.0233831	1.9058	0.794781	1.29642	0.73627	0.606326	0.414197	3.55122	2.10319	2.00612	3.64372
ENSG00000257027.1_3	AC010186.3	chr12:9811163-9814681	+	sense_intronic	1.11096	2.15989	0.0142073	0.0584899	2.18853	1.07757	2.29904	0.741593	0.742761	0.981299	4.89205	1.80788	4.39533	3.83711
ENSG00000172354.9_3	GNB2	chr7:100271154-100276797	+	protein_coding	1.11085	2.15972	0.0309808	0.0948931	3.63629	2.52544	9.94521	3.75738	2.95566	4.3349	9.06301	9.50057	19.0106	10.3065
ENSG00000170035.15_3	UBE2E3	chr2:181831975-181941312	+	protein_coding	1.11083	2.1597	0.00453836	0.0303667	3.88716	2.77633	8.33381	5.75755	4.39302	5.47667	14.5627	19.7576	10.0965	12.3709
ENSG00000168672.3_2	FAM84B	chr8:127564687-127570638	-	protein_coding	1.11061	2.15937	0.0167715	0.0646782	3.01864	1.90803	3.01087	4.9212	1.92511	1.85562	12.1302	6.01573	5.86203	5.82349
ENSG00000155363.18_2	MOV10	chr1:113215763-113243368	+	protein_coding	1.11012	2.15863	0.000485219	0.010137	2.42131	1.31119	2.32189	1.20646	1.17689	1.37638	4.15957	4.4654	3.75541	5.13935
ENSG00000259865.1_3	AL390728.6	chr1:247350583-247351828	-	lincRNA	1.10966	2.15796	0.0283046	0.0898319	3.33519	2.22553	7.17022	4.06613	1.90833	2.9742	9.6805	13.5032	5.80979	8.83519
ENSG00000035687.9_3	ADSS	chr1:244571796-244615436	-	protein_coding	1.10944	2.15762	0.00143094	0.0171674	5.07307	3.96363	11.6018	14.4222	15.3417	17.6556	27.8466	41.5621	25.9113	37.8627
ENSG00000172345.13_3	STARD5	chr15:81601394-81616524	-	protein_coding	1.10866	2.15646	0.000962821	0.0140897	1.35322	0.24456	0.272186	0.172349	0.237155	0.0676986	1.08635	1.06677	1.96359	2.33385
ENSG00000171017.10_3	LRRC8E	chr19:7953390-7966906	+	protein_coding	1.10798	2.15544	0.00165052	0.0184876	1.17629	0.0683081	0.0796034	0.0531317	0.0228315	0.0392025	1.59455	2.11442	0.656299	0.949029
ENSG00000136908.17_2	DPM2	chr9:130697378-130700763	-	protein_coding	1.10777	2.15512	0.00214652	0.0210098	1.94923	0.841458	1.39603	0.842479	0.641737	0.422386	4.17642	2.68692	2.56375	2.26967
ENSG00000170540.14_3	ARL6IP1	chr16:18802989-18813000	-	protein_coding	1.1072	2.15427	0.00783743	0.0413396	4.49179	3.38459	17.1447	7.72621	6.87048	8.5472	19.9331	25.3403	19.9398	21.1938
ENSG00000083457.11_2	ITGAE	chr17:3617922-3704537	-	protein_coding	1.10692	2.15386	0.00684731	0.0382734	1.83944	0.732521	0.924926	0.612948	0.519087	0.615944	1.6372	3.12766	1.67743	4.6279
ENSG00000063601.16_3	MTMR1	chrX:149861444-149933576	+	protein_coding	1.10671	2.15354	0.0037104	0.0274811	2.86876	1.76205	2.0722	2.95027	2.2116	2.39566	7.54682	4.24036	5.07283	9.46592
ENSG00000115368.9_2	WDR75	chr2:190306159-190340291	+	protein_coding	1.10642	2.15311	0.00858166	0.0435112	3.74222	2.6358	5.42636	5.86781	4.58837	5.04991	10.4442	16.359	18.4028	7.31963
ENSG00000117407.16_3	ARTN	chr1:44398992-44402913	+	protein_coding	1.10612	2.15266	0.00542962	0.0336159	1.33548	0.229357	0.170855	0.0923323	0.171904	0.260152	1.80278	2.24783	1.99188	0.489185
ENSG00000260280.5_3	SLX1B-SULT1A4	chr16:29466426-29476284	+	processed_transcript	1.10579	2.15216	0.00724956	0.0394861	2.1907	1.08492	2.11735	1.39553	0.976092	0.37207	3.66806	2.78697	4.68256	3.32413
ENSG00000197757.7_3	HOXC6	chr12:54384408-54424607	+	protein_coding	1.10481	2.15071	0.036772	0.105891	1.39013	0.285315	0.337151	0.162062	0.136476	0.249062	0.548364	4.18362	0.749963	2.36006
ENSG00000146433.8_2	TMEM181	chr6:158957468-159056460	+	protein_coding	1.10459	2.15037	0.00205221	0.0204718	3.78785	2.68326	5.13743	5.81975	4.77627	6.03988	11.9209	19.8826	10.3223	10.9127
ENSG00000136295.14_2	TTYH3	chr7:2671585-2704436	+	protein_coding	1.1045	2.15025	0.00659138	0.037432	2.56348	1.45898	3.48163	1.38046	1.28746	1.34066	4.49939	3.96311	4.8118	6.69774
ENSG00000264772.6_4	AC016876.2	chr17:7476144-7485342	+	processed_transcript	1.10315	2.14823	0.00665083	0.037643	3.09156	1.98841	3.40469	3.96075	3.88648	1.32181	6.67341	7.51935	8.87316	7.18011
ENSG00000182446.13_3	NPLOC4	chr17:79523913-79615495	-	protein_coding	1.10313	2.1482	9.90894e-05	0.0057954	3.3892	2.28607	4.77848	3.54064	3.394	3.90814	11.3601	8.82681	9.38303	8.55536
ENSG00000117906.13_3	RCN2	chr15:77223960-77246733	+	protein_coding	1.10307	2.14812	0.0101899	0.0480766	3.3482	2.24512	3.68016	3.3306	3.72706	4.27226	8.21058	14.5433	5.068	11.381
ENSG00000158711.13_2	ELK4	chr1:205566684-205601090	-	protein_coding	1.10253	2.1473	0.00244711	0.0224678	3.83007	2.72755	7.92563	6.03102	4.22925	4.86406	14.8855	9.58117	14.6516	14.5516
ENSG00000189120.4_2	SP6	chr17:45922274-45933240	-	protein_coding	1.10247	2.14722	7.36057e-05	0.00540195	1.16522	0.0627493	0	0.106462	0.0238434	0.0504801	0.982058	1.59743	0.947626	1.5229
ENSG00000153485.5_3	TMEM251	chr14:93651296-93653434	+	protein_coding	1.10225	2.1469	0.0387243	0.109553	2.70817	1.60592	2.55211	3.6857	1.52179	1.04526	7.80883	9.37897	3.14112	3.81694
ENSG00000278900.1_4	AC139792.2	chr5:34105855-34106441	-	TEC	1.10095	2.14496	0.013935	0.0578686	1.54046	0.439509	0.685451	0	0.468314	0.366741	3.06163	1.24208	3.03487	0.948584
ENSG00000183527.11_2	PSMG1	chr21:40546695-40555777	-	protein_coding	1.10026	2.14394	0.000344686	0.00905206	3.46023	2.35997	3.68951	4.35951	3.64217	4.95265	8.17943	12.2193	8.86741	11.2548
ENSG00000239264.8_3	TXNDC5	chr6:7881750-7911047	-	protein_coding	1.09998	2.14352	0.0344188	0.101345	4.11564	3.01566	11.6831	7.12567	7.99943	3.61225	17.6634	10.7531	13.7407	26.9293
ENSG00000176170.13_2	SPHK1	chr17:74372665-74383941	+	protein_coding	1.09949	2.14279	0.032787	0.0981669	2.28698	1.18749	1.97253	1.11621	1.69722	0.585907	5.81445	3.18164	6.45349	1.67092
ENSG00000164032.11_2	H2AFZ	chr4:100869243-100871545	-	protein_coding	1.09872	2.14165	0.00562331	0.034313	4.35113	3.2524	7.38632	8.76805	9.28913	8.78424	20.5667	24.4151	11.2353	24.8696
ENSG00000272792.1	RP11-141C7.4	chr3:195366861-195367331	+	lincRNA	1.09861	2.14149	0.00958005	0.0463768	1.47411	0.375494	0.639466	0.124172	0.211267	0.268718	3.56646	0.894015	1.4014	1.86797
ENSG00000085719.12_3	CPNE3	chr8:87526656-87573726	+	protein_coding	1.09858	2.14143	0.00567267	0.0345182	4.54887	3.4503	14.1286	10.258	7.27316	9.13065	23.2358	31.6684	16.4486	20.7291
ENSG00000177380.13_3	PPFIA3	chr19:49622646-49654283	+	protein_coding	1.09857	2.14143	0.00375821	0.0275979	2.04192	0.943344	0.512231	1.29271	0.938916	1.03411	4.7332	3.46309	1.91669	2.85292
ENSG00000108039.17_2	XPNPEP1	chr10:111624524-111683311	-	protein_coding	1.09801	2.14059	6.38849e-05	0.00515164	2.49983	1.40182	2.1965	1.4684	1.53984	1.43254	4.75989	3.97909	4.93526	5.01296
ENSG00000134308.13_2	YWHAQ	chr2:9724101-9771143	-	protein_coding	1.09655	2.13842	0.000366973	0.00916407	5.86819	4.77164	26.4494	24.2238	24.8151	30.1465	47.7262	75.237	55.1329	54.8282
ENSG00000243725.6_3	TTC4	chr1:55181495-55208330	+	protein_coding	1.09654	2.13841	0.00206954	0.0205637	3.05571	1.95917	3.31526	2.84294	2.69786	2.72785	5.75833	11.5664	7.02763	6.01136
ENSG00000067064.10_3	IDI1	chr10:1085848-1095110	-	protein_coding	1.09641	2.13822	0.000443037	0.00994454	3.77385	2.67744	7.63441	5.1497	4.85151	4.39016	12.9143	13.0705	11.3394	13.4911
ENSG00000128944.13_3	KNSTRN	chr15:40674922-40686447	+	protein_coding	1.09615	2.13784	0.0015935	0.0181738	2.61326	1.51711	1.5759	2.06402	1.96264	1.87003	3.85427	7.3695	3.92855	6.0007
ENSG00000012211.12_3	PRICKLE3	chrX:49031613-49042981	-	protein_coding	1.09537	2.13668	6.30622e-05	0.00515164	2.21175	1.11638	0.991829	1.31578	1.12244	1.25671	4.44627	3.00507	3.27833	3.93435
ENSG00000125995.15_2	ROMO1	chr20:34287194-34288906	+	protein_coding	1.09501	2.13615	0.0142766	0.0586664	5.81542	4.7204	32.2701	26.5126	20.089	24.0202	47.4676	91.4643	34.7981	61.6867
ENSG00000136888.6_2	ATP6V1G1	chr9:117350026-117360653	+	protein_coding	1.09498	2.1361	0.000289089	0.00844433	6.44679	5.35181	42.1348	41.2048	38.4461	37.7288	105.904	76.4835	97.7755	69.7719
ENSG00000203668.2_4	CHML	chr1:241792155-241803556	-	protein_coding	1.09493	2.13602	0.00662606	0.0375432	3.65886	2.56394	4.54925	5.50243	4.43699	5.23187	7.36299	13.0509	10.0171	18.6596
ENSG00000183530.13_4	PRR14L	chr22:32072242-32146126	-	protein_coding	1.09483	2.13588	0.00172341	0.0188039	4.19906	3.10423	8.2855	7.92351	6.75222	7.51325	14.9054	26.6154	14.892	15.304
ENSG00000127586.16_2	CHTF18	chr16:838046-850737	+	protein_coding	1.09376	2.13429	7.60496e-05	0.00542124	1.88056	0.786801	0.579089	0.71128	0.732325	0.892543	3.34917	2.08276	2.68104	2.72479
ENSG00000214114.8_3	MYCBP	chr1:39328636-39339777	-	protein_coding	1.09309	2.1333	0.0050023	0.032161	3.05281	1.95972	1.69681	3.42297	2.8739	3.95477	7.34969	9.82786	5.15795	7.51725
ENSG00000166949.15_3	SMAD3	chr15:67356101-67487533	+	protein_coding	1.09145	2.13089	0.00358097	0.0270006	3.89959	2.80813	8.24828	5.46636	5.27701	5.40997	16.0988	12.6935	18.8085	9.69643
ENSG00000229833.9_3	PET100	chr19:7694623-7696842	+	protein_coding	1.09125	2.13059	0.00413623	0.0289937	3.62024	2.52899	6.18842	4.45247	4.02152	4.63827	11.3659	13.6396	7.05333	14.6847
ENSG00000030110.12_2	BAK1	chr6:33540324-33548070	-	protein_coding	1.09095	2.13014	0.00759205	0.0406296	2.01287	0.921923	1.0736	1.34217	0.570416	0.689459	2.63447	2.97063	1.87204	5.40103
ENSG00000224652.1_2	LINC00885	chr3:195869507-195887761	+	lincRNA	1.09087	2.13003	0.0109055	0.0500023	1.09087	0	0	0	0	0	2.93636	0.587023	0.731369	0.903148
ENSG00000075303.12_2	SLC25A40	chr7:87462883-87505672	-	protein_coding	1.09056	2.12957	0.000200836	0.0074399	2.55543	1.46487	2.05834	1.78468	1.25869	2.01833	5.88555	4.67269	4.08448	5.01277
ENSG00000119328.11_2	FAM206A	chr9:111696461-111713024	+	protein_coding	1.08985	2.12852	0.000903943	0.0135652	2.70691	1.61706	2.56711	1.9588	1.9576	1.83636	6.33501	5.70174	6.84353	3.71348
ENSG00000154473.17_2	BUB3	chr10:124913793-124929983	+	protein_coding	1.08969	2.12828	0.000174923	0.00709039	2.57309	1.4834	2.48333	1.76686	1.32011	1.73338	4.53092	4.83478	4.86314	5.62756
ENSG00000165609.12_3	NUDT5	chr10:12207324-12238143	-	protein_coding	1.08872	2.12685	0.000917272	0.0137009	2.57764	1.48892	2.54777	1.49527	1.37516	1.95169	4.79018	6.56927	4.0453	4.74322
ENSG00000197147.13_3	LRRC8B	chr1:89990395-90063423	+	protein_coding	1.08826	2.12617	0.0091339	0.0451063	2.1251	1.03685	2.42062	0.738695	0.749038	0.703568	4.17223	3.23787	2.29467	4.01465
ENSG00000101361.16_3	NOP56	chr20:2632791-2639039	+	protein_coding	1.08819	2.12607	0.0116711	0.0521135	3.9946	2.90641	5.77799	7.65523	6.60055	6.08672	12.5453	28.3126	11.3644	12.1511
ENSG00000102144.13_2	PGK1	chrX:77320685-77384793	+	protein_coding	1.08776	2.12544	0.00240623	0.0221947	5.5414	4.45364	23.0064	22.1418	18.6728	20.0921	34.5296	57.2285	60.0549	36.2443
ENSG00000082701.14_4	GSK3B	chr3:119540170-119813264	-	protein_coding	1.08767	2.1253	1.90743e-05	0.00344183	3.75663	2.66896	5.95945	5.66942	4.88616	4.9876	14.4571	11.4351	12.2718	12.0834
ENSG00000163393.12_2	SLC22A15	chr1:116519119-116612675	+	protein_coding	1.08721	2.12462	0.0124697	0.0542234	1.98029	0.893082	1.96123	0.824362	0.605788	0.371219	3.11883	2.77639	4.47537	1.84605
ENSG00000131979.18_3	GCH1	chr14:55308726-55369570	-	protein_coding	1.08719	2.1246	0.0046516	0.0307473	1.94971	0.862514	1.7849	0.529434	0.509706	0.699563	2.26703	3.98522	2.48644	2.92157
ENSG00000270066.3_3	AL356488.2	chr1:109642815-109643241	+	lincRNA	1.08704	2.12437	0.00750844	0.04035	7.82892	6.74188	180.333	97.8353	80.4794	88.8663	252.022	194.557	214.423	249.744
ENSG00000257093.6_3	KIAA1147	chr7:141356528-141401953	-	protein_coding	1.08668	2.12384	0.0211779	0.0750601	3.63683	2.55016	5.00929	5.31694	3.99304	5.2087	13.6901	5.5808	19.319	11.1893
ENSG00000160072.19_2	ATAD3B	chr1:1407149-1433228	+	protein_coding	1.08638	2.1234	0.000674881	0.0118342	2.60196	1.51558	1.82545	1.8569	2.08302	1.68522	5.21443	6.9395	5.04776	3.55281
ENSG00000101193.7_2	GID8	chr20:61569471-61579827	+	protein_coding	1.08524	2.12173	0.00446103	0.0301626	3.83332	2.74808	8.84723	5.95469	4.39651	4.51206	16.6471	11.8529	10.512	14.8107
ENSG00000108219.14_2	TSPAN14	chr10:82213922-82292879	+	protein_coding	1.08466	2.12087	0.000731198	0.0122802	1.78369	0.699036	1.22575	0.406331	0.430013	0.55174	2.76361	2.56096	2.5286	1.9717
ENSG00000151665.12_3	PIGF	chr2:46808076-46844258	-	protein_coding	1.08396	2.11984	0.00289786	0.0244018	1.86576	0.781804	1.25189	0.625371	0.474224	0.619285	2.39566	4.10155	1.80513	2.63094
ENSG00000174938.14_3	SEZ6L2	chr16:29882480-29910868	-	protein_coding	1.08364	2.11937	0.015481	0.0615041	1.30553	0.221889	0.0637227	0.303077	0.160102	0.150498	0.809361	2.90304	0.595433	2.31287
ENSG00000073969.18_3	NSF	chr17:44668035-44834830	+	protein_coding	1.08346	2.11912	0.00191945	0.0197848	3.52163	2.43817	5.03342	4.56746	4.00678	4.12938	9.39503	15.9206	7.9453	10.0567
ENSG00000108578.14_2	BLMH	chr17:28575213-28619074	-	protein_coding	1.08274	2.11805	0.00252442	0.0228176	2.78229	1.69955	2.53528	2.2749	1.91393	2.29888	5.78091	6.62483	3.65634	8.30358
ENSG00000154845.15_2	PPP4R1	chr18:9546789-9615238	-	protein_coding	1.08246	2.11764	0.00244013	0.0224225	4.39462	3.31217	12.1491	8.12607	7.78079	8.23696	16.822	16.4743	20.7678	27.8725
ENSG00000000460.16_4	C1orf112	chr1:169631245-169823221	+	protein_coding	1.08088	2.11532	0.00869641	0.0438643	1.89853	0.817656	1.01723	0.910917	0.474049	0.698431	1.85562	4.03351	1.59256	4.18516
ENSG00000107362.13_2	ABHD17B	chr9:74477368-74525847	-	protein_coding	1.0803	2.11448	0.00103886	0.0146653	2.79735	1.71704	2.75677	1.95595	2.04489	2.45498	5.07572	8.25128	6.47124	4.56097
ENSG00000078124.11_3	ACER3	chr11:76571911-76737841	+	protein_coding	1.08027	2.11444	0.0432469	0.117258	2.13454	1.05427	2.40228	1.0273	1.14469	0.257233	2.13184	5.92303	2.00453	4.70658
ENSG00000273035.1_4	AC007684.1	chr2:39550469-39550945	-	sense_intronic	1.07957	2.11341	0.00529254	0.0331181	1.51624	0.43667	0.986546	0.196309	0.276039	0.106615	1.79409	1.17818	1.85793	2.84901
ENSG00000163755.8_2	HPS3	chr3:148847371-148891519	+	protein_coding	1.07932	2.11303	0.00162849	0.0183564	3.23635	2.15703	5.33557	3.35882	2.56535	3.01853	6.94486	9.39844	8.45221	9.10092
ENSG00000143742.12_2	SRP9	chr1:225965515-225978168	+	protein_coding	1.07897	2.11253	0.0343146	0.101171	5.84988	4.77091	24.6932	21.7435	31.8232	27.9662	41.6985	92.0172	31.1202	85.7371
ENSG00000248773.1_4	AC108727.1	chr3:140691586-140692097	+	sense_intronic	1.07887	2.11238	0.00155212	0.0179383	2.15223	1.07336	0.759478	1.63595	0.633421	1.58845	3.9755	2.87335	3.35539	3.65155
ENSG00000279281.1_4	AC015883.1	chr17:55525579-55527652	+	TEC	1.07885	2.11235	0.0110837	0.0504266	2.03335	0.954503	1.03954	0.684989	1.18734	0.876256	3.85813	2.10368	1.81943	5.60526
ENSG00000008513.14_3	ST3GAL1	chr8:134467091-134584183	-	protein_coding	1.07882	2.11231	0.0490248	0.126939	2.89849	1.81967	6.68957	2.78303	1.08026	1.56592	6.35007	8.42933	6.63176	4.84433
ENSG00000271590.1_4	AC108463.3	chr2:111968572-111970053	-	lincRNA	1.0782	2.11141	0.0173786	0.0661751	1.98087	0.902665	1.43543	1.02839	0.44672	0.709245	3.88383	2.0479	5.2068	1.62769
ENSG00000066248.14_2	NGEF	chr2:233743396-233877982	-	protein_coding	1.07762	2.11056	0.0250681	0.0834424	1.28331	0.205683	0.280656	0.352365	0.0212714	0	0.325697	2.47333	2.66964	1.07703
ENSG00000230732.4_4	AC016949.1	chr3:196639517-196641450	+	sense_intronic	1.07756	2.11047	0.00449607	0.0302659	3.03759	1.96002	4.33462	2.3012	2.98092	2.26847	7.40386	4.7339	8.65982	8.76609
ENSG00000233822.4_3	HIST1H2BN	chr6:27805538-27833576	+	protein_coding	1.07679	2.10934	0.00587422	0.0351808	1.55067	0.473884	0.55585	0.262692	0.427329	0.326858	1.79236	2.37997	0.858431	3.19921
ENSG00000103653.16_3	CSK	chr15:75074398-75095539	+	protein_coding	1.07651	2.10893	0.0256474	0.0847151	3.49542	2.4189	7.92931	5.28467	2.91859	2.71896	8.60655	13.1525	7.14054	13.6166
ENSG00000189007.15_3	ADAT2	chr6:143743969-143771810	-	protein_coding	1.07589	2.10802	1.27793e-05	0.00290793	1.76705	0.691161	0.51349	0.817193	0.524157	0.62118	2.40081	2.76495	2.11806	2.36136
ENSG00000128394.16_2	APOBEC3F	chr22:39436609-39449915	+	protein_coding	1.07555	2.10752	0.0170579	0.0653432	2.10046	1.02492	1.5185	1.11819	0.496842	1.14703	1.76892	5.59476	2.42887	4.4019
ENSG00000002549.12_2	LAP3	chr4:17578815-17609595	+	protein_coding	1.07539	2.1073	0.0237937	0.0805787	4.52378	3.44839	14.0712	9.02735	6.88373	10.918	16.052	14.271	30.4142	33.2299
ENSG00000161647.18_3	MPP3	chr17:41878167-41910538	-	protein_coding	1.0749	2.10658	0.00475863	0.0311967	2.18464	1.10974	0.948686	1.22835	1.50419	0.994628	4.52194	3.9505	4.53266	1.82415
ENSG00000175455.14_4	CCDC14	chr3:123616152-123680255	-	protein_coding	1.07482	2.10646	0.00176751	0.018979	3.62726	2.55244	3.97057	6.19978	5.2037	4.33426	12.3731	12.8382	7.83344	13.2633
ENSG00000134444.13_3	KIAA1468	chr18:59854491-59975062	+	protein_coding	1.07392	2.10515	0.00266154	0.0233831	3.26611	2.19219	4.60489	4.14188	2.51954	3.30017	7.76239	6.84188	8.49489	12.1298
ENSG00000185883.11_3	ATP6V0C	chr16:2563871-2570219	+	protein_coding	1.0731	2.10394	0.0464922	0.122687	4.68919	3.6161	23.0267	9.38315	8.59473	8.44406	35.0211	13.9033	25.1479	30.5556
ENSG00000274627.1_4	AC092123.2	chr16:89583205-89588625	+	sense_intronic	1.07264	2.10328	0.020801	0.0742184	3.12722	2.05458	4.23068	3.14911	3.11832	2.33221	10.4548	3.5295	10.063	9.15404
ENSG00000198060.9_2	MARCH5	chr10:94050920-94113721	+	protein_coding	1.07254	2.10313	0.0124741	0.0542234	3.28583	2.21329	4.67395	3.53006	3.22314	3.26036	11.6243	5.09115	7.12918	13.4738
ENSG00000138316.10_2	ADAMTS14	chr10:72432559-72522197	+	protein_coding	1.0723	2.10278	0.00424197	0.0293984	1.25818	0.185879	0.125139	0.344245	0.080948	0.024075	2.2447	1.78734	1.29096	0.579839
ENSG00000149658.17_2	YTHDF1	chr20:61826781-61847586	-	protein_coding	1.07212	2.10252	0.000457604	0.00999892	3.5192	2.44709	5.39981	4.48309	3.80876	4.24036	10.289	12.7214	11.3739	8.01532
ENSG00000281162.2_3	AC005035.1	chr2:102578518-102603629	+	lincRNA	1.07186	2.10213	0.04141	0.114065	1.24385	0.171993	0.411911	0.14102	0	0	0.193937	1.80839	3.45332	1.10679
ENSG00000175106.16_3	TVP23C	chr17:15405578-15466909	-	protein_coding	1.07112	2.10106	0.024421	0.0819836	3.18091	2.10979	3.46522	3.04305	3.11798	3.66881	8.62797	5.2872	5.27806	16.7984
ENSG00000280207.1_4	AC106795.5	chr5:177394005-177394458	+	lincRNA	1.07102	2.10091	0.0327802	0.0981608	1.21739	0.146376	0	0.203476	0.21475	0.026431	2.72749	0.383873	0.574003	2.60054
ENSG00000075702.16_3	WDR62	chr19:36545783-36596008	+	protein_coding	1.07061	2.10032	0.00199651	0.0202135	1.19898	0.12837	0.0699911	0.141826	0.0534351	0.109136	1.21941	1.51417	0.591224	2.12858
ENSG00000182272.11_3	B4GALNT4	chr11:369796-382116	+	protein_coding	1.07046	2.1001	0.0147512	0.0597822	1.89999	0.829532	0.922311	1.1331	0.544076	0.575261	1.33073	4.88129	3.55922	2.10428
ENSG00000177565.16_3	TBL1XR1	chr3:176737128-176945788	-	protein_coding	1.07007	2.09953	0.00104259	0.0146902	5.03605	3.96598	19.1266	14.3297	10.597	15.6675	33.8978	33.4585	33.2261	27.1553
ENSG00000128626.11_2	MRPS12	chr19:39421188-39423802	+	protein_coding	1.07006	2.09952	0.000325457	0.00890232	2.24558	1.17552	1.63582	1.16714	1.11541	1.15414	4.15732	4.74387	2.87101	3.41061
ENSG00000198258.10_2	UBL5	chr19:9938568-9940791	+	protein_coding	1.07	2.09943	0.000873855	0.0133191	4.01412	2.94412	7.1119	7.55101	5.59292	6.67107	12.4634	19.141	12.4061	17.7474
ENSG00000171603.16_2	CLSTN1	chr1:9789084-9884584	-	protein_coding	1.06986	2.09923	0.00038113	0.00932254	5.95688	4.88703	28.77	30.7894	26.8656	28.0694	67.0328	54.9123	77.3225	48.9678
ENSG00000111711.9_3	GOLT1B	chr12:21654715-21671342	+	protein_coding	1.06956	2.09879	0.00609661	0.0359167	2.72631	1.65675	2.18114	2.47781	1.33325	2.82891	3.89658	4.89378	5.89445	8.63857
ENSG00000275632.1_3	AL035461.2	chr20:5981064-5981587	+	lincRNA	1.0694	2.09856	0.00870348	0.0438802	1.69683	0.627434	0.925429	1.21601	0	0.334774	2.81665	2.0245	1.76324	2.46286
ENSG00000158092.6_3	NCK1	chr3:136581050-136668665	+	protein_coding	1.06864	2.09745	0.0101133	0.0478707	3.16402	2.09539	4.23735	2.60959	3.46711	2.94915	12.7503	5.75265	5.46367	9.75471
ENSG00000159363.17_3	ATP13A2	chr1:17312453-17338423	-	protein_coding	1.06859	2.09738	0.000948401	0.0139884	1.89405	0.825463	1.44454	0.75784	0.542891	0.487455	3.19076	2.60196	2.80212	2.3251
ENSG00000141543.9_3	EIF4A3	chr17:78109013-78120982	-	protein_coding	1.06827	2.09692	0.00594663	0.0353872	4.26245	3.19418	8.04586	6.02506	9.71987	9.30118	16.6947	24.7585	21.7974	12.0572
ENSG00000198538.10_3	ZNF28	chr19:53300662-53360853	-	protein_coding	1.06703	2.09512	0.0154585	0.0614469	2.37905	1.31202	2.392	1.10267	1.67691	0.990513	4.6985	6.42267	2.10402	4.57719
ENSG00000158402.18_3	CDC25C	chr5:137620954-137674044	-	protein_coding	1.06698	2.09504	0.000833354	0.0130826	1.12376	0.0567776	0.072367	0	0.0647647	0.0251088	0.671754	1.97794	1.10102	1.15586
ENSG00000088826.17_2	SMOX	chr20:4101627-4168394	+	protein_coding	1.0669	2.09493	0.0476333	0.124684	1.86442	0.797512	2.18568	0.447072	0.467873	0.348712	0.969852	4.49658	3.20547	2.86046
ENSG00000279089.1_4	AC005839.1	chr17:49260552-49263764	-	TEC	1.06685	2.09485	0.00099077	0.0143022	1.7723	0.705451	1.27183	0.341974	0.394894	0.662594	2.56419	2.33591	2.61786	2.16543
ENSG00000203817.5	FAM72C	chr1:149438750-149459549	-	protein_coding	1.06678	2.09475	0.00576214	0.0348078	1.09767	0.0308913	0	0	0	0.0894237	1.29155	2.35087	0.464226	0.865655
ENSG00000224034.1_3	LINC02561	chr10:5307996-5313199	-	lincRNA	1.06566	2.09313	0.0259894	0.0853866	1.06566	0	0	0	0	0	0.705641	2.65795	1.65244	0.159885
ENSG00000151881.14_3	TMEM267	chr5:43444354-43483995	-	protein_coding	1.06563	2.09308	0.00486667	0.0316362	2.2759	1.21027	1.22425	1.87999	1.0172	1.21811	6.08185	4.38543	2.95768	2.64456
ENSG00000077713.18_3	SLC25A43	chrX:118533023-118588441	+	protein_coding	1.06535	2.09267	0.0136115	0.0570544	2.3399	1.27456	2.75264	1.7969	0.628268	1.00438	5.95714	3.5954	3.83989	3.24557
ENSG00000164815.10_2	ORC5	chr7:103766788-103848495	-	protein_coding	1.06456	2.09153	0.000885228	0.0134012	2.875	1.81045	2.63787	2.32712	2.37716	2.70279	7.59175	8.34823	4.76576	5.25435
ENSG00000180044.5_2	C3orf80	chr3:159943283-159946000	+	protein_coding	1.06364	2.0902	0.007873	0.0414235	1.35928	0.295635	0.67058	0.187917	0.109338	0.031009	2.87152	1.66519	1.25084	0.865421
ENSG00000114978.17_2	MOB1A	chr2:74379655-74406025	-	protein_coding	1.06361	2.09015	0.00234425	0.0219309	4.91289	3.84929	19.5293	12.4966	9.80109	13.419	26.2903	30.9484	26.2177	33.7059
ENSG00000184828.9_3	ZBTB7C	chr18:45553044-45937123	-	protein_coding	1.06323	2.08961	0.0351471	0.102813	2.0334	0.97017	2.00096	1.18847	0.458511	0.53777	6.13816	2.12747	3.55637	1.76098
ENSG00000130193.7_2	THEM6	chr8:143808621-143818345	+	protein_coding	1.06226	2.0882	0.0305233	0.0942143	1.98194	0.919685	0.952135	0.856902	0.581357	1.23399	5.71897	1.9133	4.38737	1.30904
ENSG00000130164.13_3	LDLR	chr19:11200038-11244492	+	protein_coding	1.06217	2.08806	0.023217	0.0792361	3.18386	2.12169	4.88649	3.21193	3.77436	2.03051	4.846	12.0507	6.1908	11.4301
ENSG00000173621.8_3	LRFN4	chr11:66624118-66627946	+	protein_coding	1.06213	2.08801	0.00263992	0.0233379	1.82619	0.764063	1.09424	0.787231	0.382785	0.607169	2.74518	3.51469	2.69207	1.53271
ENSG00000276564.1_4	AC130650.2	chr16:14244690-14247092	+	lincRNA	1.06208	2.08794	0.00677882	0.0380725	1.82109	0.759009	0.997062	0.331815	0.644286	0.875537	3.03503	1.2117	2.92112	3.45479
ENSG00000103591.12_2	AAGAB	chr15:67493371-67547533	-	protein_coding	1.06103	2.08641	0.0130717	0.0556561	3.60957	2.54855	4.48753	5.04389	5.26598	4.63737	11.6427	19.0192	6.209	11.1674
ENSG00000121716.20_4	PILRB	chr7:99949799-99965356	+	protein_coding	1.06095	2.08631	0.00277483	0.0239353	2.3107	1.24975	1.54955	1.46536	1.67013	0.905319	6.12274	2.82369	3.78632	3.64759
ENSG00000279948.1_4	AC008895.1	chr19:47449792-47452413	+	TEC	1.0606	2.0858	0.00213594	0.0209521	2.23755	1.17695	1.64144	1.14271	1.22443	1.07573	5.82034	2.704	3.14985	3.71819
ENSG00000134716.9_2	CYP2J2	chr1:60358980-60392462	-	protein_coding	1.06006	2.08501	0.00733783	0.0397962	1.37371	0.313656	0.491976	0.477565	0.0823595	0	1.90376	2.12334	0.641452	2.02906
ENSG00000224260.6_3	AL023754.1	chr1:209701800-209741018	-	lincRNA	1.05949	2.0842	0.0418932	0.114971	1.06772	0.00823129	0	0.0230844	0	0	3.17621	1.26185	0.0422886	0.960787
ENSG00000280018.3_4	CU634019.6	GL000195.1:137967-149287	+	lincRNA	1.0592	2.08377	0.00222038	0.021395	1.32615	0.266953	0.26762	0.228659	0.209382	0.112908	0.996951	2.76415	1.42765	1.16582
ENSG00000133119.12_3	RFC3	chr13:34392186-34540695	+	protein_coding	1.05913	2.08367	0.047511	0.12448	2.71426	1.65513	2.91322	2.19141	1.5711	2.06439	3.8197	13.3172	2.96612	5.77721
ENSG00000068878.14_2	PSME4	chr2:54091204-54197977	-	protein_coding	1.05798	2.08201	0.000516705	0.0104172	4.10506	3.04708	6.91599	6.63865	8.26462	7.33115	16.3603	20.2734	12.132	17.0826
ENSG00000100147.13_2	CCDC134	chr22:42196683-42222303	+	protein_coding	1.05758	2.08144	0.0154558	0.0614469	2.73345	1.67586	2.28442	2.09241	1.83268	2.62232	6.52794	9.24709	2.71141	5.83252
ENSG00000164713.9_2	BRI3	chr7:97881691-97939753	+	protein_coding	1.05749	2.08131	0.0357432	0.103984	2.85276	1.79527	6.25311	1.97121	1.14017	2.14638	7.20529	6.17185	6.99814	4.78561
ENSG00000196236.12_2	XPNPEP3	chr22:41253081-41328819	+	protein_coding	1.05673	2.08021	0.00665337	0.037643	2.31046	1.25373	1.91876	1.97196	0.645933	1.26459	3.82697	5.9264	3.39283	3.12239
ENSG00000161642.17_2	ZNF385A	chr12:54762917-54785082	-	protein_coding	1.05595	2.07908	0.0146295	0.0594508	2.54387	1.48792	4.19315	1.46775	1.15139	1.24483	4.55229	5.86599	4.84721	4.18795
ENSG00000075131.9_4	TIPIN	chr15:66628544-66679084	-	protein_coding	1.05522	2.07803	0.00386985	0.0280341	2.66079	1.60557	1.99563	2.02694	2.02129	2.1305	5.11965	7.76295	3.12395	6.23126
ENSG00000197622.12_2	CDC42SE1	chr1:151023447-151042801	-	protein_coding	1.0552	2.078	0.0251658	0.0836678	4.58296	3.52776	20.2973	9.56811	8.80078	7.02169	21.3208	33.548	18.5305	20.9073
ENSG00000130332.14_3	LSM7	chr19:2321516-2328619	-	protein_coding	1.055	2.07771	0.00570187	0.0346068	2.74588	1.69088	2.09635	2.35469	2.24023	2.22807	5.61615	7.27563	3.13521	7.94252
ENSG00000071553.16_3	ATP6AP1	chrX:153656978-153664862	+	protein_coding	1.05495	2.07764	0.00422555	0.029364	2.28852	1.23357	2.73177	0.965083	0.799724	1.31669	4.09968	3.74337	3.94457	3.76315
ENSG00000161618.9_3	ALDH16A1	chr19:49956426-49974305	+	protein_coding	1.05489	2.07756	0.00669942	0.0378343	1.89055	0.835661	1.70988	0.543299	0.630825	0.487402	3.22361	2.09756	2.02897	3.76931
ENSG00000077585.13_3	GPR137B	chr1:236305805-236385165	+	protein_coding	1.05455	2.07707	0.0308781	0.0947212	2.13694	1.0824	2.88394	0.926994	0.414845	0.898773	4.15109	2.37734	2.48912	5.1652
ENSG00000164758.7_2	MED30	chr8:118532952-118552501	+	protein_coding	1.05446	2.07694	0.00381746	0.0278137	3.59258	2.53812	6.87085	4.37631	3.54607	4.91647	10.1976	15.8044	9.66789	9.55055
ENSG00000126215.13_2	XRCC3	chr14:104163946-104181841	-	protein_coding	1.05421	2.07658	0.0103432	0.0486195	1.34411	0.289896	0.261092	0.339788	0.181092	0.119446	1.32788	3.45477	0.818889	1.20229
ENSG00000115806.12_2	GORASP2	chr2:171784974-171823639	+	protein_coding	1.05307	2.07495	0.00363794	0.0272496	3.23488	2.18181	3.4689	3.89597	2.69751	4.2385	10.5081	11.2509	5.8581	7.1247
ENSG00000169359.13_2	SLC33A1	chr3:155538813-155572218	-	protein_coding	1.05264	2.07432	0.000316324	0.00875959	2.82626	1.77362	2.93937	2.41118	2.35755	2.02901	5.86587	7.0884	4.68595	7.01309
ENSG00000159958.6_3	TNFRSF13C	chr22:42318027-42322822	-	protein_coding	1.05263	2.07431	0.00465064	0.0307473	1.1821	0.129473	0.1994	0.094041	0.009514	0.080915	1.40965	0.717919	0.826564	2.50593
ENSG00000237594.2_3	AP000251.1	chr21:32931558-32932800	+	lincRNA	1.05246	2.07406	0.0162249	0.0633793	1.05246	0	0	0	0	0	0.789757	2.87532	0.380406	0.932772
ENSG00000163608.14_3	NEPRO	chr3:112721287-112738708	-	protein_coding	1.0524	2.07397	0.000556712	0.0107941	2.90703	1.85463	2.56418	3.06507	2.05113	2.86997	6.95517	5.08853	6.03471	8.28972
ENSG00000106638.15_2	TBL2	chr7:72983262-72993121	-	protein_coding	1.05213	2.0736	0.00287153	0.0242836	2.4789	1.42677	2.40944	1.39152	1.42549	1.64146	4.96052	6.74582	3.59648	3.55115
ENSG00000112039.3_2	FANCE	chr6:35420138-35434880	+	protein_coding	1.0517	2.07297	0.017227	0.0657324	2.69914	1.64745	1.70883	2.67584	1.61859	2.69417	8.24464	2.65696	5.65725	6.90296
ENSG00000225506.2_3	CYP4A22-AS1	chr1:47562325-47644943	-	lincRNA	1.05165	2.0729	0.0365899	0.105557	1.15615	0.104494	0.061028	0.204876	0.045091	0	1.70923	3.2771	0.250976	0.701748
ENSG00000170899.10_2	GSTA4	chr6:52842746-52860176	-	protein_coding	1.05087	2.07178	0.0333539	0.0992739	3.57363	2.52276	5.89792	3.84565	3.91396	5.64047	18.7389	12.5048	5.03703	11.4865
ENSG00000130702.15_3	LAMA5	chr20:60883011-60942368	-	protein_coding	1.05059	2.07138	0.0050173	0.0321952	3.80359	2.753	3.68631	7.68835	5.57378	6.71535	17.1836	13.1178	12.4102	10.0431
ENSG00000125484.11_2	GTF3C4	chr9:135545422-135570342	+	protein_coding	1.0502	2.07082	0.00241145	0.0222133	2.97101	1.92081	3.42178	3.165	1.66658	3.18519	7.89502	7.37382	7.31542	5.10229
ENSG00000129911.8_2	KLF16	chr19:1852398-1863567	-	protein_coding	1.04928	2.06949	0.00186678	0.019491	1.73898	0.6897	1.20014	0.468199	0.266898	0.653881	2.01138	3.08333	1.98859	2.37823
ENSG00000274421.1_4	AL162390.1	chr9:72925791-72927036	+	sense_intronic	1.04894	2.06902	0.00859728	0.0435607	3.12168	2.07273	2.27382	3.56275	4.5061	2.80796	7.24407	5.2115	12.0226	7.60671
ENSG00000125304.8_2	TM9SF2	chr13:100153671-100216260	+	protein_coding	1.04868	2.06864	0.00247687	0.0226211	5.05702	4.00834	18.6907	17.0848	11.3747	14.2199	27.0739	42.7104	27.6421	33.9432
ENSG00000062822.12_3	POLD1	chr19:50887461-50921275	+	protein_coding	1.04845	2.06831	0.00391081	0.0281617	2.45083	1.40238	1.82576	1.57284	1.44761	1.74371	4.09491	3.25085	3.78219	7.62683
ENSG00000164543.5_2	STK17A	chr7:43622357-43666385	+	protein_coding	1.0479	2.06752	0.00187374	0.0195454	4.02365	2.97575	9.58307	6.51328	7.60963	4.59413	14.4509	16.5039	15.8903	14.3191
ENSG00000185621.11_3	LMLN	chr3:197687071-197770591	+	protein_coding	1.04783	2.06741	6.19576e-05	0.00515164	1.78959	0.741768	0.738691	0.633864	0.717176	0.602966	2.38099	2.57982	3.07614	1.89555
ENSG00000167112.9_3	TRUB2	chr9:131067440-131085021	-	protein_coding	1.04693	2.06613	0.00177518	0.0190228	2.51757	1.47064	1.36598	2.14642	1.9677	1.67045	6.66882	5.05603	4.39312	3.29244
ENSG00000253729.7_3	PRKDC	chr8:48685669-48872743	-	protein_coding	1.04674	2.06586	0.034112	0.1008	5.62777	4.58103	47.6767	19.5676	17.5639	16.6576	57.0991	60.5909	36.3968	43.6671
ENSG00000158158.11_2	CNNM4	chr2:97426639-97477628	+	protein_coding	1.04664	2.06572	0.000602476	0.011243	2.09669	1.05005	1.1245	1.03176	1.00387	1.12513	2.85943	4.67369	2.40873	3.48421
ENSG00000101911.12_3	PRPS2	chrX:12809474-12842341	+	protein_coding	1.04587	2.06461	0.0104104	0.0487918	3.84662	2.80076	6.1128	6.07374	5.41218	6.30723	9.58883	24.5073	11.4774	11.7105
ENSG00000198589.10_3	LRBA	chr4:151185683-151936879	-	protein_coding	1.04566	2.06432	0.0030519	0.0248766	4.154	3.10833	8.50986	8.10418	6.80568	7.18432	17.9387	19.9777	10.6449	20.7105
ENSG00000006432.15_3	MAP3K9	chr14:71189243-71276251	-	protein_coding	1.04553	2.06412	0.00585713	0.0351255	1.54009	0.494561	0.258911	0.728426	0.327408	0.364145	3.30376	1.99602	0.982522	1.79793
ENSG00000178053.17_2	MLF1	chr3:158288952-158325041	+	protein_coding	1.04539	2.06392	0.0260288	0.0854578	2.78447	1.73909	1.42387	2.17986	3.44533	2.6245	3.23674	10.4938	4.92818	6.80594
ENSG00000053372.4_2	MRTO4	chr1:19578033-19586622	+	protein_coding	1.04532	2.06382	0.01061	0.0492712	3.70796	2.66265	5.56239	5.70817	4.58317	5.54033	13.6463	20.5098	8.46002	8.78537
ENSG00000004700.15_3	RECQL	chr12:21621845-21654603	-	protein_coding	1.04523	2.06369	0.0102323	0.0482095	4.88872	3.84349	17.7498	13.1301	10.3138	13.167	22.6088	44.3297	20.8958	31.8696
ENSG00000152240.12_2	HAUS1	chr18:43684298-43708299	+	protein_coding	1.04503	2.0634	0.0420144	0.11507	2.83929	1.79427	3.95884	1.60221	1.91344	2.84934	4.43484	12.7703	3.62716	6.57543
ENSG00000275764.1_4	AC092747.4	chr12:27190033-27191893	+	lincRNA	1.04477	2.06304	0.00415223	0.0290877	3.32101	2.27624	4.13354	3.64092	2.89456	4.93448	7.59167	6.66722	13.1396	9.7088
ENSG00000267313.7_2	KC6	chr18:39045747-39212149	-	lincRNA	1.04473	2.06298	0.0321471	0.0970965	1.07178	0.0270459	0	0.0778703	0	0	2.28909	1.66569	0	1.22671
ENSG00000182899.14_2	RPL35A	chr3:197676858-197683481	+	protein_coding	1.04442	2.06254	0.0053252	0.033199	5.69437	4.64995	38.0152	19.1581	19.4024	23.7589	45.2694	61.5366	45.4901	52.4463
ENSG00000182173.12_2	TSEN54	chr17:73512141-73520820	+	protein_coding	1.04442	2.06254	0.00396405	0.0283373	2.27265	1.22822	1.29468	2.03346	0.906278	1.2703	4.30099	5.57752	2.66719	3.2637
ENSG00000124574.14_4	ABCC10	chr6:43395104-43418168	+	protein_coding	1.04441	2.06252	0.00933178	0.045639	2.04132	0.996906	0.988492	1.09865	0.925511	0.974176	5.25193	1.50827	2.90799	3.68431
ENSG00000114867.20_3	EIF4G1	chr3:184032283-184053146	+	protein_coding	1.04402	2.06197	0.0011321	0.0152953	5.99619	4.95217	26.0368	29.1022	33.2772	31.9191	46.086	80.0295	63.7663	66.1819
ENSG00000261609.5_3	GAN	chr16:81348557-81424489	+	protein_coding	1.04392	2.06183	0.0027679	0.0238934	2.90401	1.86008	2.11765	3.17865	2.66515	2.63755	9.59086	4.56731	6.86977	5.76448
ENSG00000102780.16_3	DGKH	chr13:42614172-42830714	+	protein_coding	1.04359	2.06136	0.0194308	0.0709703	3.36518	2.32158	2.38646	5.04129	4.47984	4.56959	8.21086	16.9529	7.29906	7.21511
ENSG00000232956.8_2	SNHG15	chr7:45022622-45026560	-	lincRNA	1.04329	2.06092	0.00098356	0.0142533	2.4064	1.36311	1.63128	1.58172	1.51017	1.56781	4.29984	5.6574	4.89577	2.79739
ENSG00000127952.16_2	STYXL1	chr7:75625656-75677322	-	protein_coding	1.04308	2.06062	0.00199566	0.0202135	2.21458	1.1715	2.15497	1.05207	1.17987	0.823924	2.99413	4.58194	3.82127	3.31767
ENSG00000166012.16_3	TAF1D	chr11:93463114-93517557	-	protein_coding	1.0418	2.0588	0.0011451	0.0153248	3.89701	2.85521	7.64813	6.42923	6.5854	4.62558	17.7815	14.2467	11.8454	12.3909
ENSG00000119523.9_2	ALG2	chr9:101978708-101984238	-	protein_coding	1.04138	2.05819	0.00571933	0.0346239	3.03122	1.98984	4.49042	3.5142	2.31183	2.0322	7.95154	9.36733	6.43673	5.47158
ENSG00000197785.13_2	ATAD3A	chr1:1447531-1470067	+	protein_coding	1.04123	2.05798	0.0014216	0.0171105	3.61116	2.56993	4.04703	5.7352	5.54078	4.59098	10.8348	15.8028	9.19885	9.99443
ENSG00000261061.1_4	AC092718.4	chr16:81064375-81065090	+	sense_intronic	1.04073	2.05727	0.00141162	0.0170453	1.3477	0.306966	0.239291	0.145312	0.209166	0.36471	2.39931	1.1192	1.02432	1.87706
ENSG00000111667.13_2	USP5	chr12:6961292-6975796	+	protein_coding	1.04055	2.057	0.00232694	0.0218752	4.08412	3.04358	5.50371	7.89569	7.50929	8.38851	13.0508	12.6964	20.5077	18.9927
ENSG00000197056.9_2	ZMYM1	chr1:35525387-35581460	+	protein_coding	1.04037	2.05675	0.00443203	0.0301052	3.2373	2.19693	4.10977	3.712	2.85777	3.758	8.30238	13.5261	6.72989	6.57143
ENSG00000248359.1_3	AC010280.1	chr5:67827517-67829357	-	lincRNA	1.04025	2.05658	0.046325	0.122303	1.04025	0	0	0	0	0	3.84521	0.399037	0.579018	0.671299
ENSG00000165501.16_3	LRR1	chr14:50065415-50081390	+	protein_coding	1.0396	2.05565	0.0114815	0.0515343	1.90504	0.865447	0.721356	0.904345	0.587278	1.11755	3.19339	4.10493	1.14687	3.28094
ENSG00000130529.15_3	TRPM4	chr19:49660998-49715093	+	protein_coding	1.03905	2.05488	0.00497748	0.0320853	2.14652	1.10747	0.801349	1.33962	1.38486	1.14448	5.97813	3.09638	2.64526	2.6881
ENSG00000278540.4_3	ACACA	chr17:35441923-35766909	-	protein_coding	1.03868	2.05434	0.0102858	0.0484007	3.71638	2.67771	4.02083	6.24466	5.78223	5.79385	11.3362	20.8621	8.64285	10.4788
ENSG00000141198.15_4	TOM1L1	chr17:52976748-53039317	+	protein_coding	1.03836	2.05389	0.0242618	0.0816451	2.07621	1.03785	0.667651	1.02597	1.41214	1.18049	2.19851	5.70516	1.58629	4.70124
ENSG00000168234.12_3	TTC39C	chr18:21572737-21715574	+	protein_coding	1.03818	2.05364	0.00172978	0.0188174	2.57333	1.53515	2.48515	1.92924	1.47826	1.78856	4.83409	4.41011	3.83912	7.2159
ENSG00000152455.15_3	SUV39H2	chr10:14920819-14946314	+	protein_coding	1.03761	2.05283	0.00589683	0.0352408	2.03618	0.998565	0.715658	1.17612	1.3249	0.836003	2.84848	5.1468	1.86482	3.17606
ENSG00000104524.13_4	PYCR3	chr8:144686083-144691943	-	protein_coding	1.0376	2.05281	0.00563768	0.0343714	1.47449	0.436894	0.494425	0.312817	0.421911	0.203709	2.57473	2.80848	1.1098	1.07601
ENSG00000037897.16_3	METTL1	chr12:58162254-58166576	-	protein_coding	1.03736	2.05247	0.00985965	0.0471919	2.01728	0.979923	0.932032	1.23104	1.02021	0.737908	2.84899	5.79189	1.79792	2.67179
ENSG00000229152.2_3	ANKRD10-IT1	chr13:111546986-111551519	-	sense_intronic	1.03735	2.05246	0.0178541	0.067378	3.22684	2.18949	7.22057	2.22956	2.82774	3.26007	6.29753	8.79596	10.0114	8.75973
ENSG00000179222.17_3	MAGED1	chrX:51546103-51645453	+	protein_coding	1.03727	2.05234	0.00979857	0.0470075	3.18542	2.14815	3.34276	3.38029	3.21175	3.81835	8.96804	7.0547	4.86193	13.5523
ENSG00000049247.13_2	UTS2	chr1:7903143-7913572	-	protein_coding	1.03703	2.05199	0.0446267	0.119598	1.48559	0.448561	1.68987	0.211339	0	0.0644467	1.44557	2.92631	0.871887	2.4212
ENSG00000120889.12_2	TNFRSF10B	chr8:22877646-22926692	-	protein_coding	1.03666	2.05148	0.0394074	0.110674	3.1263	2.08964	5.03824	2.40016	3.375	2.65419	3.7594	14.2926	8.88083	7.08384
ENSG00000086544.2_2	ITPKC	chr19:41223008-41246765	+	protein_coding	1.03636	2.05105	0.0111394	0.05058	4.07415	3.03779	8.3041	5.83484	8.83609	6.27175	16.1161	9.43692	17.4157	23.4683
ENSG00000197982.13_3	C1orf122	chr1:38272651-38275126	+	protein_coding	1.03624	2.05087	0.00451008	0.0303136	2.32578	1.28954	1.73276	1.50423	1.25471	1.31418	4.2567	6.65211	3.14091	2.7925
ENSG00000119714.10_3	GPR68	chr14:91698876-91720269	-	protein_coding	1.03578	2.05022	0.0143478	0.058808	1.68358	0.647802	0.772415	0.520066	0.493961	0.497147	1.79803	1.81883	4.87221	1.29882
ENSG00000172590.18_2	MRPL52	chr14:23299088-23304246	+	protein_coding	1.03551	2.04983	8.25762e-05	0.005582	3.00945	1.97395	3.16895	3.18501	2.72393	2.66561	6.95979	8.4802	5.81498	7.17638
ENSG00000171792.10_3	RHNO1	chr12:2985424-2998689	+	protein_coding	1.03541	2.0497	0.0105642	0.0491726	2.30416	1.26875	1.27395	1.73052	1.10975	1.57317	2.69258	5.45762	2.47476	6.18061
ENSG00000141127.14_3	PRPSAP2	chr17:18743398-18834600	+	protein_coding	1.03466	2.04863	0.000481773	0.0101123	2.70495	1.67029	2.33334	2.56596	1.74328	2.14708	4.62376	7.24614	4.74137	5.78885
ENSG00000179832.17_2	MROH1	chr8:145202919-145316843	+	protein_coding	1.03453	2.04844	0.0036641	0.027319	2.14182	1.10729	1.2509	1.07828	1.18547	1.10719	5.47062	2.25061	3.9248	2.66187
ENSG00000188312.13_2	CENPP	chr9:95087766-95382815	+	protein_coding	1.03436	2.04821	0.00193075	0.0198349	1.82648	0.792118	0.861263	0.876123	0.612814	0.596435	3.46177	1.73003	3.39848	1.95343
ENSG00000278238.1_3	AL359513.1	chr13:53028910-53029466	-	lincRNA	1.03432	2.04815	0.00023616	0.00786759	1.03432	0	0	0	0	0	1.22302	0.836183	0.6943	1.54447
ENSG00000120256.9_2	LRP11	chr6:150139934-150185162	-	protein_coding	1.03308	2.04638	0.029257	0.0917902	4.05775	3.02468	9.51085	7.85034	5.30056	6.48338	13.5264	30.9534	13.765	10.2232
ENSG00000128311.13_3	TST	chr22:37406900-37416224	-	protein_coding	1.03293	2.04618	0.0476513	0.124716	2.12754	1.09461	1.95776	0.788941	0.877988	1.09311	4.81309	3.60221	1.04063	5.67848
ENSG00000105173.13_3	CCNE1	chr19:30302805-30315215	+	protein_coding	1.03265	2.04577	0.00651349	0.0372629	1.8081	0.775455	0.304405	0.93964	0.909429	0.777066	1.95582	4.46778	2.13175	1.97094
ENSG00000145107.15_3	TM4SF19	chr3:196046213-196065374	-	protein_coding	1.03248	2.04553	0.0328216	0.0982191	1.10498	0.0725043	0.177722	0.0381521	0	0	1.55972	0.244185	3.02875	0.668335
ENSG00000039650.11_3	PNKP	chr19:50363139-50381608	-	protein_coding	1.03226	2.04522	0.0013395	0.0165863	2.44618	1.41393	2.37993	1.50514	1.46747	1.41295	5.48149	4.27745	3.17643	5.17442
ENSG00000008988.9_2	RPS20	chr8:56979854-56987140	-	protein_coding	1.03191	2.04473	0.0207903	0.0742039	5.7907	4.75879	48.3821	19.8619	19.7912	24.0814	57.3083	70.5776	42.8044	50.366
ENSG00000270015.1_4	AC087481.3	chr15:31218717-31220610	+	sense_intronic	1.03189	2.0447	0.000212011	0.00760891	3.09127	2.05938	3.00526	2.96323	3.3067	3.41486	9.63277	7.35736	7.49774	5.98614
ENSG00000152749.7_2	GPR180	chr13:95254157-95286899	+	protein_coding	1.03185	2.04464	0.0315191	0.0959379	2.31874	1.2869	2.02009	1.46766	1.15825	1.20378	2.74264	9.34012	2.79506	3.21816
ENSG00000088812.17_3	ATRN	chr20:3451687-3631769	+	protein_coding	1.03164	2.04435	0.00437542	0.0298749	3.70314	2.6715	6.87309	5.65835	4.33787	4.88747	9.51525	13.0967	17.5819	9.44722
ENSG00000119231.10_3	SENP5	chr3:196594727-196661585	+	protein_coding	1.03158	2.04426	9.79321e-05	0.00578161	3.75003	2.71846	5.97587	5.83964	5.20651	5.33684	9.85905	13.8937	12.8538	13.6261
ENSG00000163961.4_2	RNF168	chr3:196195654-196230639	-	protein_coding	1.03146	2.04409	1.11624e-05	0.00277535	5.0225	3.99104	15.8552	14.7087	13.3147	15.8669	32.9396	34.0928	30.5069	28.7416
ENSG00000178075.19_3	GRAMD1C	chr3:113547029-113666021	+	protein_coding	1.03092	2.04333	0.00348635	0.0266873	1.33803	0.307112	0.398227	0.271318	0.159888	0.136454	1.87465	1.59536	0.67116	2.27606
ENSG00000117262.18_2	GPR89A	chr1:145764411-145827073	-	protein_coding	1.03075	2.04309	0.000631579	0.0115266	2.48624	1.45549	1.53602	1.79993	2.20778	1.48358	4.4668	6.19953	3.58834	4.45803
ENSG00000186889.9_3	TMEM17	chr2:62727356-62739029	-	protein_coding	1.03034	2.04251	0.00346382	0.0265921	1.4341	0.403754	0.29968	0.317535	0.115306	0.603896	0.834755	2.09194	1.80886	2.3457
ENSG00000143324.13_3	XPR1	chr1:180601140-180859387	+	protein_coding	1.03028	2.04243	0.00406521	0.0287209	3.33891	2.30862	3.80735	4.10402	3.99942	3.91044	6.55512	14.4741	9.57608	7.47754
ENSG00000156482.10_2	RPL30	chr8:99037079-99058697	-	protein_coding	1.02948	2.04129	0.0192787	0.0706917	5.51821	4.48873	37.5632	17.3371	15.4162	20.8872	50.9271	57.1853	32.3837	42.7362
ENSG00000140474.12_2	ULK3	chr15:75128457-75135687	-	protein_coding	1.02915	2.04083	0.00039669	0.00945114	2.41717	1.38802	1.88409	1.65648	1.74896	1.22769	4.18647	3.50457	4.18287	5.72152
ENSG00000124813.20_2	RUNX2	chr6:45295894-45632086	+	protein_coding	1.02891	2.04048	0.0106645	0.0494106	1.30566	0.276751	0.306006	0.369749	0.0692712	0.126076	2.21116	0.4491	1.53383	2.1669
ENSG00000124279.11_3	FASTKD3	chr5:7859272-7869150	-	protein_coding	1.02847	2.03986	0.00365304	0.027282	2.06396	1.03549	1.44757	1.08288	0.763087	0.964172	3.94127	3.6699	1.7624	3.79535
ENSG00000076770.14_3	MBNL3	chrX:131503345-131623996	-	protein_coding	1.02795	2.03912	0.0300562	0.093365	1.65222	0.624269	0.308015	0.584356	0.639048	0.662025	1.42072	1.96392	1.13084	5.38422
ENSG00000042088.13_3	TDP1	chr14:90421283-90511112	+	protein_coding	1.02759	2.03862	0.000592728	0.0112013	1.86105	0.833461	0.849664	1.0948	0.56731	0.660338	1.99378	3.54493	2.4281	2.73364
ENSG00000073605.18_3	GSDMB	chr17:38060848-38076107	-	protein_coding	1.02707	2.03788	0.00678479	0.0380953	1.68254	0.655473	0.82744	0.464	0.384524	0.661818	1.18368	2.13095	2.17947	3.88387
ENSG00000281469.1_3	AC019226.1	chr2:148801949-148802463	+	TEC	1.02589	2.03621	0.00829061	0.0427918	2.44204	1.41615	3.46534	1.12767	1.25298	1.36971	4.7097	3.70264	4.17316	5.27759
ENSG00000072506.12_3	HSD17B10	chrX:53458206-53461320	-	protein_coding	1.02556	2.03574	0.00834208	0.0428794	4.11588	3.09033	6.69288	7.15544	7.1499	9.29052	11.4001	21.646	12.3959	23.0232
ENSG00000156011.16_3	PSD3	chr8:18384811-18942240	-	protein_coding	1.02529	2.03536	0.0140514	0.0581147	2.94214	1.91685	3.94763	3.23838	2.14757	2.07996	10.8179	4.22644	5.78869	7.32059
ENSG00000136982.5_3	DSCC1	chr8:120846216-120868250	-	protein_coding	1.02454	2.03431	0.00856519	0.043467	3.1695	2.14496	2.9665	4.04951	3.61477	3.13988	6.42495	13.8001	5.66177	7.95183
ENSG00000132341.11_2	RAN	chr12:131356424-131362223	+	protein_coding	1.0243	2.03397	0.00172892	0.0188174	3.79615	2.77185	6.54404	5.52218	4.82627	6.59018	10.8236	18.6211	11.6753	11.6646
ENSG00000261008.6_3	LINC01572	chr16:72317200-72698908	-	lincRNA	1.0239	2.03341	1.65573e-05	0.00321107	1.21794	0.19404	0.0663417	0.277618	0.133246	0.109241	1.24966	1.15743	1.61888	1.30345
ENSG00000112306.7_2	RPS12	chr6:133135580-133138703	+	protein_coding	1.02371	2.03314	0.00746849	0.0402281	8.52695	7.50323	281.597	149.487	138.126	182.113	352.668	414.378	295.451	424.086
ENSG00000143643.12_3	TTC13	chr1:231041989-231114621	-	protein_coding	1.02291	2.03202	0.0018851	0.0196283	3.4495	2.42659	4.60285	4.31548	4.19393	4.40075	7.42547	13.5692	8.01374	11.873
ENSG00000269974.1_4	AC091057.3	chr15:30941000-30941732	+	lincRNA	1.02285	2.03193	0.00329839	0.0258852	1.11858	0.0957349	0.004759	0.218505	0	0.065092	0.67801	1.67674	0.71514	1.88542
ENSG00000197070.13_3	ARRDC1	chr9:140500106-140509812	+	protein_coding	1.02269	2.0317	0.000607105	0.011299	2.10137	1.07868	1.58116	0.941169	0.916678	1.07222	3.17435	2.75068	4.46359	2.9639
ENSG00000119396.10_3	RAB14	chr9:123940415-123985292	-	protein_coding	1.02197	2.03069	0.000255316	0.00814223	4.81778	3.79582	14.4524	13.2073	11.2855	12.7948	30.459	26.2423	31.2727	21.8751
ENSG00000281649.1_2	EBLN3P	chr9:37079854-37090504	+	lincRNA	1.02183	2.0305	0.035222	0.102915	3.18822	2.16638	6.77394	2.1112	4.69778	1.94653	11.2224	7.49653	6.13925	8.30989
ENSG00000124207.16_2	CSE1L	chr20:47662783-47713497	+	protein_coding	1.02176	2.03039	0.010167	0.0480335	5.12834	4.10659	12.3603	19.0199	16.5678	17.7426	28.3769	55.4473	25.0452	33.6551
ENSG00000130734.9_2	ATG4D	chr19:10654571-10664094	+	protein_coding	1.02151	2.03004	0.00113906	0.0153074	2.27244	1.25093	1.53268	1.26451	1.08117	1.68789	4.00271	2.83013	3.4571	5.38002
ENSG00000197312.11_3	DDI2	chr1:15943995-15995539	+	protein_coding	1.02095	2.02926	0.000651374	0.0116503	3.39188	2.37093	5.41568	3.72933	3.45979	4.29087	10.9537	7.50915	9.5199	10.3458
ENSG00000134333.13_3	LDHA	chr11:18415935-18429972	+	protein_coding	1.02091	2.0292	0.026975	0.0874354	5.03294	4.01203	15.9787	15.4967	18.0698	11.6856	21.7132	31.2148	61.4488	24.1423
ENSG00000168282.5_2	MGAT2	chr14:50087513-50090199	+	protein_coding	1.0207	2.0289	0.00446944	0.0301944	3.70264	2.68193	7.18465	5.73154	4.4731	4.62372	10.9043	17.7802	9.19204	11.6111
ENSG00000154447.14_3	SH3RF1	chr4:170015407-170192256	-	protein_coding	1.02067	2.02886	0.0229582	0.0786959	3.49388	2.47321	4.54184	4.7927	4.69336	4.20161	11.7713	16.8617	10.9287	4.9197
ENSG00000013306.15_3	SLC25A39	chr17:42396993-42402238	-	protein_coding	1.02063	2.0288	0.0320185	0.0968519	2.41304	1.39241	3.05262	1.22947	1.41046	1.18068	3.70416	8.78857	2.80935	3.58709
ENSG00000128699.13_3	ORMDL1	chr2:190635049-190649097	-	protein_coding	1.0206	2.02876	0.0217268	0.0764488	2.77109	1.75049	4.32454	2.55014	1.26445	1.99438	4.19561	6.11964	9.04843	4.84157
ENSG00000067955.13_3	CBFB	chr16:67063019-67134961	+	protein_coding	1.02047	2.02858	0.00490656	0.0317823	3.89833	2.87786	10.7949	5.40595	5.28442	5.14814	14.9066	12.5993	15.0772	13.2151
ENSG00000020256.19_3	ZFP64	chr20:50668202-50820847	-	protein_coding	1.02016	2.02815	0.000957699	0.0140423	2.18677	1.16661	1.18345	1.59901	1.18076	1.052	4.28022	4.4361	2.43221	3.36134
ENSG00000130787.13_2	HIP1R	chr12:123319000-123347507	+	protein_coding	1.01942	2.02711	0.0112509	0.0508818	2.90418	1.88475	2.17343	3.04838	2.29893	3.3882	8.67958	3.60471	6.08136	8.94958
ENSG00000143811.18_3	PYCR2	chr1:226107577-226112040	-	protein_coding	1.01925	2.02687	0.00611713	0.0359807	3.6257	2.60644	4.74831	5.80129	4.67754	5.19694	8.01982	18.7099	10.2806	10.576
ENSG00000172893.15_3	DHCR7	chr11:71139239-71163914	-	protein_coding	1.01923	2.02684	0.0160838	0.0630473	1.7844	0.765164	1.49754	0.671858	0.26929	0.574263	3.23137	2.58017	1.16946	3.28443
ENSG00000101144.12_2	BMP7	chr20:55743804-55841685	-	protein_coding	1.01911	2.02667	0.0397948	0.111315	1.75196	0.732852	1.38871	0.281342	0.67331	0.489488	5.13576	2.55984	0.972132	1.98772
ENSG00000137955.15_3	RABGGTB	chr1:76251882-76260764	+	protein_coding	1.01872	2.02612	0.000716469	0.0121631	3.19662	2.1779	4.44811	3.74757	2.93294	3.12119	8.1578	8.52588	6.35723	10.008
ENSG00000070501.11_2	POLB	chr8:42195972-42229326	+	protein_coding	1.01855	2.02589	0.0017839	0.0190706	2.47135	1.4528	2.46529	1.61239	1.13201	1.90924	3.57814	4.99064	4.12023	5.73527
ENSG00000147669.10_2	POLR2K	chr8:101162812-101166230	+	protein_coding	1.01778	2.0248	0.00523203	0.0329301	4.02138	3.0036	6.41	6.81861	6.38409	8.67051	15.8551	23.0262	10.5672	13.845
ENSG00000124171.8_2	PARD6B	chr20:49348081-49373332	+	protein_coding	1.01764	2.0246	0.0323571	0.0974939	2.45069	1.43305	0.827179	2.65252	1.46557	2.23055	6.50143	3.52725	2.37672	6.78846
ENSG00000008517.16_4	IL32	chr16:3115298-3132193	+	protein_coding	1.01724	2.02405	0.0279482	0.0891386	3.47024	2.45299	5.84175	4.28541	5.1068	3.07043	10.0425	5.28251	11.0477	17.0499
ENSG00000159314.11_3	ARHGAP27	chr17:43471268-43511787	-	protein_coding	1.01722	2.02401	0.0429113	0.116607	2.15647	1.13925	3.09065	1.42355	0.540609	0.541195	5.36626	2.66378	2.35113	4.05403
ENSG00000159147.17_3	DONSON	chr21:34931848-34961014	-	protein_coding	1.01709	2.02383	0.00330842	0.0259104	2.20438	1.18729	1.58761	1.27667	1.05455	1.2219	2.60101	5.76778	2.85682	3.79991
ENSG00000030582.17_3	GRN	chr17:42422454-42430470	+	protein_coding	1.01696	2.02365	0.037397	0.107071	3.54199	2.52503	10.4537	4.64345	2.86468	3.3938	11.5165	7.67986	10.7989	13.3597
ENSG00000179604.9_2	CDC42EP4	chr17:71279763-71308314	-	protein_coding	1.01656	2.02309	0.0089612	0.0446265	3.87844	2.86188	9.83092	5.67107	4.83101	5.62898	14.3495	17.3487	9.26765	15.1785
ENSG00000048140.17_3	TSPAN17	chr5:176074388-176086055	+	protein_coding	1.01624	2.02264	0.00165007	0.0184876	2.25591	1.23967	1.72942	1.67723	1.12963	0.998243	2.63268	3.73897	4.06287	4.97137
ENSG00000228300.13_3	C19orf24	chr19:1275437-1279248	+	protein_coding	1.01622	2.02261	0.00698107	0.0386959	2.15152	1.1353	2.09683	1.34092	0.687801	0.902871	2.96442	4.43286	2.40249	4.31714
ENSG00000275216.1_3	AL161431.1	chr13:109921982-109926186	+	lincRNA	1.01567	2.02184	0.0205079	0.0735712	1.04368	0.0280139	0.013551	0.055559	0	0.010192	1.03385	1.01141	2.64443	0.211346
ENSG00000165209.18_3	STRBP	chr9:125871779-126030855	-	protein_coding	1.01506	2.02099	0.0145723	0.0593259	3.24212	2.22706	1.55703	5.20306	4.66382	4.3481	9.28522	8.41707	7.60666	8.61479
ENSG00000143106.12_2	PSMA5	chr1:109941653-109969049	-	protein_coding	1.01463	2.02039	0.00129479	0.0163477	3.74933	2.7347	5.12499	6.16191	5.302	6.10062	10.3199	15.8493	9.67866	15.0584
ENSG00000164484.11_3	TMEM200A	chr6:130686879-130764208	+	protein_coding	1.0145	2.02021	0.0294053	0.092162	1.66004	0.645541	1.12245	0.498529	0.271401	0.480891	2.29811	1.35289	1.20572	4.82739
ENSG00000184058.13_3	TBX1	chr22:19744226-19771116	+	protein_coding	1.01415	2.01971	0.0182478	0.0682173	1.27343	0.259284	0.10065	0.298717	0.255292	0.143668	1.47475	3.25354	1.14952	0.509184
ENSG00000126953.5_2	TIMM8A	chrX:100600649-100604184	-	protein_coding	1.01405	2.01958	0.00336843	0.0262152	2.13513	1.12107	1.81275	0.989503	0.967397	1.033	4.68038	4.17181	2.54943	2.57082
ENSG00000143537.13_3	ADAM15	chr1:155023042-155035251	+	protein_coding	1.01369	2.01907	0.00655202	0.0373688	2.16354	1.14985	2.58755	0.990525	0.747447	0.942615	3.40744	4.11694	3.60866	2.87603
ENSG00000136891.13_2	TEX10	chr9:103064359-103115221	-	protein_coding	1.01349	2.01879	0.000244319	0.00800387	2.56193	1.54844	2.3824	1.91044	1.80772	1.64829	5.87625	4.04569	5.51284	4.38051
ENSG00000213551.4_3	DNAJC9	chr10:74943120-75008620	-	protein_coding	1.01337	2.01861	9.28553e-05	0.00562156	3.69001	2.67664	5.01646	6.00129	5.01653	5.59372	12.7499	13.4206	9.65592	12.1321
ENSG00000107566.13_3	ERLIN1	chr10:101909851-101948091	-	protein_coding	1.01274	2.01774	0.0261925	0.0857812	3.02112	2.00839	6.49377	1.92263	2.45123	2.46648	6.53603	5.1332	9.22585	8.18897
ENSG00000121073.13_2	SLC35B1	chr17:47778305-47786376	-	protein_coding	1.01258	2.01752	0.000995797	0.014347	1.7949	0.782314	1.1577	0.799824	0.417724	0.589234	2.57948	3.17353	1.89414	2.35296
ENSG00000148459.15_3	PDSS1	chr10:26986588-27035727	+	protein_coding	1.01224	2.01705	0.00621693	0.0362722	2.74014	1.72789	2.52451	2.38624	2.65262	1.76166	5.53059	9.51641	4.55929	4.21932
ENSG00000169612.3_3	FAM103A1	chr15:83654959-83659809	+	protein_coding	1.01159	2.01613	0.000113996	0.00599489	3.30567	2.29408	3.71932	3.93451	3.85467	4.11764	8.79048	9.82897	6.98709	10.2887
ENSG00000130299.16_3	GTPBP3	chr19:17445729-17453544	+	protein_coding	1.01102	2.01533	0.000158061	0.00690192	1.40763	0.396607	0.409035	0.330437	0.269536	0.261831	2.11895	1.21167	1.44538	1.9368
ENSG00000111641.11_3	NOP2	chr12:6666029-6677857	-	protein_coding	1.01099	2.0153	0.00175824	0.0189692	3.0983	2.0873	2.93955	3.75704	3.55438	2.82077	5.66353	10.8588	7.15896	7.34338
ENSG00000114956.19_2	DGUOK	chr2:74153953-74186088	+	protein_coding	1.01078	2.01499	0.00379502	0.0277361	2.91628	1.90551	4.46178	2.39563	2.02991	2.50568	5.89479	8.6098	6.25214	5.75851
ENSG00000105865.10_2	DUS4L	chr7:107203929-107218909	+	protein_coding	1.01048	2.01458	0.00100104	0.0143629	1.83642	0.825943	0.63377	0.701056	0.726372	1.05821	3.3032	2.60321	2.95881	1.6499
ENSG00000123352.17_3	SPATS2	chr12:49760367-49921207	+	protein_coding	1.01007	2.01401	0.0217482	0.076476	2.80696	1.79689	2.54539	2.76962	2.18045	2.42946	5.02527	9.92541	2.99252	8.12556
ENSG00000184840.11_2	TMED9	chr5:177019159-177023125	+	protein_coding	1.00893	2.01241	0.00700971	0.0387253	4.75158	3.74265	13.0817	19.8683	9.3872	9.51865	22.4252	30.2471	26.2822	25.3692
ENSG00000106268.15_3	NUDT1	chr7:2281857-2290781	+	protein_coding	1.00871	2.01211	0.000938806	0.0139019	2.38925	1.38054	1.87253	1.65061	1.28468	1.64177	3.81993	3.70248	3.62483	6.18582
ENSG00000142867.12_2	BCL10	chr1:85731931-85742773	-	protein_coding	1.00861	2.01197	0.0154821	0.0615041	3.48797	2.47936	9.07348	3.84681	3.99469	2.96557	8.82445	10.2688	10.9217	11.0063
ENSG00000141527.16_3	CARD14	chr17:78143791-78183130	+	protein_coding	1.00854	2.01188	0.000716308	0.0121631	1.05465	0.0461115	0.0422982	0.082585	0.00709348	0	1.78131	0.702413	0.832458	1.14575
ENSG00000121594.11_3	CD80	chr3:119243140-119278449	-	protein_coding	1.00853	2.01186	0.0195135	0.0711679	1.05376	0.0452303	0.0537522	0.0352173	0.0126128	0.0262407	0.57461	0.47726	1.05407	2.88695
ENSG00000166226.12_2	CCT2	chr12:69979114-69995350	+	protein_coding	1.00843	2.01172	0.00987118	0.0472242	4.72384	3.71541	10.9693	13.3653	12.3309	11.9886	18.2906	43.9945	23.264	22.1531
ENSG00000136937.12_3	NCBP1	chr9:100395908-100436030	+	protein_coding	1.00842	2.01171	4.35703e-05	0.00482617	3.65444	2.64602	5.23966	5.56409	5.01726	5.22865	12.6391	13.0152	11.4653	9.55105
ENSG00000116586.11_2	LAMTOR2	chr1:156024543-156028301	+	protein_coding	1.00822	2.01142	0.00773008	0.041054	3.59703	2.58881	6.24898	4.4679	5.21678	4.31589	9.63452	18.6761	8.74884	9.51096
ENSG00000267710.6_4	EDDM13	chr19:56784138-56821819	+	protein_coding	1.00797	2.01107	0.0483912	0.125975	1.02818	0.0202164	0	0.0576523	0	0	1.53605	0.0120332	2.82909	0.760378
ENSG00000070756.15_3	PABPC1	chr8:101698044-101735037	-	protein_coding	1.00767	2.01067	5.15104e-05	0.00502793	7.4713	6.46362	96.7448	90.7771	76.7563	85.9787	191.179	191.62	167.669	157.816
ENSG00000116237.15_2	ICMT	chr1:6281253-6296032	-	protein_coding	1.00674	2.00937	0.0123995	0.0540395	3.4667	2.45996	5.05566	4.80574	4.4792	3.75719	8.54353	18.4888	8.42688	7.52049
ENSG00000167904.14_3	TMEM68	chr8:56608983-56685966	-	protein_coding	1.00654	2.00909	0.0046259	0.0306644	1.97036	0.963816	1.26516	0.798383	0.614846	1.20007	3.61247	4.28982	2.06645	2.15162
ENSG00000111640.14_2	GAPDH	chr12:6643093-6647540	+	protein_coding	1.00642	2.00892	0.00706571	0.0389206	7.16676	6.16034	54.0953	79.3666	73.2097	78.6418	92.5312	163.675	184.329	148.317
ENSG00000136754.17_4	ABI1	chr10:27035522-27150016	-	protein_coding	1.00605	2.00841	5.22146e-05	0.00503578	4.23636	3.23031	9.16544	8.53244	7.38007	8.55223	20.174	15.6554	16.7834	19.1242
ENSG00000074842.7_3	MYDGF	chr19:4641386-4670382	-	protein_coding	1.00576	2.008	0.0434933	0.117688	3.76724	2.76148	8.31475	5.87643	5.01601	4.48662	9.24995	24.7706	7.40599	14.4799
ENSG00000173085.13_3	COQ2	chr4:84182689-84206067	-	protein_coding	1.00533	2.0074	0.0101327	0.0479421	2.83825	1.83292	4.62712	2.1197	2.18569	1.88042	8.13358	6.71462	4.44451	5.81837
ENSG00000075711.20_3	DLG1	chr3:196769431-197026171	-	protein_coding	1.005	2.00694	0.000142147	0.00661233	4.5931	3.5881	9.06044	12.3384	11.3429	11.6289	21.6792	23.717	20.8049	26.7629
ENSG00000264608.1_4	AC005726.4	chr17:26928845-26929302	-	sense_intronic	1.00479	2.00666	0.0119114	0.0528593	1.82768	0.822884	2.01178	0.749658	0.338697	0.388007	3.08845	2.22773	2.24172	2.71117
ENSG00000258210.1_4	AC144548.2	chr12:110825268-110883353	-	processed_transcript	1.00468	2.0065	0.0189385	0.069845	1.50238	0.497702	0.513507	0.538175	0.432755	0.191601	3.32434	0.81943	1.16209	2.78723
ENSG00000127948.15_3	POR	chr7:75528518-75616173	+	protein_coding	1.00457	2.00634	0.0168023	0.0647241	3.23111	2.22654	6.83242	3.14902	2.76163	2.92468	12.0998	8.73482	7.04706	6.57546
ENSG00000173852.14_3	DPY19L1	chr7:34968488-35077883	-	protein_coding	1.00388	2.00539	0.0415978	0.114383	3.04555	2.04167	3.85311	3.50318	2.30532	2.97796	6.35073	16.4085	4.47941	5.62802
ENSG00000283761.1_2	AC118553.2	chr1:100435567-100548877	+	protein_coding	1.00371	2.00515	0.033697	0.0999697	1.51637	0.512657	0.883357	0.26386	0.380371	0.260879	1.18906	1.08108	1.56917	4.72207
ENSG00000087253.12_3	LPCAT2	chr16:55542910-55620582	+	protein_coding	1.00369	2.00512	0.025737	0.0848734	2.12054	1.11685	3.04867	0.987039	0.663181	0.653366	3.83898	3.35312	4.21164	2.25731
ENSG00000243708.10_3	PLA2G4B	chr15:42129973-42140345	+	protein_coding	1.00343	2.00476	0.0165269	0.0640661	1.59487	0.591439	0.972489	0.469391	0.0982524	0.619232	3.19255	0.859146	2.34656	2.19172
ENSG00000124787.13_2	RPP40	chr6:4994966-5004297	-	protein_coding	1.0033	2.00459	0.000847494	0.0131162	2.00399	1.00069	1.11322	1.19862	0.882681	0.832647	3.40458	3.73553	1.96184	3.19001
ENSG00000274364.1_4	AL110115.1	chr20:30123066-30123429	+	sense_intronic	1.00311	2.00432	0.00456712	0.0304663	1.38298	0.379866	0.782714	0.296228	0.180406	0.051018	2.15574	1.09848	1.21827	2.14957
ENSG00000111639.7_2	MRPL51	chr12:6601052-6603007	-	protein_coding	1.00299	2.00415	0.00100948	0.0144234	5.16477	4.16178	15.6543	18.6551	15.2237	18.3253	26.9132	43.4224	31.6677	39.8761
ENSG00000135587.8_3	SMPD2	chr6:109761966-109765122	+	protein_coding	1.00258	2.00359	0.0299426	0.0931395	1.93579	0.933209	1.87343	0.734337	0.606666	0.660492	1.42085	3.46228	2.2	5.19804
ENSG00000173137.11_2	ADCK5	chr8:145596790-145618457	+	protein_coding	1.00253	2.00351	0.00347584	0.0266434	1.72636	0.723826	0.623267	0.501538	0.51341	1.01693	3.19275	1.66542	3.1282	1.59846
ENSG00000241468.7_3	ATP5J2	chr7:99046098-99063954	-	protein_coding	1.00125	2.00173	0.00105411	0.0147688	4.05219	3.05095	5.78833	8.03468	7.98256	7.56308	18.4186	18.7772	12.9694	13.1177
ENSG00000088451.10_2	TGDS	chr13:95226305-95248511	-	protein_coding	1.00041	2.00057	0.0140659	0.0581531	2.35132	1.35091	1.79599	1.70982	1.01864	1.76768	2.71317	7.58236	3.10872	4.17855
ENSG00000160972.9_3	PPP1R16A	chr8:145703352-145727504	+	protein_coding	1.00024	2.00034	0.00531911	0.0331888	1.85953	0.859288	0.907447	0.920405	0.511433	0.956371	4.64088	2.04251	1.93901	2.43811
ENSG00000108256.8_2	NUFIP2	chr17:27582854-27621136	-	protein_coding	1.00015	2.00021	0.000355479	0.00908631	4.64018	3.64003	13.0623	11.3449	10.7515	10.8414	21.6842	29.5622	19.7551	25.8723
ENSG00000173726.10_2	TOMM20	chr1:235272651-235292251	-	protein_coding	1.00005	2.00007	0.00389424	0.0281167	5.0566	4.05655	19.0198	14.2005	12.2695	17.9846	26.8774	44.33	26.4526	34.3619
ENSG00000076258.9_2	FMO4	chr1:171283347-171311223	+	protein_coding	0.999974	1.99996	0.0245055	0.0821562	2.34616	1.34618	2.46433	1.3482	1.19801	1.33657	7.73986	4.37349	2.26123	3.36425
ENSG00000151287.16_2	TEX30	chr13:103418340-103426161	-	protein_coding	0.999694	1.99958	0.0409459	0.113293	2.26885	1.26916	2.19374	1.50108	0.751107	1.41256	2.3513	8.03118	2.33347	4.34705
ENSG00000280069.1_4	AC127024.8	chr17:29065200-29067293	+	TEC	0.999658	1.99953	0.00020992	0.00760891	2.01441	1.01475	1.3406	0.966478	0.820959	0.988704	3.49302	3.01318	3.4383	2.32929
ENSG00000169683.7_3	LRRC45	chr17:79981178-79989027	+	protein_coding	0.999242	1.99895	0.00638509	0.0368347	2.83678	1.83754	2.47814	2.39482	2.32767	3.15251	8.72798	8.09422	4.10829	4.76444
ENSG00000141552.17_3	ANAPC11	chr17:79848666-79858867	+	protein_coding	0.999213	1.99891	0.00484209	0.0315088	2.56148	1.56227	2.14203	1.67965	1.90898	2.1055	4.39575	7.84943	3.19903	5.05645
ENSG00000161671.16_4	EMC10	chr19:50979657-50994127	+	protein_coding	0.9991	1.99875	0.0104099	0.0487918	2.58405	1.58495	1.45287	3.04187	2.49449	1.33789	6.43285	3.07243	5.39268	5.68049
ENSG00000054392.12_3	HHAT	chr1:210501596-210849638	+	protein_coding	0.998952	1.99855	0.0217267	0.0764488	1.56442	0.565466	0.605658	0.574442	0.448456	0.309796	2.30016	3.76393	0.647616	1.95386
ENSG00000106077.18_2	ABHD11	chr7:73150424-73153197	-	protein_coding	0.998799	1.99834	0.00126733	0.0161852	2.27583	1.27703	1.26258	1.50458	1.36584	1.57262	5.13879	4.71351	2.81228	3.11342
ENSG00000213585.10_2	VDAC1	chr5:133307606-133340824	-	protein_coding	0.99875	1.99827	0.00435831	0.0298376	5.39898	4.40023	17.4441	23.7079	20.7789	19.0296	28.9576	48.0892	56.1261	36.7302
ENSG00000105202.8_4	FBL	chr19:40325098-40337054	-	protein_coding	0.998267	1.9976	0.00611698	0.0359807	4.02026	3.02199	9.08312	6.37601	6.29215	7.02729	12.5957	20.3276	10.6771	19.4735
ENSG00000197157.10_3	SND1	chr7:127292234-127732661	+	protein_coding	0.998258	1.99759	0.00383222	0.0278849	4.32199	3.32374	12.3376	8.87211	7.43054	8.05387	24.8033	13.8703	19.3852	19.4592
ENSG00000115750.16_2	TAF1B	chr2:9983483-10074545	+	protein_coding	0.998249	1.99757	0.00739695	0.0399582	3.17069	2.17244	4.79679	3.34275	2.93885	3.16447	5.68857	8.96507	6.49742	12.1573
ENSG00000233844.1_3	KCNQ5-IT1	chr6:73340223-73388282	+	sense_intronic	0.997391	1.99639	0.010915	0.0500251	1.15024	0.152853	0	0.150517	0.191644	0.114329	2.32163	0.38356	1.03814	1.59089
ENSG00000232116.2	RP11-187C18.2	chr9:45484572-45488153	+	lincRNA	0.997378	1.99637	0.0326897	0.0980828	1.62046	0.623079	0.469648	0.567967	0.748208	0.396749	4.02182	0.556903	2.31013	2.45348
ENSG00000148362.10_3	PAXX	chr9:139886870-139888436	+	protein_coding	0.997353	1.99633	0.00700581	0.0387241	3.0054	2.00805	5.30083	2.69654	2.36245	2.34257	7.47534	8.68849	5.55279	6.72721
ENSG00000277559.1_3	AC018553.1	chr16:54324877-54326334	+	lincRNA	0.99721	1.99614	0.00172365	0.0188039	0.99721	0	0	0	0	0	1.46716	0.371837	1.13238	1.19987
ENSG00000127564.16_3	PKMYT1	chr16:3018025-3030540	-	protein_coding	0.99708	1.99596	0.00110748	0.0151243	1.03018	0.0330992	0	0.078184	0	0.0166292	1.01906	0.717608	0.758744	1.85223
ENSG00000126003.6_2	PLAGL2	chr20:30780306-30795594	-	protein_coding	0.996739	1.99548	0.00239049	0.0221481	2.45313	1.45639	1.74049	1.8581	1.8165	1.57069	4.60463	6.52802	2.88203	4.48999
ENSG00000160606.10_2	TLCD1	chr17:27051366-27054953	-	protein_coding	0.996383	1.99499	0.0131877	0.0559597	1.03439	0.0380082	0.111134	0	0	0	1.75895	1.71007	0.187833	0.98176
ENSG00000256433.2_3	AC005840.3	chr12:6503071-6505314	+	lincRNA	0.996351	1.99495	0.0245791	0.0823413	1.28323	0.286878	0.247167	0.413386	0.013712	0.239753	1.00293	2.25847	2.74405	0.43595
ENSG00000173214.5_3	MFSD4B	chr6:111580551-111592370	+	protein_coding	0.996297	1.99487	0.0020137	0.0202987	2.5552	1.55891	2.53963	2.29186	1.89833	1.23133	6.23427	4.52208	3.83047	5.18423
ENSG00000100263.13_3	RHBDD3	chr22:29655841-29664198	-	protein_coding	0.996235	1.99479	0.00220854	0.0212908	1.98431	0.98807	1.05895	1.11353	0.831427	0.942273	2.70811	4.16602	1.82451	3.52991
ENSG00000127989.13_2	MTERF1	chr7:91321323-91510034	-	protein_coding	0.995539	1.99383	0.0398389	0.111424	2.46107	1.46553	2.46252	1.81682	1.3718	1.51446	9.86192	2.28229	3.7373	4.44259
ENSG00000084733.10_2	RAB10	chr2:26256976-26360323	+	protein_coding	0.995467	1.99373	0.00540495	0.0335095	6.32152	5.32606	35.3667	46.1245	36.4103	39.3894	56.898	88.7124	67.3003	114.327
ENSG00000114491.13_2	UMPS	chr3:124449213-124468120	+	protein_coding	0.995282	1.99347	0.000172405	0.00705251	2.74767	1.75239	2.35171	2.81194	2.12571	2.22645	6.46429	6.26043	4.45244	5.88628
ENSG00000092820.17_2	EZR	chr6:159186773-159240444	-	protein_coding	0.995135	1.99327	0.00351556	0.0267326	7.16856	6.17342	53.3881	78.6972	99.5581	61.2558	123.439	154.491	136.121	160.452
ENSG00000158169.12_3	FANCC	chr9:97861336-98189078	-	protein_coding	0.994958	1.99302	1.29685e-05	0.00290793	1.41977	0.424811	0.403835	0.419612	0.240047	0.314012	1.80333	1.80367	1.35299	1.77044
ENSG00000174292.12_3	TNK1	chr17:7283853-7293093	+	protein_coding	0.994842	1.99286	5.46238e-05	0.00503952	1.69468	0.699834	0.517949	0.565894	0.526723	0.918247	1.99046	2.58758	2.28305	2.11729
ENSG00000129219.13_2	PLD2	chr17:4710391-4726729	+	protein_coding	0.994058	1.99178	0.0310634	0.0950682	2.32249	1.32843	3.60726	1.13325	0.740692	1.32477	3.77836	2.75606	4.03465	5.9274
ENSG00000165271.16_3	NOL6	chr9:33461439-33473928	-	protein_coding	0.994037	1.99175	0.000895231	0.0134978	2.18614	1.1921	1.65469	1.19182	1.30148	1.03522	4.57462	3.78153	2.47817	3.62639
ENSG00000123179.13_2	EBPL	chr13:50234859-50265611	-	protein_coding	0.994011	1.99171	0.0302208	0.0935516	2.81638	1.82237	2.71601	1.76176	2.74478	3.07067	3.854	8.55709	3.67375	10.3546
ENSG00000197774.12_2	EME2	chr16:1823208-1831709	+	protein_coding	0.993725	1.99132	0.0280158	0.0892573	1.34412	0.350395	0.472097	0.143772	0.201029	0.306436	3.07959	0.534713	2.44921	0.923618
ENSG00000184897.5_2	H1FX	chr3:129033614-129035120	-	protein_coding	0.993499	1.99101	0.0255474	0.0845096	5.17545	4.18195	25.3189	14.8903	11.9138	19.0962	32.2694	24.2392	33.6629	57.5969
ENSG00000156162.16_2	DPY19L4	chr8:95731931-95806064	+	protein_coding	0.993497	1.99101	0.0175032	0.0664125	3.64851	2.65501	6.74124	4.61547	4.57141	5.49814	14.8631	18.2882	8.47328	7.53217
ENSG00000198466.11_3	ZNF587	chr19:58361225-58376480	+	protein_coding	0.99345	1.99094	0.0130739	0.0556561	2.81849	1.82505	3.68788	2.854	1.46505	2.53883	8.88797	5.83199	3.8981	6.48384
ENSG00000154319.14_3	FAM167A	chr8:11278972-11332224	-	protein_coding	0.992932	1.99023	0.0421314	0.115243	1.07361	0.0806794	0.125653	0.0617663	0.0377806	0.00834418	2.50473	0.102307	0.69258	2.0009
ENSG00000197182.14_3	MIRLET7BHG	chr22:46449749-46509808	+	lincRNA	0.992832	1.99009	0.00993754	0.0474301	2.15346	1.16063	2.04196	1.14474	0.971464	0.941844	2.3261	4.82289	4.76208	2.51049
[truncated: 1,698 more rows]

## Sheet: down_T_vs_N
#log2FC <= -0.585 #p-value cut-off <= 0.05 #q-value cut-off <= 1.00 #Gene biotype: processed_transcript,lincRNA,3prime_overlapping_ncrna,antisense,non_coding,sense_intronic,sense_overlapping,TEC,known_ncrna,macro_lncRNA,bidirectional_promoter_lncrna,ncRNA,protein_coding #Condition pair: down_T_vs_N Column A: Track_id, The database name in gene level. Column B: Gene_Name, The name of gene. Column …
Annotation					DE Statistic				FPKM
Track_id	Gene_Name	Locus	Strand	Gene_Type	log2FC	Fold_Change	p_value	q_value	T_FPKM	N_FPKM	N-1	N-2	N-3	N-4	T-1	T-2	T-3	T-4
ENSG00000034971.16_3	MYOC	chr1:171604557-171621823	-	protein_coding	-5.17505	0.0276792	9.12983e-05	0.00562156	0.687787	5.86284	119.07	32.323	58.7393	46.9871	0.779483	0.0526811	2.41852	0.0513535
ENSG00000143196.4_2	DPT	chr1:168664697-168698502	-	protein_coding	-4.70521	0.0383345	0.000348824	0.0090755	2.09645	6.80166	151.766	107.345	102.103	89.7629	6.39842	0.891964	9.86572	1.1992
ENSG00000163815.5_3	CLEC3B	chr3:45043040-45077563	+	protein_coding	-4.62737	0.0404596	7.36356e-05	0.00540195	1.45385	6.08123	148.531	63.6579	34.0151	61.0757	1.81806	0.997717	3.07793	1.45297
ENSG00000133392.17_3	MYH11	chr16:15797029-15950890	-	protein_coding	-4.56921	0.0421241	0.00652045	0.0372656	5.83162	10.4008	199.502	2559.22	2495.53	2605.86	60.9306	29.3869	193.725	27.705
ENSG00000168079.16_3	SCARA5	chr8:27727399-27850244	-	protein_coding	-4.56463	0.0422581	0.000672328	0.0118311	0.837972	5.4026	134.04	29.8157	19.3617	36.7859	0.285679	0.248648	3.03539	0.576016
ENSG00000004799.7_2	PDK4	chr7:95212811-95225803	-	protein_coding	-4.45266	0.0456683	0.000143888	0.00663858	1.58168	6.03435	109.438	52.2231	56.4305	53.6662	1.32911	1.43023	6.63606	0.857076
ENSG00000183036.10_2	PCP4	chr21:41239243-41301322	+	protein_coding	-4.39936	0.0473872	0.00357474	0.0269854	1.6522	6.05156	12.0076	127.823	72.5444	156.061	1.99416	0.746642	7.14866	1.29027
ENSG00000101938.14_2	CHRDL1	chrX:109917084-110039047	-	protein_coding	-4.36587	0.0485001	0.000338855	0.00897264	1.13798	5.50385	91.9348	30.4294	35.9635	38.2647	0.482945	1.12094	4.74127	0.298969
ENSG00000165966.14_2	PDZRN4	chr12:41582250-41968392	+	protein_coding	-4.35183	0.0489744	0.000163038	0.00690192	1.10441	5.45624	19.7154	39.845	64.7418	65.7872	1.65673	0.23102	2.64427	0.793166
ENSG00000196616.13_2	ADH1B	chr4:100226121-100273917	-	protein_coding	-4.27135	0.0517841	0.000622656	0.0114572	0.662667	4.93401	95.8898	18.0631	22.8654	18.811	0.0904918	0.109217	1.97718	0.74376
ENSG00000163017.13_3	ACTG2	chr2:74119441-74146992	+	protein_coding	-4.26968	0.0518438	0.0055247	0.0339789	3.37003	7.63972	37.6007	310.873	337.044	387.679	9.87124	5.75966	32.9941	3.5742
ENSG00000163431.12_3	LMOD1	chr1:201865580-201915716	-	protein_coding	-4.25458	0.0523895	0.00512971	0.0325979	3.41689	7.67147	35.6704	367.617	338.905	374.946	14.7057	5.11712	24.7225	4.26543
ENSG00000175084.11_2	DES	chr2:220283099-220291461	+	protein_coding	-4.23396	0.0531436	0.00775832	0.0411611	6.54024	10.7742	368.052	2744.33	3068.62	3023.55	72.9049	53.9788	447.543	40.1681
ENSG00000128591.15_2	FLNC	chr7:128470431-128499328	+	protein_coding	-4.18358	0.055032	0.00375076	0.0275882	2.46493	6.64851	24.0002	142.918	207.046	134.327	4.08685	2.84519	17.1802	1.61277
ENSG00000172403.10_4	SYNPO2	chr4:119771843-119982402	+	protein_coding	-4.15554	0.0561122	0.00469581	0.0309178	3.37129	7.52683	41.7947	322.649	284.582	291.423	6.9256	3.74606	35.9323	7.25398
ENSG00000130176.7_2	CNN1	chr19:11649532-11661138	+	protein_coding	-4.12644	0.0572558	0.00616744	0.0361153	3.28667	7.4131	35.4189	316.2	261.158	277.64	10.9033	5.20948	31.3187	2.79633
ENSG00000112936.18_2	C7	chr5:40909354-40983041	+	protein_coding	-4.12561	0.0572886	0.00233981	0.0219309	2.30005	6.42566	95.9747	91.0181	89.5855	66.557	11.583	0.577586	12.2254	1.24051
ENSG00000182253.14_2	SYNM	chr15:99638420-99675798	+	protein_coding	-4.11027	0.0579011	0.00955082	0.0463054	4.82378	8.93405	66.0461	973.482	925.917	944.101	21.081	21.3706	83.2637	14.4553
ENSG00000172987.12_3	HPSE2	chr10:100216834-100995619	-	protein_coding	-3.97294	0.0636832	0.00871798	0.043934	0.716204	4.68915	2.29907	32.0463	61.009	64.5129	0.803148	0.310874	1.45596	0.254818
ENSG00000004776.12_2	HSPB6	chr19:36245470-36248980	-	protein_coding	-3.93296	0.0654727	8.95952e-05	0.00562156	1.04677	4.97973	29.7995	34.5988	25.5292	33.0795	1.03653	0.392405	3.67429	0.374248
ENSG00000154330.12_3	PGM5	chr9:70943224-71145977	+	protein_coding	-3.88775	0.067557	0.00155973	0.0179684	0.980878	4.86863	6.66747	41.438	41.7396	51.3811	1.11991	0.340807	2.39243	0.573621
ENSG00000168477.17_3	TNXB	chr6:32008931-32083111	-	protein_coding	-3.85748	0.0689896	0.000470681	0.0100238	1.18582	5.0433	90.6989	27.4003	19.8348	20.7901	0.82456	0.58919	2.39539	1.72049
ENSG00000163623.9_2	NKX6-1	chr4:85413140-85419603	-	protein_coding	-3.81849	0.0708794	0.00597236	0.0355025	1.57182	5.39031	5.94262	54.304	75.3096	104.615	2.99894	1.76731	2.71976	0.897349
ENSG00000018625.14_2	ATP1A2	chr1:160085549-160113381	+	protein_coding	-3.79831	0.0718779	0.000907292	0.0136063	0.992798	4.79111	21.8179	27.9662	16.4752	49.8718	0.628749	0.132799	4.88525	0.444359
ENSG00000167676.4_3	PLIN4	chr19:4502192-4518477	-	protein_coding	-3.75397	0.074121	0.000471217	0.0100238	0.508819	4.26279	57.0435	12.4684	10.7585	13.7737	0.41852	0.198228	0.721862	0.400575
ENSG00000184905.8_2	TCEAL2	chrX:101380660-101382683	+	protein_coding	-3.72398	0.0756781	0.00339453	0.0263085	0.801357	4.52534	3.74347	31.2138	42.2259	41.5762	1.29223	0.599184	1.11694	0.188678
ENSG00000095637.21_3	SORBS1	chr10:97071528-97321171	-	protein_coding	-3.71727	0.0760309	0.000746851	0.0123994	2.60229	6.31956	36.1532	81.27	127.834	102.332	6.43244	3.05472	12.1507	2.43103
ENSG00000101335.9_2	MYL9	chr20:35169887-35179850	+	protein_coding	-3.65277	0.0795071	0.00702853	0.0387711	4.6731	8.32587	73.5407	496.68	504.614	564.181	39.4762	14.9405	59.8506	9.78963
ENSG00000197766.7_2	CFD	chr19:859643-863630	+	protein_coding	-3.63432	0.0805305	0.00257673	0.0230747	2.98399	6.61831	403.022	77.4021	40.0044	70.7264	4.69878	8.58867	8.76611	6.34214
ENSG00000167641.10_2	PPP1R14A	chr19:38741877-38747231	-	protein_coding	-3.62327	0.0811495	0.000551621	0.010742	2.68523	6.30851	27.0305	96.8394	99.9519	141.541	5.65917	7.79447	4.91681	3.93883
ENSG00000162614.18_3	NEXN	chr1:78354198-78409580	+	protein_coding	-3.5913	0.0829679	0.012932	0.0553679	3.60685	7.19815	24.2846	229.049	343.888	230.782	17.3756	6.62864	28.5503	4.31891
ENSG00000240583.11_3	AQP1	chr7:30951309-30965131	+	protein_coding	-3.5848	0.083343	0.00878756	0.0441549	3.06373	6.64852	43.652	142.643	112.051	138.708	11.6486	0.44154	16.6658	14.1737
ENSG00000171819.4_2	ANGPTL7	chr1:11249398-11256038	+	protein_coding	-3.57534	0.083891	0.00539628	0.0334743	0.577995	4.15333	72.5326	18.1467	5.90167	9.31777	0.208997	0.177677	2.3342	0.046002
ENSG00000164530.13_2	PI16	chr6:36916039-36932613	+	protein_coding	-3.54636	0.085593	0.00139669	0.0169198	0.62822	4.17458	38.1556	16.7577	7.86564	16.2508	0	0.481629	2.85223	0
ENSG00000116194.12_3	ANGPTL1	chr1:178818840-178840187	-	protein_coding	-3.54358	0.0857584	1.936e-05	0.00346544	0.601412	4.14499	12.1881	14.8777	17.5689	24.1947	0.393892	0.320826	1.35982	0.219604
ENSG00000065534.18_3	MYLK	chr3:123328896-123603178	-	protein_coding	-3.53076	0.086524	0.0185565	0.0689017	2.61966	6.15041	9.37519	142.531	107.113	157.13	5.45406	4.5994	16.0219	1.31952
ENSG00000260035.1_4	AC051619.8	chr15:45492523-45492830	-	sense_intronic	-3.51015	0.0877687	0.00249599	0.0226867	0.452464	3.96261	63.1606	6.13492	10.575	10.1502	0.332685	0.160212	0.55341	0.459722
ENSG00000198947.15_3	DMD	chrX:31115794-33357558	-	protein_coding	-3.50617	0.0880113	0.0030991	0.0250696	2.25078	5.75695	14.3802	74.4589	86.6589	83.0601	3.58735	1.28682	8.29856	4.2602
ENSG00000071991.8_2	CDH19	chr18:64168320-64271375	-	protein_coding	-3.50344	0.0881779	0.00016346	0.00690192	0.886047	4.38949	31.0862	19.2084	20.6015	12.7763	0.893847	0.410502	2.54491	0.231924
ENSG00000233117.2_2	LINC00702	chr10:4243333-4286104	-	lincRNA	-3.48767	0.0891469	0.0160625	0.0629862	0.888056	4.37573	1.7587	57.43	23.7359	45.5835	1.2632	0.415972	2.04382	0.202621
ENSG00000188783.5_2	PRELP	chr1:203444956-203460480	+	protein_coding	-3.44995	0.0915088	0.00117597	0.0155613	1.78311	5.23306	46.6074	28.0692	31.0545	44.1059	8.96541	0.475893	1.93305	2.25245
ENSG00000165072.9_3	MAMDC2	chr9:72658497-72841886	+	protein_coding	-3.44378	0.0919005	0.000147059	0.00668791	1.26663	4.71041	24.1214	24.8219	26.4095	25.4223	1.23233	0.338211	4.17375	1.16814
ENSG00000168497.4_3	CAVIN2	chr2:192699028-192711981	-	protein_coding	-3.40956	0.0941066	5.42569e-05	0.00503952	3.08967	6.49923	53.2998	97.1163	102.581	120.347	10.9994	6.73867	8.66316	4.85305
ENSG00000146966.12_2	DENND2A	chr7:140218220-140373793	-	protein_coding	-3.40867	0.0941649	8.58801e-06	0.00271703	0.993867	4.40253	12.4141	24.129	25.0627	21.773	1.31744	0.679241	1.13897	0.889765
ENSG00000022267.16_3	FHL1	chrX:135228861-135293518	+	protein_coding	-3.38285	0.0958655	0.00156115	0.0179684	1.92438	5.30723	29.4553	46.6788	39.2335	41.0693	3.39128	0.797003	10.6208	1.26368
ENSG00000170323.8_2	FABP4	chr8:82390654-82395498	-	protein_coding	-3.36792	0.0968627	0.0448096	0.119916	2.16177	5.52969	462.385	17.6307	17.2666	27.8788	1.00991	16.7698	3.94157	1.27148
ENSG00000101605.12_3	MYOM1	chr18:3066805-3220106	-	protein_coding	-3.36775	0.0968739	0.00726972	0.0395382	1.1939	4.56165	4.98809	39.3786	32.9476	36.8902	0.694801	0.52229	5.82395	0.555785
ENSG00000079308.16_3	TNS1	chr2:218664512-218867718	-	protein_coding	-3.36045	0.097365	0.000453361	0.00999892	2.95001	6.31047	36.3591	92.841	101.234	109.707	8.77899	3.52865	11.3711	5.50877
ENSG00000198467.13_3	TPM2	chr9:35681989-35691017	-	protein_coding	-3.35919	0.09745	0.0141625	0.0584054	5.17848	8.53767	68.0183	598.567	659.102	697.175	48.728	21.4211	90.5247	15.8542
ENSG00000189367.14_4	KIAA0408	chr6:127761488-127780536	-	protein_coding	-3.32039	0.100107	0.00142137	0.0171105	0.637201	3.95759	4.06788	18.6548	18.4638	29.053	0.957642	1.0345	0.267759	0.158881
ENSG00000132840.9_2	BHMT2	chr5:78365540-78385289	+	protein_coding	-3.31115	0.10075	3.65155e-05	0.0044404	0.877895	4.18904	11.0773	15.7143	24.2806	20.6901	1.06753	0.365281	1.52923	0.597458
ENSG00000156218.12_3	ADAMTSL3	chr15:84322838-84708594	+	protein_coding	-3.298	0.101672	6.78076e-06	0.00271703	0.736357	4.03436	20.9067	11.9103	15.983	14.0082	0.820451	0.656678	1.0769	0.229788
ENSG00000118407.14_3	FILIP1	chr6:76001575-76203454	-	protein_coding	-3.29501	0.101883	0.00380858	0.027767	2.15074	5.44576	10.5487	52.4336	76.8389	74.1277	4.06157	1.51913	6.08936	3.30143
ENSG00000131471.6_3	AOC3	chr17:41003201-41010147	+	protein_coding	-3.29493	0.101889	0.000159757	0.00690192	1.44861	4.74355	16.377	27.5873	28.4848	34.1605	2.22256	1.46371	3.53416	0.541767
ENSG00000166963.12_3	MAP1A	chr15:43803156-43823818	+	protein_coding	-3.29415	0.101944	0.000490239	0.0101739	1.94707	5.24122	21.2216	43.5011	45.0623	43.9332	3.29835	1.98421	7.06357	1.13724
ENSG00000118729.11_2	CASQ2	chr1:116242628-116311402	-	protein_coding	-3.27523	0.10329	0.0317256	0.0962783	1.37724	4.65246	2.9453	39.1469	43.7294	55.4677	1.43807	0.30623	10.7511	0.216781
ENSG00000183963.18_4	SMTN	chr22:31460091-31500743	+	protein_coding	-3.26874	0.103755	0.0135233	0.0568339	2.73673	6.00547	9.6544	96.7937	119.788	134.346	6.29622	4.53759	11.8956	2.78873
ENSG00000189058.8_3	APOD	chr3:195295573-195311076	-	protein_coding	-3.26728	0.103861	0.023284	0.0794055	2.92786	6.19513	461.232	23.8945	48.7015	49.3909	6.01144	2.31325	21.3223	5.46684
ENSG00000267405.1_3	AC005180.1	chr17:42872115-42875151	-	lincRNA	-3.26451	0.104061	0.00380116	0.0277491	0.39331	3.65782	2.19767	17.3696	26.7992	14.5412	0.187589	0.147979	1.01124	0.085244
ENSG00000005249.12_2	PRKAR2B	chr7:106685094-106802256	+	protein_coding	-3.26347	0.104135	0.000346379	0.00907007	1.63733	4.9008	56.5433	14.1638	25.5283	33.4068	1.3103	2.20458	1.79825	3.52083
ENSG00000249669.9_3	CARMN	chr5:148786252-148812398	+	lincRNA	-3.26126	0.104295	0.0149845	0.0603842	2.65657	5.91782	13.0785	68.6831	112.132	119.365	13.4169	2.1851	11.8036	1.68842
ENSG00000136546.13_2	SCN7A	chr2:167260083-167350757	-	protein_coding	-3.25041	0.105082	0.000461251	0.0100012	1.16189	4.4123	12.1696	24.4808	29.4216	19.1358	2.29784	0.45784	2.86599	0.348515
ENSG00000124212.5_2	PTGIS	chr20:48120411-48184683	-	protein_coding	-3.24649	0.105368	2.19584e-05	0.00361265	1.14442	4.39091	28.9463	12.4069	19.635	22.3833	1.55637	0.809873	1.57685	1.00291
ENSG00000092009.10_2	CMA1	chr14:24974559-24977471	-	protein_coding	-3.23783	0.106002	0.00156599	0.0179909	0.728532	3.96636	10.2856	28.2301	16.438	9.37819	0	0.231613	3.43642	0.379535
ENSG00000106772.17_3	PRUNE2	chr9:79226292-79521003	-	protein_coding	-3.21212	0.107909	0.0198083	0.0719382	2.29286	5.50497	6.90085	70.7858	78.9826	92.7438	4.33308	1.9767	13.4898	1.50668
ENSG00000151892.14_2	GFRA1	chr10:117816436-118032979	-	protein_coding	-3.21171	0.107939	0.000344108	0.00905206	0.942271	4.15398	27.4277	22.2413	13.7162	9.32998	1.84876	0.464268	1.60281	0.255704
ENSG00000198624.12_2	CCDC69	chr5:150560613-150603706	-	protein_coding	-3.1856	0.10991	0.000395781	0.00945114	2.03811	5.22371	29.1079	32.8729	36.4003	50.1177	1.59248	1.65237	3.67145	7.85781
ENSG00000146122.16_2	DAAM2	chr6:39760074-39872653	+	protein_coding	-3.18484	0.109968	0.00106306	0.0148293	1.33621	4.52105	7.58889	25.6171	32.545	35.2375	2.92685	1.27294	1.61448	0.741565
ENSG00000116741.7_2	RGS2	chr1:192778169-192781413	+	protein_coding	-3.18378	0.110049	0.00153745	0.0178382	3.94119	7.12498	350.308	87.2258	81.0702	148.23	13.2601	13.9417	26.7329	8.42222
ENSG00000198626.15_2	RYR2	chr1:237205505-237997288	+	protein_coding	-3.18348	0.110072	0.0296191	0.0925696	1.33012	4.5136	1.74518	38.5535	43.7245	55.0551	4.91643	0.396919	1.71711	0.779448
ENSG00000106809.10_2	OGN	chr9:95146249-95166978	-	protein_coding	-3.13219	0.114056	0.0042287	0.0293751	1.31854	4.45073	37.854	23.939	10.9168	18.8033	4.11165	0.30839	4.16613	0.120009
ENSG00000141052.17_2	MYOCD	chr17:12569207-12672266	+	protein_coding	-3.11349	0.115544	0.0110395	0.0503055	0.686953	3.80044	1.42133	23.7323	23.1268	25.0839	0.824663	0.56466	1.01197	0.169365
ENSG00000137878.16_3	GCOM1	chr15:57884106-58006943	+	protein_coding	-3.11133	0.115717	0.00274776	0.0237968	1.09745	4.20878	5.35176	21.1205	27.3407	28.3611	0.72423	1.48943	0.225362	2.98568
ENSG00000160307.9_2	S100B	chr21:48018875-48025121	-	protein_coding	-3.08589	0.117775	0.00394183	0.0282597	1.42854	4.51442	69.7332	16.6851	15.9037	11.9032	0.725163	0.669015	2.62265	4.03282
ENSG00000197256.10_3	KANK2	chr19:11274943-11308467	-	protein_coding	-3.07575	0.118606	0.00125973	0.0161527	3.06602	6.14176	30.0314	87.3465	88.8544	99.8997	9.60422	6.59249	13.0748	3.34055
ENSG00000119508.17_2	NR4A3	chr9:102584137-102629173	+	protein_coding	-3.07417	0.118736	0.00313612	0.0251932	1.28591	4.36008	39.4006	9.35378	25.5776	14.9978	0.718687	0.262286	4.89988	1.76179
ENSG00000100448.3_2	CTSG	chr14:25042728-25045466	-	protein_coding	-3.06622	0.119392	0.00118195	0.0155613	1.25772	4.32395	14.1532	34.6343	27.8567	9.32591	0.88946	0.633228	3.6504	1.27812
ENSG00000119147.9_3	C2orf40	chr2:106679702-106694615	+	protein_coding	-3.03773	0.121774	2.33994e-05	0.00376506	0.522861	3.56059	8.46702	9.84756	10.5937	15.2783	0.540433	0.0465669	1.01654	0.310907
ENSG00000138735.15_2	PDE5A	chr4:120415550-120550146	-	protein_coding	-3.0297	0.122453	0.00321468	0.0255768	2.91151	5.94121	19.333	85.6188	81.9797	96.5326	9.70872	3.85831	11.2633	4.02321
ENSG00000107796.13_3	ACTA2	chr10:90694831-90751096	-	protein_coding	-3.02702	0.122681	0.0139703	0.0579615	5.09504	8.12206	74.7705	403.578	403.527	484.837	68.013	24.8454	65.6318	10.4828
ENSG00000109906.13_3	ZBTB16	chr11:113930315-114121398	+	protein_coding	-3.02248	0.123068	0.000204014	0.00750791	0.41785	3.44033	7.29583	6.00755	17.3865	11.991	0.0900581	0.120371	1.03228	0.283355
ENSG00000266964.5_3	FXYD1	chr19:35629712-35634013	+	protein_coding	-3.01642	0.123585	1.09375e-05	0.00277535	0.258664	3.27509	11.0551	6.65623	8.37158	9.1531	0.0459352	0	0.727216	0.133994
ENSG00000141338.13_3	ABCA8	chr17:66863433-66951533	-	protein_coding	-3.00607	0.124475	0.00419561	0.0292618	1.00476	4.01083	53.957	11.0719	9.41441	8.77425	0.929698	0.265844	2.61341	0.836812
ENSG00000136732.14_3	GYPC	chr2:127413509-127454251	+	protein_coding	-3.00444	0.124616	2.32079e-05	0.00376288	1.64056	4.645	25.1495	22.6825	24.9808	23.3555	2.1856	0.882931	2.96502	2.9734
ENSG00000136842.13_2	TMOD1	chr9:100263462-100364030	+	protein_coding	-2.99772	0.125198	0.000763586	0.0125322	1.4875	4.48522	14.3662	18.8095	25.5545	30.1289	1.21286	3.32031	3.71174	0.372399
ENSG00000280143.1_3	AP000892.3	chr11:117075683-117081008	+	TEC	-2.98237	0.126537	0.010664	0.0494106	1.66763	4.65	4.25246	47.7901	34.5311	42.6373	2.82973	1.90219	3.93965	0.855414
ENSG00000198523.5_2	PLN	chr6:118869461-118881893	+	protein_coding	-2.97948	0.126791	0.0225685	0.0778794	2.0069	4.98638	5.6711	49.4916	41.2456	69.9582	2.63646	2.63161	11.3578	0.598922
ENSG00000121769.7_3	FABP3	chr1:31838472-31849697	-	protein_coding	-2.93634	0.130639	0.00120119	0.0156752	1.59426	4.5306	18.7567	31.127	17.4691	23.3419	3.45984	0.626366	5.25713	0.831325
ENSG00000121898.12_3	CPXM2	chr10:125465723-125699783	-	protein_coding	-2.93627	0.130645	0.000589833	0.0111838	2.04788	4.98415	28.5372	39.1585	25.6249	30.7748	7.76412	2.06623	3.8577	1.23949
ENSG00000185437.13_3	SH3BGR	chr21:40817781-40887433	+	protein_coding	-2.93286	0.130955	0.0274826	0.088313	2.15095	5.08381	4.06229	82.541	81.919	36.7242	2.60797	2.85687	7.92792	2.13154
ENSG00000106511.5_2	MEOX2	chr7:15650837-15726437	-	protein_coding	-2.92167	0.131975	0.000278272	0.00831705	0.818586	3.74025	24.7543	7.53048	12.1645	10.0277	1.16485	0.23296	1.04586	0.771834
ENSG00000122367.19_3	LDB3	chr10:88428206-88495825	+	protein_coding	-2.90879	0.133158	0.0189518	0.0698598	0.84933	3.75812	1.75309	24.3989	18.4814	23.6019	0.625653	0.167125	3.85175	0.144595
ENSG00000114200.9_3	BCHE	chr3:165490692-165555260	-	protein_coding	-2.90838	0.133196	0.0100085	0.047629	1.13152	4.0399	2.63059	26.0906	22.1186	31.1935	2.0155	0.485394	2.10053	0.659031
ENSG00000127951.6_3	FGL2	chr7:76822688-76829165	-	protein_coding	-2.908	0.133231	0.00366936	0.02734	3.80084	6.70885	59.467	102.704	118.998	158.135	6.5617	6.55845	16.3712	37.0005
ENSG00000164107.8_2	HAND2	chr4:174446120-174451380	-	protein_coding	-2.90568	0.133446	0.00803642	0.0418665	0.934359	3.84004	2.45915	24.7836	22.1373	19.3816	1.5692	0.877599	1.54785	0.0851887
ENSG00000179820.15_3	MYADM	chr19:54369477-54379691	+	protein_coding	-2.89153	0.13476	0.0113906	0.0513221	2.72606	5.6176	14.5782	68.7151	69.8554	74.5167	3.9525	2.85559	21.0364	3.5546
ENSG00000149591.16_3	TAGLN	chr11:117070037-117075498	+	protein_coding	-2.88617	0.135263	0.0179388	0.0675271	4.30572	7.19189	36.8178	238.016	209.26	239.446	35.74	15.5588	38.2675	5.40335
ENSG00000189129.13_2	PLAC9	chr10:81891438-81905115	+	protein_coding	-2.88316	0.135545	0.00255719	0.0229937	1.1485	4.03165	41.0703	15.0589	8.2895	10.4001	2.46989	0.519935	2.07037	0.491405
ENSG00000123570.3_3	RAB9B	chrX:103077252-103087158	-	protein_coding	-2.84459	0.139218	0.002111	0.0208131	0.53878	3.38337	2.4776	11.8631	12.9785	17.9623	0.568324	0.264426	0.717286	0.30793
ENSG00000122786.19_3	CALD1	chr7:134429003-134655479	+	protein_coding	-2.84139	0.139526	0.0215579	0.0760338	5.93023	8.77162	85.2795	769.781	747.594	731.826	102.921	42.7814	109.586	26.48
ENSG00000110318.13_2	CEP126	chr11:101785746-101871789	+	protein_coding	-2.83824	0.139832	0.000159418	0.00690192	1.30844	4.14668	11.675	15.6659	19.307	21.9444	1.06026	3.45555	1.11078	0.942005
ENSG00000149451.17_2	ADAM33	chr20:3648612-3662893	-	protein_coding	-2.82653	0.140971	3.03884e-05	0.00417142	1.12186	3.94839	19.8182	11.5963	12.5189	15.0216	2.09868	0.620199	1.01706	1.21511
ENSG00000174099.10_3	MSRB3	chr12:65672423-65882024	+	protein_coding	-2.82602	0.141021	0.00452869	0.0303667	2.57808	5.40411	14.5247	55.8965	57.2121	61.5273	3.55233	9.54232	7.82587	2.0019
ENSG00000064205.10_2	WISP2	chr20:43343485-43357150	+	protein_coding	-2.8165	0.141954	1.29045e-05	0.00290793	0.354993	3.17149	6.1926	10.3979	6.2515	10.0846	0.245216	0.234789	0.594171	0.0916449
ENSG00000140416.19_4	TPM1	chr15:63334831-63364114	+	protein_coding	-2.81566	0.142037	0.0221785	0.0772311	4.32475	7.14041	27.83	238.025	224.111	254.402	24.8145	14.6205	44.8915	7.71414
ENSG00000133800.8_3	LYVE1	chr11:10578513-10633236	-	protein_coding	-2.81447	0.142155	0.000566954	0.0109453	0.898329	3.7128	21.3054	12.3859	7.9638	10.0434	0.22431	0.619846	2.45806	0.759941
ENSG00000147588.6_2	PMP2	chr8:82352561-82359758	-	protein_coding	-2.81247	0.142351	0.0014291	0.0171624	0.310912	3.12338	20.8538	5.14717	7.06834	4.32038	0.092323	0.067334	0.9237	0.055812
ENSG00000152137.6_3	HSPB8	chr12:119616447-119658936	+	protein_coding	-2.80243	0.143345	0.00829709	0.0427918	2.22787	5.0303	13.312	31.4341	56.6285	41.6336	4.82774	0.422506	7.24055	6.04881
ENSG00000143867.6_2	OSR1	chr2:19551246-19558414	-	protein_coding	-2.79662	0.143924	0.000166823	0.00695097	0.931021	3.72764	13.5161	13.7884	12.8431	9.36387	0.808814	1.17064	2.10064	0.0854962
ENSG00000152583.12_3	SPARCL1	chr4:88394487-88452213	-	protein_coding	-2.79598	0.143988	0.00127019	0.0162058	6.05005	8.84603	260.806	537.866	546.409	579.647	102.525	28.3978	68.3872	90.2738
ENSG00000069702.10_2	TGFBR3	chr1:92145900-92371892	-	protein_coding	-2.78151	0.145439	0.000259821	0.00814903	1.66092	4.44243	30.7106	15.9325	17.5335	21.4561	2.95835	0.824194	1.90131	3.77266
ENSG00000181856.14_2	SLC2A4	chr17:7184986-7191576	+	protein_coding	-2.77276	0.146324	0.00281819	0.0240814	0.617759	3.39052	3.37882	14.8484	21.3695	6.791	0.453839	0.142649	1.35563	0.416835
ENSG00000211445.11_4	GPX3	chr5:150399999-150408554	+	protein_coding	-2.7698	0.146625	0.00416341	0.0291296	2.62671	5.39651	119.264	22.6151	31.589	33.013	3.8665	2.88831	5.77105	10.3563
ENSG00000280551.1_4	AC096745.2	chr4:119963179-119965092	+	TEC	-2.76492	0.147122	0.00812004	0.0421447	1.38293	4.14785	3.83053	29.0418	22.786	27.6064	2.07585	0.423721	1.48287	3.25472
ENSG00000180354.15_4	MTURN	chr7:30174426-30202378	+	protein_coding	-2.76049	0.147574	0.00140142	0.0169587	1.28243	4.04292	5.53103	19.1664	22.567	22.782	0.823364	2.36494	1.00868	1.84077
ENSG00000154188.9_3	ANGPT1	chr8:108261710-108510283	-	protein_coding	-2.76015	0.147609	0.000118935	0.00607571	0.995822	3.75597	7.00744	15.9074	16.1307	13.3646	1.35809	0.533517	1.55633	0.710895
ENSG00000184785.5_2	SMIM10	chrX:134124968-134126503	+	protein_coding	-2.7596	0.147665	0.00128607	0.0162852	1.44755	4.20715	8.40824	20.8516	20.0612	25.8807	3.60366	0.662822	2.69261	0.957687
ENSG00000173641.17_4	HSPB7	chr1:16340523-16346089	-	protein_coding	-2.75421	0.148218	0.00443384	0.0301084	0.94371	3.69792	4.72784	16.3582	15.2535	16.5505	0.894731	0.303544	3.9459	0.120525
ENSG00000173175.14_4	ADCY5	chr3:123001143-123168605	-	protein_coding	-2.74179	0.1495	0.0178362	0.0673467	1.08697	3.82876	2.04352	18.2946	22.5672	28.4554	0.669362	0.215949	1.30498	3.35222
ENSG00000131016.16_2	AKAP12	chr6:151561134-151679692	+	protein_coding	-2.73682	0.150015	0.00436639	0.0298409	3.44868	6.1855	73.8288	32.759	166.175	65.4437	14.4142	14.1606	11.4959	3.86651
ENSG00000268388.5_2	FENDRR	chr16:86508135-86542705	-	lincRNA	-2.73085	0.150637	0.00481717	0.0314423	1.07377	3.80462	3.21213	16.1241	21.8185	22.1645	1.0831	0.444816	2.11648	1.09296
ENSG00000127528.5_2	KLF2	chr19:16435628-16438685	+	protein_coding	-2.71234	0.152583	0.000338311	0.00897264	2.10563	4.81796	30.6942	21.0023	21.4474	39.4383	4.18269	1.34946	5.2268	3.52521
ENSG00000120693.13_3	SMAD9	chr13:37418968-37494902	-	protein_coding	-2.71179	0.15264	0.000600863	0.0112411	1.35196	4.06375	6.85711	20.707	20.63	20.1993	1.73463	1.98041	2.05561	0.704695
ENSG00000145936.8_2	KCNMB1	chr5:169801675-169816681	-	protein_coding	-2.71173	0.152646	0.0173652	0.0661356	0.632956	3.34469	0.850194	15.2008	18.6627	17.0722	0.353765	0.327753	1.03301	0.582536
ENSG00000172201.11_3	ID4	chr6:19837617-19840915	+	protein_coding	-2.70222	0.153656	0.00919179	0.0451951	2.87991	5.58213	17.4256	68.3486	61.0179	65.4626	16.5754	1.7726	6.28751	7.26767
ENSG00000174348.13_2	PODN	chr1:53527724-53551174	+	protein_coding	-2.69833	0.154071	0.0135361	0.0568364	2.08514	4.78347	86.5773	17.4324	20.5842	15.5108	8.95197	1.37018	5.38703	1.15164
ENSG00000170381.12_2	SEMA3E	chr7:82993222-83278326	-	protein_coding	-2.69679	0.154235	0.00129519	0.0163477	0.470441	3.16724	2.68931	8.48	13.0048	12.2954	0.172701	0.727905	0.64823	0.103423
ENSG00000140285.9_2	FGF7	chr15:49715293-49780972	+	protein_coding	-2.68196	0.155829	0.000365634	0.00916407	1.5861	4.26806	17.4956	14.5797	22.6497	19.2208	3.2144	1.15488	3.89621	0.827393
ENSG00000102802.9_2	MEDAG	chr13:31480328-31499709	+	protein_coding	-2.67592	0.156483	0.0112645	0.050898	2.11974	4.79567	73.9929	12.2624	25.829	21.3003	5.49446	2.02172	8.5361	0.906589
ENSG00000145362.17_3	ANK2	chr4:113739265-114304896	+	protein_coding	-2.67026	0.157098	0.000125714	0.00622349	1.14865	3.81891	8.69553	13.5985	17.5062	14.1435	1.23535	1.08745	2.38401	0.530074
ENSG00000076555.15_3	ACACB	chr12:109554400-109706031	+	protein_coding	-2.6696	0.157171	3.67547e-06	0.00223152	1.0242	3.69379	16.4096	9.39385	10.3991	12.5936	1.14347	0.965636	0.992077	1.03859
ENSG00000198157.10_4	HMGN5	chrX:80369200-80457441	-	protein_coding	-2.65882	0.158349	0.00448495	0.0302396	1.84482	4.50364	7.39512	25.8315	33.4772	33.0976	6.05021	1.47636	1.4902	2.82945
ENSG00000138615.5_3	CILP	chr15:65487096-65503826	-	protein_coding	-2.65549	0.158715	0.00324188	0.0256964	1.33581	3.9913	28.9527	17.5186	7.67782	12.2907	3.1403	1.21873	2.7494	0.178633
ENSG00000196557.12_1	CACNA1H	chr16:1203121-1271772	+	protein_coding	-2.65155	0.159149	0.0214493	0.0757103	1.12975	3.7813	1.42639	18.8185	24.0818	28.6313	1.67138	0.659435	1.61415	0.978467
ENSG00000280429.1_3	AF001548.3	chr16:15884832-15886574	-	TEC	-2.64966	0.159358	0.00586577	0.0351491	0.513207	3.16286	1.53228	13.0967	10.7186	14.3802	0.503621	0.247754	0.928843	0.146565
ENSG00000205002.3_2	AARD	chr8:117950438-117956726	+	protein_coding	-2.64699	0.159653	0.0287941	0.0909157	0.389682	3.03667	0.358381	8.10142	21.7477	15.1229	0.135749	0.902041	0.256617	0.0852222
ENSG00000076706.16_3	MCAM	chr11:119179239-119192231	-	protein_coding	-2.6317	0.161354	0.000260905	0.00814903	2.8888	5.5205	24.0255	50.3032	61.2019	54.5917	7.98716	4.57596	8.09294	5.60409
ENSG00000149596.6_2	JPH2	chr20:42740335-42816218	-	protein_coding	-2.63015	0.161528	0.0120504	0.0532334	0.664164	3.29431	1.34813	13.6766	13.8974	17.0421	0.744722	0.228986	1.56365	0.147102
[truncated: 1,722 more rows]
